# Supplementary material for: Transcriptome and Quasi-Targeted Metabolome Analyze Overexpression of 4-Hydroxyphenylpyruvate Dioxygenase Alleviates Fungal Toxicity of 9-Phenanthrol in Magnaporthe oryzae
Source: MDPI journal article supplement (doi:10.3390/ijms23137116), 2022-06-27
Supplement: s1 [file s1]

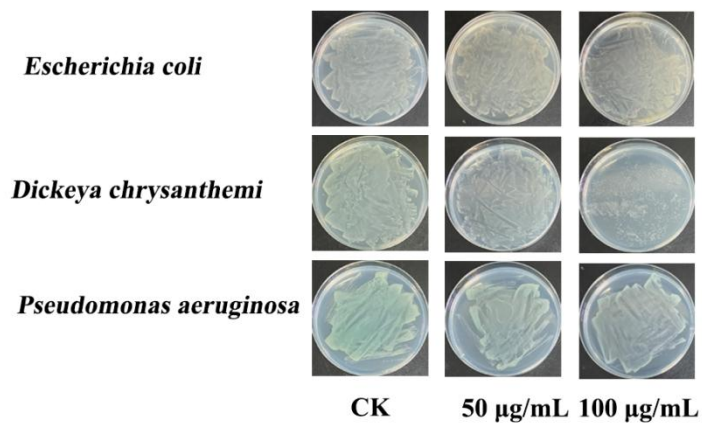

Figure S1. The colony of different bacteria with 9-phenanthrol treatment.

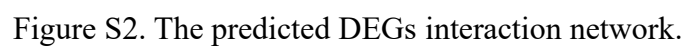

Figure S2. The predicted DEGs interaction network.
