# Supplementary material for: Transcriptome and Quasi-Targeted Metabolome Analyze Overexpression of 4-Hydroxyphenylpyruvate Dioxygenase Alleviates Fungal Toxicity of 9-Phenanthrol in Magnaporthe oryzae
Source: Int J Mol Sci. 2022 Jun 27;23(13):7116. doi: 10.3390/ijms23137116 (PMC9266922; doi:10.3390/ijms23137116)
Supplement: Supplementary file 1 [file ijms-23-07116-s001.zip]

Archive with 10 entries (10 files):
- Supplementary figures.pdf
- Table S1.xlsx
- Table S2.xlsx
- Table S3.xlsx
- Table S4.xlsx
- Table S5.xlsx
- Table S6.xlsx
- Table S7.xls
- Table S8.xlsx
- Table S9.xlsx
