# Supplementary material for: Transcriptome and Quasi-Targeted Metabolome Analyze Overexpression of 4-Hydroxyphenylpyruvate Dioxygenase Alleviates Fungal Toxicity of 9-Phenanthrol in Magnaporthe oryzae
Source: Int J Mol Sci. 2022 Jun 27;23(13):7116. doi: 10.3390/ijms23137116 (PMC9266922; doi:10.3390/ijms23137116)
Supplement: Supplementary file 1 [file ijms-23-07116-s001.zip › Table S1.xlsx]

## Sheet: Table S3
Table S1. The information of DEGs with 9_phenanthrol treatment in M. oryzae
Gene name	Gene_id	FC(9_Phenanthrol/ck)	Log2FC(9_Phenanthrol/ck)	Pvalue	Padjust	Significant	Regulate	ck	9_Phenanthrol	CK_1	CK_2	CK_3	T_1	T_2	T_3	Gene description
MGG_16744	gene-MGG_16744	0.00139762	-9.48281	4.79e-20	2.64e-19	yes	down	7.6	0.01	6.13	7.44	9.23	0	0	0.03	hypothetical protein
MGG_03498	gene-MGG_03498	0.0030879	-8.33916	3.89e-11	1.44e-10	yes	down	1.89	0	0.85	2.12	2.7	0	0	0	hypothetical protein
MGG_10751	gene-MGG_10751	0.00414968	-7.91279	1.34e-26	9.1e-26	yes	down	8.17667	0.0366667	7.48	8.4	8.65	0.03	0	0.08	peroxisomal copper amine oxidase
MGG_03499	gene-MGG_03499	0.0045383	-7.78363	8.66e-10	2.96e-09	yes	down	4.67667	0	5.92	3.71	4.4	0	0	0	hypothetical protein
MGG_07420	gene-MGG_07420	0.00677765	-7.205	1.75e-07	5.19e-07	yes	down	0.806667	0	0.47	1.72	0.23	0	0	0	hypothetical protein
MGG_02530	gene-MGG_02530	0.00809752	-6.9483	1.63e-15	7.43e-15	yes	down	4.33333	0.0433333	4.25	4.56	4.19	0.09	0.04	0	quinate permease
MGG_17539	gene-MGG_17539	0.00859977	-6.86149	9.24e-05	0.00021539	yes	down	10.3633	0.103333	9.43	9.72	11.94	0.31	0	0	ATP-dependent rRNA helicase RRP3
MGG_02309	gene-MGG_02309	0.00902767	-6.79143	1.5e-61	2.19e-60	yes	down	14.7033	0.153333	15.54	14.41	14.16	0.11	0.23	0.12	carboxypeptidase S1
MGG_10394	gene-MGG_10394	0.0118484	-6.39916	7.88e-06	2.04e-05	yes	down	0.563333	0	0.51	0.98	0.2	0	0	0	hypothetical protein
MGG_02120	gene-MGG_02120	0.0161517	-5.95217	4.82e-05	0.000115706	yes	down	0.39	0	0.29	0.54	0.34	0	0	0	sterigmatocystin 8-O-methyltransferase
MGG_13334	gene-MGG_13334	0.0167301	-5.90141	0.000128065	0.000294328	yes	down	0.24	0	0.42	0.05	0.25	0	0	0	general amino acid permease AGP2
MGG_05555	gene-MGG_05555	0.0168735	-5.8891	2.48e-25	1.62e-24	yes	down	6.81333	0.13	6.32	8.3	5.82	0.05	0.25	0.09	xenobiotic compound monooxygenase
MGG_02522	gene-MGG_02522	0.0176662	-5.82286	7.57e-13	3.07e-12	yes	down	4.44667	0.446667	4.68	2.83	5.83	0	0	1.34	hypothetical protein
MGG_06798	gene-MGG_06798	0.0184041	-5.76383	2.21e-05	5.47e-05	yes	down	0.963333	0.0166667	0.94	0.56	1.39	0	0	0.05	hypothetical protein
MGG_07846	gene-MGG_07846	0.0232117	-5.429	8.69e-05	0.000203121	yes	down	0.63	0.0133333	0.74	0.51	0.64	0	0	0.04	endoglucanase family 5 glycoside hydrolase
MGG_18090	gene-MGG_18090	0.0237344	-5.39688	9.73e-05	0.000226314	yes	down	1.64667	0.0433333	1.85	1.63	1.46	0.13	0	0	hypothetical protein
MGG_08281	gene-MGG_08281	0.0242617	-5.36517	3.89e-08	1.2e-07	yes	down	0.41	0.0133333	0.22	0.66	0.35	0.04	0	0	polyketide synthase
MGG_13993	gene-MGG_13993	0.024893	-5.32812	2.65e-08	8.3e-08	yes	down	2.22667	0.0666667	3.05	2.02	1.61	0.14	0.06	0	hypothetical protein
MGG_10785	gene-MGG_10785	0.025109	-5.31565	2.23e-08	7.03e-08	yes	down	3.19667	0.0966667	2.62	3.79	3.18	0.29	0	0	meiotic chromosome segregation protein
MGG_07868	gene-MGG_07868	0.0264027	-5.24317	1.81e-36	1.59e-35	yes	down	7.77333	0.23	7.28	8.1	7.94	0.33	0.09	0.27	glycosyl hydrolase family 10
MGG_08266	gene-MGG_08266	0.0264306	-5.24165	0.00123328	0.00252945	yes	down	0.216667	0	0.3	0.19	0.16	0	0	0	maltose permease MAL61
MGG_06800	gene-MGG_06800	0.0291886	-5.09845	0.00206238	0.00410467	yes	down	0.53	0	0.64	0.48	0.47	0	0	0	hypothetical protein
MGG_16037	gene-MGG_16037	0.0304305	-5.03834	0.000457687	0.000989962	yes	down	2.38	0.08	1.69	2.56	2.89	0.24	0	0	hypothetical protein
MGG_15344	gene-MGG_15344	0.0313601	-4.99493	0.00236861	0.00467993	yes	down	0.326667	0.01	0.49	0.44	0.05	0	0	0.03	hypothetical protein
MGG_16055	gene-MGG_16055	0.0313608	-4.99489	0.000612681	0.00130751	yes	down	1.52667	0.0466667	2.29	1.24	1.05	0	0	0.14	hypothetical protein
MGG_07630	gene-MGG_07630	0.0318977	-4.9704	4.76e-09	1.56e-08	yes	down	32.33	1.13	25.26	63.89	7.84	1.33	1.42	0.64	hypothetical protein
MGG_08736	gene-MGG_08736	0.0320549	-4.96331	7.84e-36	6.76e-35	yes	down	5.84	0.176667	6.39	5	6.13	0.19	0.22	0.12	carboxypeptidase 2
MGG_16167	gene-MGG_16167	0.0333656	-4.9055	0.0057378	0.0107602	yes	down	0.216667	0	0.32	0.27	0.06	0	0	0	hypothetical protein
MGG_08363	gene-MGG_08363	0.0335547	-4.89734	0	0	yes	down	101.407	3.81	99.55	108.75	95.92	4.74	3.15	3.54	enoyl reductase
MGG_15100	gene-MGG_15100	0.0344593	-4.85896	0	0	yes	down	87.2133	3.37333	79.39	96.87	85.38	4.08	2.97	3.07	polyketide synthase
MGG_17864	gene-MGG_17864	0.0356533	-4.80982	1.35e-31	1.05e-30	yes	down	10.5667	0.413333	8.72	11.77	11.21	0.23	0.5	0.51	glycosyl hydrolase family 88
MGG_10287	gene-MGG_10287	0.0366705	-4.76923	0.00703272	0.0130163	yes	down	0.183333	0	0.1	0.29	0.16	0	0	0	metabolite transporter
MGG_09404	gene-MGG_09404	0.0373335	-4.74338	9.59e-55	1.25e-53	yes	down	8.83667	0.373333	9.46	8.96	8.09	0.56	0.13	0.43	feruloyl esterase B
MGG_08359	gene-MGG_08359	0.0385023	-4.69891	0	0	yes	down	322.183	13.9267	316.32	331.66	318.57	15.54	13.24	13	flavonol synthase
MGG_15987	gene-MGG_15987	0.0420072	-4.57322	1.96e-05	4.88e-05	yes	down	1.13	0.0566667	2.05	0.78	0.56	0	0.06	0.11	hypothetical protein
MGG_17532	gene-MGG_17532	0.0425058	-4.5562	5.9e-172	2.95e-170	yes	down	49.7733	2.37667	41.34	55.94	52.04	3.15	1.82	2.16	hypothetical protein
MGG_00220	gene-MGG_00220	0.0426641	-4.55083	0	0	yes	down	118.723	5.70667	115.44	121.93	118.8	6.69	5.48	4.95	NADP-dependent alcohol dehydrogenase 6
MGG_03792	gene-MGG_03792	0.0433169	-4.52893	0.0139471	0.0247229	yes	down	0.406667	0	0.36	0.54	0.32	0	0	0	hypothetical protein
MGG_08617	gene-MGG_08617	0.0445891	-4.48717	0.000694735	0.00147475	yes	down	0.47	0.0233333	0.84	0.15	0.42	0	0	0.07	H(+)/hexose cotransporter 1
MGG_08777	gene-MGG_08777	0.0455153	-4.4575	1.67e-05	4.2e-05	yes	down	0.5	0.0266667	0.47	0.63	0.4	0.08	0	0	hypothetical protein
MGG_08966	gene-MGG_08966	0.0455877	-4.45521	0.0294108	0.0495295	yes	down	0.25	0	0	0.48	0.27	0	0	0	cuticle-degrading protease
MGG_10330	gene-MGG_10330	0.0472314	-4.40411	0	0	yes	down	158.523	8.39	159.7	160.47	155.4	8.47	8.57	8.13	glutamate carboxypeptidase 2
MGG_17479	gene-MGG_17479	0.0481985	-4.37487	0.0245347	0.0418218	yes	down	1.12333	0	1.69	0.35	1.33	0	0	0	hypothetical protein
MGG_05988	gene-MGG_05988	0.0509909	-4.29362	5.36e-188	2.9e-186	yes	down	39.64	2.25333	41.1	37.79	40.03	2.13	2.12	2.51	lipid phosphate phosphatase 2
MGG_01300	gene-MGG_01300	0.0516602	-4.2748	0	0	yes	down	502.903	29.03	479.55	532.8	496.36	31.03	26.21	29.85	L-galactonate dehydratase
MGG_07625	gene-MGG_07625	0.0519475	-4.2668	0	0	yes	down	277.287	16.1833	273.21	274.81	283.84	18.33	15.5	14.72	hypothetical protein
MGG_02531	gene-MGG_02531	0.0528653	-4.24153	5.56e-275	5.13e-273	yes	down	33.23	1.95333	31.17	34.83	33.69	1.99	1.61	2.26	minor extracellular protease vpr
MGG_02559	gene-MGG_02559	0.0537418	-4.21781	2.25e-11	8.42e-11	yes	down	2.34333	0.143333	2.32	2.06	2.65	0	0.34	0.09	MOSC domain-containing protein
MGG_02988	gene-MGG_02988	0.0549454	-4.18586	3.45e-52	4.24e-51	yes	down	7.69333	0.47	8.6	7.44	7.04	0.37	0.37	0.67	hypothetical protein
MGG_10469	gene-MGG_10469	0.0551445	-4.18064	3.04e-27	2.12e-26	yes	down	3.03333	0.186667	2.92	3.35	2.83	0.16	0.27	0.13	hypothetical protein
MGG_08526	gene-MGG_08526	0.0553751	-4.17462	0.0102745	0.0186009	yes	down	0.233333	0.0133333	0.14	0.16	0.4	0	0	0.04	hypothetical protein
MGG_08074	gene-MGG_08074	0.0555528	-4.17	0	0	yes	down	438.963	24.8533	468.21	430.25	418.43	24.11	24.92	25.53	NADP-specific glutamate dehydrogenase
MGG_04847	gene-MGG_04847	0.057423	-4.12223	0	0	yes	down	150.423	9.69333	147.63	150.12	153.52	9.87	10.3	8.91	peptidase M14
MGG_07883	gene-MGG_07883	0.0575298	-4.11955	2.12e-11	7.97e-11	yes	down	3.05667	0.22	3.11	2.72	3.34	0.3	0.22	0.14	sorbose reductase sou1
MGG_17792	gene-MGG_17792	0.058171	-4.10356	9.28e-78	1.75e-76	yes	down	124.82	8.14333	119.96	125.34	129.16	6.73	9.58	8.12	hypothetical protein
MGG_12505	gene-MGG_12505	0.0582306	-4.10208	2.12e-17	1.05e-16	yes	down	4.62	0.3	4.09	6.26	3.51	0.19	0.45	0.26	alpha-ketoglutarate-dependent taurine dioxygenase
MGG_01922	gene-MGG_01922	0.0585288	-4.09471	1.25e-61	1.83e-60	yes	down	15.7333	1.02333	14.99	15.88	16.33	1.09	0.8	1.18	polysaccharide deacetylase
MGG_00771	gene-MGG_00771	0.0591159	-4.08031	0	0	yes	down	253.373	16.8567	238.28	263.46	258.38	20.11	16.17	14.29	5-oxoprolinase
MGG_00678	gene-MGG_00678	0.0591526	-4.07941	0	0	yes	down	568.14	37.61	575.44	563.81	565.17	35.38	39.52	37.93	hypothetical protein
MGG_07624	gene-MGG_07624	0.0611372	-4.03181	1.36e-13	5.71e-13	yes	down	5.82	0.263333	6.79	5.41	5.26	0.22	0.14	0.43	hypothetical protein
MGG_10533	gene-MGG_10533	0.0620421	-4.01061	0	0	yes	down	624.397	43.2633	631.25	627.81	614.13	39.06	44.44	46.29	agmatinase 1
MGG_06588	gene-MGG_06588	0.0644295	-3.95613	2.05e-69	3.43e-68	yes	down	11.08	0.786667	10.63	11.45	11.16	0.78	0.46	1.12	trichodiene oxygenase
MGG_16555	gene-MGG_16555	0.0648583	-3.94656	0.000478546	0.0010334	yes	down	0.953333	0.0766667	0.61	1.48	0.77	0	0.23	0	hypothetical protein
MGG_05406	gene-MGG_05406	0.0653729	-3.93516	1.4e-263	1.21e-261	yes	down	1119.65	87.9367	922.37	1297.45	1139.14	94.91	88.01	80.89	hypothetical protein
MGG_13765	gene-MGG_13765	0.0660033	-3.92132	0	0	yes	down	298.46	22.0633	310.19	291.22	293.97	22.16	21.91	22.12	hypothetical protein
MGG_10942	gene-MGG_10942	0.0670864	-3.89784	6.95e-44	7.22e-43	yes	down	5.19	0.393333	4.79	5.7	5.08	0.35	0.52	0.31	peptidase
MGG_03831	gene-MGG_03831	0.0673281	-3.89265	1.68e-25	1.1e-24	yes	down	4.10333	0.316667	3.68	3.98	4.65	0.41	0.35	0.19	hypothetical protein
MGG_05554	gene-MGG_05554	0.0706244	-3.82369	2.21e-12	8.75e-12	yes	down	2.30667	0.193333	2.58	2.52	1.82	0.11	0.32	0.15	hypothetical protein
MGG_17557	gene-MGG_17557	0.0726154	-3.78358	7.32e-08	2.23e-07	yes	down	1.65	0.123333	1.64	2.41	0.9	0.31	0	0.06	hypothetical protein
MGG_07577	gene-MGG_07577	0.0730845	-3.77429	1.01e-09	3.44e-09	yes	down	1.53333	0.12	1.31	1.94	1.35	0.08	0.11	0.17	hypothetical protein
MGG_02290	gene-MGG_02290	0.0742086	-3.75227	2.48e-07	7.26e-07	yes	down	2.37	0.196667	2.35	2.49	2.27	0.18	0.26	0.15	hypothetical protein
MGG_17436	gene-MGG_17436	0.0743336	-3.74984	0.0187219	0.0324871	yes	down	13.5	1.12333	12.61	12.81	15.08	2.41	0	0.96	hypothetical protein
MGG_02168	gene-MGG_02168	0.0761344	-3.71531	1e-12	4.04e-12	yes	down	3.40333	0.286667	3.37	3.67	3.17	0.2	0.32	0.34	hypothetical protein
MGG_04099	gene-MGG_04099	0.0790324	-3.66141	0	0	yes	down	133.567	11.7467	135.52	136.89	128.29	10.28	11.93	13.03	allantoate permease
MGG_14232	gene-MGG_14232	0.0806023	-3.63304	1.06e-212	7.1e-211	yes	down	36.0067	3.28333	32.5	37.57	37.95	4.04	3.11	2.7	nitrate reductase 1
MGG_10614	gene-MGG_10614	0.0820412	-3.60751	0.00172246	0.00346646	yes	down	1.28	0.11	1.09	1.69	1.06	0	0.12	0.21	isoflavone reductase
MGG_14061	gene-MGG_14061	0.0834125	-3.58359	2.41e-251	1.9e-249	yes	down	56.5533	5.27333	53.94	60.61	55.11	5.36	5.27	5.19	oxalate decarboxylase oxdD
MGG_01186	gene-MGG_01186	0.0836348	-3.57975	1.49e-80	2.96e-79	yes	down	26.33	2.41	30.49	28.54	19.96	2.98	1.97	2.28	hypothetical protein
MGG_05798	gene-MGG_05798	0.083991	-3.57362	3.56e-06	9.49e-06	yes	down	2.06667	0.2	2.37	1.93	1.9	0.45	0	0.15	hypothetical protein
MGG_02987	gene-MGG_02987	0.0842326	-3.56948	5.88e-88	1.3e-86	yes	down	18.5	1.72667	19.16	19.71	16.63	1.58	1.63	1.97	para-nitrobenzyl esterase
MGG_12175	gene-MGG_12175	0.0842693	-3.56885	2.41e-106	6.55e-105	yes	down	230.31	21.7433	188.8	262.74	239.39	25.83	20.93	18.47	gramicidin S synthetase 1
MGG_03764	gene-MGG_03764	0.08533	-3.5508	1.02e-24	6.56e-24	yes	down	5.34667	0.513333	6.38	4.1	5.56	0.34	0.78	0.42	salicylate hydroxylase
MGG_05565	gene-MGG_05565	0.0856783	-3.54493	1.7e-53	2.15e-52	yes	down	18.5967	1.79667	18.26	17.87	19.66	2	1.73	1.66	hypothetical protein
MGG_06799	gene-MGG_06799	0.087857	-3.5087	0	0	yes	down	321.453	31.4867	308.19	327.48	328.69	29.51	33.59	31.36	hypothetical protein
MGG_15990	gene-MGG_15990	0.0886267	-3.49612	2.08e-192	1.2e-190	yes	down	51.2533	5.09	52.89	51.76	49.11	5.36	4.6	5.31	hypothetical protein
MGG_15250	gene-MGG_15250	0.0889252	-3.49126	4.18e-48	4.72e-47	yes	down	10.4333	1.04667	10.59	9.82	10.89	1.47	0.7	0.97	QA-X
MGG_08446	gene-MGG_08446	0.0890721	-3.48888	7.1e-114	2.08e-112	yes	down	22.2667	2.23	21.49	23.66	21.65	2.71	1.96	2.02	sugar transporter
MGG_00246	gene-MGG_00246	0.0904826	-3.46622	2.23e-93	5.3e-92	yes	down	28.46	2.87333	32.69	26.99	25.7	2.56	2.91	3.15	NADP-dependent alcohol dehydrogenase 6
MGG_16926	gene-MGG_16926	0.0921512	-3.43985	1.48e-23	9.16e-23	yes	down	5.93667	0.61	5.9	6.84	5.07	0.44	0.81	0.58	hypothetical protein
MGG_16692	gene-MGG_16692	0.0938796	-3.41304	2.47e-08	7.77e-08	yes	down	51.9633	5.54	45.33	62.22	48.34	0	8.19	8.43	hypothetical protein
MGG_14052	gene-MGG_14052	0.0944799	-3.40385	2.86e-53	3.6e-52	yes	down	44.21	4.66333	48.67	39.04	44.92	3.93	4.8	5.26	hypothetical protein
MGG_03593	gene-MGG_03593	0.0946311	-3.40154	0	0	yes	down	1505.39	153.903	1517.57	1512.57	1486.04	156.13	154.73	150.85	hypothetical protein
MGG_06777	gene-MGG_06777	0.0951143	-3.39419	1.49e-31	1.16e-30	yes	down	6.48333	0.693333	6.57	7.38	5.5	0.92	0.54	0.62	sugar transporter STL1
MGG_17595	gene-MGG_17595	0.0966496	-3.37109	0	0	yes	down	321.517	34.84	319.39	321.69	323.47	34.87	36.65	33	hypothetical protein
MGG_01863	gene-MGG_01863	0.0970902	-3.36453	4.64e-152	1.95e-150	yes	down	34.9833	3.79	32.89	34.11	37.95	3.8	3.58	3.99	aminopeptidase Y
MGG_05066	gene-MGG_05066	0.0977801	-3.35432	2.28e-119	6.99e-118	yes	down	46.0033	5.01	44.66	45.72	47.63	4.69	5.25	5.09	HpcH/HpaI aldolase
MGG_16399	gene-MGG_16399	0.0979842	-3.35131	0.000151658	0.000345336	yes	down	2.15667	0.25	1.9	0.93	3.64	0.19	0.19	0.37	hypothetical protein
MGG_03847	gene-MGG_03847	0.0991431	-3.33434	3.84e-70	6.51e-69	yes	down	35.4867	3.92	37.03	34.1	35.33	4.16	3.07	4.53	hypothetical protein
MGG_13578	gene-MGG_13578	0.0996084	-3.32759	0.0188969	0.0327747	yes	down	4.37667	0.47	4.71	7.43	0.99	0.91	0	0.5	sulphydryl oxidase
MGG_02275	gene-MGG_02275	0.100973	-3.30796	0	0	yes	down	378.557	42.76	381.59	385.35	368.73	39.97	45.04	43.27	endoprotease
MGG_15899	gene-MGG_15899	0.101109	-3.30601	3.74e-05	9.07e-05	yes	down	154.817	25.43	164.43	139.69	160.33	9.26	8.93	58.1	hypothetical protein
MGG_02921	gene-MGG_02921	0.102745	-3.28285	2.91e-190	1.61e-188	yes	down	102.02	11.72	104.75	99.11	102.2	12.77	9.9	12.49	hypothetical protein
MGG_17677	gene-MGG_17677	0.103757	-3.26872	0	0	yes	down	965.907	109.343	964.54	975.71	957.47	112.55	107.14	108.34	hypothetical protein
MGG_01390	gene-MGG_01390	0.104024	-3.26501	1.34e-48	1.53e-47	yes	down	9.28	1	8.7	9.41	9.73	1.06	0.71	1.23	MFS hexose transporter
MGG_02812	gene-MGG_02812	0.104879	-3.2532	4.04e-201	2.47e-199	yes	down	160.263	27.3333	158.04	158.74	164.01	24.21	28.92	28.87	1-aminocyclopropane-1-carboxylate deaminase
MGG_05058	gene-MGG_05058	0.105587	-3.2435	0.00140546	0.00286213	yes	down	3032.92	1065.42	3211.28	2650.39	3237.09	751.17	1194.88	1250.2	hypothetical protein
MGG_09015	gene-MGG_09015	0.106803	-3.22698	0	0	yes	down	655.647	78.1933	656.13	662.86	647.95	76.73	73.34	84.51	hypothetical protein
MGG_06862	gene-MGG_06862	0.107252	-3.22092	1.62e-135	5.86e-134	yes	down	19.7267	2.40667	19.48	18.64	21.06	2.54	2.22	2.46	late embryogenesis abundant protein
MGG_15950	gene-MGG_15950	0.108082	-3.2098	2.23e-233	1.64e-231	yes	down	47.38	3.52333	47.24	51.95	42.95	3.63	3.38	3.56	hypothetical protein
MGG_05387	gene-MGG_05387	0.109073	-3.19663	0.00305046	0.00594701	yes	down	1.79	0.12	1.89	0.77	2.71	0	0.1	0.26	hypothetical protein
MGG_09352	gene-MGG_09352	0.109421	-3.19204	0	0	yes	down	435.467	53.4833	403.1	449.16	454.14	59.43	53.15	47.87	minor extracellular protease vpr
MGG_07851	gene-MGG_07851	0.110082	-3.18334	0.00504398	0.0095331	yes	down	0.443333	0.05	0.49	0.72	0.12	0	0.04	0.11	hypothetical protein
MGG_03115	gene-MGG_03115	0.110747	-3.17466	0	0	yes	down	78.2567	9.68333	79.32	77.69	77.76	8.97	10.02	10.06	hypothetical protein
MGG_13518	gene-MGG_13518	0.1115	-3.16489	4.12e-160	1.85e-158	yes	down	66.27	8.27	68.86	58.21	71.74	7.54	8.94	8.33	sorbose reductase SOU1
MGG_08962	gene-MGG_08962	0.112712	-3.14929	3.97e-42	3.95e-41	yes	down	19.71	2.47	18.32	19.01	21.8	2.12	2.49	2.8	hypothetical protein
MGG_04329	gene-MGG_04329	0.113757	-3.13598	0	0	yes	down	514.983	65.6233	527.35	529.99	487.61	71.32	61.17	64.38	hypothetical protein
MGG_10105	gene-MGG_10105	0.114522	-3.1263	4.62e-05	0.000110975	yes	down	1.69333	0.223333	1.43	1.31	2.34	0.35	0.25	0.07	hypothetical protein
MGG_09019	gene-MGG_09019	0.11458	-3.12557	0.0121438	0.0217404	yes	down	0.94	0.123333	1.01	0.49	1.32	0.26	0	0.11	hypothetical protein
MGG_05479	gene-MGG_05479	0.115566	-3.11321	1.15e-48	1.31e-47	yes	down	10.2067	1.31667	10.93	9.26	10.43	1.44	1	1.51	xylosidase/arabinosidase
MGG_02529	gene-MGG_02529	0.116442	-3.10232	4.23e-22	2.49e-21	yes	down	5.11333	0.666667	4.35	4.83	6.16	0.4	1.07	0.53	hypothetical protein
MGG_15991	gene-MGG_15991	0.11654	-3.10111	8.7e-59	1.22e-57	yes	down	8.95	1.24333	6.8	9.96	10.09	1.23	1.33	1.17	hypothetical protein
MGG_13895	gene-MGG_13895	0.118272	-3.07982	3.33e-10	1.17e-09	yes	down	3.00333	0.396667	2.7	3.12	3.19	0.41	0.38	0.4	fructose-bisphosphate aldolase
MGG_03465	gene-MGG_03465	0.11875	-3.074	1.32e-89	2.99e-88	yes	down	16.9833	2.26333	15.35	17.61	17.99	2.21	2.67	1.91	hypothetical protein
MGG_04897	gene-MGG_04897	0.118768	-3.07378	6.5e-286	6.21e-284	yes	down	55.01	7.34333	55.36	55.22	54.45	7.73	7.68	6.62	hypothetical protein
MGG_07629	gene-MGG_07629	0.119826	-3.06099	4.67e-244	3.62e-242	yes	down	51.4667	6.90333	52.47	51.33	50.6	6.85	6.97	6.89	hypothetical protein
MGG_11871	gene-MGG_11871	0.119957	-3.05941	0	0	yes	down	188.197	25.24	191.05	193.91	179.63	25.1	24.54	26.08	allantoicase
MGG_09076	gene-MGG_09076	0.120518	-3.05268	2.81e-207	1.82e-205	yes	down	81.0033	16.13	80.27	84.98	77.76	13.51	16.98	17.9	hypothetical protein
MGG_10439	gene-MGG_10439	0.121358	-3.04266	5.36e-15	2.39e-14	yes	down	1.86	0.25	2.08	1.52	1.98	0.15	0.34	0.26	MFS transporter
MGG_07787	gene-MGG_07787	0.122207	-3.0326	6.58e-46	7.08e-45	yes	down	7.10667	0.976667	6.68	7.64	7	0.97	1.14	0.82	hypothetical protein
MGG_09061	gene-MGG_09061	0.122667	-3.02718	6.88e-16	3.19e-15	yes	down	2.36667	0.316667	2.06	2.24	2.8	0.29	0.21	0.45	hypothetical protein
MGG_07933	gene-MGG_07933	0.123071	-3.02244	1.27e-160	5.78e-159	yes	down	38.8067	5.34333	41.47	38.62	36.33	5.64	4.63	5.76	dihydrodipicolinate synthase
MGG_15415	gene-MGG_15415	0.123114	-3.02193	1.51e-09	5.1e-09	yes	down	5.09333	0.706667	5.23	3.97	6.08	1.02	0.43	0.67	hypothetical protein
MGG_05098	gene-MGG_05098	0.123834	-3.01352	4.67e-130	1.6e-128	yes	down	27.3267	3.79333	27.55	26.18	28.25	3.56	4.14	3.68	galactose-1-phosphate uridylyltransferase
MGG_14892	gene-MGG_14892	0.123936	-3.01234	0	0	yes	down	326.95	44.3933	310.41	327.23	343.21	46.53	50.37	36.28	hypothetical protein
MGG_06691	gene-MGG_06691	0.123984	-3.01178	0	0	yes	down	661.323	91.66	649.7	663.72	670.55	86.57	93.24	95.17	4-hydroxyphenylpyruvate dioxygenase
MGG_04573	gene-MGG_04573	0.12556	-2.99355	0.0185889	0.0322722	yes	down	1.05	0.143333	0.62	1.36	1.17	0	0.3	0.13	hypothetical protein
MGG_08527	gene-MGG_08527	0.126924	-2.97796	1.55e-10	5.55e-10	yes	down	3.68333	0.523333	4.63	3.03	3.39	0.83	0.05	0.69	hypothetical protein
MGG_08670	gene-MGG_08670	0.127034	-2.97671	4.75e-06	1.26e-05	yes	down	1.28667	0.18	1.64	1.35	0.87	0.2	0.09	0.25	choline transporter
MGG_08360	gene-MGG_08360	0.128766	-2.95718	3.92e-75	7.07e-74	yes	down	75.9033	10.92	80.5	81.21	66	11.48	9.89	11.39	hypothetical protein
MGG_00703	gene-MGG_00703	0.128908	-2.95559	2.5e-05	6.15e-05	yes	down	11.72	1.70333	12.25	18.96	3.95	2.29	1.9	0.92	MAS3 protein
MGG_10360	gene-MGG_10360	0.128963	-2.95497	2.35e-37	2.11e-36	yes	down	14.8033	2.11	14.51	15.17	14.73	1.79	1.8	2.74	haloacid dehalogenase
MGG_05539	gene-MGG_05539	0.129539	-2.94854	1.11e-15	5.11e-15	yes	down	3.79333	0.56	4.41	3.08	3.89	0.74	0.56	0.38	carboxypeptidase 2
MGG_15667	gene-MGG_15667	0.129682	-2.94695	3.69e-14	1.59e-13	yes	down	23.5867	3.41	23.25	23.23	24.28	1.72	4.62	3.89	hypothetical protein
MGG_08548	gene-MGG_08548	0.131363	-2.92836	6.61e-55	8.63e-54	yes	down	17.7333	2.58667	13.61	18.46	21.13	2.43	2.61	2.72	proline-specific permease
MGG_09856	gene-MGG_09856	0.131748	-2.92415	7.81e-06	2.02e-05	yes	down	0.68	0.0966667	0.62	0.84	0.58	0.03	0.15	0.11	dihydroxyacetone synthase
MGG_03461	gene-MGG_03461	0.132313	-2.91798	0.0010601	0.00219246	yes	down	1.63333	0.216667	1.81	1.7	1.39	0	0	0.65	chitin deacetylase
MGG_10440	gene-MGG_10440	0.132553	-2.91536	4.1e-117	1.23e-115	yes	down	162.473	24.1267	173.7	151.36	162.36	18.79	28.5	25.09	endoribonuclease L-PSP
MGG_10331	gene-MGG_10331	0.133552	-2.90453	4.93e-28	3.51e-27	yes	down	10.4067	1.18667	11.42	10.31	9.49	1.31	1.12	1.13	hypothetical protein
MGG_14767	gene-MGG_14767	0.133666	-2.90329	0	0	yes	down	55.0467	8.27667	53.35	55.68	56.11	9.35	8.39	7.09	non-ribosomal peptide synthetase
MGG_11870	gene-MGG_11870	0.134636	-2.89287	8.82e-201	5.35e-199	yes	down	40.04	6.03	40.17	40.33	39.62	5.56	6.89	5.64	hypothetical protein
MGG_00050	gene-MGG_00050	0.135212	-2.8867	1.58e-217	1.09e-215	yes	down	45.55	6.93	42.71	45.84	48.1	7.07	8.09	5.63	hypothetical protein
MGG_13376	gene-MGG_13376	0.136213	-2.87606	2.25e-06	6.12e-06	yes	down	1.48333	0.23	1.64	1.1	1.71	0.4	0.05	0.24	hypothetical protein
MGG_07620	gene-MGG_07620	0.136954	-2.86823	5.25e-09	1.72e-08	yes	down	1.36333	0.216667	1.41	1.1	1.58	0.31	0.29	0.05	L-amino-acid oxidase
MGG_12523	gene-MGG_12523	0.13927	-2.84404	3.63e-259	2.99e-257	yes	down	55.68	8.72667	55.33	57.1	54.61	9.92	8.73	7.53	adhesin protein Mad1
MGG_07005	gene-MGG_07005	0.139525	-2.84141	1.12e-304	1.25e-302	yes	down	342.623	53.7333	361.85	340.27	325.75	50.77	55.55	54.88	hypothetical protein
MGG_01906	gene-MGG_01906	0.139972	-2.83678	5.3e-25	3.42e-24	yes	down	8.62	1.36667	8.52	8.27	9.07	1.32	1.89	0.89	nicotianamine synthase 3
MGG_12424	gene-MGG_12424	0.140424	-2.83214	4.24e-96	1.05e-94	yes	down	13.5133	2.13	13.9	13.11	13.53	2.12	2.09	2.18	C6 transcription factor
MGG_08535	gene-MGG_08535	0.141234	-2.82384	6.36e-34	5.25e-33	yes	down	17.0967	2.66	17.19	19.5	14.6	1.51	2.93	3.54	hypothetical protein
MGG_02187	gene-MGG_02187	0.141236	-2.82382	0.00580306	0.0108787	yes	down	0.246667	0.04	0.38	0.17	0.19	0.03	0.07	0.02	hypothetical protein
MGG_02169	gene-MGG_02169	0.143968	-2.79618	4.46e-41	4.33e-40	yes	down	10.9067	1.75667	10.69	10.64	11.39	1.81	1.59	1.87	hypothetical protein
MGG_07957	gene-MGG_07957	0.14538	-2.7821	1.74e-30	1.32e-29	yes	down	6.61	1.06667	6.66	6.59	6.58	0.87	1.05	1.28	uridine permease
MGG_16382	gene-MGG_16382	0.145671	-2.77921	6.45e-20	3.53e-19	yes	down	12.0667	1.96	12.66	13.37	10.17	2.06	1.64	2.18	hypothetical protein
MGG_07935	gene-MGG_07935	0.145717	-2.77876	1.89e-119	5.8e-118	yes	down	43.4533	4.76667	44.04	44.98	41.34	5.69	4.32	4.29	galactonate dehydratase
MGG_09250	gene-MGG_09250	0.145808	-2.77786	1.36e-54	1.76e-53	yes	down	16.54	2.71	18.72	16.39	14.51	3.24	2.1	2.79	gamma-butyrobetaine dioxygenase
MGG_08108	gene-MGG_08108	0.145903	-2.77692	1.39e-210	9.24e-209	yes	down	325.387	52.9733	334.52	318.97	322.67	50.59	49.46	58.87	ureidoglycolate hydrolase
MGG_02199	gene-MGG_02199	0.146017	-2.77579	1.95e-88	4.37e-87	yes	down	48.3	7.86667	48.33	51.64	44.93	7.01	8.3	8.29	hypothetical protein
MGG_15184	gene-MGG_15184	0.146057	-2.7754	1.42e-06	3.9e-06	yes	down	1.43333	0.233333	1.34	1.91	1.05	0.19	0.27	0.24	peptidase U34
MGG_17680	gene-MGG_17680	0.146234	-2.77365	2.24e-202	1.4e-200	yes	down	134.9	73.0833	126.63	140.33	137.74	69.86	76.47	72.92	hypothetical protein
MGG_11575	gene-MGG_11575	0.14628	-2.7732	1.35e-109	3.81e-108	yes	down	94.38	15.5233	98.05	86.24	98.85	13.86	18.68	14.03	hypothetical protein
MGG_17223	gene-MGG_17223	0.146426	-2.77176	0.000436281	0.000946941	yes	down	2.67	0.466667	3.72	0.83	3.46	0.36	0.7	0.34	hypothetical protein
MGG_00272	gene-MGG_00272	0.147263	-2.76354	1.25e-20	7.01e-20	yes	down	9.85667	2.96	6.98	12.46	10.13	3.11	3.02	2.75	hypothetical protein
MGG_00040	gene-MGG_00040	0.147394	-2.76226	7.18e-140	2.77e-138	yes	down	27.7533	4.64667	26.98	29.97	26.31	4.94	4.53	4.47	high-affinity glucose transporter ght2
MGG_06542	gene-MGG_06542	0.147605	-2.76018	1.87e-291	1.87e-289	yes	down	296.36	41.5633	323.35	281.29	284.44	42.22	42.18	40.29	N amino acid transport system protein
MGG_02451	gene-MGG_02451	0.148134	-2.75502	1.56e-204	9.99e-203	yes	down	170.587	28.28	175.58	171.13	165.05	29.1	27.02	28.72	cyanate hydratase
MGG_06523	gene-MGG_06523	0.148358	-2.75285	1.95e-17	9.65e-17	yes	down	3.93	0.66	2.99	3.67	5.13	0.68	0.71	0.59	hypothetical protein
MGG_18137	gene-MGG_18137	0.148607	-2.75043	4.37e-05	0.000105274	yes	down	0.626667	0.106667	0.5	0.5	0.88	0.14	0.13	0.05	hypothetical protein
MGG_07958	gene-MGG_07958	0.148641	-2.75009	3.76e-57	5.09e-56	yes	down	18.63	2.99667	19.04	19.89	16.96	2.9	3.49	2.6	naringenin,2-oxoglutarate 3-dioxygenase
MGG_05608	gene-MGG_05608	0.149378	-2.74296	2.31e-197	1.38e-195	yes	down	164.82	27.5867	161.88	169.15	163.43	26.49	29.73	26.54	hypothetical protein
MGG_09383	gene-MGG_09383	0.150319	-2.73391	6.27e-171	3.08e-169	yes	down	38.4133	6.44667	35.21	39.4	40.63	7.39	6.14	5.81	NIMA-interacting protein TinC
MGG_08265	gene-MGG_08265	0.150464	-2.73251	1.62e-32	1.28e-31	yes	down	7.15667	1.20333	5.62	9.15	6.7	1.28	1.15	1.18	hypothetical protein
MGG_00614	gene-MGG_00614	0.150688	-2.73036	0.000299083	0.00066022	yes	down	7.84667	1.36	12.45	4.69	6.4	1.24	1.71	1.13	hypothetical protein
MGG_15873	gene-MGG_15873	0.151447	-2.72312	0.000695299	0.00147565	yes	down	5.91667	1.01667	5.95	4.74	7.06	1.16	1.19	0.7	hypothetical protein
MGG_05833	gene-MGG_05833	0.151843	-2.71934	0.00918115	0.0167414	yes	down	0.353333	0.06	0.4	0.15	0.51	0.04	0.07	0.07	vacuolar basic amino acid transporter 1
MGG_07627	gene-MGG_07627	0.152778	-2.71049	2.39e-99	6.06e-98	yes	down	39.53	6.73667	38.6	37.6	42.39	6.65	6.22	7.34	homoserine acetyltransferase
MGG_10000	gene-MGG_10000	0.153246	-2.70608	2.09e-93	4.98e-92	yes	down	32.5367	6.6	32.35	30.4	34.86	7.47	5.78	6.55	hypothetical protein
MGG_17307	gene-MGG_17307	0.155176	-2.68802	3.13e-05	7.63e-05	yes	down	1.03667	0.19	0.81	1.11	1.19	0.25	0.23	0.09	hypothetical protein
MGG_06011	gene-MGG_06011	0.155664	-2.68349	0	0	yes	down	1399.06	243.57	1377.23	1434.35	1385.61	231.28	249.51	249.92	S-(hydroxymethyl)glutathione dehydrogenase
MGG_00270	gene-MGG_00270	0.155903	-2.68127	3.06e-143	1.21e-141	yes	down	71.41	12.4367	70.78	70.29	73.16	11.23	13.43	12.65	zinc-containing alcohol dehydrogenase
MGG_15936	gene-MGG_15936	0.156004	-2.68035	3.19e-23	1.95e-22	yes	down	8.69	1.52667	10.65	7.42	8	1.38	1.82	1.38	hypothetical protein
MGG_00942	gene-MGG_00942	0.156377	-2.6769	2.38e-300	2.45e-298	yes	down	333.503	58.3533	346.7	326.69	327.12	56.35	58.12	60.59	branched-chain-amino-acid aminotransferase
MGG_00940	gene-MGG_00940	0.156552	-2.67528	4.91e-198	2.94e-196	yes	down	72.04	12.6	71.31	75.74	69.07	12.26	12.55	12.99	tripeptidyl-peptidase 1
MGG_03126	gene-MGG_03126	0.158705	-2.65558	1.99e-129	6.77e-128	yes	down	36.5367	6.35667	37.64	35.44	36.53	7.34	5.87	5.86	2,4-dichlorophenol 6-monooxygenase
MGG_14937	gene-MGG_14937	0.15899	-2.65299	7.45e-221	5.27e-219	yes	down	135.273	22.6567	127.14	133.18	145.5	21.65	21.31	25.01	proline permease
MGG_03900	gene-MGG_03900	0.159163	-2.65143	0	0	yes	down	133.27	23.8033	132.47	131.13	136.21	24.88	24.35	22.18	aldehyde dehydrogenase
MGG_10532	gene-MGG_10532	0.160135	-2.64264	2.29e-156	9.98e-155	yes	down	105.627	18.93	111.51	105.53	99.84	20.17	17.06	19.56	necrosis and ethylene inducing peptide
MGG_09351	gene-MGG_09351	0.160685	-2.6377	9.07e-30	6.77e-29	yes	down	21.07	5.98333	18.99	25.18	19.04	3.8	2.87	11.28	aspergillopepsin-F
MGG_11813	gene-MGG_11813	0.161211	-2.63298	2.2e-150	9.02e-149	yes	down	136.72	22.4533	135.69	129.24	145.23	21.94	26.45	18.97	hypothetical protein
MGG_05599	gene-MGG_05599	0.161859	-2.62719	4.48e-210	2.95e-208	yes	down	42.7567	7.74333	40.79	42.86	44.62	7.56	7.68	7.99	beta-glucosidase 1
MGG_01921	gene-MGG_01921	0.161878	-2.62702	0.00670677	0.0124519	yes	down	0.72	0.123333	1.34	0.31	0.51	0	0.05	0.32	hypothetical protein
MGG_10252	gene-MGG_10252	0.162696	-2.61975	0	0	yes	down	1839.85	335.063	1848.49	1843.01	1828.05	338.36	339.15	327.68	hypothetical protein
MGG_07850	gene-MGG_07850	0.163419	-2.61335	0.000376839	0.000823309	yes	down	1.94	0.346667	1.19	3.58	1.05	0.19	0.45	0.4	hypothetical protein
MGG_17450	gene-MGG_17450	0.163522	-2.61245	0	0	yes	down	317.713	58.2333	317.14	313.79	322.21	56.1	59.06	59.54	mitochondrial 2-oxoglutarate/malate carrier protein
MGG_01783	gene-MGG_01783	0.163877	-2.60932	6.3e-261	5.35e-259	yes	down	117.747	24.0767	117.8	114.01	121.43	25.16	23.88	23.19	hypothetical protein
MGG_03464	gene-MGG_03464	0.165505	-2.59505	0	0	yes	down	3144.9	582.553	3166.35	3096.48	3171.87	575.06	579.58	593.02	hypothetical protein
MGG_05994	gene-MGG_05994	0.165643	-2.59385	1.9e-178	9.98e-177	yes	down	92.5	17.2733	87.94	91.96	97.6	18.73	19.73	13.36	hypothetical protein
MGG_03375	gene-MGG_03375	0.165713	-2.59324	0	0	yes	down	216.577	40.26	220.87	217.55	211.31	39.3	40.94	40.54	isotrichodermin C-15 hydroxylase
MGG_09817	gene-MGG_09817	0.166699	-2.58468	5.05e-117	1.51e-115	yes	down	21.85	4.06667	19.89	22.95	22.71	3.95	4.15	4.1	minor extracellular protease vpr
MGG_10392	gene-MGG_10392	0.167686	-2.57616	4.66e-06	1.23e-05	yes	down	1.47667	0.273333	0.96	1.42	2.05	0.24	0.22	0.36	CMGC/SRPK protein kinase
MGG_12664	gene-MGG_12664	0.167904	-2.57429	2.07e-22	1.23e-21	yes	down	11.1233	2.07667	11.3	11.21	10.86	2.15	1.57	2.51	hypothetical protein
MGG_08451	gene-MGG_08451	0.167966	-2.57376	0.0144468	0.0255362	yes	down	7.47	1.36	4.01	10.45	7.95	2.42	0.87	0.79	hypothetical protein
MGG_07882	gene-MGG_07882	0.168803	-2.56658	3.26e-38	2.97e-37	yes	down	9.77	1.84333	10.07	10.26	8.98	1.98	1.77	1.78	hypothetical protein
MGG_02355	gene-MGG_02355	0.168843	-2.56624	7.78e-40	7.39e-39	yes	down	21.8067	4.12333	20.87	20.49	24.06	4.84	3.44	4.09	hypothetical protein
MGG_04895	gene-MGG_04895	0.170738	-2.55014	3.26e-162	1.5e-160	yes	down	32.6633	6.09333	32.6	33.37	32.02	6.2	6.51	5.57	isocitrate lyase
MGG_07576	gene-MGG_07576	0.17097	-2.54819	1.46e-76	2.7e-75	yes	down	33.65	6.42333	33.88	31.24	35.83	6.11	6.17	6.99	acetoin(diacetyl) reductase
MGG_03494	gene-MGG_03494	0.171083	-2.54723	0	0	yes	down	431.563	83.8833	431.53	432.33	430.83	83.07	85.64	82.94	aminotransferase
MGG_16403	gene-MGG_16403	0.171823	-2.541	3.04e-305	3.44e-303	yes	down	232.153	44.72	228.15	231.21	237.1	47.68	43.79	42.69	hypothetical protein
MGG_01991	gene-MGG_01991	0.172231	-2.53759	2.96e-63	4.48e-62	yes	down	18.8867	3.61333	20.15	18.46	18.05	3.19	3.56	4.09	betaine aldehyde dehydrogenase
MGG_17847	gene-MGG_17847	0.172325	-2.5368	1.9e-13	7.92e-13	yes	down	2.72	0.516667	2.49	3.64	2.03	0.55	0.46	0.54	hypothetical protein
MGG_02989	gene-MGG_02989	0.173122	-2.53014	4.55e-11	1.68e-10	yes	down	4.37	0.66	5.81	3.5	3.8	1.08	0.5	0.4	hypothetical protein
MGG_15778	gene-MGG_15778	0.173682	-2.52548	0.0110086	0.0198554	yes	down	52.27	11.9633	45.29	45.57	65.95	0	15.74	20.15	hypothetical protein
MGG_02379	gene-MGG_02379	0.174081	-2.52217	1.78e-27	1.25e-26	yes	down	24.5533	4.77333	25.39	25.26	23.01	4.91	4.3	5.11	hypothetical protein
MGG_11750	gene-MGG_11750	0.174695	-2.51709	0	0	yes	down	456.493	89.3767	469.81	442.47	457.2	90.72	89.33	88.08	hypothetical protein
MGG_08737	gene-MGG_08737	0.174978	-2.51475	0.0046084	0.00874879	yes	down	0.423333	0.0866667	0.42	0.43	0.42	0.12	0.11	0.03	feruloyl esterase B
MGG_05317	gene-MGG_05317	0.174983	-2.51471	3.18e-307	3.63e-305	yes	down	243.223	47.6933	239.51	251.38	238.78	48.35	49.39	45.34	S-formylglutathione hydrolase
MGG_04034	gene-MGG_04034	0.175497	-2.51049	0	0	yes	down	5237.43	1024.6	5335.77	5233.41	5143.12	1003.26	1038.65	1031.88	formate dehydrogenase
MGG_00099	gene-MGG_00099	0.175592	-2.5097	1.04e-289	1.02e-287	yes	down	563.87	133.727	552.79	546.42	592.4	152.3	126.08	122.8	hypothetical protein
MGG_09272	gene-MGG_09272	0.175603	-2.50961	4.08e-196	2.4e-194	yes	down	46.9733	9.23667	45.06	45.98	49.88	9.28	9.38	9.05	beta-glucosidase 1
MGG_09601	gene-MGG_09601	0.175901	-2.50717	5.97e-105	1.61e-103	yes	down	36.3367	7.19667	36.96	33.96	38.09	7.31	8.15	6.13	alpha-xylosidase
MGG_17146	gene-MGG_17146	0.176253	-2.50428	6.9e-05	0.000162949	yes	down	2.71	0.52	2.17	3.29	2.67	0.23	0.55	0.78	hypothetical protein
MGG_12548	gene-MGG_12548	0.176829	-2.49957	1.69e-07	5.03e-07	yes	down	2.81	0.57	2.95	3.42	2.06	0.63	0.87	0.21	hypothetical protein
MGG_05030	gene-MGG_05030	0.177213	-2.49644	0	0	yes	down	239.937	47.5567	231.42	243.98	244.41	47.7	50.63	44.34	arrestin
MGG_08342	gene-MGG_08342	0.17769	-2.49256	2.29e-31	1.78e-30	yes	down	10.1767	2.03333	10.81	11.9	7.82	1.98	2.36	1.76	phosphorylcholine phosphatase
MGG_10212	gene-MGG_10212	0.178496	-2.48604	0.00512289	0.00967192	yes	down	0.333333	0.0666667	0.34	0.29	0.37	0.06	0.09	0.05	hypothetical protein
MGG_07816	gene-MGG_07816	0.179557	-2.47748	4.15e-19	2.21e-18	yes	down	6.69667	1.36	6.72	6.79	6.58	1.6	1.49	0.99	hypothetical protein
MGG_04257	gene-MGG_04257	0.179829	-2.4753	1.04e-05	2.67e-05	yes	down	1.08333	0.22	0.95	1.32	0.98	0.2	0.26	0.2	hypothetical protein
MGG_03689	gene-MGG_03689	0.180645	-2.46877	1.14e-17	5.71e-17	yes	down	6.59	1.37667	7.4	7.35	5.02	1.35	1.55	1.23	3-oxoacyl-[acyl-carrier-protein] reductase
MGG_08474	gene-MGG_08474	0.183664	-2.44486	5.53e-129	1.87e-127	yes	down	54.4633	11.1667	52.02	57.91	53.46	11.5	10.21	11.79	Delta(12) fatty acid desaturase
MGG_01454	gene-MGG_01454	0.183792	-2.44385	3.96e-39	3.7e-38	yes	down	9.17	1.88333	8.78	9.21	9.52	1.84	1.86	1.95	hypothetical protein
MGG_07029	gene-MGG_07029	0.183848	-2.44342	0.00177296	0.00356	yes	down	1.06333	0.556667	0.82	1.97	0.4	0.32	0.91	0.44	hypothetical protein
MGG_00985	gene-MGG_00985	0.184084	-2.44156	3.37e-33	2.74e-32	yes	down	11.9267	2.44667	10.83	13.11	11.84	1.77	3.15	2.42	hypothetical protein
MGG_08120	gene-MGG_08120	0.184376	-2.43928	9.77e-36	8.41e-35	yes	down	9.91	2.04667	8.04	11.08	10.61	2.27	2.03	1.84	integral membrane protein
MGG_08985	gene-MGG_08985	0.184954	-2.43476	3.7e-20	2.04e-19	yes	down	2.88333	0.596667	2.68	2.65	3.32	0.58	0.6	0.61	beta-xylosidase
MGG_04869	gene-MGG_04869	0.185834	-2.42792	2.69e-13	1.11e-12	yes	down	12.5233	2.64333	13.6	14.93	9.04	1.41	4.76	1.76	esterase/lipase/thioesterase
MGG_04253	gene-MGG_04253	0.190152	-2.39478	3.38e-29	2.47e-28	yes	down	8.48333	1.79667	7.95	8.89	8.61	2.11	1.27	2.01	hypothetical protein
MGG_07802	gene-MGG_07802	0.190897	-2.38913	8.97e-39	8.31e-38	yes	down	12.1667	2.59667	12.91	12.81	10.78	2.53	2.58	2.68	hypothetical protein
MGG_05829	gene-MGG_05829	0.191369	-2.38557	0.00519073	0.00979303	yes	down	0.426667	0.0933333	0.39	0.4	0.49	0.03	0.22	0.03	hypothetical protein
MGG_07626	gene-MGG_07626	0.191438	-2.38505	0	0	yes	down	761.96	163.427	743.33	754.9	787.65	170.67	160.32	159.29	cytochrome P450 monooxygenase
MGG_01370	gene-MGG_01370	0.192316	-2.37845	9.06e-242	6.97e-240	yes	down	75.1333	16.12	74.62	74.13	76.65	16.38	16.54	15.44	vacuolar protein sorting-associated protein 70
MGG_04211	gene-MGG_04211	0.193726	-2.36791	1.98e-16	9.4e-16	yes	down	10.35	2.26	11.97	10.03	9.05	2.63	2.03	2.12	hypothetical protein
MGG_05140	gene-MGG_05140	0.194201	-2.36437	1.17e-106	3.21e-105	yes	down	132.323	28.7633	145.85	125.55	125.57	29.77	26.03	30.49	hypothetical protein
MGG_10896	gene-MGG_10896	0.194296	-2.36367	2.63e-14	1.14e-13	yes	down	3.66667	0.83	3.11	4.32	3.57	1.07	0.68	0.74	hypothetical protein
MGG_02084	gene-MGG_02084	0.194854	-2.35954	1.54e-91	3.59e-90	yes	down	49.35	10.77	49.22	48.91	49.92	11.94	9.55	10.82	hypothetical protein
MGG_02879	gene-MGG_02879	0.195797	-2.35257	1.66e-67	2.69e-66	yes	down	11.6633	2.55333	10.76	13.52	10.71	2.39	2.71	2.56	hypothetical protein
MGG_03526	gene-MGG_03526	0.196346	-2.34853	1.6e-08	5.08e-08	yes	down	3.32333	0.726667	3.55	4.22	2.2	0.74	0.63	0.81	hypothetical protein
MGG_11574	gene-MGG_11574	0.196371	-2.34834	3.78e-53	4.73e-52	yes	down	32.4667	7.19	31.66	36.12	29.62	8.77	6.84	5.96	agmatinase
MGG_08552	gene-MGG_08552	0.196497	-2.34742	6.01e-202	3.73e-200	yes	down	661.537	145.477	681.25	635.99	667.37	136.53	147.97	151.93	hypothetical protein
MGG_13448	gene-MGG_13448	0.19776	-2.33818	1.86e-103	4.96e-102	yes	down	56.93	12.5767	53.53	60.29	56.97	13.25	11.62	12.86	hypothetical protein
MGG_08890	gene-MGG_08890	0.197923	-2.33699	3.38e-55	4.45e-54	yes	down	13.5433	3.02667	12.58	13.02	15.03	3.55	2.9	2.63	hypothetical protein
MGG_09729	gene-MGG_09729	0.1986	-2.33206	2.63e-267	2.36e-265	yes	down	824.347	184.13	837.94	811.22	823.88	191.79	202.55	158.05	hypothetical protein
MGG_03301	gene-MGG_03301	0.198792	-2.33067	5.6e-252	4.44e-250	yes	down	525.75	117.11	532.89	512.86	531.5	110.39	125.32	115.62	hypothetical protein
MGG_03648	gene-MGG_03648	0.200494	-2.31837	2.82e-07	8.21e-07	yes	down	1.75	0.39	1.68	1.46	2.11	0.35	0.35	0.47	NAD(P)H-dependent D-xylose reductase xyl1
MGG_15888	gene-MGG_15888	0.20086	-2.31574	9.84e-23	5.92e-22	yes	down	6.16	1.39333	4.23	6.75	7.5	1.68	1.38	1.12	hypothetical protein
MGG_10441	gene-MGG_10441	0.202694	-2.30263	6.94e-31	5.32e-30	yes	down	25.4967	5.74667	29.21	24.39	22.89	4.9	5.17	7.17	lipase 2
MGG_20107	gene-MGG_20107	0.203421	-2.29746	2.17e-11	8.13e-11	yes	down	79.5067	17.83	87.99	85.55	64.98	31.27	11.54	10.68	tRNA-OTHER
MGG_03280	gene-MGG_03280	0.203548	-2.29656	5.82e-163	2.71e-161	yes	down	129.053	29.3533	130	129.34	127.82	25.82	31.38	30.86	nitrilase 2
MGG_10265	gene-MGG_10265	0.203927	-2.29388	4.56e-153	1.94e-151	yes	down	171.25	38.9767	174.75	176.42	162.58	35.54	38.8	42.59	hypothetical protein
MGG_09541	gene-MGG_09541	0.205104	-2.28557	8.15e-139	3.09e-137	yes	down	72.29	16.5967	75.59	74.74	66.54	16.58	16.59	16.62	gamma-glutamyltranspeptidase
MGG_10189	gene-MGG_10189	0.2059	-2.27999	1.17e-293	1.19e-291	yes	down	225.797	52.01	230.91	224.34	222.14	54.31	51.74	49.98	beta-glucosidase A
MGG_09668	gene-MGG_09668	0.206018	-2.27915	1.05e-42	1.06e-41	yes	down	12.4433	2.87333	13.19	12.64	11.5	2.6	3.25	2.77	gut esterase 1
MGG_13963	gene-MGG_13963	0.206766	-2.27393	2.78e-303	3.05e-301	yes	down	567.63	131.25	542.71	580.28	579.9	132	128.07	133.68	aromatic and neutral aliphatic amino acid permease
MGG_10076	gene-MGG_10076	0.208368	-2.2628	6.99e-58	9.57e-57	yes	down	34.7467	8.09333	36.44	35.81	31.99	9.1	6.53	8.65	hypothetical protein
MGG_17923	gene-MGG_17923	0.208886	-2.25922	0.0215479	0.0370159	yes	down	5.62667	1.32333	8.83	4.18	3.87	2.84	0.6	0.53	hypothetical protein
MGG_16836	gene-MGG_16836	0.209526	-2.2548	3.47e-129	1.18e-127	yes	down	282.28	66.06	292.46	281.62	272.76	67.75	59.16	71.27	hypothetical protein
MGG_13308	gene-MGG_13308	0.209536	-2.25473	7.58e-53	9.43e-52	yes	down	16.0533	3.74	15.75	16.09	16.32	3.11	4.2	3.91	guanine deaminase
MGG_16194	gene-MGG_16194	0.210555	-2.24773	1.87e-18	9.66e-18	yes	down	16.8133	3.97333	20.28	12.88	17.28	4.15	3.43	4.34	hypothetical protein
MGG_04927	gene-MGG_04927	0.211213	-2.24323	1.57e-260	1.33e-258	yes	down	225.23	53.1733	231.41	223.32	220.96	51.75	54.6	53.17	high-affinity nicotinic acid transporter
MGG_07419	gene-MGG_07419	0.211457	-2.24156	7.22e-67	1.15e-65	yes	down	25.55	6.05	26.1	28.14	22.41	6.84	5.01	6.3	hypothetical protein
MGG_10215	gene-MGG_10215	0.212648	-2.23346	6.38e-55	8.34e-54	yes	down	21.07	4.98	21.95	21.44	19.82	5.41	4.66	4.87	hypothetical protein
MGG_05092	gene-MGG_05092	0.213349	-2.22871	1.15e-180	6.08e-179	yes	down	118.993	28.5333	122.07	114.05	120.86	29.25	27.42	28.93	hypothetical protein
MGG_10359	gene-MGG_10359	0.215225	-2.21609	3.06e-26	2.06e-25	yes	down	12.4167	2.99	12.52	12.16	12.57	2.88	3.05	3.04	hypothetical protein
MGG_04802	gene-MGG_04802	0.216378	-2.20837	2.95e-60	4.23e-59	yes	down	21.6667	5.23	19.38	22.41	23.21	4.6	5.77	5.32	periodic tryptophan protein 1
MGG_10865	gene-MGG_10865	0.216645	-2.2066	6.14e-228	4.44e-226	yes	down	227.007	55.2267	232.68	219.16	229.18	57.2	59.13	49.35	hypothetical protein
MGG_16418	gene-MGG_16418	0.216813	-2.20548	4.82e-163	2.27e-161	yes	down	167.523	40.6967	169.26	162.88	170.43	38.26	43.84	39.99	hypothetical protein
MGG_18046	gene-MGG_18046	0.216995	-2.20427	3.45e-07	9.97e-07	yes	down	1.37667	0.333333	1.71	1.3	1.12	0.29	0.25	0.46	hypothetical protein
MGG_13291	gene-MGG_13291	0.217117	-2.20346	1.05e-23	6.53e-23	yes	down	4.15333	1.00667	3.95	4.36	4.15	1.3	0.79	0.93	copper amine oxidase
MGG_07910	gene-MGG_07910	0.217391	-2.20164	4.92e-206	3.17e-204	yes	down	168.753	41.0167	159.23	168.87	178.16	39.64	41.59	41.82	dienelactone hydrolase
MGG_08206	gene-MGG_08206	0.218154	-2.19658	6.18e-78	1.17e-76	yes	down	38.1233	9.30667	37.4	36.18	40.79	9.63	8.8	9.49	amidohydrolase
MGG_01662	gene-MGG_01662	0.21929	-2.18909	8.59e-202	5.3e-200	yes	down	766.587	188.617	836.11	726.7	736.95	184.41	195.09	186.35	4-aminobutyrate aminotransferase
MGG_00016	gene-MGG_00016	0.219589	-2.18712	5.72e-09	1.86e-08	yes	down	3.23	0.786667	3.57	3.23	2.89	0.54	0.8	1.02	2-epi-5-epi-valiolone synthase
MGG_07631	gene-MGG_07631	0.219823	-2.18558	1.06e-07	3.19e-07	yes	down	2.85333	0.696667	3.29	3.45	1.82	0.73	0.54	0.82	fungal cellulose binding domain-containing protein
MGG_00588	gene-MGG_00588	0.220058	-2.18404	8.62e-123	2.76e-121	yes	down	78.84	19.1533	82.75	75.54	78.23	18.03	19.96	19.47	CIA30 family protein
MGG_16231	gene-MGG_16231	0.220103	-2.18375	5.01e-12	1.95e-11	yes	down	5.16	1.24667	4.27	6.43	4.78	0.79	0.98	1.97	hypothetical protein
MGG_17276	gene-MGG_17276	0.220678	-2.17999	1.14e-159	5.08e-158	yes	down	867.133	215.44	901.26	823.47	876.67	234.86	204.09	207.37	hypothetical protein
MGG_06950	gene-MGG_06950	0.220729	-2.17965	1.57e-43	1.61e-42	yes	down	15.56	3.83667	15.03	15.95	15.7	3.54	4.06	3.91	L-serine dehydratase
MGG_13647	gene-MGG_13647	0.220998	-2.1779	1.06e-61	1.56e-60	yes	down	25.6667	6.34	27.02	25.66	24.32	6.27	5.96	6.79	3-ketoacyl-CoA thiolase A
MGG_02914	gene-MGG_02914	0.2224	-2.16877	2.4e-103	6.37e-102	yes	down	59.65	14.8533	59.97	59.06	59.92	14.7	15.08	14.78	2-deoxy-D-gluconate 3-dehydrogenase
MGG_16572	gene-MGG_16572	0.222642	-2.16721	0.000837558	0.00175928	yes	down	2.11667	0.53	1.48	2.12	2.75	0.75	0	0.84	hypothetical protein
MGG_09602	gene-MGG_09602	0.225305	-2.15005	2.67e-307	3.09e-305	yes	down	245.507	63.2667	243.35	249.16	244.01	67.41	61.62	60.77	hypothetical protein
MGG_01041	gene-MGG_01041	0.225588	-2.14824	1.69e-223	1.2e-221	yes	down	325.99	82.2	314.05	339.91	324.01	84.29	77.74	84.57	cellulose signaling associated protein ENVOY
MGG_09807	gene-MGG_09807	0.225604	-2.14814	2.69e-16	1.27e-15	yes	down	6.90667	1.82	6.58	7.76	6.38	2.05	1.03	2.38	hypothetical protein
MGG_08615	gene-MGG_08615	0.225812	-2.1468	1.86e-08	5.88e-08	yes	down	4.23	1.05333	3.87	4.99	3.83	1.19	0.47	1.5	dihydrodipicolinate synthase
MGG_17802	gene-MGG_17802	0.227358	-2.13696	1.69e-259	1.4e-257	yes	down	1169.24	297.373	1069.83	1195.88	1242.01	293.81	302.13	296.18	hypothetical protein
MGG_17654	gene-MGG_17654	0.227757	-2.13444	8.52e-08	2.58e-07	yes	down	3.88	0.97	3.12	4.93	3.59	0.43	1.46	1.02	hypothetical protein
MGG_02544	gene-MGG_02544	0.227893	-2.13357	1.92e-14	8.36e-14	yes	down	4.91667	1.25	4.91	4.84	5	1.11	1.25	1.39	D-arabinitol dehydrogenase
MGG_06234	gene-MGG_06234	0.228671	-2.12865	9.08e-190	5e-188	yes	down	421.137	107.69	398.22	416.88	448.31	106.01	107.45	109.61	hypothetical protein
MGG_02615	gene-MGG_02615	0.228935	-2.12699	6.09e-11	2.24e-10	yes	down	3.72667	0.956667	3.51	4.42	3.25	1.07	1.04	0.76	hypothetical protein
MGG_07558	gene-MGG_07558	0.228941	-2.12695	0.000652383	0.00138873	yes	down	2.41333	0.6	1.64	3.47	2.13	0.53	0.3	0.97	hypothetical protein
MGG_14348	gene-MGG_14348	0.229361	-2.12431	1.36e-150	5.61e-149	yes	down	73.56	18.9633	76.3	76.34	68.04	20.7	19.2	16.99	hypothetical protein
MGG_01147	gene-MGG_01147	0.229391	-2.12412	7.27e-07	2.04e-06	yes	down	1.29	0.33	1.43	1.36	1.08	0.2	0.43	0.36	alpha-N-arabinofuranosidase A
MGG_05506	gene-MGG_05506	0.229518	-2.12332	6.79e-31	5.21e-30	yes	down	14.2	3.64333	15.26	13.76	13.58	3.19	4.12	3.62	glyoxylate reductase
MGG_04159	gene-MGG_04159	0.230016	-2.1202	2.04e-11	7.65e-11	yes	down	2.17	0.556667	2.14	2.46	1.91	0.6	0.41	0.66	calcium-proton exchanger
MGG_01606	gene-MGG_01606	0.23016	-2.11929	1.74e-227	1.25e-225	yes	down	159.767	41.1833	161.25	156.35	161.7	40.9	41.68	40.97	methylmalonate-semialdehyde dehydrogenase
MGG_02000	gene-MGG_02000	0.230211	-2.11897	2.31e-151	9.68e-150	yes	down	74.0133	19.0867	73.23	73.07	75.74	18.49	20.35	18.42	hypothetical protein
MGG_16970	gene-MGG_16970	0.230656	-2.11618	2.57e-09	8.58e-09	yes	down	6.97667	1.76	5.45	9.98	5.5	1.62	0.8	2.86	hypothetical protein
MGG_07968	gene-MGG_07968	0.231324	-2.11201	5.82e-163	2.71e-161	yes	down	103.657	18.59	107.85	105.17	97.95	19.86	17.71	18.2	high-affinity nicotinic acid transporter
MGG_05223	gene-MGG_05223	0.231468	-2.11111	1.05e-117	3.15e-116	yes	down	53.4267	13.8533	54.1	52.75	53.43	14.11	13.6	13.85	3-isopropylmalate dehydrogenase
MGG_08330	gene-MGG_08330	0.231663	-2.1099	1.06e-29	7.9e-29	yes	down	15.2267	3.95	12.9	17.02	15.76	4.55	3.64	3.66	dienelactone hydrolase
MGG_07639	gene-MGG_07639	0.231795	-2.10908	5.3e-31	4.07e-30	yes	down	4.36	1.13	4.42	4.29	4.37	1.27	0.94	1.18	excitatory amino acid transporter 2
MGG_08337	gene-MGG_08337	0.234176	-2.09433	3.56e-40	3.39e-39	yes	down	22.7267	6.02	24.74	20.41	23.03	6.94	6.11	5.01	hypothetical protein
MGG_09381	gene-MGG_09381	0.234379	-2.09308	1.34e-33	1.1e-32	yes	down	21.64	5.45667	18.79	21.54	24.59	4.83	5.47	6.07	hypothetical protein
MGG_07969	gene-MGG_07969	0.234958	-2.08953	3.66e-07	1.05e-06	yes	down	68.5033	18.31	80.35	57.32	67.84	22.18	8.61	24.14	hypothetical protein
MGG_03263	gene-MGG_03263	0.235744	-2.08471	6.44e-59	9.01e-58	yes	down	19.1333	5.03333	17.96	19.54	19.9	5.78	4.78	4.54	betaine aldehyde dehydrogenase
MGG_00249	gene-MGG_00249	0.236002	-2.08313	3.28e-94	7.99e-93	yes	down	20.0333	5.32	21.55	19.61	18.94	5.84	5.37	4.75	hypothetical protein
MGG_10583	gene-MGG_10583	0.236768	-2.07845	1.23e-234	9.17e-233	yes	down	360.12	97.1767	360.64	357.83	361.89	93.66	99.81	98.06	12-oxophytodienoate reductase 1
MGG_13562	gene-MGG_13562	0.237332	-2.07502	3.14e-17	1.54e-16	yes	down	3.90333	0.996667	3.6	3.87	4.24	0.88	1.15	0.96	hypothetical protein
MGG_17588	gene-MGG_17588	0.238075	-2.07051	0.000127761	0.000293693	yes	down	1.64	0.43	0.73	2.53	1.66	0.35	0.43	0.51	hypothetical protein
MGG_07250	gene-MGG_07250	0.239253	-2.06339	2.73e-07	7.95e-07	yes	down	0.756667	0.203333	0.45	0.9	0.92	0.25	0.25	0.11	DEAD/DEAH box helicase
MGG_09664	gene-MGG_09664	0.239292	-2.06316	1.03e-07	3.1e-07	yes	down	1.37	0.373333	1.46	1.13	1.52	0.52	0.38	0.22	beta-mannosidase
MGG_16063	gene-MGG_16063	0.240677	-2.05483	1.17e-07	3.51e-07	yes	down	2.97667	0.81	1.84	4.55	2.54	1.17	0.73	0.53	hypothetical protein
MGG_13732	gene-MGG_13732	0.240688	-2.05477	0.0280354	0.0473334	yes	down	0.71	0.183333	0.76	0.85	0.52	0.14	0	0.41	hypothetical protein
MGG_04076	gene-MGG_04076	0.241005	-2.05287	4.53e-23	2.76e-22	yes	down	8.72	2.44667	9.66	8.75	7.75	2.65	2.53	2.16	low-density lipoprotein receptor YWTD
MGG_16212	gene-MGG_16212	0.241196	-2.05172	2.44e-14	1.06e-13	yes	down	14.7567	3.99333	11.73	12.79	19.75	5.98	2.88	3.12	hypothetical protein
MGG_07457	gene-MGG_07457	0.24151	-2.04984	3.04e-86	6.57e-85	yes	down	32.5233	8.54	36.46	30.83	30.28	8.44	8.63	8.55	hypothetical protein
MGG_17825	gene-MGG_17825	0.242957	-2.04123	1.24e-18	6.47e-18	yes	down	4.64667	1.27333	4.47	5.35	4.12	1.35	1.51	0.96	hypothetical protein
MGG_07545	gene-MGG_07545	0.24416	-2.0341	2.25e-138	8.37e-137	yes	down	74.9867	20.34	70.83	76.06	78.07	20.53	20.98	19.51	CTP synthase
MGG_06062	gene-MGG_06062	0.244607	-2.03146	3.84e-151	1.6e-149	yes	down	32.9033	9.03	31.45	34.36	32.9	9.04	9.79	8.26	nitrate reductase
MGG_11343	gene-MGG_11343	0.24538	-2.02691	1.23e-138	4.61e-137	yes	down	52.7967	14.52	51.26	51.63	55.5	14.39	15.29	13.88	phosphoribosylformylglycinamidine cyclo-ligase
MGG_15093	gene-MGG_15093	0.246146	-2.02242	2.6e-27	1.82e-26	yes	down	9.59	2.64667	9.48	10.03	9.26	3.02	2.37	2.55	hypothetical protein
MGG_15745	gene-MGG_15745	0.246319	-2.0214	6.69e-113	1.93e-111	yes	down	40.0133	11.07	38.84	39.47	41.73	11.94	11.15	10.12	hypothetical protein
MGG_06547	gene-MGG_06547	0.246644	-2.0195	8.6e-125	2.79e-123	yes	down	31.4867	8.63	30.81	32.11	31.54	8.76	8.22	8.91	tartrate dehydrogenase/decarboxylase ttuC
MGG_01941	gene-MGG_01941	0.24736	-2.01532	1.62e-11	6.11e-11	yes	down	4.70333	1.3	4.83	6.69	2.59	1.15	1.48	1.27	FAD binding domain-containing protein
MGG_17398	gene-MGG_17398	0.247691	-2.01338	1.82e-24	1.16e-23	yes	down	11.86	3.28333	11.81	11.19	12.58	3.02	3.44	3.39	hypothetical protein
MGG_07268	gene-MGG_07268	0.24787	-2.01234	1.32e-175	6.75e-174	yes	down	128.117	35.8233	133.81	127.68	122.86	36.93	35.68	34.86	isocitrate dehydrogenase
MGG_17153	gene-MGG_17153	0.248372	-2.00943	3.03e-304	3.35e-302	yes	down	4657.78	1295.14	4634.61	4749.34	4589.39	1332.11	1269.63	1283.67	hypothetical protein
MGG_08937	gene-MGG_08937	0.248944	-2.00611	5.54e-14	2.35e-13	yes	down	4.03667	1.12	3.8	4.65	3.66	1.22	1.24	0.9	quinate permease
MGG_00276	gene-MGG_00276	0.250188	-1.99892	5.3e-10	1.84e-09	yes	down	3.69333	1.02667	3.53	3.57	3.98	0.85	1.07	1.16	FAD binding domain-containing protein
MGG_14700	gene-MGG_14700	0.250484	-1.99721	4.5e-164	2.13e-162	yes	down	82.7033	23.1033	83.9	80.36	83.85	22.97	25.11	21.23	hypothetical protein
MGG_02649	gene-MGG_02649	0.250539	-1.99689	7.75e-72	1.35e-70	yes	down	16.5967	4.65	16.53	16.78	16.48	4.48	4.74	4.73	hypothetical protein
MGG_15154	gene-MGG_15154	0.250654	-1.99623	2.96e-121	9.25e-120	yes	down	1747.68	491.273	1800.41	1604.88	1837.76	450.39	507.79	515.64	hypothetical protein
MGG_15774	gene-MGG_15774	0.250868	-1.995	5.16e-216	3.49e-214	yes	down	620.9	169.377	630.44	628.94	603.32	173.98	165.21	168.94	ketol-acid reductoisomerase
MGG_06660	gene-MGG_06660	0.250907	-1.99478	7.21e-147	2.9e-145	yes	down	96.9767	27.2367	93.41	100.48	97.04	26.89	28.65	26.17	3-oxoacyl-[acyl-carrier-protein] reductase
MGG_09919	gene-MGG_09919	0.251162	-1.99331	1.61e-281	1.51e-279	yes	down	292.463	82.2767	288.41	301.08	287.9	84.02	82.74	80.07	amino transferase
MGG_00317	gene-MGG_00317	0.251307	-1.99248	2.56e-140	9.97e-139	yes	down	98.0067	27.66	99.92	96.62	97.48	28.98	28.56	25.44	fumarylacetoacetase
MGG_03118	gene-MGG_03118	0.25135	-1.99223	9.54e-15	4.2e-14	yes	down	2.76	0.786667	2.63	3.2	2.45	1.13	0.61	0.62	hypothetical protein
MGG_07144	gene-MGG_07144	0.251362	-1.99216	5.57e-42	5.52e-41	yes	down	1840.02	543.55	1812.77	1846.26	1861.04	587.27	485.34	558.04	hypothetical protein
MGG_17154	gene-MGG_17154	0.251867	-1.98927	7.14e-160	3.2e-158	yes	down	243.903	68.74	241.26	237.44	253.01	72	63.75	70.47	hypothetical protein
MGG_00283	gene-MGG_00283	0.253059	-1.98246	4.67e-153	1.97e-151	yes	down	6524.93	1816.95	6753.27	6292.86	6528.67	1773.92	1737.96	1938.97	hypothetical protein
MGG_04093	gene-MGG_04093	0.254664	-1.97333	1.58e-80	3.13e-79	yes	down	38.0667	11.3233	34.64	39.74	39.82	11.96	14.28	7.73	hypothetical protein
MGG_03848	gene-MGG_03848	0.254688	-1.9732	1.52e-68	2.5e-67	yes	down	15.57	4.43333	14.73	16.19	15.79	4.17	4.76	4.37	C6 transcription factor
MGG_05429	gene-MGG_05429	0.254996	-1.97145	0.000177747	0.000401813	yes	down	2.64	0.753333	3.17	2.75	2	0.85	0.54	0.87	hypothetical protein
MGG_09130	gene-MGG_09130	0.25536	-1.96939	1.08e-05	2.76e-05	yes	down	2.44	0.72	2.37	2.61	2.34	1.32	0.6	0.24	MFS transporter
MGG_00316	gene-MGG_00316	0.255785	-1.967	6.03e-19	3.2e-18	yes	down	4.14	1.17667	3.52	4.83	4.07	1.19	1.03	1.31	tissue alpha-L-fucosidase
MGG_08129	gene-MGG_08129	0.256049	-1.96551	7.01e-131	2.44e-129	yes	down	77.2133	22.1033	76.06	77.07	78.51	22.52	20.76	23.03	lysine-specific permease
MGG_02933	gene-MGG_02933	0.257174	-1.95919	4.99e-172	2.51e-170	yes	down	229.763	66.27	238.55	216.8	233.94	68.42	65.73	64.66	hypothetical protein
MGG_13110	gene-MGG_13110	0.258012	-1.95449	2.7e-46	2.93e-45	yes	down	19.0867	5.52333	19.2	20.43	17.63	4.84	6.76	4.97	hypothetical protein
MGG_09753	gene-MGG_09753	0.258476	-1.9519	1.02e-22	6.14e-22	yes	down	26.3833	7.62667	28.99	23.73	26.43	6.95	7.51	8.42	hypothetical protein
MGG_02203	gene-MGG_02203	0.258515	-1.95168	4.4e-86	9.44e-85	yes	down	42.8367	12.43	41.33	44.08	43.1	12.47	13.24	11.58	hypothetical protein
MGG_06187	gene-MGG_06187	0.258573	-1.95135	1.1e-67	1.8e-66	yes	down	87.27	25.1933	89.29	81.85	90.67	24.48	24.78	26.32	hypothetical protein
MGG_14352	gene-MGG_14352	0.258921	-1.94942	6.26e-57	8.47e-56	yes	down	346.813	100.037	347.83	353.31	339.3	80.18	97.12	122.81	acetyltransferase
MGG_06381	gene-MGG_06381	0.259265	-1.9475	2.85e-38	2.6e-37	yes	down	16.97	4.95	16.1	16.76	18.05	5.07	5.61	4.17	hypothetical protein
MGG_08748	gene-MGG_08748	0.259438	-1.94654	7.94e-66	1.26e-64	yes	down	17.42	5.06667	16.37	17.26	18.63	5.56	4.79	4.85	hypothetical protein
MGG_02347	gene-MGG_02347	0.259604	-1.94562	4.78e-139	1.83e-137	yes	down	1063.23	308.863	1075.77	1052.5	1061.41	338.1	287.48	301.01	hypothetical protein
MGG_03761	gene-MGG_03761	0.259993	-1.94345	1.25e-65	1.96e-64	yes	down	21.2467	7.19667	18.55	22.24	22.95	6.81	9.28	5.5	hypothetical protein
MGG_13585	gene-MGG_13585	0.260229	-1.94215	0.00286996	0.00561719	yes	down	1.38333	0.403333	1.41	1.23	1.51	0.41	0.39	0.41	hypothetical protein
MGG_17607	gene-MGG_17607	0.260268	-1.94193	0.0104966	0.0189739	yes	down	3.33667	0.93	2.77	3.59	3.65	0.78	0	2.01	hypothetical protein
MGG_06242	gene-MGG_06242	0.260373	-1.94135	2.67e-76	4.9e-75	yes	down	26.4133	7.71	25.14	28.25	25.85	8.21	7.66	7.26	ribosome biogenesis protein Kri1
MGG_09177	gene-MGG_09177	0.261209	-1.93673	5.34e-06	1.4e-05	yes	down	1.69333	0.503333	1.27	2.14	1.67	0.64	0.59	0.28	hypothetical protein
MGG_13801	gene-MGG_13801	0.26137	-1.93583	1.89e-216	1.29e-214	yes	down	109.45	33.8333	107.8	115.24	105.31	35.42	31.5	34.58	beta-galactosidase
MGG_17513	gene-MGG_17513	0.26142	-1.93556	0	0	yes	down	605.523	178.3	599.23	618.03	599.31	186.56	181.09	167.25	delta-1-pyrroline-5-carboxylate dehydrogenase
MGG_05963	gene-MGG_05963	0.261747	-1.93375	2.45e-31	1.89e-30	yes	down	16.5667	4.85333	17.51	16.88	15.31	4.84	4.46	5.26	hypothetical protein
MGG_03036	gene-MGG_03036	0.261995	-1.93239	6.81e-94	1.64e-92	yes	down	60.8933	17.5467	61.03	61.43	60.22	17.03	17.26	18.35	hypothetical protein
MGG_07842	gene-MGG_07842	0.262255	-1.93096	3.12e-10	1.1e-09	yes	down	3.71667	1.08667	4.25	4.36	2.54	1.05	0.97	1.24	hypothetical protein
MGG_08840	gene-MGG_08840	0.262486	-1.92969	2.99e-25	1.94e-24	yes	down	8.10667	2.38667	7.85	8.81	7.66	2.19	2.92	2.05	nucleolar protein 4
MGG_04371	gene-MGG_04371	0.263701	-1.92302	1.03e-122	3.3e-121	yes	down	59.1233	17.3933	56.56	63.19	57.62	16.85	17.77	17.56	general alpha-glucoside permease
MGG_16966	gene-MGG_16966	0.263838	-1.92228	2.55e-16	1.21e-15	yes	down	6.70333	1.98333	6.17	7.11	6.83	1.94	2.21	1.8	hypothetical protein
MGG_16400	gene-MGG_16400	0.263915	-1.92185	2.04e-05	5.06e-05	yes	down	1.45333	0.426667	0.88	2.23	1.25	0.39	0.5	0.39	hypothetical protein
MGG_09071	gene-MGG_09071	0.264086	-1.92092	1.58e-36	1.39e-35	yes	down	15.4433	4.58667	16.61	13.98	15.74	5.02	4.39	4.35	aminobenzoyl-glutamate utilization protein B
MGG_13934	gene-MGG_13934	0.264209	-1.92025	0.00168815	0.00340257	yes	down	1.21667	0.353333	0.96	1.5	1.19	0.25	0.4	0.41	hypothetical protein
MGG_04181	gene-MGG_04181	0.265017	-1.91584	3.91e-216	2.66e-214	yes	down	536.18	159.223	538.69	533.46	536.39	159.81	162.83	155.03	hypothetical protein
MGG_01920	gene-MGG_01920	0.265683	-1.91222	1.02e-13	4.27e-13	yes	down	3.37333	0.996667	3.35	3.43	3.34	0.91	0.92	1.16	C2H2 type zinc finger domain-containing protein
MGG_05120	gene-MGG_05120	0.265824	-1.91146	8.84e-12	3.38e-11	yes	down	5.98667	1.77667	6.95	5.92	5.09	1.25	2.11	1.97	hypothetical protein
MGG_07187	gene-MGG_07187	0.265896	-1.91107	4.89e-192	2.79e-190	yes	down	255.26	77.1867	235.03	269.87	260.88	84.74	79.36	67.46	glutamate synthase
MGG_13563	gene-MGG_13563	0.266519	-1.90769	5.86e-123	1.88e-121	yes	down	174.423	52.2433	178.09	176.89	168.29	57.62	52.89	46.22	hypothetical protein
MGG_02570	gene-MGG_02570	0.266696	-1.90673	9.92e-104	2.65e-102	yes	down	80.5333	24.0033	78.26	82.82	80.52	22.51	25.06	24.44	dienelactone hydrolase
MGG_15898	gene-MGG_15898	0.266709	-1.90666	1.01e-13	4.23e-13	yes	down	103.857	31.2467	81.4	102.98	127.19	29.04	30.12	34.58	hypothetical protein
MGG_08551	gene-MGG_08551	0.266815	-1.90609	1.06e-08	3.39e-08	yes	down	1.68333	0.51	1.63	2.21	1.21	0.51	0.62	0.4	hypothetical protein
MGG_16373	gene-MGG_16373	0.267061	-1.90476	3.69e-13	1.52e-12	yes	down	2.46	0.7	2.26	2.68	2.44	0.8	0.78	0.52	hypothetical protein
MGG_08039	gene-MGG_08039	0.267073	-1.90469	7.4e-06	1.92e-05	yes	down	1.92	0.57	1.53	2.09	2.14	0.29	0.88	0.54	hypothetical protein
MGG_03404	gene-MGG_03404	0.268084	-1.89925	5.69e-213	3.82e-211	yes	down	792.177	240.237	811.65	762.91	801.97	234.34	254.46	231.91	hypothetical protein
MGG_09091	gene-MGG_09091	0.268707	-1.8959	0.012185	0.0218106	yes	down	1.19667	0.363333	1.92	1.12	0.55	0.26	0.4	0.43	adiponectin receptor protein 1
MGG_09198	gene-MGG_09198	0.269212	-1.89319	1.27e-05	3.23e-05	yes	down	1.25667	0.386667	1.14	1.36	1.27	0.59	0.29	0.28	ent-kaurene oxidase
MGG_01553	gene-MGG_01553	0.269292	-1.89276	1.18e-175	6.08e-174	yes	down	108.407	32.7867	106.47	112.29	106.46	35.91	33.1	29.35	3-isopropylmalate dehydratase
MGG_03160	gene-MGG_03160	0.269396	-1.8922	3.17e-09	1.05e-08	yes	down	4.49	1.37333	4.86	3.71	4.9	1.58	1.59	0.95	aldehyde reductase 1
MGG_08984	gene-MGG_08984	0.269456	-1.89188	0.000978041	0.00203305	yes	down	0.513333	0.156667	0.5	0.51	0.53	0.19	0.09	0.19	hypothetical protein
MGG_06636	gene-MGG_06636	0.269876	-1.88963	1.4e-118	4.25e-117	yes	down	176.897	53.2467	186.2	170.38	174.11	53.2	52.44	54.1	class II Aldolase
MGG_13803	gene-MGG_13803	0.270053	-1.88869	2.67e-57	3.63e-56	yes	down	26.4033	8.02667	24.01	29.47	25.73	9.31	8.36	6.41	hypothetical protein
MGG_01289	gene-MGG_01289	0.27054	-1.88609	7.05e-37	6.25e-36	yes	down	12.1333	3.7	12.18	12.77	11.45	3.35	3.8	3.95	hypothetical protein
MGG_05800	gene-MGG_05800	0.271308	-1.88199	3.17e-19	1.7e-18	yes	down	4.93667	1.5	5.32	4.48	5.01	1.58	1.4	1.52	hypothetical protein
MGG_09427	gene-MGG_09427	0.2718	-1.87938	6.07e-20	3.33e-19	yes	down	9.62667	2.91333	9.28	9.99	9.61	2.74	2.74	3.26	hypothetical protein
MGG_05165	gene-MGG_05165	0.271912	-1.87879	6.34e-05	0.000150335	yes	down	1.27333	0.39	1.23	0.88	1.71	0.5	0.29	0.38	hypothetical protein
MGG_14292	gene-MGG_14292	0.272224	-1.87713	1.93e-32	1.53e-31	yes	down	12.74	3.61667	12.3	14.71	11.21	4	3.07	3.78	leupeptin-inactivating enzyme 1
MGG_02710	gene-MGG_02710	0.272454	-1.87591	2.58e-204	1.64e-202	yes	down	628.603	191.993	623.89	623.34	638.58	197.96	197.25	180.77	peroxiredoxin type-2
MGG_02101	gene-MGG_02101	0.273576	-1.86999	5.25e-81	1.04e-79	yes	down	77.1733	23.5833	74.83	78.37	78.32	24.03	21.99	24.73	hypothetical protein
MGG_11480	gene-MGG_11480	0.274795	-1.86357	2.25e-89	5.1e-88	yes	down	79.1367	24.35	85.26	74.9	77.25	22.57	25.3	25.18	succinyl-CoA:3-ketoacid-coenzyme A transferase subunit A
MGG_17893	gene-MGG_17893	0.275113	-1.8619	0.0106628	0.0192612	yes	down	6.95667	2.18	8.5	6.4	5.97	0.95	2.96	2.63	hypothetical protein
MGG_07597	gene-MGG_07597	0.275351	-1.86066	4.19e-158	1.84e-156	yes	down	108.557	33.25	108.28	109.83	107.56	32.79	34.16	32.8	hypothetical protein
MGG_10288	gene-MGG_10288	0.275816	-1.85822	9.02e-16	4.16e-15	yes	down	5.38	1.73667	5.5	5.68	4.96	2.07	2.04	1.1	alkaline phosphatase
MGG_15634	gene-MGG_15634	0.276044	-1.85703	3.26e-07	9.41e-07	yes	down	6.11	2.03333	5.43	4.98	7.92	2.33	1.75	2.02	hypothetical protein
MGG_06661	gene-MGG_06661	0.27746	-1.84965	2.31e-29	1.7e-28	yes	down	7.82	2.44333	8.21	7.81	7.44	2.61	2.38	2.34	MFS transporter
MGG_06169	gene-MGG_06169	0.277628	-1.84878	1.89e-18	9.74e-18	yes	down	13.73	4.30667	14.95	15.1	11.14	6.25	3.49	3.18	hypothetical protein
MGG_01373	gene-MGG_01373	0.277873	-1.8475	6e-120	1.86e-118	yes	down	70.52	21.91	71.45	72.55	67.56	21.28	21.88	22.57	arabinose-proton symporter
MGG_05989	gene-MGG_05989	0.277925	-1.84723	4.98e-65	7.8e-64	yes	down	30.6267	9.52333	28.79	28.94	34.15	9.54	9.37	9.66	seprase
MGG_09063	gene-MGG_09063	0.277939	-1.84716	9.36e-14	3.95e-13	yes	down	3.56667	1.11333	3.26	3.95	3.49	1.52	0.83	0.99	urea active transporter
MGG_08389	gene-MGG_08389	0.27827	-1.84544	0.000194552	0.000437846	yes	down	1.9	0.603333	2.08	1.91	1.71	0.69	0.81	0.31	hypothetical protein
MGG_16668	gene-MGG_16668	0.279423	-1.83948	8.07e-131	2.8e-129	yes	down	1658.39	518.507	1747.92	1612.43	1614.83	524.95	492.25	538.32	hypothetical protein
MGG_04815	gene-MGG_04815	0.279822	-1.83742	0.000740002	0.00156583	yes	down	0.883333	0.306667	0.75	0.54	1.36	0.33	0.38	0.21	hypothetical protein
MGG_07843	gene-MGG_07843	0.280237	-1.83528	6.45e-155	2.77e-153	yes	down	223.78	67.58	203.52	235.88	231.94	63.01	71.15	68.58	hypothetical protein
MGG_12370	gene-MGG_12370	0.280896	-1.83189	2.07e-69	3.46e-68	yes	down	44.1767	13.9533	42.66	45.06	44.81	15.32	14.25	12.29	MKI67 FHA domain-interacting nucleolar phosphoprotein
MGG_09307	gene-MGG_09307	0.28091	-1.83182	1.37e-13	5.74e-13	yes	down	4.62333	1.44333	4.34	4.51	5.02	1.52	1.08	1.73	hexose transporter
MGG_04893	gene-MGG_04893	0.281312	-1.82976	9.19e-124	2.97e-122	yes	down	51.64	16.2933	52.23	51.4	51.29	16.53	16.79	15.56	allantoate permease
MGG_04179	gene-MGG_04179	0.281944	-1.82652	1.48e-36	1.3e-35	yes	down	9.69333	3.07667	9.81	9.06	10.21	3.45	3.09	2.69	ATP-dependent RNA helicase DBP10
MGG_03416	gene-MGG_03416	0.282386	-1.82426	3.43e-175	1.74e-173	yes	down	904.917	286.18	875.05	913.74	925.96	272.01	305.63	280.9	acetyltransferase
MGG_07728	gene-MGG_07728	0.282581	-1.82326	1.99e-46	2.16e-45	yes	down	14.5267	4.62333	13.12	14.35	16.11	5.42	4.75	3.7	hypothetical protein
MGG_00194	gene-MGG_00194	0.284004	-1.81602	3.76e-123	1.21e-121	yes	down	93.7833	37.4833	96.57	92.23	92.55	36.65	40.78	35.02	hypothetical protein
MGG_08026	gene-MGG_08026	0.284145	-1.8153	5.57e-30	4.18e-29	yes	down	38.1467	12.1967	38.25	36.69	39.5	15.65	10.49	10.45	hypothetical protein
MGG_03270	gene-MGG_03270	0.284332	-1.81435	1.58e-28	1.14e-27	yes	down	6.38	2.04667	5.87	6.41	6.86	2.48	2.03	1.63	hypothetical protein
MGG_01104	gene-MGG_01104	0.284916	-1.81139	8.22e-130	2.82e-128	yes	down	237.943	75.8467	242.04	235.53	236.26	73.89	75.6	78.05	acetolactate synthase small subunit
MGG_12979	gene-MGG_12979	0.285113	-1.81039	7.05e-13	2.87e-12	yes	down	3.52667	1.13333	3.41	3.27	3.9	1.56	0.84	1	hypothetical protein
MGG_04312	gene-MGG_04312	0.285226	-1.80982	1.41e-05	3.55e-05	yes	down	2.14	0.673333	2	2.52	1.9	0.87	0.61	0.54	hypothetical protein
MGG_09742	gene-MGG_09742	0.285253	-1.80969	3.05e-28	2.18e-27	yes	down	15.4367	4.93333	14.24	16.35	15.72	4.86	5.24	4.7	hypothetical protein
MGG_12569	gene-MGG_12569	0.286005	-1.80589	1.7e-90	3.91e-89	yes	down	109.17	28.0467	110.73	111.55	105.23	26.13	29.32	28.69	hypothetical protein
MGG_08199	gene-MGG_08199	0.286403	-1.80388	4.24e-94	1.03e-92	yes	down	19.8633	6.37	19.34	20.44	19.81	6.68	6.15	6.28	cutinase transcription factor 1 beta
MGG_01404	gene-MGG_01404	0.28688	-1.80148	9.2e-139	3.48e-137	yes	down	148.25	47.5933	141.39	153.32	150.04	48.02	48.06	46.7	NAD(P)H-dependent D-xylose reductase
MGG_11360	gene-MGG_11360	0.287026	-1.80075	2.78e-13	1.15e-12	yes	down	4.48333	1.44667	4.02	4.59	4.84	1.59	1.6	1.15	nucleolar complex protein 4
MGG_05413	gene-MGG_05413	0.288096	-1.79538	9.8e-06	2.52e-05	yes	down	1.41667	0.46	1.74	1.16	1.35	0.45	0.48	0.45	MFS transporter
MGG_03096	gene-MGG_03096	0.288817	-1.79177	6.97e-40	6.63e-39	yes	down	30.59	9.77667	29.84	31.26	30.67	10.1	8.64	10.59	fructose-bisphosphate aldolase
MGG_03492	gene-MGG_03492	0.289083	-1.79044	1.2e-58	1.67e-57	yes	down	28.2	9.13	27.3	27.31	29.99	9.7	8.62	9.07	acetamidase
MGG_08258	gene-MGG_08258	0.289148	-1.79012	6.72e-121	2.09e-119	yes	down	139.433	45.0333	135.66	151.84	130.8	44.55	43.63	46.92	hypothetical protein
MGG_09996	gene-MGG_09996	0.289968	-1.78603	2.14e-44	2.24e-43	yes	down	95.4267	30.8933	93.78	95.33	97.17	26.41	32.55	33.72	hypothetical protein
MGG_07884	gene-MGG_07884	0.291694	-1.77747	1.58e-30	1.2e-29	yes	down	31.4667	10.2067	30.12	32.05	32.23	9.31	9.54	11.77	ribose 5-phosphate isomerase
MGG_17318	gene-MGG_17318	0.292207	-1.77494	1.09e-07	3.28e-07	yes	down	20.7367	6.75	20.52	22.1	19.59	8.4	4.02	7.83	hypothetical protein
MGG_00431	gene-MGG_00431	0.292617	-1.77291	1.8e-149	7.34e-148	yes	down	402.143	139.287	411.94	395.5	398.99	142.5	136.09	139.27	homogentisate 1,2-dioxygenase
MGG_16244	gene-MGG_16244	0.293175	-1.77017	0.0138342	0.0245393	yes	down	2.80667	0.933333	4.07	2.5	1.85	0.79	1.16	0.85	hypothetical protein
MGG_05008	gene-MGG_05008	0.293309	-1.7695	2.37e-26	1.6e-25	yes	down	15.1633	4.96	13.32	18.21	13.96	5.66	4.13	5.09	aldehyde dehydrogenase
MGG_17103	gene-MGG_17103	0.293325	-1.76943	3.11e-145	1.24e-143	yes	down	5815.04	1905.16	5970.62	5846.8	5627.7	1839.52	1866.72	2009.24	hypothetical protein
MGG_04565	gene-MGG_04565	0.293434	-1.76889	8.21e-19	4.32e-18	yes	down	17.1133	5.68	18.62	17.83	14.89	5.7	7.31	4.03	TPR domain-containing protein
MGG_15915	gene-MGG_15915	0.293579	-1.76818	0.0296824	0.0499553	yes	down	0.496667	0.16	0.24	0.69	0.56	0.22	0.08	0.18	hypothetical protein
MGG_07346	gene-MGG_07346	0.294447	-1.76392	1.59e-39	1.5e-38	yes	down	40.5133	13.32	36.2	39.94	45.4	12.39	13.97	13.6	hypothetical protein
MGG_07455	gene-MGG_07455	0.294742	-1.76248	2.32e-79	4.48e-78	yes	down	80.4533	26.4967	81.33	83.66	76.37	26.42	25.23	27.84	sorbitol utilization protein SOU2
MGG_00289	gene-MGG_00289	0.295295	-1.75977	5.69e-108	1.57e-106	yes	down	68.4767	22.6167	68.88	70.42	66.13	22.41	22.17	23.27	amino-acid permease inda1
MGG_17622	gene-MGG_17622	0.295471	-1.75891	0.0286421	0.0483115	yes	down	0.56	0.186667	0.51	0.61	0.56	0.05	0.39	0.12	hypothetical protein
MGG_05159	gene-MGG_05159	0.295738	-1.75761	7.25e-47	7.95e-46	yes	down	46.4467	15.33	47.57	48.49	43.28	12.62	16.96	16.41	dihydrodipicolinate synthase
MGG_02404	gene-MGG_02404	0.295754	-1.75753	0.0190956	0.033081	yes	down	1.08333	0.333333	1	0.66	1.59	0.11	0.1	0.79	hypothetical protein
MGG_12584	gene-MGG_12584	0.295939	-1.75663	7.69e-15	3.41e-14	yes	down	8.97	2.95	7.92	10.19	8.8	2.41	3.23	3.21	hypothetical protein
MGG_13875	gene-MGG_13875	0.296014	-1.75626	3.4e-19	1.82e-18	yes	down	10.99	3.65667	11.68	11.49	9.8	3.75	4.08	3.14	hypothetical protein
MGG_05139	gene-MGG_05139	0.296364	-1.75456	2.11e-38	1.93e-37	yes	down	31.94	10.5533	30.96	30.74	34.12	10.7	9.12	11.84	hypothetical protein
MGG_02805	gene-MGG_02805	0.296659	-1.75312	1.13e-131	3.98e-130	yes	down	934.157	310.197	970.02	925.93	906.52	314.58	302.96	313.05	hypothetical protein
MGG_09839	gene-MGG_09839	0.298221	-1.74555	3.44e-05	8.37e-05	yes	down	2.66	0.886667	3.09	2.89	2	0.62	1.21	0.83	hypothetical protein
MGG_06221	gene-MGG_06221	0.29849	-1.74424	7.35e-12	2.83e-11	yes	down	5.47667	1.81	6.12	5.06	5.25	1.68	1.24	2.51	hypothetical protein
MGG_09322	gene-MGG_09322	0.298646	-1.74349	5.37e-07	1.52e-06	yes	down	1.61667	0.553333	1.6	1.59	1.66	0.57	0.74	0.35	hypothetical protein
MGG_05940	gene-MGG_05940	0.299267	-1.7405	3.48e-63	5.25e-62	yes	down	44.3633	14.8833	44.64	44.14	44.31	15.02	15.35	14.28	short chain dehydrogenase
MGG_02064	gene-MGG_02064	0.299414	-1.73979	2.12e-05	5.26e-05	yes	down	1.49	0.5	1.3	1.29	1.88	0.46	0.55	0.49	hypothetical protein
MGG_17828	gene-MGG_17828	0.300037	-1.73679	2.06e-68	3.38e-67	yes	down	54.5833	18.3367	52.23	51.77	59.75	18.2	18.65	18.16	hypothetical protein
MGG_17811	gene-MGG_17811	0.300406	-1.73502	0.0053799	0.0101229	yes	down	2.36333	0.796667	2.54	2.05	2.5	0.94	0.77	0.68	hypothetical protein
MGG_00273	gene-MGG_00273	0.300731	-1.73345	5.96e-09	1.94e-08	yes	down	43.3833	14.6667	44.15	48.1	37.9	17.78	16.57	9.65	hypothetical protein
MGG_01224	gene-MGG_01224	0.300813	-1.73306	4.13e-38	3.75e-37	yes	down	11.9367	4.03	10.42	13.3	12.09	4.33	4.33	3.43	WD repeat-containing protein
MGG_02726	gene-MGG_02726	0.300886	-1.73271	7.61e-16	3.52e-15	yes	down	8.05	2.75	9.34	6.13	8.68	3.34	2.87	2.04	glutamyl-tRNA(Gln) amidotransferase subunit A
MGG_05912	gene-MGG_05912	0.301017	-1.73208	0.00305019	0.00594701	yes	down	0.903333	0.31	1.08	0.64	0.99	0.44	0.24	0.25	N-acyl-L-amino acid amidohydrolase
MGG_17608	gene-MGG_17608	0.301451	-1.73	0.00933831	0.0170105	yes	down	3.29	1.11	3.2	2.89	3.78	0.59	1.9	0.84	hypothetical protein
MGG_16196	gene-MGG_16196	0.301915	-1.72778	1.65e-27	1.16e-26	yes	down	10.7333	3.16333	11.81	9.51	10.88	3.96	2.75	2.78	hypothetical protein
MGG_03583	gene-MGG_03583	0.301925	-1.72774	2.5e-52	3.07e-51	yes	down	21.9167	7.40667	22.27	21.51	21.97	8.17	6.6	7.45	cystathionine gamma-synthase
MGG_02881	gene-MGG_02881	0.301936	-1.72769	1.29e-22	7.73e-22	yes	down	14.52	4.90333	14.81	14.19	14.56	5.16	4.32	5.23	deoxyribose-phosphate aldolase 2
MGG_02124	gene-MGG_02124	0.302097	-1.72692	6.32e-34	5.22e-33	yes	down	5.97333	2.02667	6.1	5.98	5.84	2.28	1.89	1.91	potassium uptake protein
MGG_11859	gene-MGG_11859	0.302715	-1.72397	1.12e-26	7.65e-26	yes	down	16.29	5.48333	14.2	18.11	16.56	5.89	5.18	5.38	hypothetical protein
MGG_10938	gene-MGG_10938	0.30302	-1.72251	0.0106795	0.0192881	yes	down	0.76	0.253333	0.96	0.75	0.57	0.14	0.22	0.4	phthalate transporter
MGG_09261	gene-MGG_09261	0.303239	-1.72147	9.4e-38	8.51e-37	yes	down	24.25	8.31	24.71	25.53	22.51	8.69	8.08	8.16	hypothetical protein
MGG_04254	gene-MGG_04254	0.303752	-1.71903	1.12e-09	3.82e-09	yes	down	10.15	3.49	9.34	10.62	10.49	4.82	3.43	2.22	hypothetical protein
MGG_10498	gene-MGG_10498	0.30397	-1.718	9.13e-09	2.94e-08	yes	down	4.68	1.60333	4.79	4.91	4.34	2.21	1.28	1.32	hypothetical protein
MGG_16854	gene-MGG_16854	0.304433	-1.7158	3.82e-169	1.85e-167	yes	down	143.443	48.9233	133.5	148.81	148.02	51.59	48.76	46.42	hypothetical protein
MGG_04194	gene-MGG_04194	0.304531	-1.71534	2.68e-25	1.75e-24	yes	down	11.6433	3.96333	10.89	11.26	12.78	3.33	4.58	3.98	acetyl esterase
MGG_17489	gene-MGG_17489	0.305236	-1.712	2.09e-06	5.69e-06	yes	down	81.2867	27.92	80.96	97.58	65.32	31.93	40.32	11.51	hypothetical protein
MGG_08941	gene-MGG_08941	0.305604	-1.71026	9.23e-16	4.26e-15	yes	down	19.6033	6.78667	20.4	19.42	18.99	8.12	7.49	4.75	hypothetical protein
MGG_08011	gene-MGG_08011	0.305762	-1.70952	1.88e-83	3.86e-82	yes	down	115.997	39.6367	115.49	118.17	114.33	40.66	36.36	41.89	D-amino-acid oxidase
MGG_04913	gene-MGG_04913	0.305872	-1.709	9.94e-165	4.73e-163	yes	down	4171.66	1429.14	4147.22	4126.96	4240.79	1332.04	1503.96	1451.42	hypothetical protein
MGG_00039	gene-MGG_00039	0.307529	-1.70121	3.23e-55	4.26e-54	yes	down	23.7367	7.95667	24.37	22.73	24.11	7.72	7.34	8.81	hypothetical protein
MGG_03856	gene-MGG_03856	0.308136	-1.69836	3.78e-42	3.76e-41	yes	down	25.5167	8.79	24.83	26.24	25.48	8.86	8.51	9	hypothetical protein
MGG_10723	gene-MGG_10723	0.308652	-1.69595	0.000218148	0.000488669	yes	down	230.203	80.46	238.1	213.54	238.97	77.88	123.63	39.87	hypothetical protein
MGG_00779	gene-MGG_00779	0.308757	-1.69546	1.23e-19	6.67e-19	yes	down	10.0133	3.42	8.89	10.93	10.22	2.79	3	4.47	choline dehydrogenase
MGG_04258	gene-MGG_04258	0.309508	-1.69195	0.000362602	0.000792529	yes	down	4.24333	1.45333	2.61	7.31	2.81	1.08	2.04	1.24	hypothetical protein
MGG_13063	gene-MGG_13063	0.309917	-1.69004	4.38e-99	1.11e-97	yes	down	85.4967	29.7967	84.63	83.8	88.06	32.13	31.22	26.04	hypothetical protein
MGG_11737	gene-MGG_11737	0.310159	-1.68892	1.45e-180	7.67e-179	yes	down	1468.97	509.627	1405.32	1489.16	1512.44	502.78	508.18	517.92	hypothetical protein
MGG_12307	gene-MGG_12307	0.310733	-1.68625	8.59e-111	2.46e-109	yes	down	630.887	219.42	665.8	606.65	620.21	215.53	213.38	229.35	hypothetical protein
MGG_00346	gene-MGG_00346	0.31089	-1.68552	1.67e-48	1.9e-47	yes	down	17.2833	6.04	18.35	16.47	17.03	5.85	6.81	5.46	pi-transporter A-1
MGG_04590	gene-MGG_04590	0.311414	-1.68309	7.26e-17	3.5e-16	yes	down	4.48667	1.56667	4.3	4.79	4.37	1.34	1.95	1.41	acetyl-coenzyme A synthetase
MGG_13635	gene-MGG_13635	0.312123	-1.67981	9.62e-34	7.91e-33	yes	down	13.8333	4.84667	12.99	14.05	14.46	5.29	4.82	4.43	hypothetical protein
MGG_08163	gene-MGG_08163	0.312206	-1.67943	9.05e-06	2.33e-05	yes	down	714.47	302.313	866.57	671.2	605.64	275.79	159.67	471.48	30S ribosomal protein S14p/S29e
MGG_06784	gene-MGG_06784	0.312212	-1.6794	1.44e-27	1.01e-26	yes	down	15.88	5.56667	15.77	16.46	15.41	5.95	5.13	5.62	aldo-keto reductase
MGG_02096	gene-MGG_02096	0.312718	-1.67707	3.4e-08	1.06e-07	yes	down	1.73	0.61	1.83	1.93	1.43	0.51	0.85	0.47	glycoside hydrolase
MGG_09783	gene-MGG_09783	0.314708	-1.66791	1.05e-191	5.92e-190	yes	down	2449.29	864.06	2468.95	2384.1	2494.81	856.17	896.09	839.92	hypothetical protein
MGG_05785	gene-MGG_05785	0.314757	-1.66769	1.48e-11	5.59e-11	yes	down	4.73333	1.68333	4.06	4.62	5.52	2.43	1.24	1.38	levanase
MGG_00715	gene-MGG_00715	0.314932	-1.66689	6.03e-112	1.74e-110	yes	down	3022.37	1065.04	3169.19	2946.05	2951.86	1096.81	1015.06	1083.26	glucose-repressible protein
MGG_00190	gene-MGG_00190	0.314959	-1.66676	6.33e-15	2.81e-14	yes	down	8.48	2.99667	7.9	9.55	7.99	3.24	3.21	2.54	hypothetical protein
MGG_04470	gene-MGG_04470	0.315461	-1.66447	2.35e-24	1.49e-23	yes	down	6.61	2.35	5.98	7.06	6.79	2.64	2.49	1.92	hypothetical protein
MGG_06699	gene-MGG_06699	0.315933	-1.66231	3.73e-91	8.62e-90	yes	down	38.48	13.78	36.24	38.86	40.34	14.59	14.74	12.01	hypothetical protein
MGG_17041	gene-MGG_17041	0.316632	-1.65912	1.25e-143	4.94e-142	yes	down	164.557	52.31	157.22	167.13	169.32	53.86	52.72	50.35	saccharopine dehydrogenase
MGG_06139	gene-MGG_06139	0.316864	-1.65806	2.3e-102	6.03e-101	yes	down	243.153	86.1967	241.83	238.17	249.46	89.46	98.04	71.09	squalene monooxygenase
MGG_12880	gene-MGG_12880	0.317246	-1.65633	0.010576	0.0191142	yes	down	0.386667	0.14	0.42	0.26	0.48	0.19	0.13	0.1	alpha-L-rhamnosidase
MGG_10750	gene-MGG_10750	0.317341	-1.65589	0.000715159	0.00151568	yes	down	0.763333	0.273333	0.97	0.91	0.41	0.24	0.33	0.25	oligopeptide transporter 2
MGG_09599	gene-MGG_09599	0.318021	-1.6528	1.26e-47	1.4e-46	yes	down	31.4067	11.2	30.46	31.1	32.66	11.61	11.44	10.55	hypothetical protein
MGG_05888	gene-MGG_05888	0.318222	-1.6519	3.72e-76	6.79e-75	yes	down	47.1833	16.85	48.29	47.11	46.15	18.02	16.58	15.95	hypothetical protein
MGG_03840	gene-MGG_03840	0.318291	-1.65158	7.39e-110	2.11e-108	yes	down	128.017	45.6167	127.89	131.44	124.72	46.52	45.27	45.06	2-oxoisovalerate dehydrogenase subunit alpha
MGG_17514	gene-MGG_17514	0.318558	-1.65037	1.9e-79	3.69e-78	yes	down	43.4133	15.5067	41.91	47.48	40.85	16.25	15.98	14.29	hypothetical protein
MGG_01096	gene-MGG_01096	0.318945	-1.64862	9.07e-81	1.8e-79	yes	down	26.13	9.34333	26.71	26.28	25.4	9.29	9.76	8.98	glucoamylase
MGG_02204	gene-MGG_02204	0.319249	-1.64725	2.87e-12	1.13e-11	yes	down	4.55333	1.62333	4.82	4.33	4.51	1.85	1.44	1.58	vitamin H transporter
MGG_09466	gene-MGG_09466	0.319396	-1.64658	9.5e-181	5.07e-179	yes	down	386.543	134.46	395.96	378.68	384.99	136	139	128.38	hypothetical protein
MGG_09260	gene-MGG_09260	0.319554	-1.64587	4.95e-113	1.44e-111	yes	down	366.567	131.24	381.07	351.45	367.18	131.89	130.12	131.71	integral membrane protein
MGG_17829	gene-MGG_17829	0.319565	-1.64582	2.88e-85	6.13e-84	yes	down	70.4967	25.2033	66.76	73.12	71.61	24.38	26.65	24.58	hypothetical protein
MGG_04225	gene-MGG_04225	0.320444	-1.64186	2.94e-06	7.91e-06	yes	down	1.84667	0.666667	1.9	1.91	1.73	0.73	0.7	0.57	MFS quinate transporter
MGG_03143	gene-MGG_03143	0.320777	-1.64036	7.08e-23	4.28e-22	yes	down	10.8533	3.91667	12.33	11.37	8.86	3.6	4.8	3.35	phenol 2-monooxygenase
MGG_04344	gene-MGG_04344	0.321236	-1.63829	1.74e-39	1.64e-38	yes	down	15.11	5.42667	14.92	15.11	15.3	5.2	5.53	5.55	hypothetical protein
MGG_02103	gene-MGG_02103	0.321524	-1.637	1.83e-29	1.36e-28	yes	down	33.05	11.8467	33.3	33.09	32.76	13.3	11.56	10.68	maltose O-acetyltransferase
MGG_01292	gene-MGG_01292	0.321738	-1.63604	1.11e-61	1.63e-60	yes	down	28.77	10.3267	27.25	30.9	28.16	10.5	11	9.48	nucleolar protein NOP2
MGG_20112	gene-MGG_20112	0.322989	-1.63045	1.43e-100	3.68e-99	yes	down	1778.87	642.767	1766.6	1838.54	1731.46	651.65	625.49	651.16	tRNA-OTHER
MGG_05499	gene-MGG_05499	0.323695	-1.62729	3.62e-11	1.34e-10	yes	down	6.17333	2.24333	5.5	5.87	7.15	2.58	2.11	2.04	serine/threonine protein kinase
MGG_04503	gene-MGG_04503	0.324251	-1.62482	1.13e-146	4.54e-145	yes	down	100.987	36.7833	100.74	100.2	102.02	38.61	38.6	33.14	carbamoyl-phosphate synthase subunit arginine-specific large
MGG_00495	gene-MGG_00495	0.32433	-1.62447	2.32e-60	3.33e-59	yes	down	41.67	15.1067	38.79	45.03	41.19	16.2	13.83	15.29	hypothetical protein
MGG_14085	gene-MGG_14085	0.324631	-1.62313	6.01e-12	2.33e-11	yes	down	7.37	2.66	7.54	6.64	7.93	1.87	3.19	2.92	short-chain oxidoreductase
MGG_04059	gene-MGG_04059	0.32475	-1.6226	1.19e-104	3.2e-103	yes	down	92.9433	33.95	91.11	94.84	92.88	31.99	37.27	32.59	phosphoserine aminotransferase
MGG_13001	gene-MGG_13001	0.32486	-1.62211	5.62e-29	4.08e-28	yes	down	14.5667	5.28	13.47	16.22	14.01	5.14	5.31	5.39	hypothetical protein
MGG_06653	gene-MGG_06653	0.325037	-1.62132	3.77e-41	3.66e-40	yes	down	42.8633	15.6433	44.68	46.38	37.53	17.31	15.39	14.23	hypothetical protein
MGG_01572	gene-MGG_01572	0.325783	-1.61802	1.56e-60	2.25e-59	yes	down	17.62	6.46333	17.51	17.81	17.54	7.35	6.51	5.53	DNA-directed RNA polymerase I subunit RPA2
MGG_04993	gene-MGG_04993	0.32591	-1.61746	2.01e-31	1.57e-30	yes	down	18.1667	6.61333	14.64	19.68	20.18	6.92	6.58	6.34	ATP-dependent RNA helicase DBP9
MGG_11644	gene-MGG_11644	0.325996	-1.61707	6.23e-18	3.15e-17	yes	down	9.26	3.39333	9.93	9.6	8.25	4.11	3	3.07	hypothetical protein
MGG_10724	gene-MGG_10724	0.326282	-1.61581	8.51e-45	8.98e-44	yes	down	27.2467	10.0133	28.95	24.85	27.94	10.7	10.06	9.28	cytochrome P450 monooxygenase
MGG_04501	gene-MGG_04501	0.326451	-1.61506	0.000494547	0.001066	yes	down	0.956667	0.34	0.91	0.85	1.11	0.26	0.33	0.43	hypothetical protein
MGG_09032	gene-MGG_09032	0.326791	-1.61356	3.3e-33	2.68e-32	yes	down	21.4833	7.85	20.59	22.79	21.07	8.87	6.55	8.13	aspergillopepsin-2
MGG_07224	gene-MGG_07224	0.327185	-1.61182	1.23e-116	3.66e-115	yes	down	89.3533	32.7167	83.19	92.51	92.36	33.66	32.43	32.06	threonine dehydratase
MGG_02460	gene-MGG_02460	0.328786	-1.60478	4.4e-37	3.92e-36	yes	down	24.6633	9.04333	21.02	26.33	26.64	9.02	8.88	9.23	ribosome biogenesis protein YTM1
MGG_10103	gene-MGG_10103	0.328946	-1.60408	2.3e-20	1.28e-19	yes	down	14.34	5.24	12.62	15.84	14.56	3.99	5.89	5.84	hypothetical protein
MGG_09667	gene-MGG_09667	0.329045	-1.60364	4.17e-10	1.46e-09	yes	down	8.2	2.99	7.09	8.31	9.2	2.39	2.96	3.62	hypothetical protein
MGG_06778	gene-MGG_06778	0.32962	-1.60112	1.03e-14	4.51e-14	yes	down	4.95	1.82667	5.51	5.42	3.92	1.69	1.86	1.93	C6 zinc finger domain-containing protein
MGG_00956	gene-MGG_00956	0.329904	-1.59988	1.95e-07	5.77e-07	yes	down	4.19	1.52667	3.44	3.97	5.16	1.21	1.45	1.92	dihydrodipicolinate synthase
MGG_04995	gene-MGG_04995	0.329959	-1.59964	1.84e-55	2.45e-54	yes	down	13.4133	4.98	12.42	14.24	13.58	5.42	5.49	4.03	U3 small nucleolar RNA-associated protein 10
MGG_07737	gene-MGG_07737	0.330135	-1.59887	8.4e-25	5.4e-24	yes	down	3.37	1.25667	3.18	3.65	3.28	1.48	1.41	0.88	U3 small nucleolar RNA-associated protein 20
MGG_08028	gene-MGG_08028	0.330267	-1.5983	1.11e-05	2.84e-05	yes	down	7.12667	2.62667	6.79	7.33	7.26	1.93	3.16	2.79	hypothetical protein
MGG_00980	gene-MGG_00980	0.33029	-1.5982	1.43e-21	8.31e-21	yes	down	30.15	11.2	31.59	31.02	27.84	11.25	12.1	10.25	hypothetical protein
MGG_17678	gene-MGG_17678	0.330293	-1.59818	5.59e-101	1.44e-99	yes	down	70.69	25.6633	70.31	70.18	71.58	28.58	24.64	23.77	hypothetical protein
MGG_15599	gene-MGG_15599	0.330652	-1.59662	1.48e-46	1.61e-45	yes	down	25.6667	9.48667	24.8	27.38	24.82	8.75	10.35	9.36	hypothetical protein
MGG_16056	gene-MGG_16056	0.331765	-1.59177	0.000213938	0.000479645	yes	down	7.63333	2.78667	6.72	7.52	8.66	2.74	1.65	3.97	hypothetical protein
MGG_18030	gene-MGG_18030	0.331775	-1.59172	0.00619938	0.011572	yes	down	5.34	1.97333	6.58	4.64	4.8	3.81	1.41	0.7	hypothetical protein
MGG_01874	gene-MGG_01874	0.331778	-1.59171	1.1e-30	8.41e-30	yes	down	18.3567	6.83333	19.35	17.73	17.99	6.08	7.93	6.49	hypothetical protein
MGG_17803	gene-MGG_17803	0.332448	-1.5888	6.32e-77	1.17e-75	yes	down	44.7033	16.01	44.66	45.64	43.81	15.89	15.03	17.11	hypothetical protein
MGG_16316	gene-MGG_16316	0.332789	-1.58732	3.44e-16	1.61e-15	yes	down	8.45333	3.13	7.84	8.92	8.6	2.85	3.09	3.45	hypothetical protein
MGG_17536	gene-MGG_17536	0.333516	-1.58417	0.00347102	0.00671072	yes	down	1.86667	0.706667	2.21	1.24	2.15	0.95	0.63	0.54	hypothetical protein
MGG_15319	gene-MGG_15319	0.334178	-1.58131	4.73e-27	3.25e-26	yes	down	27.6133	10.3067	27.46	26.94	28.44	11.18	8.52	11.22	hypothetical protein
MGG_05507	gene-MGG_05507	0.334257	-1.58097	1.76e-14	7.67e-14	yes	down	7.37333	2.78333	7.17	8.1	6.85	3.83	2.33	2.19	hypothetical protein
MGG_08207	gene-MGG_08207	0.334713	-1.579	1.77e-32	1.41e-31	yes	down	14.2167	4.73333	12.31	20.48	9.86	6.39	3.77	4.04	hypothetical protein
MGG_00087	gene-MGG_00087	0.335152	-1.57711	9.02e-37	7.99e-36	yes	down	27.1333	10.14	26.22	28.68	26.5	9.98	9.43	11.01	ribosome biogenesis protein SSF1
MGG_00409	gene-MGG_00409	0.33558	-1.57527	2.93e-100	7.49e-99	yes	down	4300.14	1614.89	4476.97	4138.63	4284.81	1529.11	1603.26	1712.29	hypothetical protein
MGG_07628	gene-MGG_07628	0.336032	-1.57333	3.69e-192	2.12e-190	yes	down	295.483	82.8133	289.2	290.21	307.04	84	84.44	80	acetolactate synthase
MGG_14774	gene-MGG_14774	0.336149	-1.57283	3.93e-60	5.61e-59	yes	down	201.923	73.2733	214.39	204.64	186.74	70.66	68.82	80.34	hypothetical protein
MGG_06429	gene-MGG_06429	0.336922	-1.56951	1.49e-37	1.34e-36	yes	down	24.46	9.25	27.38	23.57	22.43	10	8.73	9.02	hypothetical protein
MGG_05505	gene-MGG_05505	0.3376	-1.56661	0.0152058	0.0267753	yes	down	0.693333	0.27	0.85	0.79	0.44	0.45	0.19	0.17	autophagy protein
MGG_01183	gene-MGG_01183	0.337709	-1.56615	6.18e-50	7.21e-49	yes	down	25.23	9.55	25.49	25.38	24.82	8.72	10.88	9.05	pescadillo
MGG_06088	gene-MGG_06088	0.338121	-1.56439	1.52e-139	5.84e-138	yes	down	293.803	109.877	290.69	299.01	291.71	111.43	110.71	107.49	hypothetical protein
MGG_03824	gene-MGG_03824	0.338158	-1.56423	1.08e-17	5.4e-17	yes	down	14.5967	5.52667	17.45	11.53	14.81	4.64	5.76	6.18	NAD-dependent methanol dehydrogenase
MGG_01924	gene-MGG_01924	0.338404	-1.56318	3.99e-50	4.68e-49	yes	down	31.5533	11.9467	30.64	33.3	30.72	10.83	13.27	11.74	benzoate 4-monooxygenase cytochrome P450
MGG_06376	gene-MGG_06376	0.338594	-1.56237	4.23e-60	6.02e-59	yes	down	94.5033	35.6967	99.86	91.34	92.31	34.68	34.72	37.69	pyrroline-5-carboxylate reductase
MGG_05339	gene-MGG_05339	0.339346	-1.55917	3.31e-16	1.56e-15	yes	down	22.81	8.64667	20.63	21.91	25.89	7.11	9.94	8.89	hypothetical protein
MGG_11820	gene-MGG_11820	0.339473	-1.55863	2.08e-14	9.02e-14	yes	down	4.99333	1.89667	4.45	5.74	4.79	2.37	1.89	1.43	hypothetical protein
MGG_08178	gene-MGG_08178	0.339935	-1.55667	7.17e-21	4.05e-20	yes	down	7.39	2.83333	7.89	7.83	6.45	2.79	3.48	2.23	U3 small nucleolar RNA-associated protein 13
MGG_09818	gene-MGG_09818	0.340229	-1.55542	2.28e-21	1.31e-20	yes	down	13.9633	5.29333	13.65	14.26	13.98	5.18	4.76	5.94	hypothetical protein
MGG_12551	gene-MGG_12551	0.340603	-1.55384	8.1e-21	4.56e-20	yes	down	29.2833	11.0833	28.38	32.18	27.29	10.98	9.32	12.95	hypothetical protein
MGG_13610	gene-MGG_13610	0.341522	-1.54995	7.68e-10	2.63e-09	yes	down	3.14	1.19	3.07	3.16	3.19	1.05	1.16	1.36	hydrolase
MGG_08867	gene-MGG_08867	0.341701	-1.54919	2.8e-31	2.17e-30	yes	down	14.9733	5.76333	15.45	13.59	15.88	6.81	5.38	5.1	nucleolar complex protein 2
MGG_07973	gene-MGG_07973	0.341916	-1.54829	7.16e-151	2.97e-149	yes	down	989.497	378.69	978.8	1014.15	975.54	393.08	374.59	368.4	surface protein 1
MGG_05611	gene-MGG_05611	0.342405	-1.54622	0.0158517	0.0278296	yes	down	51.94	19.8167	55.73	61.25	38.84	33.15	11.12	15.18	hypothetical protein
MGG_08333	gene-MGG_08333	0.343425	-1.54193	2.5e-45	2.67e-44	yes	down	51.33	19.5567	49	52.15	52.84	21.12	18.31	19.24	hypothetical protein
MGG_06587	gene-MGG_06587	0.344154	-1.53887	2.25e-117	6.76e-116	yes	down	189.777	72.7333	185.42	186	197.91	75.88	74.29	68.03	leucyl aminopeptidase
MGG_07076	gene-MGG_07076	0.344378	-1.53794	8.98e-63	1.35e-61	yes	down	50.8967	19.6033	48.01	53.46	51.22	20.07	20	18.74	oxidoreductase
MGG_02611	gene-MGG_02611	0.344559	-1.53718	1.46e-74	2.61e-73	yes	down	48.16	18.3067	47.04	48.87	48.57	21.17	19.78	13.97	L-aminoadipate-semialdehyde dehydrogenase
MGG_15402	gene-MGG_15402	0.344612	-1.53695	2.54e-35	2.16e-34	yes	down	14.4233	5.57667	15.89	14.05	13.33	5.16	5.62	5.95	hypothetical protein
MGG_02811	gene-MGG_02811	0.344873	-1.53586	1.13e-108	3.16e-107	yes	down	78.3	61.3533	77.76	75.47	81.67	59.26	63.64	61.16	acyl-protein thioesterase 1
MGG_15027	gene-MGG_15027	0.345188	-1.53455	3.16e-55	4.18e-54	yes	down	28.29	10.9233	28.27	28.08	28.52	10.64	10.97	11.16	sulfate adenylyltransferase
MGG_04465	gene-MGG_04465	0.345594	-1.53285	1.64e-160	7.41e-159	yes	down	2769.78	1074.56	2807.04	2736.42	2765.88	1081.83	1156.89	984.95	hypothetical protein
MGG_15015	gene-MGG_15015	0.346376	-1.52959	2.13e-25	1.4e-24	yes	down	24.0567	8.39667	25.2	22.31	24.66	9.19	9.72	6.28	hypothetical protein
MGG_11389	gene-MGG_11389	0.346392	-1.52952	3.36e-37	3e-36	yes	down	21.4467	8.30667	20.8	21.54	22	7.97	9.02	7.93	threonine aldolase
MGG_09249	gene-MGG_09249	0.346627	-1.52854	2.42e-90	5.55e-89	yes	down	89.6767	34.9467	85.69	92.89	90.45	38.7	36.45	29.69	peptidase S9 prolyl oligopeptidase active site-containing protein
MGG_01230	gene-MGG_01230	0.347726	-1.52398	4.15e-176	2.14e-174	yes	down	883.373	344.063	868.6	887.46	894.06	355.33	339.5	337.36	succinate-semialdehyde dehydrogenase
MGG_14939	gene-MGG_14939	0.348122	-1.52234	7.81e-44	8.09e-43	yes	down	43.86	17.0267	47.79	42.61	41.18	18.9	16.95	15.23	hypothetical protein
MGG_02180	gene-MGG_02180	0.348717	-1.51987	5.67e-05	0.000135107	yes	down	7.32	2.85333	7.88	9.06	5.02	1.85	3.8	2.91	hypothetical protein
MGG_13107	gene-MGG_13107	0.348874	-1.51922	1.93e-91	4.47e-90	yes	down	219.017	85.4833	224.99	218.05	214.01	85.64	82.27	88.54	hypothetical protein
MGG_00369	gene-MGG_00369	0.348877	-1.51921	9.29e-69	1.54e-67	yes	down	63.13	24.75	63.88	61.22	64.29	24.78	27.29	22.18	cell division cycle protein 123
MGG_00312	gene-MGG_00312	0.349291	-1.5175	1.44e-95	3.57e-94	yes	down	111.337	43.4633	101.21	117	115.8	43.1	43.78	43.51	glyoxylate reductase
MGG_03493	gene-MGG_03493	0.34937	-1.51717	2.7e-35	2.3e-34	yes	down	25.84	10.1467	28.51	24.05	24.96	10.36	10.32	9.76	hypothetical protein
MGG_04201	gene-MGG_04201	0.349663	-1.51596	1.19e-24	7.64e-24	yes	down	16.24	6.36	14.87	16.35	17.5	7.01	6.02	6.05	U3 small nucleolar ribonucleoprotein imp3
MGG_09757	gene-MGG_09757	0.350412	-1.51288	1.5e-23	9.32e-23	yes	down	8.74333	3.45667	9.95	8.52	7.76	3.77	3.63	2.97	neutral alpha-glucosidase ab
MGG_00537	gene-MGG_00537	0.350498	-1.51252	1.06e-147	4.28e-146	yes	down	416.223	165.003	424.31	421.42	402.94	162.22	166.45	166.34	ammonium transporter MEP1
MGG_00675	gene-MGG_00675	0.350524	-1.51242	6.3e-06	1.64e-05	yes	down	1.44667	0.56	1.39	1.55	1.4	0.46	0.54	0.68	hypothetical protein
MGG_09313	gene-MGG_09313	0.350614	-1.51205	1.14e-38	1.06e-37	yes	down	17.3367	6.82333	16.95	18.42	16.64	6.75	7.69	6.03	ribosome biogenesis protein ERB1
MGG_03038	gene-MGG_03038	0.350786	-1.51134	7.44e-96	1.85e-94	yes	down	59.46	23.3633	56.78	62.32	59.28	23.15	24.91	22.03	hypothetical protein
MGG_14936	gene-MGG_14936	0.350822	-1.51119	2.41e-27	1.68e-26	yes	down	31.7433	12.4533	33.58	29.86	31.79	12.12	11.85	13.39	haloacid dehalogenase
MGG_15479	gene-MGG_15479	0.35175	-1.50738	5.24e-42	5.2e-41	yes	down	30.4833	12.0767	32.23	30.17	29.05	14.14	12.44	9.65	hypothetical protein
MGG_12601	gene-MGG_12601	0.352271	-1.50524	6.31e-32	4.95e-31	yes	down	15.4167	6.10667	15.48	14.97	15.8	6.63	6.28	5.41	D-lactate dehydrogenase
MGG_04826	gene-MGG_04826	0.352802	-1.50307	9.27e-80	1.81e-78	yes	down	92.29	36.4133	91.89	95.81	89.17	36.99	35.03	37.22	glycine cleavage system T protein
MGG_02616	gene-MGG_02616	0.353979	-1.49826	5.63e-67	9.02e-66	yes	down	37.5133	14.9167	37.8	37.61	37.13	15.97	15.11	13.67	isocitrate lyase
MGG_06329	gene-MGG_06329	0.355481	-1.49216	5.22e-26	3.48e-25	yes	down	22.6867	9.02333	22.47	21.85	23.74	9.13	8.73	9.21	S-(hydroxymethyl)glutathione dehydrogenase
MGG_07980	gene-MGG_07980	0.355851	-1.49065	3.34e-06	8.92e-06	yes	down	2.59667	1.04	2.6	2.12	3.07	1.11	1.03	0.98	metabolite transporter
MGG_02730	gene-MGG_02730	0.355859	-1.49062	9.48e-33	7.59e-32	yes	down	20.55	8.18333	17.68	22.25	21.72	8.01	8.96	7.58	RNA binding protein
MGG_03266	gene-MGG_03266	0.35587	-1.49058	3.06e-34	2.55e-33	yes	down	31.4033	12.55	31.98	31.2	31.03	13.95	12.11	11.59	hypothetical protein
MGG_03372	gene-MGG_03372	0.356778	-1.4869	2.07e-62	3.08e-61	yes	down	2058.31	812.623	2172.47	1980.63	2021.83	757.58	770.02	910.27	40S ribosomal protein S20
MGG_05814	gene-MGG_05814	0.35712	-1.48552	9.67e-103	2.54e-101	yes	down	119.947	48.09	122.94	122.69	114.21	50.06	50.13	44.08	potassium-activated aldehyde dehydrogenase
MGG_09639	gene-MGG_09639	0.357537	-1.48383	2.66e-70	4.53e-69	yes	down	109.663	44.19	116.04	107.68	105.27	47.93	49.08	35.56	alpha-1,3-glucan synthase Ags2
MGG_05335	gene-MGG_05335	0.357708	-1.48315	2.73e-32	2.16e-31	yes	down	53.3933	21.3433	49.14	55.7	55.34	19.44	23.37	21.22	hypothetical protein
MGG_14642	gene-MGG_14642	0.358096	-1.48158	4.4e-08	1.36e-07	yes	down	6.61	2.64	5.53	7.38	6.92	2.54	2.87	2.51	hypothetical protein
MGG_03097	gene-MGG_03097	0.358197	-1.48118	4.37e-15	1.95e-14	yes	down	8.12	3.27	8.24	8.17	7.95	3.26	3.76	2.79	oxidoreductase
MGG_17620	gene-MGG_17620	0.358425	-1.48026	0.00683734	0.0126832	yes	down	0.61	0.243333	0.63	0.63	0.57	0.3	0.17	0.26	hypothetical protein
MGG_01710	gene-MGG_01710	0.359829	-1.47462	1.72e-37	1.55e-36	yes	down	34.3933	14.2833	35.97	35.38	31.83	14.3	15.41	13.14	chorismate mutase
MGG_07529	gene-MGG_07529	0.360156	-1.47331	6.91e-14	2.93e-13	yes	down	25.5367	10.31	28.47	28.2	19.94	9.29	10.81	10.83	60S ribosomal subunit assembly/export protein LOC1
MGG_01268	gene-MGG_01268	0.360234	-1.47299	1.72e-93	4.11e-92	yes	down	115.43	46.6367	118.94	112.7	114.65	44.72	50.44	44.75	nuclear localization sequence binding protein
MGG_07048	gene-MGG_07048	0.360475	-1.47203	2.03e-116	6.03e-115	yes	down	674.803	272.66	696.18	653.55	674.68	265.25	283.89	268.84	60S ribosomal protein L5
MGG_05067	gene-MGG_05067	0.360492	-1.47196	7.36e-25	4.74e-24	yes	down	22.4667	9.01667	21.41	23.13	22.86	7.98	8.5	10.57	aspartate aminotransferase
MGG_04075	gene-MGG_04075	0.360509	-1.47189	0.00125501	0.00257153	yes	down	2.2	0.893333	3.58	1.69	1.33	0.86	0.8	1.02	lambda-crystallin
MGG_07877	gene-MGG_07877	0.36059	-1.47157	2.19e-133	7.81e-132	yes	down	630.123	254.297	606.68	635.06	648.63	263.21	244.67	255.01	dipeptidyl-peptidase V
MGG_17152	gene-MGG_17152	0.360772	-1.47084	1.98e-58	2.73e-57	yes	down	77.8067	30.9767	79.33	79.93	74.16	31.34	33.42	28.17	hypothetical protein
MGG_00919	gene-MGG_00919	0.360846	-1.47055	4.16e-84	8.66e-83	yes	down	63.3533	25.59	62.68	65.28	62.1	25.03	26.49	25.25	GMP synthase
MGG_03080	gene-MGG_03080	0.361573	-1.46764	1.26e-39	1.19e-38	yes	down	15.0733	6.10667	15.47	14.44	15.31	6.38	5.71	6.23	ribosome biogenesis protein Sqt1
MGG_07718	gene-MGG_07718	0.361691	-1.46717	1.59e-25	1.05e-24	yes	down	9.85333	4.00667	9.98	9.42	10.16	4.33	4.03	3.66	ATP-dependent RNA helicase DRS1
MGG_01679	gene-MGG_01679	0.36227	-1.46486	4.4e-28	3.14e-27	yes	down	38.48	15.6733	41.06	36.32	38.06	14.28	17.66	15.08	ThiJ/PfpI family protein
MGG_12890	gene-MGG_12890	0.362522	-1.46386	1.92e-103	5.09e-102	yes	down	58.3433	23.7033	55.51	60.18	59.34	23.87	24.9	22.34	hypothetical protein
MGG_00764	gene-MGG_00764	0.362733	-1.46302	6.49e-21	3.67e-20	yes	down	12.8967	5.25667	12.78	12.4	13.51	5.59	5.39	4.79	hypothetical protein
MGG_12184	gene-MGG_12184	0.362762	-1.46291	3.36e-10	1.18e-09	yes	down	17.4367	7.14667	15.95	17.89	18.47	8.08	8.66	4.7	hypothetical protein
MGG_15351	gene-MGG_15351	0.36317	-1.46128	0.00640925	0.011935	yes	down	1.70333	0.683333	1.41	2.04	1.66	0.45	0.85	0.75	hypothetical protein
MGG_08695	gene-MGG_08695	0.363418	-1.4603	1.19e-10	4.3e-10	yes	down	6.63333	2.68667	5.57	7.67	6.66	2.96	2.35	2.75	NAD-binding Rossmann fold oxidoreductase
MGG_07602	gene-MGG_07602	0.363804	-1.45877	6.7e-16	3.1e-15	yes	down	16.5833	6.73	16.5	16.7	16.55	7.1	5.53	7.56	tyrosine phosphatase
MGG_13157	gene-MGG_13157	0.364267	-1.45693	2.82e-32	2.23e-31	yes	down	27.9767	8.53667	27.89	23.45	32.59	9.82	6.67	9.12	acetate kinase
MGG_06865	gene-MGG_06865	0.364293	-1.45683	2.87e-101	7.44e-100	yes	down	285.477	111.44	285.08	258.37	312.98	113.67	106.35	114.3	hypothetical protein
MGG_01912	gene-MGG_01912	0.364644	-1.45544	1.92e-17	9.52e-17	yes	down	15.63	5.35333	13.24	20.74	12.91	6.73	4.38	4.95	beta-glucosidase 1
MGG_17687	gene-MGG_17687	0.36472	-1.45514	0.000193221	0.000434941	yes	down	2.81333	1.16333	3.02	2.38	3.04	1.09	1.55	0.85	hypothetical protein
MGG_01223	gene-MGG_01223	0.364989	-1.45408	3.86e-37	3.45e-36	yes	down	57.81	23.53	57.7	56.91	58.82	22.17	22.08	26.34	naringenin 3-dioxygenase
MGG_05852	gene-MGG_05852	0.365119	-1.45356	3.13e-10	1.1e-09	yes	down	11.9733	4.85667	9.98	13.68	12.26	4.79	4.83	4.95	hypothetical protein
MGG_15831	gene-MGG_15831	0.365378	-1.45254	1.76e-77	3.28e-76	yes	down	148.51	60.8067	154.48	143.72	147.33	61.56	60.26	60.6	hypothetical protein
MGG_05260	gene-MGG_05260	0.365648	-1.45147	1.03e-58	1.43e-57	yes	down	14.25	5.85	13.47	14.81	14.47	6	6.42	5.13	hypothetical protein
MGG_17594	gene-MGG_17594	0.365783	-1.45094	2.98e-06	8e-06	yes	down	9.86333	4.08333	12.31	7.78	9.5	4.16	4.47	3.62	hypothetical protein
MGG_10673	gene-MGG_10673	0.365835	-1.45073	0.0124919	0.022311	yes	down	1.58	0.656667	1.84	1.66	1.24	0.68	0.8	0.49	hypothetical protein
MGG_04887	gene-MGG_04887	0.366029	-1.44997	2.68e-29	1.96e-28	yes	down	17.5867	7.20333	17.85	18.26	16.65	7.33	6.96	7.32	hypothetical protein
MGG_03880	gene-MGG_03880	0.367034	-1.44602	3.99e-23	2.43e-22	yes	down	14.2333	5.83333	13.16	15.11	14.43	5.71	6	5.79	alcohol dehydrogenase 1
MGG_17983	gene-MGG_17983	0.367246	-1.44518	5.59e-26	3.73e-25	yes	down	14.42	5.93667	14.28	15.24	13.74	5.51	6.73	5.57	MFS monocarboxylate transporter
MGG_03383	gene-MGG_03383	0.367385	-1.44464	4.65e-07	1.32e-06	yes	down	3.72667	1.54667	3.08	4	4.1	1.66	1.93	1.05	hypothetical protein
MGG_04337	gene-MGG_04337	0.367396	-1.44459	9.64e-142	3.76e-140	yes	down	239.403	99.78	239.94	234.96	243.31	100.69	102.5	96.15	catalase-peroxidase 1
MGG_06553	gene-MGG_06553	0.367417	-1.44451	2.97e-12	1.17e-11	yes	down	9.16	3.75667	9.2	8.64	9.64	3	4.29	3.98	hypothetical protein
MGG_03295	gene-MGG_03295	0.367971	-1.44233	4.97e-07	1.41e-06	yes	down	2.36	0.973333	2.11	2.23	2.74	0.84	1.26	0.82	hypothetical protein
MGG_08140	gene-MGG_08140	0.368229	-1.44132	2.41e-35	2.06e-34	yes	down	15.3433	6.35	14.17	15.92	15.94	7.02	6.64	5.39	AdoMet-dependent rRNA methyltransferase SPB1
MGG_07549	gene-MGG_07549	0.369042	-1.43814	6.88e-05	0.00016238	yes	down	1.97	0.806667	2.05	1.91	1.95	1	0.36	1.06	RING-4 protein
MGG_02709	gene-MGG_02709	0.369068	-1.43804	6.96e-49	7.96e-48	yes	down	95.7433	39.56	87.16	101.64	98.43	43.29	38.59	36.8	hypothetical protein
MGG_05600	gene-MGG_05600	0.369474	-1.43646	1.04e-69	1.74e-68	yes	down	45.6467	18.8967	45.65	44.66	46.63	18.38	19.84	18.47	quinate permease
MGG_13012	gene-MGG_13012	0.369842	-1.43502	0.013664	0.0242536	yes	down	1.54667	0.633333	1.64	1.06	1.94	0.53	0.43	0.94	hypothetical protein
MGG_07949	gene-MGG_07949	0.370029	-1.43429	2.39e-23	1.47e-22	yes	down	14.0033	5.79	12.34	14.31	15.36	5.51	6.94	4.92	hypothetical protein
MGG_04464	gene-MGG_04464	0.370103	-1.434	4.32e-85	9.17e-84	yes	down	81.3933	33.7067	77.57	85.17	81.44	37.71	33.81	29.6	alpha-mannosidase
MGG_08983	gene-MGG_08983	0.370167	-1.43375	7.92e-21	4.46e-20	yes	down	18.9533	7.85667	20.44	18.94	17.48	7.86	7.53	8.18	catechol 1,2-dioxygenase 1
MGG_02453	gene-MGG_02453	0.371347	-1.42916	3.22e-34	2.68e-33	yes	down	41.09	17.1733	40.3	43.88	39.09	16.81	21.08	13.63	rRNA processing protein Ebp2
MGG_07433	gene-MGG_07433	0.371515	-1.42851	1.12e-17	5.61e-17	yes	down	15.6167	6.50667	16.64	15.9	14.31	5.72	7.56	6.24	hypothetical protein
MGG_06428	gene-MGG_06428	0.371521	-1.42849	3.72e-104	9.97e-103	yes	down	155.603	64.8767	157.26	151.2	158.35	67.3	69.36	57.97	hypothetical protein
MGG_04751	gene-MGG_04751	0.371798	-1.42741	1.06e-16	5.08e-16	yes	down	7.75667	3.21667	7.35	8.22	7.7	2.96	3.25	3.44	hypothetical protein
MGG_06586	gene-MGG_06586	0.371946	-1.42684	1.19e-51	1.44e-50	yes	down	77.85	32.2967	77.76	78.62	77.17	31.25	30.43	35.21	hypothetical protein
MGG_04032	gene-MGG_04032	0.372094	-1.42626	1.39e-11	5.26e-11	yes	down	18.6633	7.7	18.02	19.04	18.93	7.74	9.76	5.6	hypothetical protein
MGG_12732	gene-MGG_12732	0.373273	-1.4217	4.13e-51	4.95e-50	yes	down	69.4667	29.0433	74	64.47	69.93	28.37	28.81	29.95	hypothetical protein
MGG_05948	gene-MGG_05948	0.37338	-1.42128	1.03e-118	3.13e-117	yes	down	337.457	141.113	338.56	326.07	347.74	146.47	143.3	133.57	zinc knuckle domain-containing protein
MGG_04449	gene-MGG_04449	0.373746	-1.41987	1.55e-86	3.36e-85	yes	down	94.6233	38.8133	94.38	97.33	92.16	38.07	38.71	39.66	branched-chain alpha-keto acid lipoamide acyltransferase
MGG_03870	gene-MGG_03870	0.373859	-1.41943	4.09e-52	5e-51	yes	down	29.0667	12.2033	28.48	29.15	29.57	11.79	14.03	10.79	minor extracellular protease vpr
MGG_07278	gene-MGG_07278	0.373874	-1.41938	8.01e-107	2.2e-105	yes	down	111.76	46.8567	112.53	115.67	107.08	47.24	49.13	44.2	hypothetical protein
MGG_08361	gene-MGG_08361	0.374203	-1.41811	3.31e-34	2.75e-33	yes	down	27.6533	11.5633	25.31	29.29	28.36	11.28	11.99	11.42	hypothetical protein
MGG_11021	gene-MGG_11021	0.374426	-1.41725	1.77e-131	6.22e-130	yes	down	471.77	198.203	465.28	461.94	488.09	203.49	212.28	178.84	hypothetical protein
MGG_01501	gene-MGG_01501	0.374677	-1.41628	1.27e-29	9.46e-29	yes	down	29.4267	12.3333	30.18	27.57	30.53	12.23	11.78	12.99	hypothetical protein
MGG_16900	gene-MGG_16900	0.374712	-1.41614	1.96e-50	2.32e-49	yes	down	69.5833	57.8767	57.33	79.91	71.51	69.78	62.45	41.4	hypothetical protein
MGG_10805	gene-MGG_10805	0.375165	-1.4144	4.51e-05	0.000108395	yes	down	4.83667	2.03	5.04	4.25	5.22	1.6	2.34	2.15	hypothetical protein
MGG_03781	gene-MGG_03781	0.37534	-1.41373	0.00322084	0.00625895	yes	down	4.5	1.88333	5.47	2.81	5.22	1.88	1.16	2.61	hypothetical protein
MGG_17810	gene-MGG_17810	0.375405	-1.41348	3.6e-17	1.76e-16	yes	down	3.55	1.5	2.89	3.95	3.81	1.96	1.41	1.13	hypothetical protein
MGG_03330	gene-MGG_03330	0.37562	-1.41265	1.09e-32	8.72e-32	yes	down	27.62	11.4833	25.94	28.68	28.24	12	10.33	12.12	dimethylaniline monooxygenase
MGG_06332	gene-MGG_06332	0.375792	-1.41199	6.01e-39	5.6e-38	yes	down	38.31	15.7867	35.63	42.23	37.07	16.48	15.35	15.53	peroxisomal adenine nucleotide transporter 1
MGG_11776	gene-MGG_11776	0.376668	-1.40863	7.21e-85	1.52e-83	yes	down	389.993	164.63	400	371.77	398.21	153.89	175.79	164.21	40S ribosomal protein S0
MGG_10320	gene-MGG_10320	0.376691	-1.40855	1.28e-115	3.77e-114	yes	down	103.227	43.5933	102.4	105.04	102.24	44.62	44.69	41.47	methylcrotonoyl-CoA carboxylase subunit alpha
MGG_05157	gene-MGG_05157	0.377016	-1.4073	0.000338418	0.000743189	yes	down	4.15333	1.77	4.45	4.27	3.74	1.55	2.47	1.29	hypothetical protein
MGG_07610	gene-MGG_07610	0.377133	-1.40685	5.44e-26	3.63e-25	yes	down	36.52	15.3033	35.57	40.38	33.61	14.41	13.26	18.24	hypothetical protein
MGG_16350	gene-MGG_16350	0.377443	-1.40567	1.04e-10	3.78e-10	yes	down	332.73	140.893	325.65	336.73	335.81	175.17	141.81	105.7	hypothetical protein
MGG_02541	gene-MGG_02541	0.377509	-1.40542	1.52e-106	4.14e-105	yes	down	169.997	71.8333	160.18	173.5	176.31	74.75	70.12	70.63	methylcrotonoyl-CoA carboxylase subunit beta
MGG_08622	gene-MGG_08622	0.377527	-1.40535	5.92e-89	1.33e-87	yes	down	505.6	213.76	528.91	481.06	506.83	211.23	210.52	219.53	nucleoside diphosphate kinase
MGG_04426	gene-MGG_04426	0.377729	-1.40458	3.84e-31	2.96e-30	yes	down	76.3367	31.8	81.02	74.83	73.16	31.77	31.12	32.51	endoribonuclease L-PSP
MGG_00464	gene-MGG_00464	0.377883	-1.40399	3.41e-22	2.02e-21	yes	down	12.5233	5.30333	11.44	13.82	12.31	5.83	5.05	5.03	MFS phospholipid transporter Git1
MGG_00221	gene-MGG_00221	0.377935	-1.40379	1.5e-83	3.1e-82	yes	down	882.74	366.07	917.46	862.77	867.99	339.1	381.41	377.7	40S ribosomal protein S7
MGG_14129	gene-MGG_14129	0.378582	-1.40132	5.09e-16	2.37e-15	yes	down	8.50333	3.63	8.03	8.3	9.18	3.92	3.63	3.34	hypothetical protein
MGG_05237	gene-MGG_05237	0.37885	-1.4003	8.58e-94	2.06e-92	yes	down	961.25	408.007	981.86	929.93	971.96	388.8	423.75	411.47	60S ribosomal protein L7
MGG_01236	gene-MGG_01236	0.37894	-1.39996	1e-58	1.39e-57	yes	down	35.8467	15.18	35.03	37.63	34.88	14.6	15.35	15.59	WD repeat-containing protein slp1
MGG_09851	gene-MGG_09851	0.379152	-1.39915	0.00394565	0.00756498	yes	down	2.25667	0.95	2.51	2.23	2.03	0.76	0.96	1.13	hypothetical protein
MGG_05810	gene-MGG_05810	0.379217	-1.39891	2.62e-24	1.66e-23	yes	down	10.66	4.52667	10.08	10.69	11.21	4.13	5.19	4.26	ATP-dependent RNA helicase DBP7
MGG_04994	gene-MGG_04994	0.37972	-1.39699	3.29e-140	1.28e-138	yes	down	215.277	91.7	217.46	220.57	207.8	95	94.1	86	plasma membrane H+-ATPase
MGG_08758	gene-MGG_08758	0.379919	-1.39624	3.5e-137	1.29e-135	yes	down	1129.4	464.193	1159.13	1100.15	1128.92	471.55	468.17	452.86	aminopeptidase Y
MGG_06692	gene-MGG_06692	0.380215	-1.39511	3.86e-73	6.8e-72	yes	down	427.45	206.287	398.24	461.85	422.26	195.56	247.71	175.59	hypothetical protein
MGG_00253	gene-MGG_00253	0.380232	-1.39505	2.39e-72	4.18e-71	yes	down	64.75	27.61	65.89	63.97	64.39	28.51	27.42	26.9	imidazole glycerol phosphate synthase hisHF
MGG_10969	gene-MGG_10969	0.380236	-1.39503	1.91e-75	3.47e-74	yes	down	130.107	54.87	131.66	130.49	128.17	52.03	54.82	57.76	kynureninase
MGG_04746	gene-MGG_04746	0.380563	-1.39379	8.72e-27	5.96e-26	yes	down	9.35667	4	8.84	9.65	9.58	4.59	3.79	3.62	DOM34-interacting protein 2
MGG_09749	gene-MGG_09749	0.381285	-1.39106	3.01e-56	4.04e-55	yes	down	41.7433	17.6567	41.6	42.63	41	17.81	17.5	17.66	hypothetical protein
MGG_07049	gene-MGG_07049	0.381289	-1.39104	2.87e-13	1.19e-12	yes	down	10.5067	4.47	11.1	10.19	10.23	3.48	4.94	4.99	hypothetical protein
MGG_05865	gene-MGG_05865	0.381821	-1.38903	1.18e-06	3.27e-06	yes	down	2.24667	0.98	2.69	2.52	1.53	1.18	1.21	0.55	glyoxal oxidase
MGG_06712	gene-MGG_06712	0.382044	-1.38819	1.86e-132	6.59e-131	yes	down	339.377	145.497	322.7	356.81	338.62	157.3	145	134.19	5-methyltetrahydropteroyltriglutamate-homocysteine S-methyltransferase
MGG_16154	gene-MGG_16154	0.382123	-1.38789	2.27e-16	1.08e-15	yes	down	10.3267	4.42667	10.51	10.04	10.43	5.58	3.34	4.36	tRNA-pseudouridine synthase
MGG_00969	gene-MGG_00969	0.382575	-1.38619	4.15e-136	1.51e-134	yes	down	322.817	136.927	307.78	325.42	335.25	137.62	137.19	135.97	asparagine synthetase
MGG_03735	gene-MGG_03735	0.383422	-1.383	1.69e-83	3.47e-82	yes	down	60.7933	45.7267	58.01	64.95	59.42	48.69	46.73	41.76	Sad1-interacting factor 3
MGG_06386	gene-MGG_06386	0.384458	-1.3791	2.13e-12	8.44e-12	yes	down	11.9467	4.94333	11.89	10.86	13.09	5.44	4.88	4.51	hypothetical protein
MGG_16969	gene-MGG_16969	0.384468	-1.37906	3e-51	3.6e-50	yes	down	78.95	31.1067	78.32	84.01	74.52	29.12	30.38	33.82	hypothetical protein
MGG_08611	gene-MGG_08611	0.385601	-1.37482	7.24e-48	8.11e-47	yes	down	47.7233	20.6067	44.49	48.33	50.35	21.53	20.52	19.77	hypothetical protein
MGG_05956	gene-MGG_05956	0.385645	-1.37465	3.68e-89	8.31e-88	yes	down	155.8	67.32	139.62	164.83	162.95	69.37	70.55	62.04	glutamyl-tRNA synthetase
MGG_06480	gene-MGG_06480	0.38573	-1.37434	5.14e-113	1.49e-111	yes	down	1622.02	720.77	1622.22	1592.04	1651.81	681.81	736.66	743.84	40S ribosomal protein S12
MGG_06059	gene-MGG_06059	0.386652	-1.37089	2.17e-27	1.52e-26	yes	down	15.1933	6.57333	14.52	14.8	16.26	6.57	6.73	6.42	arrestin
MGG_03872	gene-MGG_03872	0.387325	-1.36838	2.51e-15	1.13e-14	yes	down	6.87333	3	6.54	6.8	7.28	3.06	3.66	2.28	hypothetical protein
MGG_00941	gene-MGG_00941	0.387397	-1.36812	1.14e-13	4.8e-13	yes	down	10.4033	4.33333	9.28	11.54	10.39	4.34	4.94	3.72	hypothetical protein
MGG_02306	gene-MGG_02306	0.387644	-1.3672	0.0117754	0.0211451	yes	down	1.41	0.62	1.29	1.3	1.64	0.66	0.81	0.39	abhydrolase
MGG_12603	gene-MGG_12603	0.387892	-1.36627	9.07e-18	4.55e-17	yes	down	19.8133	8.55667	19.82	20.23	19.39	7.17	8.88	9.62	hypothetical protein
MGG_09576	gene-MGG_09576	0.388841	-1.36275	0.00453329	0.00861545	yes	down	1.87	0.806667	1.91	1.64	2.06	0.77	0.72	0.93	hypothetical protein
MGG_11934	gene-MGG_11934	0.389528	-1.3602	2.42e-50	2.84e-49	yes	down	104.657	38.2633	102.68	101.51	109.78	39.07	36.55	39.17	acetylornithine aminotransferase
MGG_00560	gene-MGG_00560	0.389592	-1.35997	4.37e-25	2.82e-24	yes	down	12.9733	5.65333	11.41	14.1	13.41	5.26	6.39	5.31	ATP-dependent RNA helicase MAK5
MGG_03508	gene-MGG_03508	0.389806	-1.35917	1.02e-74	1.83e-73	yes	down	61.6133	26.72	59.5	65.64	59.7	29.14	26.74	24.28	Cel3e
MGG_00806	gene-MGG_00806	0.39007	-1.3582	6.39e-11	2.34e-10	yes	down	1.16	0.503333	1.07	1.22	1.19	0.5	0.5	0.51	hypothetical protein
MGG_04092	gene-MGG_04092	0.390386	-1.35703	4.81e-46	5.18e-45	yes	down	47.97	21.0367	47.22	48.59	48.1	22.01	21.47	19.63	glycosyl transferase
MGG_06260	gene-MGG_06260	0.390657	-1.35603	0.000317838	0.00069973	yes	down	1.04	0.463333	1.05	0.93	1.14	0.53	0.59	0.27	hypothetical protein
MGG_06202	gene-MGG_06202	0.390835	-1.35537	1.26e-25	8.31e-25	yes	down	9.44667	4.15	8.43	10.11	9.8	4.62	4.5	3.33	GTP binding protein Bms1
MGG_16076	gene-MGG_16076	0.391888	-1.35149	5.17e-09	1.69e-08	yes	down	20.93	11.2167	10.91	22.4	29.48	4.1	14.86	14.69	hypothetical protein
MGG_03504	gene-MGG_03504	0.391945	-1.35128	2.43e-07	7.11e-07	yes	down	6.85333	3.02	8.41	7.77	4.38	3.18	3.47	2.41	hypothetical protein
MGG_04595	gene-MGG_04595	0.392225	-1.35025	1.56e-22	9.31e-22	yes	down	45.1833	19.0433	38.82	52.02	44.71	19.71	18.88	18.54	hypothetical protein
MGG_16711	gene-MGG_16711	0.392227	-1.35024	4.85e-94	1.17e-92	yes	down	63.3967	27.9033	60.5	65.86	63.83	29.15	29.41	25.15	hypothetical protein
MGG_13813	gene-MGG_13813	0.392406	-1.34958	8.12e-12	3.12e-11	yes	down	11.1233	4.88	11.02	10.56	11.79	4.19	5.45	5	phosphoribosylglycinamide formyltransferase
MGG_04641	gene-MGG_04641	0.392411	-1.34956	4.08e-16	1.91e-15	yes	down	9.26333	4.08667	8.73	9.94	9.12	4.32	4.3	3.64	transcription factor AATF/Che-1
MGG_06081	gene-MGG_06081	0.392546	-1.34907	1.78e-81	3.57e-80	yes	down	106.89	41.8867	109.23	105.91	105.53	44.57	40.94	40.15	hypothetical protein
MGG_16921	gene-MGG_16921	0.392912	-1.34772	3.06e-53	3.85e-52	yes	down	225.56	99.2367	223.55	210.73	242.4	98.18	99.56	99.97	hypothetical protein
MGG_00923	gene-MGG_00923	0.393037	-1.34726	4.46e-85	9.44e-84	yes	down	142.577	62.7033	141.86	141.27	144.6	62.24	61.8	64.07	serine hydroxymethyltransferase
MGG_04104	gene-MGG_04104	0.393135	-1.3469	2.08e-97	5.19e-96	yes	down	1144.7	503.647	1120.29	1129.06	1184.75	478.06	520.11	512.77	60S ribosomal protein L22
MGG_03051	gene-MGG_03051	0.393162	-1.3468	2.05e-76	3.78e-75	yes	down	107.473	46.5067	112.78	105.95	103.69	45.51	46.13	47.88	aspartate-semialdehyde dehydrogenase
MGG_01470	gene-MGG_01470	0.394166	-1.34313	2.11e-74	3.76e-73	yes	down	135.657	52.7167	128.02	140.23	138.72	49.41	56.5	52.24	hypothetical protein
MGG_05805	gene-MGG_05805	0.394912	-1.3404	9.98e-24	6.23e-23	yes	down	15.82	7.19	15.81	16.27	15.38	6.85	7.69	7.03	hypothetical protein
MGG_01438	gene-MGG_01438	0.395029	-1.33997	2.03e-05	5.05e-05	yes	down	16.6167	7.31667	16.42	18.63	14.8	11.57	3.05	7.33	cyclohexadienyl dehydratase
MGG_00400	gene-MGG_00400	0.3951	-1.33971	1.46e-58	2.02e-57	yes	down	194.617	86.36	203.16	180.45	200.24	87.51	90.36	81.21	hypothetical protein
MGG_09080	gene-MGG_09080	0.395849	-1.33698	6.95e-87	1.52e-85	yes	down	127	56.49	123.28	125.89	131.83	59.68	60.6	49.19	arginyl-tRNA synthetase
MGG_02244	gene-MGG_02244	0.395921	-1.33672	2.3e-37	2.06e-36	yes	down	45.9667	20.3167	42.48	47.72	47.7	19.48	20.56	20.91	glutathione S-transferase Gst3
MGG_16252	gene-MGG_16252	0.396276	-1.33542	6.72e-13	2.74e-12	yes	down	2.91333	1.29667	1.96	3.37	3.41	1.3	1.64	0.95	hypothetical protein
MGG_05844	gene-MGG_05844	0.39631	-1.3353	1.25e-42	1.25e-41	yes	down	57.5567	25.49	56.37	55.1	61.2	23.35	26.31	26.81	mannan endo-1,4-beta-mannosidase 1
MGG_02305	gene-MGG_02305	0.396311	-1.3353	0.00945375	0.0172031	yes	down	1.41333	0.63	1.68	1.34	1.22	0.84	0.31	0.74	hypothetical protein
MGG_08476	gene-MGG_08476	0.396436	-1.33484	7.52e-10	2.58e-09	yes	down	6.89	3.05667	6.4	6.58	7.69	3.08	3.09	3	hypothetical protein
MGG_10581	gene-MGG_10581	0.39644	-1.33482	2.69e-118	8.15e-117	yes	down	397.853	177.093	400.96	391.13	401.47	183.75	185.67	161.86	hypothetical protein
MGG_14115	gene-MGG_14115	0.396507	-1.33458	2.19e-33	1.79e-32	yes	down	24.29	10.8067	26.67	23.13	23.07	10.68	11.02	10.72	GabA permease
MGG_01730	gene-MGG_01730	0.396835	-1.33339	2.97e-108	8.21e-107	yes	down	91.1633	38.4833	86.69	96.88	89.92	38.38	41.15	35.92	hypothetical protein
MGG_13715	gene-MGG_13715	0.396875	-1.33324	0.00524104	0.00987743	yes	down	1.49	0.66	1.37	1.87	1.23	0.42	0.92	0.64	beta-lactamase
MGG_00548	gene-MGG_00548	0.39719	-1.3321	2.14e-108	5.99e-107	yes	down	3852.16	1725.75	3926.59	3757.09	3872.81	1703.33	1741.81	1732.11	CTR2 short splice
MGG_14350	gene-MGG_14350	0.397248	-1.33189	1.55e-53	1.98e-52	yes	down	26.59	11.8367	25.36	26.32	28.09	11.59	12.99	10.93	ribosome assembly protein RRB1
MGG_04493	gene-MGG_04493	0.397813	-1.32984	1.74e-17	8.61e-17	yes	down	9.28333	4.11667	8.24	8.86	10.75	3.53	4.51	4.31	hypothetical protein
MGG_00866	gene-MGG_00866	0.3983	-1.32807	1.53e-08	4.87e-08	yes	down	3.73333	1.66	3.13	3.99	4.08	1.43	1.96	1.59	HMG box-containing protein
MGG_03208	gene-MGG_03208	0.39856	-1.32713	2.51e-128	8.44e-127	yes	down	304.53	136.007	294.98	305.01	313.6	143.75	136.94	127.33	glycolipid-anchored surface protein 5
MGG_09175	gene-MGG_09175	0.399243	-1.32466	7.28e-13	2.96e-12	yes	down	10.1833	4.49	10.13	10.2	10.22	3.93	5.39	4.15	beta-lactamase
MGG_01673	gene-MGG_01673	0.399841	-1.3225	1.45e-44	1.51e-43	yes	down	16.69	7.38	15.83	17.02	17.22	7.84	8.26	6.04	hypothetical protein
MGG_15705	gene-MGG_15705	0.400844	-1.31889	8.49e-25	5.45e-24	yes	down	7.18	3.22333	6.49	7.15	7.9	3.31	3.59	2.77	hypothetical protein
MGG_07887	gene-MGG_07887	0.400891	-1.31872	3.46e-07	9.98e-07	yes	down	3.16333	1.42667	3.3	3.39	2.8	1.37	1.67	1.24	hypothetical protein
MGG_09212	gene-MGG_09212	0.401546	-1.31636	1.4e-28	1.01e-27	yes	down	30.4	13.0333	30.92	32.51	27.77	14.27	13.78	11.05	nitroreductase
MGG_16847	gene-MGG_16847	0.401555	-1.31633	3.78e-08	1.17e-07	yes	down	5.15333	2.32667	5.96	5.09	4.41	2.34	2.32	2.32	hypothetical protein
MGG_09846	gene-MGG_09846	0.401994	-1.31475	1.47e-29	1.09e-28	yes	down	15.5333	7.02333	15.02	16.12	15.46	6.9	8.4	5.77	TPR repeat-containing protein
MGG_09852	gene-MGG_09852	0.402219	-1.31395	0.000154014	0.000350401	yes	down	1.85333	0.83	2.03	2.04	1.49	0.75	0.73	1.01	sugar transporter STL1
MGG_11193	gene-MGG_11193	0.403017	-1.31109	3.94e-23	2.4e-22	yes	down	20.9667	9.46667	21.13	18.93	22.84	9.38	9.48	9.54	bystin
MGG_01561	gene-MGG_01561	0.403047	-1.31098	3.83e-33	3.11e-32	yes	down	21.6067	9.70667	19.16	23.26	22.4	9.16	9.62	10.34	nucleolar GTP-binding protein 2
MGG_10253	gene-MGG_10253	0.403603	-1.30899	3.22e-46	3.48e-45	yes	down	104.717	50.0467	107.89	111.12	95.14	50.95	51.56	47.63	hypothetical protein
MGG_15492	gene-MGG_15492	0.403814	-1.30824	0.00211628	0.00420405	yes	down	1.59	0.743333	1.8	1.53	1.44	1.11	0.54	0.58	hypothetical protein
MGG_14715	gene-MGG_14715	0.404305	-1.30648	4.96e-127	1.65e-125	yes	down	2190.94	895.487	2062.71	2157.36	2352.76	979.06	878.83	828.57	hypothetical protein
MGG_15868	gene-MGG_15868	0.404335	-1.30638	3.27e-74	5.82e-73	yes	down	208.643	91.9933	196.65	216.86	212.42	87.8	91.9	96.28	argininosuccinate synthase
MGG_00309	gene-MGG_00309	0.404845	-1.30456	1.08e-42	1.08e-41	yes	down	52.9167	22.7833	51.82	54.97	51.96	24.66	18.34	25.35	carboxypeptidase S
MGG_09433	gene-MGG_09433	0.405348	-1.30277	5.78e-10	2e-09	yes	down	5.64667	2.55667	6	5.38	5.56	3.02	2.4	2.25	endoglucanase family 5 glycoside hydrolase
MGG_04626	gene-MGG_04626	0.405639	-1.30173	5.65e-41	5.47e-40	yes	down	79.2167	35.8667	77.29	83.54	76.82	34.82	34.79	37.99	6,7-dimethyl-8-ribityllumazine synthase
MGG_11149	gene-MGG_11149	0.40565	-1.30169	1.82e-59	2.57e-58	yes	down	125.257	57.03	114.6	135.09	126.08	63.42	58.43	49.24	hypothetical protein
MGG_08107	gene-MGG_08107	0.406151	-1.29991	1.61e-62	2.41e-61	yes	down	91.14	42.3233	92.06	91.17	90.19	39.43	41.83	45.71	hypothetical protein
MGG_03299	gene-MGG_03299	0.406249	-1.29956	0.00227019	0.00449214	yes	down	1.27	0.576667	0.82	1.61	1.38	0.52	0.73	0.48	phosphate:H+ symporter
MGG_03823	gene-MGG_03823	0.406946	-1.29709	8.15e-09	2.63e-08	yes	down	6.03333	2.75667	5.27	6.91	5.92	3.06	2.88	2.33	NADH oxidase
MGG_01042	gene-MGG_01042	0.406988	-1.29694	2.38e-34	1.99e-33	yes	down	34.5833	15.55	34.9	37.09	31.76	15.08	15.65	15.92	hypothetical protein
MGG_15272	gene-MGG_15272	0.407119	-1.29648	0.00107517	0.0022219	yes	down	0.28	0.126667	0.27	0.28	0.29	0.15	0.12	0.11	polyketide synthase
MGG_15094	gene-MGG_15094	0.407474	-1.29522	0.0043482	0.00827998	yes	down	1.7	0.783333	1.68	1.25	2.17	1.09	0.53	0.73	acetylcholinesterase
MGG_03205	gene-MGG_03205	0.407946	-1.29355	1.85e-80	3.65e-79	yes	down	143.277	65.4233	146.41	142.62	140.8	65.42	63.98	66.87	polyamine transporter 2
MGG_07465	gene-MGG_07465	0.408324	-1.29221	2.11e-27	1.48e-26	yes	down	16.94	7.77333	14.94	17.7	18.18	8.59	8.44	6.29	periodic tryptophan protein 2
MGG_12697	gene-MGG_12697	0.408575	-1.29133	5.64e-93	1.33e-91	yes	down	101.697	45.2833	96.72	104.41	103.96	49.12	45.32	41.41	hypothetical protein
MGG_01128	gene-MGG_01128	0.408931	-1.29007	4.72e-45	5.01e-44	yes	down	29.9267	13.7733	27.18	31.39	31.21	15.51	14.82	10.99	pentafunctional AROM polypeptide
MGG_03893	gene-MGG_03893	0.409004	-1.28981	6.82e-26	4.53e-25	yes	down	14.1	6.5	14.54	13.34	14.42	6.96	7.07	5.47	pre-mRNA-splicing factor ATP-dependent RNA helicase prp43
MGG_05340	gene-MGG_05340	0.409131	-1.28937	2.84e-16	1.34e-15	yes	down	8.83	4.05667	8.08	9.63	8.78	3.94	4.94	3.29	hypothetical protein
MGG_00776	gene-MGG_00776	0.409162	-1.28926	4e-45	4.25e-44	yes	down	62.5033	28.5867	62.31	65.65	59.55	30.02	26.04	29.7	Fe-S cluster assembly protein DRE2
MGG_10322	gene-MGG_10322	0.409203	-1.28911	3.19e-20	1.76e-19	yes	down	23.38	10.7667	25.77	21.56	22.81	12.55	9.76	9.99	cortical patch protein
MGG_08970	gene-MGG_08970	0.409966	-1.28642	9.7e-58	1.32e-56	yes	down	27.12	12.47	26.39	26.93	28.04	12.61	11.95	12.85	leptomycin B resistance protein pmd1
MGG_05817	gene-MGG_05817	0.410233	-1.28548	2.99e-42	2.99e-41	yes	down	35.3333	16.2233	34.78	34.35	36.87	15.64	16.78	16.25	nonsense-mediated mRNA decay protein 3
MGG_09290	gene-MGG_09290	0.410459	-1.28469	2.56e-13	1.06e-12	yes	down	13.43	6.19333	14.32	12.69	13.28	5.94	6.86	5.78	arginine N-methyltransferase 2
MGG_01182	gene-MGG_01182	0.410599	-1.2842	2.6e-06	7.02e-06	yes	down	6.07667	2.78333	5.28	7.33	5.62	1.99	3.76	2.6	glyoxylate reductase
MGG_14526	gene-MGG_14526	0.410959	-1.28293	1.18e-73	2.09e-72	yes	down	49.67	22.8467	47.9	51.62	49.49	23.3	22.59	22.65	cytosolic Fe-S cluster assembly factor nar-1
MGG_07560	gene-MGG_07560	0.411502	-1.28103	7.89e-35	6.66e-34	yes	down	221.287	101.56	233.52	217.75	212.59	99.09	87.95	117.64	hypothetical protein
MGG_17656	gene-MGG_17656	0.411538	-1.2809	3.44e-18	1.75e-17	yes	down	63.3667	29.1167	59.75	77.04	53.31	32.29	27.63	27.43	hypothetical protein
MGG_02001	gene-MGG_02001	0.411756	-1.28014	3.38e-23	2.07e-22	yes	down	21.18	9.75667	22.56	19.77	21.21	9.05	9.85	10.37	hypothetical protein
MGG_03291	gene-MGG_03291	0.411768	-1.2801	3.94e-32	3.1e-31	yes	down	17.1567	7.90333	15.84	18.21	17.42	7.51	8.56	7.64	SDA1 domain-containing protein
MGG_06319	gene-MGG_06319	0.411803	-1.27997	6.62e-48	7.44e-47	yes	down	79.6333	36.7233	79.54	77.63	81.73	37.84	35.68	36.65	ubiquitin C-terminal hydrolase L3
MGG_04311	gene-MGG_04311	0.411948	-1.27947	5.62e-65	8.77e-64	yes	down	99.25	45.8633	100.42	97	100.33	48.09	45.69	43.81	3',5'-bisphosphate nucleotidase
MGG_14883	gene-MGG_14883	0.412125	-1.27885	1.34e-33	1.09e-32	yes	down	76.5433	35.3367	76.65	74.88	78.1	37.55	33.57	34.89	methyltransferase small domain-containing protein
MGG_07326	gene-MGG_07326	0.412214	-1.27854	2.3e-25	1.5e-24	yes	down	23.69	11.0567	24.32	22.77	23.98	11.29	11.17	10.71	hypothetical protein
MGG_05136	gene-MGG_05136	0.41225	-1.27841	2.05e-19	1.11e-18	yes	down	26.66	12.36	26.83	27.4	25.75	14.73	11.51	10.84	pre-rRNA-processing protein PNO1
MGG_00840	gene-MGG_00840	0.412297	-1.27824	3.95e-22	2.33e-21	yes	down	18.06	8.39	17.26	19.7	17.22	9.48	9.23	6.46	hypothetical protein
MGG_10247	gene-MGG_10247	0.412371	-1.27798	0.000128243	0.000294673	yes	down	2.89333	1.32333	2.6	2.92	3.16	1.19	1.2	1.58	hypothetical protein
MGG_10713	gene-MGG_10713	0.412577	-1.27727	3.64e-07	1.05e-06	yes	down	8.11333	3.75	7.15	8.83	8.36	3.81	4.13	3.31	hypothetical protein
MGG_01013	gene-MGG_01013	0.412671	-1.27694	4.18e-73	7.36e-72	yes	down	168.64	78.11	168.3	168.34	169.28	75.41	87.4	71.52	eukaryotic translation initiation factor 3 39 kDa subunit
MGG_02489	gene-MGG_02489	0.4128	-1.27649	4.92e-83	1e-81	yes	down	145.497	67.2667	134.88	149.99	151.62	71.12	67.08	63.6	branched-chain-amino-acid aminotransferase
MGG_11916	gene-MGG_11916	0.41316	-1.27523	2.29e-92	5.34e-91	yes	down	182.003	84.19	183.3	184.91	177.8	84.58	84.7	83.29	CAP20
MGG_10254	gene-MGG_10254	0.413255	-1.2749	5.47e-08	1.68e-07	yes	down	8.45667	3.89667	8.63	9.42	7.32	3.07	4.36	4.26	hypothetical protein
MGG_14813	gene-MGG_14813	0.413335	-1.27462	5.75e-36	4.97e-35	yes	down	17.9433	8.32667	17.67	17.67	18.49	8.24	9.21	7.53	quinate repressor
MGG_08262	gene-MGG_08262	0.413534	-1.27392	3.04e-98	7.64e-97	yes	down	155.823	72.0967	154.3	157.14	156.03	72.35	77.7	66.24	putidaredoxin reductase
MGG_11179	gene-MGG_11179	0.413635	-1.27357	4.36e-09	1.43e-08	yes	down	26.6567	12.3633	20.24	30.51	29.22	15.32	11.47	10.3	hypothetical protein
MGG_11039	gene-MGG_11039	0.413922	-1.27257	7.01e-47	7.68e-46	yes	down	24.24	10.74	25.56	21.86	25.3	11.08	10.04	11.1	N-acetyltransferase 10
MGG_04764	gene-MGG_04764	0.413958	-1.27244	1.78e-84	3.73e-83	yes	down	169.507	78.56	165.51	170.25	172.76	81	76.75	77.93	cystathionine gamma-synthase
MGG_00645	gene-MGG_00645	0.414469	-1.27066	5.52e-21	3.14e-20	yes	down	15.4733	7.2	14	16.99	15.43	6.66	8.88	6.06	phosphopantothenoylcysteine decarboxylase
MGG_10664	gene-MGG_10664	0.414624	-1.27012	3.73e-15	1.68e-14	yes	down	4.6	2.14333	4.16	4.77	4.87	2.36	2.26	1.81	hypothetical protein
MGG_09858	gene-MGG_09858	0.415073	-1.26856	4.27e-07	1.22e-06	yes	down	8.54667	4.05	9.12	8.08	8.44	4.51	4.27	3.37	hypothetical protein
MGG_05722	gene-MGG_05722	0.415518	-1.26702	3.93e-06	1.05e-05	yes	down	2.36667	1.09667	2.19	2.97	1.94	1.17	0.94	1.18	hypothetical protein
MGG_10674	gene-MGG_10674	0.415894	-1.26571	1.24e-29	9.24e-29	yes	down	14.8333	6.91	14.6	15.93	13.97	6.92	7.34	6.47	hypothetical protein
MGG_08768	gene-MGG_08768	0.416057	-1.26515	2.82e-22	1.67e-21	yes	down	21.9633	10.2367	21.97	22.12	21.8	9.85	10.9	9.96	methyltransferase-UbiE family protein
MGG_09502	gene-MGG_09502	0.416205	-1.26463	1.03e-65	1.63e-64	yes	down	58.8733	26.1433	56.56	61.85	58.21	26.49	27.01	24.93	quinidine resistance
MGG_15036	gene-MGG_15036	0.416495	-1.26363	1.2e-26	8.17e-26	yes	down	196.903	89.7133	195.05	202.05	193.61	92.3	73.73	103.11	RO10
MGG_06931	gene-MGG_06931	0.417163	-1.26132	7.37e-29	5.34e-28	yes	down	22.0533	10.34	21.45	22.18	22.53	10.78	11.28	8.96	glycoprotein endopeptidase kae-1
MGG_00391	gene-MGG_00391	0.417255	-1.261	2.49e-27	1.74e-26	yes	down	66.9567	31.4833	72.72	67.77	60.38	35.48	33.04	25.93	hypothetical protein
MGG_16096	gene-MGG_16096	0.417717	-1.2594	1.08e-15	4.96e-15	yes	down	11.89	5.65333	13.51	11.91	10.25	6.41	4.6	5.95	hypothetical protein
MGG_11450	gene-MGG_11450	0.418052	-1.25824	1.23e-46	1.34e-45	yes	down	85.5933	33.0267	85.25	85.35	86.18	34.2	29.71	35.17	homoserine dehydrogenase
MGG_03597	gene-MGG_03597	0.418199	-1.25774	4.38e-21	2.5e-20	yes	down	11.0967	5.23667	11.51	10.81	10.97	6.09	5.4	4.22	hypothetical protein
MGG_17175	gene-MGG_17175	0.418369	-1.25715	1.21e-06	3.33e-06	yes	down	20.4067	9.62	20.32	23.94	16.96	10.05	6.72	12.09	hypothetical protein
MGG_11308	gene-MGG_11308	0.41849	-1.25673	5.94e-07	1.68e-06	yes	down	4.52333	2.12	5.1	4.61	3.86	1.96	2.31	2.09	zinc-binding alcohol dehydrogenase domain-containing protein 1
MGG_08800	gene-MGG_08800	0.418769	-1.25577	8.37e-26	5.56e-25	yes	down	14.7567	6.85	14.04	14.22	16.01	5.89	7.17	7.49	CAIB/BAIF family enzyme
MGG_04476	gene-MGG_04476	0.419265	-1.25407	5.07e-68	8.29e-67	yes	down	125.997	59.1067	114.34	130.94	132.71	57.6	62.4	57.32	FK506-binding protein 4
MGG_02432	gene-MGG_02432	0.419456	-1.25341	4.28e-69	7.12e-68	yes	down	86.3467	40.67	80.09	86.72	92.23	42.37	43.91	35.73	leucyl-tRNA synthetase
MGG_13928	gene-MGG_13928	0.419558	-1.25306	1.08e-71	1.88e-70	yes	down	120.42	56.5133	119.47	123.93	117.86	57.26	54.72	57.56	benzoate 4-monooxygenase
MGG_01566	gene-MGG_01566	0.42057	-1.24958	9.1e-37	8.05e-36	yes	down	71.0867	33.3367	70.4	73.95	68.91	31.16	31.51	37.34	homoisocitrate dehydrogenase
MGG_05440	gene-MGG_05440	0.420954	-1.24827	4.13e-50	4.83e-49	yes	down	56.32	26.52	56.48	56.49	55.99	26.32	26.07	27.17	galactokinase
MGG_16184	gene-MGG_16184	0.421131	-1.24766	0.00831313	0.0152582	yes	down	2.86	1.40333	5.11	1.2	2.27	1.24	1.61	1.36	hypothetical protein
MGG_05961	gene-MGG_05961	0.421239	-1.24729	1.65e-39	1.56e-38	yes	down	34.07	15.7133	32.83	35.51	33.87	16.54	16.32	14.28	hypothetical protein
MGG_09743	gene-MGG_09743	0.42128	-1.24715	8.33e-99	2.11e-97	yes	down	764.19	364.953	766.39	752.51	773.67	367.18	369.63	358.05	hypothetical protein
MGG_15037	gene-MGG_15037	0.42136	-1.24687	4.18e-86	8.98e-85	yes	down	40.69	19.15	39.02	41.98	41.07	18.96	19.95	18.54	hypothetical protein
MGG_00385	gene-MGG_00385	0.421561	-1.24619	1.23e-09	4.18e-09	yes	down	2.97667	1.40667	3.15	3.22	2.56	1.57	1.23	1.42	L-aminoadipate-semialdehyde dehydrogenase
MGG_16374	gene-MGG_16374	0.421993	-1.24471	6.04e-48	6.79e-47	yes	down	158.713	74.8167	162.8	160.94	152.4	69.73	73.65	81.07	hypothetical protein
MGG_01256	gene-MGG_01256	0.422188	-1.24404	6.86e-38	6.22e-37	yes	down	37.4	17.6333	36.29	37.71	38.2	16.43	17.75	18.72	phosphoribosylaminoimidazole carboxylase
MGG_04523	gene-MGG_04523	0.42227	-1.24376	2.91e-16	1.37e-15	yes	down	7.90333	3.73	6.85	8.58	8.28	3.46	4.26	3.47	ATP-dependent RNA helicase ROK1
MGG_07463	gene-MGG_07463	0.422543	-1.24283	1.87e-23	1.15e-22	yes	down	19.5933	9.24667	18.78	18.91	21.09	8.68	9.28	9.78	D-galacturonic acid reductase
MGG_04467	gene-MGG_04467	0.422792	-1.24198	1.13e-67	1.83e-66	yes	down	966.67	456.907	952.37	962.52	985.12	421.73	465.74	483.25	60S acidic ribosomal protein P0
MGG_16453	gene-MGG_16453	0.423382	-1.23997	7.92e-15	3.5e-14	yes	down	3.29	1.56333	3.14	3.48	3.25	1.35	1.91	1.43	hypothetical protein
MGG_04212	gene-MGG_04212	0.423398	-1.23991	6.56e-115	1.94e-113	yes	down	885.813	420.197	874.84	873.35	909.25	424.92	423.16	412.51	L-ornithine 5-monooxygenase (L-ornithine N(5)-oxygenase)
MGG_12230	gene-MGG_12230	0.423579	-1.2393	8.17e-07	2.28e-06	yes	down	15.5333	7.37	13.13	14.46	19.01	7.22	8.04	6.85	hypothetical protein
MGG_01233	gene-MGG_01233	0.424059	-1.23766	1.79e-101	4.65e-100	yes	down	218.18	104.073	213.54	222.3	218.7	106.94	103.19	102.09	hypothetical protein
MGG_02004	gene-MGG_02004	0.424101	-1.23752	0.00143851	0.0029244	yes	down	10.54	4.95667	6.48	15.35	9.79	6.14	5.02	3.71	hypothetical protein
MGG_06952	gene-MGG_06952	0.424197	-1.23719	2.54e-69	4.23e-68	yes	down	826.443	393.15	854.37	786.84	838.12	388.01	406.38	385.06	ribosomal protein L38e
MGG_16077	gene-MGG_16077	0.424387	-1.23655	3.43e-06	9.17e-06	yes	down	9.05333	4.30667	10.28	8.54	8.34	4.03	4.85	4.04	hypothetical protein
MGG_08562	gene-MGG_08562	0.424445	-1.23635	7.11e-11	2.6e-10	yes	down	4.36333	2.07667	4.21	4.39	4.49	2.16	2.13	1.94	NAD-dependent malic enzyme
MGG_09752	gene-MGG_09752	0.424926	-1.23472	7.7e-21	4.34e-20	yes	down	16.74	7.92333	16.22	17.23	16.77	7.34	7.58	8.85	hypothetical protein
MGG_17936	gene-MGG_17936	0.425262	-1.23358	1.64e-26	1.12e-25	yes	down	30.9233	14.7433	30.42	33.08	29.27	16.77	13.7	13.76	hypothetical protein
MGG_06770	gene-MGG_06770	0.425394	-1.23313	7.45e-28	5.28e-27	yes	down	33.9933	16.25	33.11	33.53	35.34	17.48	16.91	14.36	hypothetical protein
MGG_04612	gene-MGG_04612	0.426311	-1.23002	4.14e-67	6.64e-66	yes	down	1036.01	493.217	1032.94	1037.09	1038	450.66	512.68	516.31	60S ribosomal protein L8-B
MGG_13217	gene-MGG_13217	0.426333	-1.22995	2.74e-30	2.07e-29	yes	down	25.04	11.9767	22.11	25.13	27.88	11.69	13.79	10.45	tRNA (cytosine-5-)-methyltransferase NCL1
MGG_06903	gene-MGG_06903	0.42643	-1.22962	5.49e-11	2.02e-10	yes	down	14.6767	6.98	10.29	18.25	15.49	7.4	6.93	6.61	hypothetical protein
MGG_04003	gene-MGG_04003	0.426462	-1.22951	1.45e-12	5.79e-12	yes	down	14.2167	6.77667	11.83	15.96	14.86	7.11	7.03	6.19	hypothetical protein
MGG_06382	gene-MGG_06382	0.427234	-1.2269	7.7e-05	0.000180851	yes	down	2.24667	1.08667	2.26	2.19	2.29	1.13	1.05	1.08	CAMK/CAMK1 protein kinase
MGG_03554	gene-MGG_03554	0.427305	-1.22666	5.48e-85	1.16e-83	yes	down	731.307	350.43	735.7	727.41	730.81	334.81	380.78	335.7	60S ribosomal protein L36
MGG_01864	gene-MGG_01864	0.427436	-1.22622	1.35e-06	3.72e-06	yes	down	12.5067	5.99667	12.21	12.33	12.98	6.82	5.64	5.53	hypothetical protein
MGG_00858	gene-MGG_00858	0.428348	-1.22315	4.91e-44	5.11e-43	yes	down	320.37	153.06	332.99	319.75	308.37	142.82	175.04	141.32	hypothetical protein
MGG_01709	gene-MGG_01709	0.428467	-1.22274	2.63e-17	1.3e-16	yes	down	19.7333	8.99333	18.4	20.45	20.35	9.32	8.7	8.96	hypothetical protein
MGG_00652	gene-MGG_00652	0.428644	-1.22215	1.19e-27	8.4e-27	yes	down	21.98	10.53	22.32	22.87	20.75	11.03	9.39	11.17	salicylaldehyde dehydrogenase
MGG_05175	gene-MGG_05175	0.42871	-1.22193	5.48e-37	4.87e-36	yes	down	51.29	24.5767	51.62	53.38	48.87	24.58	23.44	25.71	epoxide hydrolase 2
MGG_05187	gene-MGG_05187	0.428731	-1.22186	4.9e-26	3.27e-25	yes	down	151.403	72.7067	143.99	165.01	145.21	81.34	57.99	78.79	hypothetical protein
MGG_01315	gene-MGG_01315	0.429327	-1.21985	3.24e-12	1.27e-11	yes	down	9.35667	4.52333	10.46	9.08	8.53	4.3	4.89	4.38	hypothetical protein
MGG_03103	gene-MGG_03103	0.429489	-1.21931	5.42e-06	1.42e-05	yes	down	4.13333	1.97333	2.47	5.79	4.14	1.79	2.02	2.11	high-affinity methionine permease
MGG_01417	gene-MGG_01417	0.429718	-1.21854	4.91e-07	1.4e-06	yes	down	3.66	1.75	3.68	3.67	3.63	1.53	1.7	2.02	hypothetical protein
MGG_10560	gene-MGG_10560	0.430068	-1.21736	2.04e-05	5.06e-05	yes	down	5.65333	2.70333	5.13	6.68	5.15	3.09	2.1	2.92	N-acetyltransferase
MGG_03095	gene-MGG_03095	0.430197	-1.21693	2.28e-16	1.08e-15	yes	down	12.5667	6.02667	12.29	12.59	12.82	6.37	4.87	6.84	dihydroxyacetone kinase
MGG_17186	gene-MGG_17186	0.430333	-1.21647	5.82e-102	1.52e-100	yes	down	14169.1	6937.58	13335.1	14441.2	14731	7165.75	7508.38	6138.6	hypothetical protein
MGG_14800	gene-MGG_14800	0.430393	-1.21627	2.97e-25	1.93e-24	yes	down	22.8367	11.05	20.45	22.95	25.11	11.71	12.28	9.16	hypothetical protein
MGG_16601	gene-MGG_16601	0.430483	-1.21597	1.8e-15	8.14e-15	yes	down	14.0967	6.75	13.94	14.68	13.67	6.54	5.9	7.81	hypothetical protein
MGG_16204	gene-MGG_16204	0.43101	-1.21421	3.48e-60	4.98e-59	yes	down	1226.57	580.113	1225.05	1202.55	1252.11	542.89	579.24	618.21	60S ribosomal protein L12
MGG_05630	gene-MGG_05630	0.4312	-1.21357	5.69e-64	8.71e-63	yes	down	65.2467	31.5467	59.95	70.16	65.63	31.65	34.46	28.53	AMP deaminase 2
MGG_03729	gene-MGG_03729	0.431435	-1.21278	1.04e-07	3.14e-07	yes	down	5.03	2.40667	3.58	5.62	5.89	1.93	2.67	2.62	CAMK/CAMKL/CHK1 protein kinase
MGG_07524	gene-MGG_07524	0.431694	-1.21192	3.49e-21	2e-20	yes	down	19.4533	9.42667	19.69	19.25	19.42	9.27	10.29	8.72	hypothetical protein
MGG_02620	gene-MGG_02620	0.431906	-1.21121	1.76e-78	3.36e-77	yes	down	823.613	399.273	849.2	793.04	828.6	391.26	429.75	376.81	60S ribosomal protein L37
MGG_00282	gene-MGG_00282	0.432413	-1.20952	1.13e-05	2.88e-05	yes	down	2.00333	0.963333	1.73	2.19	2.09	1.04	0.76	1.09	subtilisin
MGG_07408	gene-MGG_07408	0.432626	-1.20881	2.93e-14	1.26e-13	yes	down	3.41	1.66667	3.77	3.53	2.93	2	1.65	1.35	NACHT and TPR domain-containing protein
MGG_00993	gene-MGG_00993	0.432788	-1.20827	3.75e-21	2.15e-20	yes	down	17.2933	8.37333	18.1	16.38	17.4	7.44	9	8.68	vacuolar iron transporter Ccc1
MGG_14856	gene-MGG_14856	0.432915	-1.20784	8.09e-13	3.28e-12	yes	down	18.0867	8.71	16.82	19.41	18.03	8.93	9.5	7.7	hypothetical protein
MGG_07525	gene-MGG_07525	0.432949	-1.20773	5.51e-37	4.89e-36	yes	down	37.9233	18.35	32.8	42.15	38.82	18.11	19.3	17.64	hypothetical protein
MGG_01931	gene-MGG_01931	0.432968	-1.20767	9.34e-87	2.03e-85	yes	down	1149.45	557.067	1131.48	1126.26	1190.61	559.85	545.69	565.66	siderophore iron transporter mirB
MGG_06991	gene-MGG_06991	0.433517	-1.20584	1.17e-52	1.45e-51	yes	down	80.6067	38.32	84.76	78.45	78.61	38.25	41.11	35.6	hypothetical protein
MGG_06880	gene-MGG_06880	0.433694	-1.20525	8.81e-19	4.63e-18	yes	down	19.7833	9.71333	21.36	19.22	18.77	10.84	9.52	8.78	phytanoyl-CoA dioxygenase
MGG_09195	gene-MGG_09195	0.433805	-1.20488	2.83e-72	4.95e-71	yes	down	184.757	89.77	181.13	182.12	191.02	91.65	89.28	88.38	rRNA 2'-O-methyltransferase fibrillarin
MGG_04425	gene-MGG_04425	0.434268	-1.20334	3.95e-78	7.52e-77	yes	down	160.357	78.09	155.03	160.99	165.05	80.12	81.32	72.83	phenylalanyl-tRNA synthetase subunit alpha
MGG_00349	gene-MGG_00349	0.434456	-1.20272	3.35e-87	7.33e-86	yes	down	773.147	375.927	752.37	779.94	787.13	359.28	390.43	378.07	40S ribosomal protein S13
MGG_06644	gene-MGG_06644	0.43449	-1.2026	1.86e-55	2.47e-54	yes	down	54.86	26.33	56.31	53.85	54.42	26.96	27.24	24.79	tartrate transporter
MGG_06522	gene-MGG_06522	0.435011	-1.20088	8.26e-29	5.96e-28	yes	down	23.3133	11.3667	24.47	23.23	22.24	11.55	11.3	11.25	ATP-dependent RNA helicase HAS1
MGG_11146	gene-MGG_11146	0.435081	-1.20065	5.15e-52	6.28e-51	yes	down	302.653	148.19	313.38	289.25	305.33	162.13	156.7	125.74	hypothetical protein
MGG_14976	gene-MGG_14976	0.435118	-1.20052	1.3e-25	8.57e-25	yes	down	47.4367	23.01	48.98	49.11	44.22	20.18	22.64	26.21	hypothetical protein
MGG_04444	gene-MGG_04444	0.43549	-1.19929	6.4e-86	1.37e-84	yes	down	761.113	371.057	757.82	751.37	774.15	361.93	376.36	374.88	60S ribosomal protein L6-B
MGG_14930	gene-MGG_14930	0.435535	-1.19914	1.24e-11	4.71e-11	yes	down	8	3.58	7.6	8.08	8.32	3.37	3.75	3.62	FAD dependent oxidoreductase superfamily protein
MGG_01743	gene-MGG_01743	0.435558	-1.19906	9.23e-46	9.9e-45	yes	down	49.5633	24.15	48.74	49.53	50.42	24	23.65	24.8	carbamoyl-phosphate synthase subunit arginine-specific small
MGG_16528	gene-MGG_16528	0.435577	-1.199	8.88e-17	4.27e-16	yes	down	33.82	16.5267	36.53	34.58	30.35	17	16.74	15.84	hypothetical protein
MGG_15353	gene-MGG_15353	0.436015	-1.19755	7.49e-05	0.000176015	yes	down	2.57333	1.24	1.91	3.03	2.78	0.99	1.25	1.48	hypothetical protein
MGG_05714	gene-MGG_05714	0.436921	-1.19456	2.48e-08	7.77e-08	yes	down	2.11667	1.02333	2.13	2.11	2.11	1.07	1.28	0.72	hypothetical protein
MGG_02953	gene-MGG_02953	0.436995	-1.19431	4.86e-72	8.48e-71	yes	down	761.25	372.623	772.67	765.41	745.67	345.4	400.58	371.89	60S ribosomal protein L21-B
MGG_07810	gene-MGG_07810	0.437181	-1.1937	6.3e-45	6.67e-44	yes	down	4215.67	2057.66	4198.83	4156.42	4291.77	1968.33	1909.33	2295.31	hypothetical protein
MGG_08973	gene-MGG_08973	0.437429	-1.19288	8.69e-53	1.08e-51	yes	down	46.64	26.1267	44.66	48.93	46.33	24.83	27.05	26.5	hypothetical protein
MGG_05958	gene-MGG_05958	0.438086	-1.19071	6.42e-42	6.34e-41	yes	down	73.7733	36.4167	71.48	75.72	74.12	38.04	35.01	36.2	hypothetical protein
MGG_07756	gene-MGG_07756	0.438115	-1.19062	9.38e-93	2.2e-91	yes	down	120.407	59.2267	117.68	121.87	121.67	61.43	62.96	53.29	pyruvate carboxylase
MGG_05597	gene-MGG_05597	0.438144	-1.19052	1.78e-37	1.6e-36	yes	down	69.9067	34.3833	69.93	68.52	71.27	33.61	37.98	31.56	hypothetical protein
MGG_06333	gene-MGG_06333	0.438234	-1.19023	4.65e-88	1.03e-86	yes	down	1402.55	688.237	1335.3	1396.51	1475.84	697.53	702.72	664.46	60S ribosomal protein L29
MGG_05791	gene-MGG_05791	0.438772	-1.18846	3.98e-60	5.68e-59	yes	down	2553.75	1253.69	2585.24	2485.02	2590.98	1319.13	1157.32	1284.63	hypothetical protein
MGG_03757	gene-MGG_03757	0.438783	-1.18842	1.57e-11	5.92e-11	yes	down	9.40667	4.61	9.9	9.05	9.27	3.81	4.97	5.05	hypothetical protein
MGG_14595	gene-MGG_14595	0.438819	-1.1883	2.27e-22	1.35e-21	yes	down	34.54	15.5333	33.64	36.65	33.33	16.02	14.39	16.19	hypothetical protein
MGG_07135	gene-MGG_07135	0.439838	-1.18496	5.88e-39	5.48e-38	yes	down	114.423	56.4633	110.4	115.49	117.38	61.14	57.13	51.12	orotate phosphoribosyltransferase
MGG_13438	gene-MGG_13438	0.440434	-1.183	8.49e-67	1.35e-65	yes	down	112.527	55.5967	114.81	110.58	112.19	54.09	56.9	55.8	xaa-Pro dipeptidase
MGG_15294	gene-MGG_15294	0.440817	-1.18175	4.61e-39	4.31e-38	yes	down	87.3867	40.8067	91.41	85.52	85.23	37.53	38.54	46.35	proline iminopeptidase
MGG_01723	gene-MGG_01723	0.440928	-1.18138	2.29e-29	1.69e-28	yes	down	23.8567	11.82	22.65	25.43	23.49	12.85	12.41	10.2	cytochrome b2
MGG_09540	gene-MGG_09540	0.441562	-1.17931	1.62e-73	2.86e-72	yes	down	107.877	61.6967	99.95	112.49	111.19	64.28	60.79	60.02	tryptophanyl-tRNA synthetase
MGG_13429	gene-MGG_13429	0.441579	-1.17926	1.3e-17	6.48e-17	yes	down	8.84333	4.38667	8.17	9.35	9.01	5.01	4.28	3.87	glycoside hydrolase
MGG_07528	gene-MGG_07528	0.441594	-1.17921	7.2e-50	8.39e-49	yes	down	96.37	47.5967	95.26	96.36	97.49	45.17	48.79	48.83	imidazoleglycerol-phosphate dehydratase
MGG_10827	gene-MGG_10827	0.442014	-1.17784	2.93e-75	5.32e-74	yes	down	3003.93	1478.43	2945.83	3012.96	3052.99	1378.71	1528.25	1528.34	hypothetical protein
MGG_05874	gene-MGG_05874	0.442061	-1.17768	1.55e-13	6.48e-13	yes	down	7.42333	3.69	7.12	7.56	7.59	3.53	3.75	3.79	hypothetical protein
MGG_15418	gene-MGG_15418	0.442102	-1.17755	3.08e-05	7.52e-05	yes	down	7.32	3.6	6.2	7.74	8.02	3.7	3.22	3.88	hypothetical protein
MGG_08705	gene-MGG_08705	0.442168	-1.17733	4.8e-09	1.57e-08	yes	down	7.42	3.64333	6.68	7.84	7.74	2.83	4	4.1	methyltransferase
MGG_10704	gene-MGG_10704	0.442423	-1.1765	5.11e-51	6.11e-50	yes	down	142.657	70.62	138.34	142.86	146.77	71.88	69.33	70.65	hypothetical protein
MGG_06479	gene-MGG_06479	0.442643	-1.17578	1.91e-62	2.84e-61	yes	down	1346.43	665.523	1313.4	1376.93	1348.97	676.95	634.6	685.02	40S ribosomal protein S22
MGG_08584	gene-MGG_08584	0.443382	-1.17338	9.77e-62	1.44e-60	yes	down	105.377	52.3967	98.43	107.91	109.79	58.07	50.75	48.37	aconitate hydratase
MGG_04336	gene-MGG_04336	0.4434	-1.17332	2.03e-31	1.58e-30	yes	down	58.98	29.1567	52.51	64.06	60.37	29.5	26.98	30.99	hypothetical protein
MGG_12108	gene-MGG_12108	0.443527	-1.17291	3.93e-43	4e-42	yes	down	32.3533	16.2567	30.57	33.87	32.62	16.53	17.48	14.76	leucine Rich Repeat domain-containing protein
MGG_15696	gene-MGG_15696	0.443679	-1.17241	5.1e-09	1.67e-08	yes	down	8.26333	4.14333	8.15	9.07	7.57	4.63	4.95	2.85	mRNA decapping hydrolase
MGG_01809	gene-MGG_01809	0.443775	-1.1721	0.000999792	0.00207542	yes	down	9.85667	4.90333	10.28	10.27	9.02	8.13	1.99	4.59	haloacid dehalogenase
MGG_07779	gene-MGG_07779	0.444102	-1.17104	6.47e-06	1.69e-05	yes	down	3.27	1.63	3.84	3.34	2.63	1.68	1.52	1.69	quinate permease
MGG_16741	gene-MGG_16741	0.444249	-1.17056	0.0217566	0.0373623	yes	down	2.05667	1.02333	1.35	2.43	2.39	1.13	1.22	0.72	hypothetical protein
MGG_09935	gene-MGG_09935	0.444745	-1.16895	1.18e-54	1.53e-53	yes	down	35.28	17.3733	35.63	35.69	34.52	18.31	18.36	15.45	serine/threonine-protein phosphatase 2A activator 2
MGG_06657	gene-MGG_06657	0.444929	-1.16835	1.08e-94	2.64e-93	yes	down	1639.36	817.35	1625.82	1648.68	1643.59	782.59	874.24	795.22	40S ribosomal protein S25
MGG_11688	gene-MGG_11688	0.445074	-1.16788	3.59e-08	1.11e-07	yes	down	32.6833	16.2133	29.58	35.05	33.42	17.08	14.5	17.06	hypothetical protein
MGG_03727	gene-MGG_03727	0.445173	-1.16756	6.16e-113	1.78e-111	yes	down	1335.72	671.03	1317.92	1340.05	1349.2	685.68	690.39	637.02	50S ribosomal protein L31e
MGG_04466	gene-MGG_04466	0.445269	-1.16725	3.14e-53	3.93e-52	yes	down	51.2	25.6633	46.43	52.05	55.12	28.27	26.26	22.46	DNA mismatch repair protein mutS
MGG_08077	gene-MGG_08077	0.445284	-1.1672	4.75e-12	1.85e-11	yes	down	8.68333	4.31667	7.18	9.13	9.74	4.03	4.6	4.32	hypothetical protein
MGG_08190	gene-MGG_08190	0.445373	-1.16691	3.3e-65	5.18e-64	yes	down	432.78	214.403	457.4	418.44	422.5	205.3	226.03	211.88	60S ribosomal protein L4-A
MGG_16630	gene-MGG_16630	0.445576	-1.16626	1.1e-57	1.49e-56	yes	down	261.613	130.483	272.52	257.49	254.83	129.5	127.66	134.29	3-hydroxybutyryl-CoA dehydrogenase
MGG_05231	gene-MGG_05231	0.445797	-1.16554	4.21e-26	2.82e-25	yes	down	84.6767	42.2667	92.4	82.51	79.12	40.97	41.51	44.32	3-oxoadipate enol-lactonase
MGG_07258	gene-MGG_07258	0.445812	-1.16549	2.95e-17	1.45e-16	yes	down	9.51667	4.77	10.22	8.86	9.47	4.59	5.41	4.31	U3 small nucleolar ribonucleoprotein mpp10
MGG_09194	gene-MGG_09194	0.44603	-1.16479	1.15e-99	2.93e-98	yes	down	1166.37	582.327	1134.36	1177.13	1187.63	585.76	582.04	579.18	60S ribosomal protein L17
MGG_12222	gene-MGG_12222	0.446043	-1.16474	0.0195192	0.0337768	yes	down	1.20333	0.6	1.11	0.94	1.56	0.37	0.9	0.53	F-box domain-containing protein
MGG_00456	gene-MGG_00456	0.446142	-1.16442	4.46e-27	3.08e-26	yes	down	16.9033	8.30667	15.55	18.08	17.08	9.54	9.3	6.08	BTB domain and ankyrin repeat protein
MGG_09785	gene-MGG_09785	0.446309	-1.16388	3.19e-06	8.54e-06	yes	down	8.39	4.20333	8.5	8.78	7.89	4.86	3.84	3.91	hypothetical protein
MGG_03302	gene-MGG_03302	0.446666	-1.16273	2.65e-17	1.31e-16	yes	down	9.08333	4.53	7.94	9.8	9.51	4.4	5.1	4.09	hypothetical protein
MGG_12868	gene-MGG_12868	0.446839	-1.16217	6.9e-71	1.18e-69	yes	down	154.113	77.2267	151.19	151.18	159.97	80.77	77.77	73.14	enoyl-CoA hydratase
MGG_09526	gene-MGG_09526	0.447245	-1.16086	8.24e-25	5.3e-24	yes	down	36.8067	19.23	33.46	39.46	37.5	21.83	19.65	16.21	hypothetical protein
MGG_07200	gene-MGG_07200	0.447416	-1.16031	4.06e-102	1.06e-100	yes	down	1240.2	623.127	1245.14	1254.77	1220.69	655.46	654.41	559.51	plasma membrane ATPase
MGG_04921	gene-MGG_04921	0.447692	-1.15942	2.89e-64	4.44e-63	yes	down	658.5	330.043	676.28	648.9	650.32	311.91	339.9	338.32	60S ribosomal protein L23
MGG_06552	gene-MGG_06552	0.447867	-1.15886	8.79e-08	2.66e-07	yes	down	4.34333	2.18667	4.32	4.06	4.65	2.52	2.11	1.93	monooxygenase
MGG_03135	gene-MGG_03135	0.448006	-1.15841	1.52e-87	3.35e-86	yes	down	1265.5	635.76	1301.06	1262.5	1232.94	647.65	656.62	603.01	60S ribosomal protein L30
MGG_07663	gene-MGG_07663	0.448344	-1.15732	1.74e-35	1.49e-34	yes	down	24.55	12.1667	23.46	25.89	24.3	13.06	12.08	11.36	tRNA pseudouridine synthase 1
MGG_13262	gene-MGG_13262	0.448372	-1.15723	1.43e-40	1.37e-39	yes	down	54.4633	27.2533	52.93	57.22	53.24	27.7	24.98	29.08	FAD binding domain-containing protein
MGG_17858	gene-MGG_17858	0.448601	-1.1565	5.75e-16	2.67e-15	yes	down	22.5033	11.27	23.37	21.73	22.41	11.3	9.85	12.66	hypothetical protein
MGG_00546	gene-MGG_00546	0.448743	-1.15604	1.2e-71	2.07e-70	yes	down	1422.1	715.797	1443.33	1422.81	1400.17	623.79	725.05	798.55	60S ribosomal protein L44
MGG_07008	gene-MGG_07008	0.448785	-1.1559	4.05e-66	6.44e-65	yes	down	67.5833	33.98	66.09	69.72	66.94	33.87	35.52	32.55	nucleolar protein nop-58
MGG_11785	gene-MGG_11785	0.448846	-1.15571	2.39e-70	4.07e-69	yes	down	1339.17	672.19	1300.33	1355.69	1361.48	628.41	691.63	696.53	60S ribosomal protein L15
MGG_13645	gene-MGG_13645	0.449031	-1.15511	4.81e-69	8e-68	yes	down	836.683	420.81	856.72	841.45	811.88	393.75	447.27	421.41	50S ribosomal protein L13e
MGG_04829	gene-MGG_04829	0.449398	-1.15393	4.82e-100	1.23e-98	yes	down	1030.96	519.03	1017.11	1029.45	1046.33	511.34	537.66	508.09	60S ribosomal protein L9-A
MGG_05054	gene-MGG_05054	0.449709	-1.15294	9.59e-10	3.27e-09	yes	down	12.1533	5.69667	13.36	11.94	11.16	6.09	5.11	5.89	hypothetical protein
MGG_06500	gene-MGG_06500	0.449874	-1.15241	1.18e-23	7.36e-23	yes	down	31.54	18.5633	34.62	31.35	28.65	16.63	25.62	13.44	WD repeat-containing protein
MGG_17274	gene-MGG_17274	0.450002	-1.152	1.06e-56	1.43e-55	yes	down	244.053	127.337	256.91	231.17	244.08	117.79	128.72	135.5	hypothetical protein
MGG_01567	gene-MGG_01567	0.450994	-1.14882	1.83e-05	4.58e-05	yes	down	14.7933	7.58667	17.92	12.16	14.3	8.28	9.14	5.34	hypothetical protein
MGG_08936	gene-MGG_08936	0.451354	-1.14767	8.6e-53	1.07e-51	yes	down	50.1967	25.3867	47.85	56.38	46.36	26.21	25.72	24.23	hypothetical protein
MGG_02836	gene-MGG_02836	0.451364	-1.14764	1.93e-79	3.73e-78	yes	down	193.923	98.0333	191.59	195.45	194.73	101.95	95.5	96.65	2-methylcitrate dehydratase
MGG_07136	gene-MGG_07136	0.451899	-1.14593	2.58e-64	3.98e-63	yes	down	52.2633	23.3633	49.48	54.51	52.8	24.54	24.25	21.3	nucleolar GTP-binding protein 1
MGG_07233	gene-MGG_07233	0.452063	-1.14541	2.13e-29	1.57e-28	yes	down	23.6533	11.9533	21.56	25.57	23.83	11.51	12.67	11.68	hypothetical protein
MGG_01000	gene-MGG_01000	0.452205	-1.14495	1.42e-20	7.92e-20	yes	down	15.82	8.04667	13.72	17.19	16.55	8.66	9.12	6.36	small nucleolar ribonucleoprotein complex subunit Utp14
MGG_01385	gene-MGG_01385	0.452216	-1.14491	1.14e-67	1.84e-66	yes	down	124.61	63.12	125.7	123.4	124.73	64.51	62.11	62.74	choline transporter
MGG_04738	gene-MGG_04738	0.452322	-1.14458	5.31e-30	3.99e-29	yes	down	59.1667	29.8933	57.55	63.88	56.07	27.76	31.19	30.73	short chain dehydrogenase/oxidoreductase
MGG_07485	gene-MGG_07485	0.45259	-1.14372	0.00149256	0.00302963	yes	down	1.76333	0.89	1.35	1.95	1.99	0.78	1.13	0.76	dicarboxylic amino acid permease
MGG_01601	gene-MGG_01601	0.453059	-1.14223	3.71e-42	3.7e-41	yes	down	77.24	39.38	76.02	77.9	77.8	39.39	46.19	32.56	hypothetical protein
MGG_16069	gene-MGG_16069	0.453342	-1.14133	0.00961183	0.0174788	yes	down	1.79667	0.93	1.43	2.12	1.84	1.26	1.1	0.43	hypothetical protein
MGG_01009	gene-MGG_01009	0.453422	-1.14107	6.13e-79	1.18e-77	yes	down	747.81	392.887	745.44	763.17	734.82	400.77	386.25	391.64	hypothetical protein
MGG_05215	gene-MGG_05215	0.453914	-1.13951	1.31e-13	5.46e-13	yes	down	14.11	7.29333	14.65	15.63	12.05	7.03	6.51	8.34	cytochrome P450 71A23
MGG_08271	gene-MGG_08271	0.454107	-1.1389	3.27e-27	2.27e-26	yes	down	26.51	13.3933	23.95	28.93	26.65	14.32	12.4	13.46	oligosaccharide translocation protein RFT1
MGG_07753	gene-MGG_07753	0.454302	-1.13828	3.97e-51	4.76e-50	yes	down	799.713	406.97	853.96	767.49	777.69	385.2	415.6	420.11	60S ribosomal protein L11
MGG_01819	gene-MGG_01819	0.454364	-1.13808	1.7e-100	4.36e-99	yes	down	251.603	127.953	248.88	252.45	253.48	134.36	131.29	118.21	glycogen phosphorylase
MGG_14596	gene-MGG_14596	0.454746	-1.13687	1.74e-07	5.15e-07	yes	down	4.65	2.35333	4.58	4.51	4.86	1.76	2.67	2.63	hypothetical protein
MGG_10522	gene-MGG_10522	0.454823	-1.13662	1.48e-27	1.04e-26	yes	down	32.4567	16.5133	32.66	33.33	31.38	18.99	16.13	14.42	hypothetical protein
MGG_09760	gene-MGG_09760	0.455287	-1.13515	2.32e-58	3.19e-57	yes	down	107.167	54.67	109.19	106.88	105.43	56.66	53.41	53.94	hypothetical protein
MGG_03002	gene-MGG_03002	0.455406	-1.13478	2.3e-18	1.18e-17	yes	down	7.84333	4.19	7	8.11	8.42	3.78	5.17	3.62	hypothetical protein
MGG_04584	gene-MGG_04584	0.455414	-1.13475	2.16e-53	2.73e-52	yes	down	96.8433	49.4	92.54	100.3	97.69	47.58	53.67	46.95	HNRNP arginine N-methyltransferase
MGG_08694	gene-MGG_08694	0.455468	-1.13458	3.99e-15	1.79e-14	yes	down	14.9633	7.64333	15.25	14.3	15.34	7.66	7.83	7.44	hypothetical protein
MGG_09899	gene-MGG_09899	0.455596	-1.13417	1.53e-29	1.13e-28	yes	down	39.6333	20.2167	39.26	38.81	40.83	19.29	20.75	20.61	hypothetical protein
MGG_00917	gene-MGG_00917	0.455607	-1.13414	2.86e-34	2.39e-33	yes	down	81.0933	41.2767	81.73	81.03	80.52	42.06	37.56	44.21	carrier protein YMC1
MGG_01574	gene-MGG_01574	0.455707	-1.13382	5.51e-28	3.92e-27	yes	down	66.4167	25.5433	63.91	59.52	75.82	30.59	26.62	19.42	ADP-ribosylation factor
MGG_05238	gene-MGG_05238	0.455949	-1.13306	5.05e-41	4.9e-40	yes	down	673.983	343.017	652.2	677.8	691.95	305.86	342.85	380.34	40S ribosomal protein S14
MGG_14882	gene-MGG_14882	0.456087	-1.13262	2.53e-35	2.16e-34	yes	down	104.343	53.1567	102.65	103.59	106.79	48.05	54.37	57.05	epoxide hydrolase 1
MGG_05345	gene-MGG_05345	0.45652	-1.13125	5.29e-70	8.92e-69	yes	down	160.637	86.7167	151.4	168.08	162.43	89.08	81.91	89.16	dihydroxy-acid dehydratase
MGG_05601	gene-MGG_05601	0.456541	-1.13118	6.81e-18	3.43e-17	yes	down	21.4267	10.9567	20.52	22.37	21.39	11.99	10.38	10.5	hypothetical protein
MGG_12537	gene-MGG_12537	0.456692	-1.13071	1.03e-53	1.31e-52	yes	down	84.87	43.4567	82.19	86.14	86.28	45.73	43.77	40.87	phosphoribosylaminoimidazole-succinocarboxamide synthase
MGG_03439	gene-MGG_03439	0.456832	-1.13026	4.41e-10	1.54e-09	yes	down	22.8867	11.6333	24.04	25.19	19.43	12.71	8.27	13.92	acid phosphatase
MGG_01092	gene-MGG_01092	0.456847	-1.13022	2.87e-81	5.75e-80	yes	down	262.82	134.447	256.18	267.11	265.17	135.88	135.65	131.81	homocitrate synthase
MGG_16442	gene-MGG_16442	0.457065	-1.12953	4.47e-11	1.65e-10	yes	down	25.5	12.97	25.7	25.32	25.48	11.15	11.39	16.37	hypothetical protein
MGG_05815	gene-MGG_05815	0.457119	-1.12936	3.74e-09	1.23e-08	yes	down	10.5667	5.41333	9.86	10.62	11.22	5.36	5.9	4.98	pre-rRNA-processing protein ESF2
MGG_12316	gene-MGG_12316	0.45743	-1.12838	8.68e-53	1.08e-51	yes	down	2148.8	1104.23	2145.47	2100.18	2200.76	1165.51	1235.72	911.47	hypothetical protein
MGG_05999	gene-MGG_05999	0.457461	-1.12828	3.76e-22	2.22e-21	yes	down	80.6767	41.3267	83.02	84.45	74.56	36.67	45.94	41.37	H/ACA ribonucleoprotein complex subunit 2
MGG_13573	gene-MGG_13573	0.457786	-1.12725	1.73e-13	7.2e-13	yes	down	7.35667	3.45333	7.64	7.26	7.17	3.32	3.32	3.72	hypothetical protein
MGG_00363	gene-MGG_00363	0.457816	-1.12716	6.04e-16	2.81e-15	yes	down	6.83	3.52333	6.32	7.61	6.56	3.96	3.92	2.69	hypothetical protein
MGG_01004	gene-MGG_01004	0.458004	-1.12657	3.45e-81	6.89e-80	yes	down	268.317	137.877	276.74	265.18	263.03	140.79	142.05	130.79	hypothetical protein
MGG_02602	gene-MGG_02602	0.458386	-1.12537	2.65e-71	4.58e-70	yes	down	169.753	87.3333	171.59	168.96	168.71	92.48	88.57	80.95	hypothetical protein
MGG_03129	gene-MGG_03129	0.45866	-1.1245	3.92e-15	1.76e-14	yes	down	12.0533	6.21667	13.05	12.21	10.9	6.35	6.62	5.68	U3 small nucleolar RNA-associated protein 15
MGG_05322	gene-MGG_05322	0.459031	-1.12334	2.62e-15	1.18e-14	yes	down	11.2633	5.80333	9.69	12.77	11.33	6.18	6.31	4.92	zinc finger protein 467
MGG_08405	gene-MGG_08405	0.459093	-1.12314	1.09e-14	4.79e-14	yes	down	17.2133	8.84667	17.01	16.95	17.68	8.35	9.51	8.68	retinol dehydrogenase 13
MGG_13499	gene-MGG_13499	0.459618	-1.12149	5.03e-35	4.25e-34	yes	down	40.9633	21.04	37.51	43.48	41.9	19.89	22.44	20.79	acetyl-CoA acetyltransferase
MGG_13485	gene-MGG_13485	0.459642	-1.12142	1.91e-70	3.27e-69	yes	down	172.16	88.59	168	173.06	175.42	84.58	95.93	85.26	2-isopropylmalate synthase
MGG_17000	gene-MGG_17000	0.459889	-1.12064	1.17e-64	1.82e-63	yes	down	213.76	106.19	208.98	216.77	215.53	107.86	103.02	107.69	adenylosuccinate synthetase
MGG_17596	gene-MGG_17596	0.46017	-1.11976	6.74e-54	8.65e-53	yes	down	99.3133	51.1467	97.92	105.11	94.91	52.33	50.46	50.65	hypothetical protein
MGG_09284	gene-MGG_09284	0.460307	-1.11933	3.89e-10	1.37e-09	yes	down	21.26	10.8233	17.16	24.19	22.43	9.97	8.64	13.86	DNA-directed RNA polymerase I and III subunit RPAC1
MGG_07174	gene-MGG_07174	0.460674	-1.11818	2.08e-26	1.41e-25	yes	down	11.9967	6.21	11.43	13.11	11.45	6.99	6.3	5.34	elongator complex protein 1
MGG_09866	gene-MGG_09866	0.460802	-1.11778	2.25e-43	2.3e-42	yes	down	40.4733	20.9167	38.81	41.52	41.09	20.67	22.97	19.11	flagellar associated protein
MGG_08554	gene-MGG_08554	0.460913	-1.11743	7.97e-23	4.81e-22	yes	down	19.8333	10.22	20.13	19.14	20.23	9.74	10.13	10.79	amidohydrolase
MGG_10696	gene-MGG_10696	0.460958	-1.11729	3.21e-10	1.13e-09	yes	down	9.13667	4.69	8.98	8.82	9.61	4.24	4.46	5.37	hypothetical protein
MGG_10456	gene-MGG_10456	0.461446	-1.11577	8.29e-74	1.47e-72	yes	down	1956.11	1010.69	2032.07	1950.81	1885.44	973.7	1062.35	996.02	hypothetical protein
MGG_10852	gene-MGG_10852	0.461575	-1.11536	1.02e-61	1.5e-60	yes	down	90.92	47.04	87	92.36	93.4	47.39	49.6	44.13	methionine synthase
MGG_10665	gene-MGG_10665	0.461591	-1.11531	8.07e-24	5.05e-23	yes	down	73.47	37.9167	59.12	82.56	78.73	37.48	41.64	34.63	hypothetical protein
MGG_02523	gene-MGG_02523	0.461921	-1.11428	4.8e-10	1.67e-09	yes	down	7.35667	3.78667	6.17	7.87	8.03	3.4	4.12	3.84	hypothetical protein
MGG_14914	gene-MGG_14914	0.462046	-1.11389	1.26e-17	6.29e-17	yes	down	18.31	9.48	19.27	17.56	18.1	10.73	8.62	9.09	hypothetical protein
MGG_13230	gene-MGG_13230	0.462456	-1.11261	2.34e-29	1.72e-28	yes	down	38.27	19.8167	38.9	39.04	36.87	20.28	20.64	18.53	oxidoreductase
MGG_02747	gene-MGG_02747	0.462705	-1.11184	1.4e-69	2.35e-68	yes	down	1506.9	796.173	1546.09	1538.42	1436.19	748.4	804.49	835.63	40S ribosomal protein S4-A
MGG_10111	gene-MGG_10111	0.462983	-1.11097	0.00328261	0.00636617	yes	down	2.87333	1.48667	2.99	3.07	2.56	1.99	0.87	1.6	glucose and ribitol dehydrogenase
MGG_08569	gene-MGG_08569	0.46321	-1.11026	1.05e-34	8.8e-34	yes	down	64.27	33.3367	67.9	60.64	64.27	32.03	33.47	34.51	NADP:D-xylose dehydrogenase
MGG_08104	gene-MGG_08104	0.463413	-1.10963	1.1e-49	1.28e-48	yes	down	107.593	55.89	113.29	104.8	104.69	56.9	55.28	55.49	peptidyl-prolyl cis-trans isomerase
MGG_07928	gene-MGG_07928	0.463621	-1.10898	2.84e-86	6.14e-85	yes	down	3277.6	1703.1	3282.52	3266.54	3283.75	1631.7	1827.12	1650.47	ubiquitin-40S ribosomal protein S27a
MGG_02105	gene-MGG_02105	0.463993	-1.10782	9.58e-11	3.48e-10	yes	down	15.97	8.26	14.61	16.16	17.14	9.21	6.52	9.05	hypothetical protein
MGG_04696	gene-MGG_04696	0.46408	-1.10755	1.04e-77	1.95e-76	yes	down	1364.62	709.18	1370.85	1343.25	1379.76	696.76	719.73	711.05	60S ribosomal protein L10a
MGG_00202	gene-MGG_00202	0.464243	-1.10705	2.97e-08	9.24e-08	yes	down	8.07	4.21	9.21	8.37	6.63	4.82	3.8	4.01	hypothetical protein
MGG_04719	gene-MGG_04719	0.464286	-1.10691	5.1e-47	5.63e-46	yes	down	770.443	400.773	821.01	733.51	756.81	369.53	421.45	411.34	guanine nucleotide-binding protein subunit beta-like protein
MGG_01728	gene-MGG_01728	0.465467	-1.10325	1.16e-47	1.3e-46	yes	down	73.4033	38.27	70.7	73.75	75.76	40.51	37.09	37.21	methylenetetrahydrofolate reductase 1
MGG_05026	gene-MGG_05026	0.465691	-1.10255	1.9e-62	2.83e-61	yes	down	847.41	438.403	851.11	832.01	859.11	415.92	454.87	444.42	40S ribosomal protein S19
MGG_04901	gene-MGG_04901	0.466034	-1.10149	2.61e-46	2.83e-45	yes	down	170.243	88.7133	171.16	162.91	176.66	88.71	86.9	90.53	methyltransferase
MGG_03843	gene-MGG_03843	0.466203	-1.10097	1.45e-45	1.55e-44	yes	down	43.9567	22.9233	41.94	44.94	44.99	22.95	22.84	22.98	hypothetical protein
MGG_01309	gene-MGG_01309	0.466213	-1.10094	2.74e-61	3.99e-60	yes	down	78.8267	41.1667	74.35	80.27	81.86	44.45	40.98	38.07	histidine biosynthesis trifunctional protein
MGG_06693	gene-MGG_06693	0.466284	-1.10072	3.99e-84	8.33e-83	yes	down	794.33	415.233	802.17	783.16	797.66	423.73	423.19	398.78	60S ribosomal protein L27-A
MGG_14803	gene-MGG_14803	0.466337	-1.10056	8.51e-16	3.92e-15	yes	down	22.11	11.57	24.42	20.75	21.16	11.42	11.88	11.41	hypothetical protein
MGG_04372	gene-MGG_04372	0.466437	-1.10025	4.38e-29	3.19e-28	yes	down	26.9533	14.14	27.97	25.75	27.14	15.2	14.44	12.78	hypothetical protein
MGG_10453	gene-MGG_10453	0.467921	-1.09566	8.54e-05	0.000199782	yes	down	5.80667	2.99667	5.1	6.18	6.14	2.47	2.48	4.04	L-lactate dehydrogenase
MGG_10656	gene-MGG_10656	0.468044	-1.09528	1.84e-08	5.84e-08	yes	down	4.98	2.61333	4.06	5.11	5.77	3.16	2.29	2.39	dynamin family protein
MGG_10834	gene-MGG_10834	0.468161	-1.09492	8.23e-52	1e-50	yes	down	112.067	58.74	106.46	115.78	113.96	57.02	64.49	54.71	methylenetetrahydrofolate dehydrogenase
MGG_01657	gene-MGG_01657	0.468571	-1.09366	4.43e-70	7.5e-69	yes	down	85.1367	44.75	80.13	87.25	88.03	46.82	46.6	40.83	hypothetical protein
MGG_02247	gene-MGG_02247	0.46858	-1.09363	3.73e-12	1.46e-11	yes	down	14.24	7.49333	15.57	14.21	12.94	7.44	7.8	7.24	SAM-dependent methyltransferase
MGG_01114	gene-MGG_01114	0.468654	-1.0934	7.79e-94	1.88e-92	yes	down	1700.67	891.813	1624.84	1759.68	1717.49	891.32	897.02	887.1	NADP-dependent mannitol dehydrogenase
MGG_03645	gene-MGG_03645	0.468903	-1.09264	5.34e-33	4.32e-32	yes	down	37.6433	19.7733	38.25	37.15	37.53	18.34	21.68	19.3	adenylosuccinate lyase
MGG_00151	gene-MGG_00151	0.469046	-1.0922	1.5e-21	8.69e-21	yes	down	9.42333	4.96667	8.52	10.09	9.66	5.31	5.47	4.12	WD repeat-containing protein
MGG_03474	gene-MGG_03474	0.469765	-1.08999	1.59e-07	4.74e-07	yes	down	5.31	2.8	5.05	5.85	5.03	3.06	2.79	2.55	hypothetical protein
MGG_01609	gene-MGG_01609	0.469892	-1.0896	2.73e-76	5.01e-75	yes	down	6167.28	3245.57	6353.18	6157.67	5990.98	3195.38	3291.8	3249.53	hypothetical protein
MGG_09354	gene-MGG_09354	0.469964	-1.08938	0.00248068	0.0048877	yes	down	1.32667	0.686667	1.36	1.53	1.09	0.62	0.5	0.94	hypothetical protein
MGG_04902	gene-MGG_04902	0.469983	-1.08932	4.03e-07	1.16e-06	yes	down	7.66667	4.03667	7.63	7.82	7.55	3.9	4.2	4.01	hypothetical protein
MGG_05661	gene-MGG_05661	0.470144	-1.08882	4.36e-81	8.69e-80	yes	down	1905.05	1003.09	1908.06	1887.09	1920	979.73	1029.96	999.59	40S ribosomal protein S18
MGG_06227	gene-MGG_06227	0.470226	-1.08857	5.11e-10	1.78e-09	yes	down	23.3633	12.2733	24.77	24.9	20.42	12.75	10.82	13.25	hypothetical protein
MGG_04040	gene-MGG_04040	0.470336	-1.08824	6.14e-08	1.88e-07	yes	down	3.08	1.63	2.5	2.96	3.78	1.84	1.75	1.3	DEAH box polypeptide 37
MGG_08305	gene-MGG_08305	0.470784	-1.08686	3.95e-06	1.05e-05	yes	down	5.25	2.78	5.93	4.83	4.99	3.19	2.93	2.22	hypothetical protein
MGG_12420	gene-MGG_12420	0.47085	-1.08666	9.13e-44	9.44e-43	yes	down	1292.63	680.673	1241.9	1307.84	1328.16	648.92	666.87	726.23	hypothetical protein
MGG_05710	gene-MGG_05710	0.471072	-1.08598	7.14e-46	7.67e-45	yes	down	66.8833	33.0533	64.76	69.49	66.4	33.44	31.4	34.32	hypothetical protein
MGG_06197	gene-MGG_06197	0.471082	-1.08595	4.34e-58	5.95e-57	yes	down	111.297	58.6867	112.21	111.95	109.73	59.55	57.14	59.37	spermidine synthase
MGG_01747	gene-MGG_01747	0.471224	-1.08551	6.19e-13	2.53e-12	yes	down	7.72	4.06667	7.62	7.62	7.92	3.74	4.31	4.15	nitric oxide synthase
MGG_02694	gene-MGG_02694	0.471367	-1.08508	1.06e-11	4.05e-11	yes	down	6.99333	3.69333	7.14	7.62	6.22	4.05	3.66	3.37	hypothetical protein
MGG_00333	gene-MGG_00333	0.471554	-1.08451	6.2e-24	3.9e-23	yes	down	23.76	12.4833	25.9	21.52	23.86	13.1	12.15	12.2	hypothetical protein
MGG_06571	gene-MGG_06571	0.47156	-1.08449	4.86e-98	1.22e-96	yes	down	1932.89	1021.46	1900.93	1944.2	1953.53	1016.24	1071.55	976.6	60S ribosomal protein L43
MGG_00669	gene-MGG_00669	0.471587	-1.08441	4.02e-05	9.7e-05	yes	down	2.8	1.49333	3.26	2.82	2.32	1.66	1.64	1.18	hypothetical protein
MGG_16248	gene-MGG_16248	0.471651	-1.08421	1.98e-81	3.97e-80	yes	down	1055.99	557.42	1032.96	1066.35	1068.67	546.36	566.38	559.52	30S ribosomal protein S5
MGG_01248	gene-MGG_01248	0.471911	-1.08341	1.16e-47	1.29e-46	yes	down	71.19	37.7233	69.05	73.09	71.43	39.32	40.2	33.65	ran GTPase-activating protein 1
MGG_03998	gene-MGG_03998	0.472304	-1.08221	3.97e-10	1.39e-09	yes	down	12.1867	6.42333	12.53	12.73	11.3	5.86	6.56	6.85	phospholipase/Carboxylesterase superfamily protein
MGG_08201	gene-MGG_08201	0.472354	-1.08206	6.07e-51	7.24e-50	yes	down	1356.81	720.873	1320.23	1360.06	1390.15	747.86	660.9	753.86	hypothetical protein
MGG_03685	gene-MGG_03685	0.47291	-1.08036	9.23e-47	1.01e-45	yes	down	803.25	425.2	859.11	796.1	754.54	423.09	412.82	439.69	hypothetical protein
MGG_09525	gene-MGG_09525	0.472953	-1.08023	1.95e-12	7.75e-12	yes	down	7.37333	3.91	6.96	8.02	7.14	3.6	4.64	3.49	impact family protein
MGG_07708	gene-MGG_07708	0.473612	-1.07822	3.95e-49	4.55e-48	yes	down	89.1633	47.2633	91.22	88.16	88.11	47.09	46.27	48.43	flavoprotein oxygenase
MGG_12892	gene-MGG_12892	0.473824	-1.07758	1.48e-76	2.74e-75	yes	down	1038.36	552.01	1012.07	1036.77	1066.23	544.64	557.94	553.45	40S ribosomal protein S16
MGG_07702	gene-MGG_07702	0.473876	-1.07742	2.36e-14	1.02e-13	yes	down	23.1233	12.2633	23.22	22.98	23.17	11.07	13.32	12.4	fructose-1,6-bisphosphatase
MGG_09254	gene-MGG_09254	0.474083	-1.07679	1.24e-13	5.19e-13	yes	down	14.8867	7.9	14.05	14.72	15.89	7.07	8.96	7.67	20S-pre-rRNA D-site endonuclease NOB1
MGG_06695	gene-MGG_06695	0.474233	-1.07633	1.6e-47	1.78e-46	yes	down	81.42	43.1767	76.39	83.94	83.93	47.16	43.26	39.11	UDP-galactopyranose mutase
MGG_08566	gene-MGG_08566	0.474284	-1.07618	1.68e-05	4.2e-05	yes	down	7.36	3.87333	6.35	8.51	7.22	3.21	4.1	4.31	kinetochore protein spc-25
MGG_07298	gene-MGG_07298	0.474429	-1.07573	9.58e-48	1.07e-46	yes	down	60.35	32.7933	60.54	58.41	62.1	33.1	32.59	32.69	deoxycytidylate deaminase
MGG_08699	gene-MGG_08699	0.474558	-1.07534	6.88e-09	2.23e-08	yes	down	32.5	17.3433	36.83	30.73	29.94	18.11	17.27	16.65	hypothetical protein
MGG_04100	gene-MGG_04100	0.474936	-1.07419	3.48e-36	3.03e-35	yes	down	36.21	15.1033	30.83	41.55	36.25	11.99	16.41	16.91	STE/STE11/CDC15 protein kinase
MGG_07660	gene-MGG_07660	0.475098	-1.0737	3.45e-93	8.14e-92	yes	down	509.41	275.653	478.97	524.69	524.57	290.37	277.7	258.89	hypothetical protein
MGG_06425	gene-MGG_06425	0.475431	-1.07269	2.22e-34	1.86e-33	yes	down	26.3467	14.03	25.71	26.64	26.69	13.66	14.96	13.47	anthranilate synthase component 2
MGG_16895	gene-MGG_16895	0.475624	-1.07211	1.87e-65	2.95e-64	yes	down	216.46	115.59	202.83	223.83	222.72	121.86	123.43	101.48	eukaryotic translation initiation factor 3 subunit C
MGG_00613	gene-MGG_00613	0.475662	-1.07199	6.89e-20	3.77e-19	yes	down	30.1033	16.1233	29.82	29.64	30.85	18.94	15.93	13.5	hypothetical protein
MGG_04859	gene-MGG_04859	0.476427	-1.06967	6.58e-11	2.41e-10	yes	down	8.17667	4.34	7.58	9.18	7.77	4.66	3.96	4.4	hypothetical protein
MGG_04530	gene-MGG_04530	0.476589	-1.06918	2.61e-20	1.45e-19	yes	down	39.39	21.05	38.25	40.48	39.44	21.63	22.04	19.48	hypothetical protein
MGG_03965	gene-MGG_03965	0.47663	-1.06906	8.31e-43	8.37e-42	yes	down	499.17	266.547	509.36	494.12	494.03	249.89	279.01	270.74	60S ribosomal protein L26
MGG_02449	gene-MGG_02449	0.476797	-1.06855	9.1e-65	1.42e-63	yes	down	216.95	115.75	202.31	231.81	216.73	114.54	120.7	112.01	tyrosyl-tRNA synthetase
MGG_04574	gene-MGG_04574	0.476962	-1.06805	6.89e-60	9.8e-59	yes	down	356.67	190.553	365.74	354.56	349.71	188.41	193.47	189.78	3-beta-hydroxysteroid-Delta(8),Delta(7)-isomerase
MGG_09299	gene-MGG_09299	0.47726	-1.06715	3.56e-12	1.4e-11	yes	down	5.47667	2.94	4.75	5.75	5.93	3.35	3.15	2.32	peroxisome biosynthesis protein
MGG_02521	gene-MGG_02521	0.477445	-1.06659	8.66e-24	5.41e-23	yes	down	30.0367	16.05	31.21	29.94	28.96	15.13	16.62	16.4	carboxylesterase 3
MGG_11606	gene-MGG_11606	0.477481	-1.06648	2.19e-23	1.35e-22	yes	down	33.95	17.91	34.84	31.93	35.08	19.36	18.16	16.21	hypothetical protein
MGG_07937	gene-MGG_07937	0.477512	-1.06639	4.75e-25	3.07e-24	yes	down	60.54	30.8933	57.02	64.74	59.86	32.3	28.15	32.23	2-dehydropantoate 2-reductase
MGG_06911	gene-MGG_06911	0.477536	-1.06632	1.3e-47	1.45e-46	yes	down	112.097	59.89	108.17	113.53	114.59	61.77	58.18	59.72	rdgB/HAM1 family non-canonical purine NTP pyrophosphatase
MGG_08568	gene-MGG_08568	0.477643	-1.066	4.62e-17	2.25e-16	yes	down	18.3267	9.93667	18.3	18.01	18.67	8.97	11.73	9.11	aldo/keto reductase
MGG_05350	gene-MGG_05350	0.47806	-1.06474	1.24e-17	6.17e-17	yes	down	10.24	5.5	9.15	10.53	11.04	6.05	5.75	4.7	carboxy-terminal kinesin 2
MGG_10426	gene-MGG_10426	0.478155	-1.06445	1.93e-13	8.01e-13	yes	down	7.44333	4.02	6.69	7.82	7.82	4.79	4.38	2.89	hypothetical protein
MGG_02475	gene-MGG_02475	0.478447	-1.06357	1.25e-64	1.94e-63	yes	down	86.3733	46.3633	85.01	86.73	87.38	47.91	47.73	43.45	vitamin H transporter 1/biotin symporter vht1
MGG_05983	gene-MGG_05983	0.478452	-1.06355	2.74e-33	2.23e-32	yes	down	29.2833	14.6667	28.03	31.51	28.31	14.57	15.54	13.89	hypothetical protein
MGG_01308	gene-MGG_01308	0.478474	-1.06349	2.94e-16	1.39e-15	yes	down	8.24667	4.42333	7.75	9.24	7.75	4.38	4.94	3.95	GTPase binding protein Rid1
MGG_00981	gene-MGG_00981	0.478525	-1.06333	9.22e-14	3.89e-13	yes	down	8.21	4.41667	8.33	8.03	8.27	5.02	3.64	4.59	aspartic endopeptidase
MGG_08988	gene-MGG_08988	0.47863	-1.06302	0.000708841	0.00150289	yes	down	1.72333	0.923333	1.47	1.75	1.95	0.92	1.04	0.81	hypothetical protein
MGG_05132	gene-MGG_05132	0.478801	-1.0625	5.15e-06	1.36e-05	yes	down	5.64333	3.02	5.85	6.53	4.55	3.56	2.75	2.75	hypothetical protein
MGG_09550	gene-MGG_09550	0.478832	-1.06241	1.86e-32	1.47e-31	yes	down	110.597	59.2	110.98	110.07	110.74	52.24	63.06	62.3	homoserine kinase
MGG_08436	gene-MGG_08436	0.478957	-1.06203	1.84e-21	1.06e-20	yes	down	15.47	8.26667	13.33	17.55	15.53	8.28	8.21	8.31	minor extracellular protease vpr
MGG_06245	gene-MGG_06245	0.479157	-1.06143	3.24e-09	1.07e-08	yes	down	2.14667	1.16333	2.06	1.99	2.39	1.31	1.3	0.88	separin
MGG_05673	gene-MGG_05673	0.479201	-1.0613	6.07e-62	8.95e-61	yes	down	604.357	324.113	606.33	598.99	607.75	310.45	329.91	331.98	40S ribosomal protein S3
MGG_03671	gene-MGG_03671	0.479295	-1.06102	0.0151107	0.0266255	yes	down	2.49	1.34	2.75	2.23	2.49	1.65	1	1.37	hypothetical protein
MGG_12994	gene-MGG_12994	0.479316	-1.06095	7.88e-12	3.03e-11	yes	down	35.5667	19.04	36.47	36.58	33.65	19.86	16.94	20.32	hypothetical protein
MGG_00482	gene-MGG_00482	0.479419	-1.06064	1.46e-15	6.64e-15	yes	down	41.3433	22.22	43.89	42.37	37.77	21.68	22.78	22.2	60S ribosome subunit biogenesis protein NIP7
MGG_10306	gene-MGG_10306	0.479508	-1.06037	2.05e-24	1.3e-23	yes	down	1155.81	631.637	1276.11	1032.51	1158.81	558.39	604.86	731.66	hypothetical protein
MGG_08589	gene-MGG_08589	0.479732	-1.0597	1.82e-32	1.44e-31	yes	down	134.857	72.2533	126.28	144.07	134.22	82.48	63.57	70.71	hypothetical protein
MGG_02354	gene-MGG_02354	0.479912	-1.05916	4.41e-05	0.000106087	yes	down	3.14333	1.68333	2.94	3.15	3.34	1.67	1.54	1.84	hypothetical protein
MGG_10185	gene-MGG_10185	0.480012	-1.05886	2.26e-50	2.67e-49	yes	down	855.973	459.773	873.57	830.17	864.18	442.23	457.41	479.68	60S ribosomal protein L23a
MGG_12726	gene-MGG_12726	0.480047	-1.05875	2.1e-18	1.08e-17	yes	down	32.8633	17.6433	29.18	36.45	32.96	18.49	17.83	16.61	phenazine biosynthesis protein PhzF family protein
MGG_08802	gene-MGG_08802	0.480302	-1.05799	6.34e-33	5.13e-32	yes	down	64.3167	34.5633	64.58	68.37	60	32.88	36.31	34.5	GMP synthase
MGG_10680	gene-MGG_10680	0.480365	-1.0578	2.13e-83	4.37e-82	yes	down	1076.79	578.933	1036	1098.88	1095.5	568.2	594.4	574.2	40S ribosomal protein S24
MGG_07970	gene-MGG_07970	0.48047	-1.05748	5.5e-32	4.31e-31	yes	down	64.2133	34.5267	66.99	63.55	62.1	31.61	36.25	35.72	hypothetical protein
MGG_02660	gene-MGG_02660	0.481075	-1.05566	2.47e-79	4.76e-78	yes	down	799.723	437.02	774.32	817.75	807.1	436.78	439.22	435.06	nascent polypeptide-associated complex subunit alpha
MGG_09193	gene-MGG_09193	0.481091	-1.05562	4.52e-29	3.29e-28	yes	down	33.3133	17.5333	31.49	34.19	34.26	17.35	18.24	17.01	L-fucose-proton symporter
MGG_11078	gene-MGG_11078	0.48134	-1.05487	2.23e-12	8.84e-12	yes	down	8.30333	4.46	8.97	7.9	8.04	5.16	4.33	3.89	glutamyl-tRNA(Gln) amidotransferase subunit A
MGG_10824	gene-MGG_10824	0.481816	-1.05345	1.31e-43	1.34e-42	yes	down	324.28	175.473	355.18	310.57	307.09	172.25	188.04	166.13	hypothetical protein
MGG_06721	gene-MGG_06721	0.48188	-1.05326	2.8e-67	4.5e-66	yes	down	1511.86	816.03	1517.76	1493.43	1524.38	777.16	854.82	816.11	60S ribosomal protein L28
MGG_04455	gene-MGG_04455	0.482488	-1.05143	6.62e-77	1.23e-75	yes	down	1187.41	641.297	1155.1	1171.25	1235.88	633.08	671.41	619.4	60S ribosomal protein L35
MGG_09777	gene-MGG_09777	0.482558	-1.05123	7.18e-13	2.92e-12	yes	down	18.63	8.78	15.98	23.52	16.39	9.59	10.01	6.74	trichothecene 3-O-acetyltransferase
MGG_02659	gene-MGG_02659	0.483154	-1.04945	2.48e-85	5.3e-84	yes	down	1405.94	768.367	1386.83	1398.89	1432.11	766.91	785.96	752.23	60S ribosomal protein L14, variant
MGG_08464	gene-MGG_08464	0.483262	-1.04912	1.85e-23	1.14e-22	yes	down	45.6133	23.3933	44.04	44.83	47.97	24.13	21.76	24.29	aflatoxin B1 aldehyde reductase member 2
MGG_14922	gene-MGG_14922	0.484425	-1.04565	0.00411703	0.007868	yes	down	6.54	3.36	6.97	5.75	6.9	3.61	2.29	4.18	hypothetical protein
MGG_02952	gene-MGG_02952	0.485259	-1.04317	1.3e-30	9.9e-30	yes	down	693.21	373.99	710.48	689.7	679.45	321.25	383.29	417.43	40S ribosomal protein S9
MGG_09927	gene-MGG_09927	0.485367	-1.04285	1.57e-74	2.8e-73	yes	down	863.87	469.177	876.94	846.02	868.65	464.31	481.62	461.6	60S ribosomal protein L33-B
MGG_07266	gene-MGG_07266	0.485692	-1.04189	1.03e-25	6.82e-25	yes	down	47.31	25.6733	47.8	47.35	46.78	24.32	25.42	27.28	MYG1 protein
MGG_06601	gene-MGG_06601	0.485825	-1.04149	1.12e-18	5.83e-18	yes	down	931.907	515.903	1011.75	897.53	886.44	465.3	498.82	583.59	hypothetical protein
MGG_08455	gene-MGG_08455	0.486052	-1.04082	3.11e-20	1.72e-19	yes	down	32.27	17.5233	33.18	31.63	32	18.1	15.37	19.1	hypothetical protein
MGG_04962	gene-MGG_04962	0.486173	-1.04046	4.39e-18	2.23e-17	yes	down	20.84	11.31	19.55	22.52	20.45	10.11	12.18	11.64	hypothetical protein
MGG_16751	gene-MGG_16751	0.486221	-1.04032	3.58e-05	8.69e-05	yes	down	8.11	4.43333	7.92	6.73	9.68	3.51	5.33	4.46	hypothetical protein
MGG_04105	gene-MGG_04105	0.486262	-1.04019	1.57e-53	1.99e-52	yes	down	681.467	369.26	718.2	674.49	651.71	361.78	389.44	356.56	plasma membrane proteolipid 3
MGG_04067	gene-MGG_04067	0.486671	-1.03898	1.68e-61	2.46e-60	yes	down	112.74	61.4933	103.67	117.82	116.73	62.27	65.23	56.98	GTPase-activating protein GYP7
MGG_08897	gene-MGG_08897	0.486757	-1.03873	2.36e-51	2.85e-50	yes	down	121.28	66.24	115.32	123.08	125.44	65.01	73.8	59.91	asparaginyl-tRNA synthetase
MGG_04436	gene-MGG_04436	0.486853	-1.03844	7.47e-75	1.35e-73	yes	down	1038.3	564.263	974.26	1064.59	1076.06	548.53	596.31	547.95	elongation factor 1-beta
MGG_17889	gene-MGG_17889	0.486966	-1.03811	4.73e-18	2.4e-17	yes	down	36.95	20.12	34.04	38.35	38.46	19.87	20.45	20.04	hypothetical protein
MGG_04230	gene-MGG_04230	0.487068	-1.03781	7.38e-06	1.91e-05	yes	down	5.49667	2.98667	4.78	6.48	5.23	3.19	2.82	2.95	hypothetical protein
MGG_10565	gene-MGG_10565	0.487201	-1.03741	1.21e-63	1.84e-62	yes	down	225.463	122.977	218.34	226.17	231.88	122.34	124.81	121.78	zuotin
MGG_05962	gene-MGG_05962	0.487337	-1.03701	1.17e-22	7.04e-22	yes	down	62.8767	34.2867	59.19	61.23	68.21	34.77	34.03	34.06	hypothetical protein
MGG_08976	gene-MGG_08976	0.487364	-1.03693	4.23e-16	1.98e-15	yes	down	35.5067	18.92	32.76	38.03	35.73	17.38	20.11	19.27	nicotinamidase
MGG_01158	gene-MGG_01158	0.487552	-1.03637	0.000456799	0.000988242	yes	down	1.32	0.733333	1.93	1.24	0.79	0.84	0.81	0.55	DNA-directed RNA polymerase I subunit RPA1
MGG_10152	gene-MGG_10152	0.488071	-1.03484	2.33e-10	8.28e-10	yes	down	5.7	3.14333	4.92	6.07	6.11	3.57	3.07	2.79	hypothetical protein
MGG_03236	gene-MGG_03236	0.488071	-1.03484	2.4e-64	3.71e-63	yes	down	985.38	538.097	973.98	1001.12	981.04	512.75	552.67	548.87	40S ribosomal protein S6-B
MGG_04210	gene-MGG_04210	0.488165	-1.03456	3.33e-35	2.82e-34	yes	down	85.9367	46.86	77.91	90.29	89.61	48.09	44.69	47.8	arginine biosynthesis ArgJ
MGG_14816	gene-MGG_14816	0.488661	-1.03309	1.23e-06	3.39e-06	yes	down	4.19667	2.3	3.71	4.29	4.59	2.03	2.87	2	hypothetical protein
MGG_06041	gene-MGG_06041	0.488681	-1.03303	0.00639329	0.0119074	yes	down	0.896667	0.486667	0.91	0.62	1.16	0.31	0.57	0.58	rhamnogalacturonan lyase
MGG_08555	gene-MGG_08555	0.488871	-1.03248	1.62e-07	4.82e-07	yes	down	3.7	2.03	3.58	3.63	3.89	1.82	2.44	1.83	hypothetical protein
MGG_03238	gene-MGG_03238	0.48893	-1.0323	5.9e-46	6.35e-45	yes	down	62.8933	34.52	63.37	60.97	64.34	35.42	35.94	32.2	zinc finger protein ZPR1
MGG_03251	gene-MGG_03251	0.488946	-1.03225	1.69e-50	2e-49	yes	down	1418.35	776.42	1466.34	1380.6	1408.11	738.01	786.59	804.66	40S ribosomal protein S8
MGG_03193	gene-MGG_03193	0.489064	-1.0319	8.67e-87	1.89e-85	yes	down	744.137	372.523	743.6	730.03	758.78	363.93	385.72	367.92	60S ribosomal protein L3
MGG_00187	gene-MGG_00187	0.489355	-1.03105	4.38e-21	2.5e-20	yes	down	44.1667	24.2267	43.12	43.22	46.16	25.86	23.65	23.17	DL-glycerol-3-phosphatase 1
MGG_00448	gene-MGG_00448	0.490067	-1.02895	6.99e-10	2.4e-09	yes	down	6.71667	3.69	6.26	6.74	7.15	3.68	3.98	3.41	RanGTP-binding protein
MGG_07043	gene-MGG_07043	0.49014	-1.02874	3.93e-51	4.72e-50	yes	down	632.213	356.907	706.44	580.59	609.61	352.02	375.46	343.24	hypothetical protein
MGG_12095	gene-MGG_12095	0.490261	-1.02838	9.95e-57	1.34e-55	yes	down	267.937	147.017	255.87	266.22	281.72	147.79	146.8	146.46	NADPH-dependent methylglyoxal reductase GRE2
MGG_08008	gene-MGG_08008	0.490396	-1.02798	8.38e-44	8.68e-43	yes	down	200.46	109.987	203.35	198.18	199.85	106.11	110.28	113.57	formyltetrahydrofolate deformylase
MGG_00193	gene-MGG_00193	0.490705	-1.02707	2.05e-22	1.22e-21	yes	down	12.3533	7	12.44	12.4	12.22	7.8	7.59	5.61	mitotic control protein dis3
MGG_17696	gene-MGG_17696	0.49086	-1.02662	4.65e-20	2.56e-19	yes	down	16.7233	7.46333	18.17	15.9	16.1	8.07	8.02	6.3	hypothetical protein
MGG_09503	gene-MGG_09503	0.491173	-1.0257	9.02e-33	7.24e-32	yes	down	45.98	25.4867	44.16	48.67	45.11	24.68	27.33	24.45	hypothetical protein
MGG_03686	gene-MGG_03686	0.49143	-1.02494	2.62e-06	7.08e-06	yes	down	4.04333	2.23667	3.64	4.92	3.57	2.24	2.8	1.67	hypothetical protein
MGG_15421	gene-MGG_15421	0.491517	-1.02469	4.63e-05	0.000111284	yes	down	5.46667	3.03	4.85	5.44	6.11	3.27	3.05	2.77	monooxygenase
MGG_04779	gene-MGG_04779	0.491939	-1.02345	2.88e-09	9.55e-09	yes	down	32.2467	17.6567	34.65	31.93	30.16	16.48	14.92	21.57	hypothetical protein
MGG_13447	gene-MGG_13447	0.491996	-1.02328	1.84e-17	9.13e-17	yes	down	13.7567	7.55	12.14	14.81	14.32	7.56	8.5	6.59	atypical/RIO/RIO1 protein kinase
MGG_09750	gene-MGG_09750	0.492055	-1.02311	1.33e-21	7.75e-21	yes	down	63.1133	34.7733	69.59	57.6	62.15	33.92	33.15	37.25	diphosphomevalonate decarboxylase
MGG_01087	gene-MGG_01087	0.492102	-1.02297	5.26e-29	3.82e-28	yes	down	23.3567	12.9133	22.78	23.26	24.03	13	14.2	11.54	ribosome biogenesis protein TSR1
MGG_03881	gene-MGG_03881	0.49223	-1.0226	5.35e-14	2.28e-13	yes	down	7.34	4.02333	6.8	7.71	7.51	3.31	4.54	4.22	tRNA (uracil-5-)-methyltransferase
MGG_06321	gene-MGG_06321	0.4924	-1.0221	2.23e-49	2.58e-48	yes	down	120.863	65.58	108.97	126.61	127.01	70.06	67.31	59.37	glycyl-tRNA synthetase
MGG_06919	gene-MGG_06919	0.492428	-1.02202	3.31e-34	2.75e-33	yes	down	804.137	444.24	885.95	751.47	774.99	414.31	466.58	451.83	40S ribosomal protein S3aE
MGG_03271	gene-MGG_03271	0.493535	-1.01878	7.04e-10	2.42e-09	yes	down	9.44667	5.22	9.51	10.97	7.86	5.42	5.04	5.2	hypothetical protein
MGG_15697	gene-MGG_15697	0.494078	-1.01719	2.4e-12	9.51e-12	yes	down	8.63	4.77333	7.8	8.69	9.4	4.4	5.5	4.42	hypothetical protein
MGG_08880	gene-MGG_08880	0.494095	-1.01714	7.7e-45	8.15e-44	yes	down	101.733	56.1633	92.37	109.45	103.38	56.36	55.39	56.74	hypothetical protein
MGG_12818	gene-MGG_12818	0.494462	-1.01607	5.02e-54	6.47e-53	yes	down	113.273	68.1867	103.67	114.11	122.04	69.46	68.79	66.31	F-actin-capping protein subunit alpha
MGG_13049	gene-MGG_13049	0.494765	-1.01519	8.01e-15	3.54e-14	yes	down	31.2633	17.29	27.51	36.63	29.65	17.82	15.39	18.66	hypothetical protein
MGG_02392	gene-MGG_02392	0.494865	-1.01489	0.000580689	0.00124159	yes	down	861.767	506.553	1013.13	793.5	778.67	512.95	630.83	375.88	40S ribosomal protein S30
MGG_06609	gene-MGG_06609	0.494955	-1.01463	1.93e-68	3.18e-67	yes	down	376.417	208.543	371.13	384.26	373.86	205.35	212.21	208.07	acetyl-CoA hydrolase
MGG_02975	gene-MGG_02975	0.494998	-1.01451	6.76e-19	3.58e-18	yes	down	60.6133	33.62	63.26	60.52	58.06	34.49	32.99	33.38	hypothetical protein
MGG_06984	gene-MGG_06984	0.495019	-1.01445	4.71e-15	2.1e-14	yes	down	12.4133	6.91	10.28	13.09	13.87	7.61	7.72	5.4	DNA-directed RNA polymerase III subunit RPC2
MGG_04142	gene-MGG_04142	0.495034	-1.0144	9.44e-11	3.43e-10	yes	down	13.6467	7.59	13.54	14.3	13.1	9.21	6.48	7.08	hypothetical protein
MGG_01629	gene-MGG_01629	0.495469	-1.01313	4.63e-13	1.9e-12	yes	down	13.8267	7.68333	14.05	14.58	12.85	7.51	8.25	7.29	hypothetical protein
MGG_05864	gene-MGG_05864	0.495524	-1.01297	2.56e-13	1.06e-12	yes	down	8.33333	4.60667	7.71	8.8	8.49	4.45	4.55	4.82	exo-beta-D-glucosaminidase
MGG_09216	gene-MGG_09216	0.49558	-1.01281	2.52e-08	7.91e-08	yes	down	18.5333	10.2633	21.29	17.59	16.72	9.43	9.56	11.8	hypothetical protein
MGG_15022	gene-MGG_15022	0.495654	-1.0126	9.65e-33	7.72e-32	yes	down	6231.63	3450.27	6515.31	6162.15	6017.43	3301.57	3200.99	3848.25	hypothetical protein
MGG_05734	gene-MGG_05734	0.495992	-1.01161	5.19e-48	5.84e-47	yes	down	143.343	79.5933	139.35	140.81	149.87	77.34	81.75	79.69	phospho-2-dehydro-3-deoxyheptonate aldolase
MGG_08017	gene-MGG_08017	0.496049	-1.01144	4.9e-30	3.68e-29	yes	down	243.883	136.373	246.31	245.08	240.26	153.83	150.31	104.98	hypothetical protein
MGG_02713	gene-MGG_02713	0.496226	-1.01093	5.16e-57	6.99e-56	yes	down	742.84	415.253	723.29	729.39	775.84	401.01	432.3	412.45	nascent polypeptide-associated complex subunit beta
MGG_10605	gene-MGG_10605	0.496805	-1.00925	3.2e-39	3e-38	yes	down	66.52	36.9767	61.09	67.76	70.71	36.91	39.29	34.73	kelch repeats protein
MGG_02376	gene-MGG_02376	0.496852	-1.00911	6.08e-39	5.65e-38	yes	down	31.4533	17.5733	29.99	34.36	30.01	18.37	18.02	16.33	hormone-sensitive lipase
MGG_09875	gene-MGG_09875	0.496875	-1.00904	0.00874768	0.0160033	yes	down	2.75667	1.51667	3.39	3.32	1.56	1.28	1.24	2.03	CAS1 domain-containing protein 1
MGG_09766	gene-MGG_09766	0.497015	-1.00864	9.45e-58	1.29e-56	yes	down	223.603	123.75	204.08	234.53	232.2	124.53	126.73	119.99	3-deoxy-7-phosphoheptulonate synthase
MGG_00290	gene-MGG_00290	0.497118	-1.00834	2.08e-20	1.16e-19	yes	down	45.5267	25.3567	44.38	42.85	49.35	25.46	25.58	25.03	hypothetical protein
MGG_06322	gene-MGG_06322	0.49744	-1.00741	4.16e-19	2.22e-18	yes	down	25.63	14.3067	26.19	24.22	26.48	14.3	15.03	13.59	brix domain-containing protein
MGG_09732	gene-MGG_09732	0.497724	-1.00658	1.73e-15	7.84e-15	yes	down	12.7767	7.13	12.02	13.7	12.61	7.45	7.39	6.55	feruloyl esterase
MGG_04973	gene-MGG_04973	0.49783	-1.00628	8.08e-50	9.39e-49	yes	down	297.583	165.713	301.38	305.64	285.73	159.01	167.38	170.75	carbonate dehydratase
MGG_09273	gene-MGG_09273	0.498073	-1.00557	2.03e-06	5.52e-06	yes	down	2.62333	1.47	2.29	3.15	2.43	1.74	1.53	1.14	hypothetical protein
MGG_02803	gene-MGG_02803	0.498248	-1.00506	2.79e-40	2.67e-39	yes	down	458.413	255.997	466.87	463.96	444.41	268.53	264.03	235.43	hypothetical protein
MGG_06076	gene-MGG_06076	0.498292	-1.00494	1.78e-07	5.27e-07	yes	down	15.0633	8.38	15.76	15.07	14.36	8.18	7.69	9.27	kinetochore protein SPC24
MGG_17714	gene-MGG_17714	0.498332	-1.00482	9.5e-08	2.88e-07	yes	down	5.34	2.41333	5.19	5.85	4.98	2.46	2.8	1.98	hypothetical protein
MGG_01078	gene-MGG_01078	0.49851	-1.00431	5.61e-26	3.74e-25	yes	down	43.99	24.6	42.41	44.25	45.31	24.85	26.3	22.65	ribosome biogenesis protein BRX1
MGG_17695	gene-MGG_17695	0.499876	-1.00036	1.35e-36	1.19e-35	yes	down	92.05	51.6067	96.03	87.86	92.26	53.69	50.59	50.54	hypothetical protein
MGG_04842	gene-MGG_04842	0.49995	-1.00014	4.24e-44	4.43e-43	yes	down	53.3567	29.9333	53.85	51.81	54.41	30.36	31.12	28.32	homoaconitase
MGG_04637	gene-MGG_04637	0.500034	-0.999903	1.91e-18	9.86e-18	yes	down	11.57	6.48	11.65	11.29	11.77	6.39	6.62	6.43	tyrosine-protein phosphatase CDC14
MGG_03889	gene-MGG_03889	0.50014	-0.999596	3.98e-07	1.14e-06	yes	down	8.24	4.61667	8.48	9.24	7	4.4	5.7	3.75	threonine synthase
MGG_00677	gene-MGG_00677	0.500349	-0.998993	5.95e-10	2.06e-09	yes	down	14.8533	8.31	15.12	16.15	13.29	7.85	8.62	8.46	endoglucanase-1
MGG_16109	gene-MGG_16109	0.500508	-0.998535	0.00279069	0.00546809	yes	down	17.9233	8.64667	18.85	16.38	18.54	8.97	9.53	7.44	hypothetical protein
MGG_06658	gene-MGG_06658	0.500987	-0.997155	7.89e-61	1.14e-59	yes	down	999.76	560.617	994.32	1001.79	1003.17	537.17	576.86	567.82	40S ribosomal protein S5
MGG_09979	gene-MGG_09979	0.501318	-0.996201	1.37e-19	7.44e-19	yes	down	29.2533	16.4667	31.43	26.59	29.74	16.7	16.74	15.96	monooxygenase
MGG_02507	gene-MGG_02507	0.501514	-0.995639	1.31e-15	5.98e-15	yes	down	10.81	6.07667	10.46	11.05	10.92	6.73	5.66	5.84	inulinase
MGG_16333	gene-MGG_16333	0.501687	-0.995142	1.47e-14	6.39e-14	yes	down	30.0067	17.0267	31.02	28.68	30.32	19.77	19.4	11.91	hypothetical protein
MGG_06907	gene-MGG_06907	0.501881	-0.994583	8.32e-14	3.52e-13	yes	down	56.5033	31.5967	57	55.47	57.04	30.75	27.36	36.68	hypothetical protein
MGG_02125	gene-MGG_02125	0.501946	-0.994397	4.61e-43	4.67e-42	yes	down	91.3467	51.4	93.1	93.55	87.39	52.77	51.96	49.47	branched-chain-amino-acid aminotransferase 1
MGG_04742	gene-MGG_04742	0.502211	-0.993635	2.34e-08	7.37e-08	yes	down	13.28	7.48	13.2	12.33	14.31	7.43	7.86	7.15	hypothetical protein
MGG_16045	gene-MGG_16045	0.50294	-0.991541	2.33e-24	1.48e-23	yes	down	420.023	235.587	390.25	411.24	458.58	224.04	220.22	262.5	hypothetical protein
MGG_07885	gene-MGG_07885	0.502985	-0.991413	0.00533543	0.0100446	yes	down	1.23333	0.693333	1.04	1.35	1.31	0.65	0.83	0.6	nicotinamide mononucleotide permease
MGG_09190	gene-MGG_09190	0.503148	-0.990945	3.47e-52	4.25e-51	yes	down	89.94	50.9	82.96	93.07	93.79	54.31	53.06	45.33	aminopeptidase 2
MGG_15337	gene-MGG_15337	0.503262	-0.99062	1.71e-10	6.12e-10	yes	down	24.5833	12.47	25.07	20.79	27.89	11.79	11.9	13.72	zygote-specific protein
MGG_05307	gene-MGG_05307	0.503347	-0.990374	4.19e-73	7.36e-72	yes	down	744.497	418.88	713.92	760.24	759.33	407.07	438.01	411.56	hypothetical protein
MGG_04871	gene-MGG_04871	0.503476	-0.990005	1.8e-10	6.42e-10	yes	down	12.2167	6.90333	10.35	13.37	12.93	6.06	7.38	7.27	tRNA (adenine-N(1)-)-methyltransferase catalytic subunit trm61
MGG_01324	gene-MGG_01324	0.504591	-0.986813	7.31e-29	5.29e-28	yes	down	24.6867	13.9433	23.95	25.82	24.29	14.9	14.42	12.51	urease
MGG_12317	gene-MGG_12317	0.505106	-0.985343	5.71e-05	0.000135844	yes	down	7.17667	4.15	7.49	7.42	6.62	3.18	4.57	4.7	hypothetical protein
MGG_04872	gene-MGG_04872	0.505276	-0.984857	9.39e-41	9.03e-40	yes	down	48.72	27.6167	44.73	50.01	51.42	28.31	29.84	24.7	cysteinyl-tRNA synthetase
MGG_08690	gene-MGG_08690	0.505491	-0.984244	3.59e-58	4.94e-57	yes	down	158.727	89.8833	156.31	161.45	158.42	89.05	93.44	87.16	short-chain specific acyl-CoA dehydrogenase
MGG_01595	gene-MGG_01595	0.505793	-0.98338	3.72e-55	4.89e-54	yes	down	156.893	88.9833	147.98	163.42	159.28	88.41	96.89	81.65	eukaryotic translation initiation factor 3 subunit M
MGG_02368	gene-MGG_02368	0.506114	-0.982465	8.74e-59	1.22e-57	yes	down	100.74	57.21	99.12	101.95	101.15	59.81	59.01	52.81	galactose oxidase
MGG_08681	gene-MGG_08681	0.506225	-0.982148	8.14e-33	6.55e-32	yes	down	57.1867	32.4133	54.73	58.76	58.07	32.66	32.18	32.4	hypothetical protein
MGG_18134	gene-MGG_18134	0.506243	-0.982097	3.96e-27	2.74e-26	yes	down	34.3667	19.4867	34.06	33.86	35.18	20	19.17	19.29	hypothetical protein
MGG_17708	gene-MGG_17708	0.506557	-0.981204	0.00198373	0.00395629	yes	down	54.9033	31.3867	44.19	59.46	61.06	42.74	32.54	18.88	hypothetical protein
MGG_08904	gene-MGG_08904	0.50668	-0.980852	4.26e-40	4.05e-39	yes	down	48.4433	27.4833	45.25	51.63	48.45	27.93	28.45	26.07	hypothetical protein
MGG_16220	gene-MGG_16220	0.507143	-0.979536	1.02e-18	5.33e-18	yes	down	23.5133	13.41	22.7	22.51	25.33	13.94	14.87	11.42	hypothetical protein
MGG_04014	gene-MGG_04014	0.507162	-0.97948	5.52e-16	2.57e-15	yes	down	18.6033	10.46	16.23	20.07	19.51	10.41	9.82	11.15	dihydroxyacetone kinase
MGG_09204	gene-MGG_09204	0.507179	-0.979433	3.07e-27	2.13e-26	yes	down	54.8667	31.1467	50.7	58.21	55.69	29.6	33.89	29.95	hypothetical protein
MGG_03293	gene-MGG_03293	0.507403	-0.978797	1.66e-10	5.95e-10	yes	down	24.74	13.9533	21.2	25.59	27.43	13.65	13.06	15.15	hypothetical protein
MGG_05028	gene-MGG_05028	0.507442	-0.978686	0.00353475	0.00682648	yes	down	2.87	1.64333	2.54	2.22	3.85	1.72	2	1.21	hypothetical protein
MGG_06164	gene-MGG_06164	0.507633	-0.978142	5.85e-24	3.68e-23	yes	down	12.5033	7.10333	12.92	12.46	12.13	7.44	7.57	6.3	hypothetical protein
MGG_00341	gene-MGG_00341	0.507793	-0.977689	6.73e-56	8.99e-55	yes	down	209.823	119.293	197.06	214	218.41	122.08	127.92	107.88	eukaryotic translation initiation factor 3 subunit D
MGG_00097	gene-MGG_00097	0.507861	-0.977496	3e-24	1.89e-23	yes	down	57.0933	32.4967	62.45	53.26	55.57	31.01	32.91	33.57	hypothetical protein
MGG_02540	gene-MGG_02540	0.508063	-0.97692	2.27e-42	2.27e-41	yes	down	423.373	237.393	418.59	414.43	437.1	222.82	238.54	250.82	isovaleryl-CoA dehydrogenase 2
MGG_11259	gene-MGG_11259	0.508397	-0.975974	3.64e-55	4.79e-54	yes	down	348.41	202.177	339.07	358.42	347.74	214.56	217.99	173.98	hypothetical protein
MGG_10677	gene-MGG_10677	0.508571	-0.975479	3.25e-06	8.69e-06	yes	down	20.2567	11.51	26.19	15.4	19.18	8.78	11.19	14.56	mannose-6-phosphate isomerase
MGG_10957	gene-MGG_10957	0.508774	-0.974903	3.67e-53	4.59e-52	yes	down	244.173	139.323	249.9	239.2	243.42	136.51	147.61	133.85	hypothetical protein
MGG_02711	gene-MGG_02711	0.508878	-0.974607	2.79e-70	4.75e-69	yes	down	1001.99	571.013	996.54	1011.09	998.34	564.97	583.43	564.64	hypothetical protein
MGG_05141	gene-MGG_05141	0.50914	-0.973867	5.2e-06	1.37e-05	yes	down	15.8333	9.02333	14.85	18.19	14.46	10.72	8.21	8.14	hypothetical protein
MGG_10446	gene-MGG_10446	0.509441	-0.973013	2.08e-09	6.97e-09	yes	down	11.8333	6.69667	10.93	12.27	12.3	5.81	6.38	7.9	DNA-directed RNA polymerase III subunit RPC6
MGG_04334	gene-MGG_04334	0.509443	-0.973008	1.16e-30	8.85e-30	yes	down	89.09	49.4467	87.65	92.07	87.55	46.52	48.84	52.98	FAD binding domain-containing protein
MGG_04401	gene-MGG_04401	0.510194	-0.970883	3.3e-15	1.48e-14	yes	down	15.94	9.13	15.66	14.67	17.49	9.55	9.31	8.53	F-box and JmjC domain-containing protein
MGG_05048	gene-MGG_05048	0.510217	-0.970818	3.45e-26	2.31e-25	yes	down	25.22	14.4533	23.11	26.74	25.81	15.95	14.98	12.43	hypothetical protein
MGG_02254	gene-MGG_02254	0.510273	-0.970658	6.11e-52	7.45e-51	yes	down	251.347	143.58	250.29	251.27	252.48	142.27	144.35	144.12	hypothetical protein
MGG_03517	gene-MGG_03517	0.510403	-0.970291	1.77e-30	1.34e-29	yes	down	70.42	40.3667	64.41	73.86	72.99	38.35	46.9	35.85	hypothetical protein
MGG_09501	gene-MGG_09501	0.510404	-0.970288	6.86e-23	4.16e-22	yes	down	76.8233	43.79	68.4	77.54	84.53	41.04	45.37	44.96	serine racemase
MGG_05768	gene-MGG_05768	0.510442	-0.970181	6.95e-12	2.68e-11	yes	down	9.59667	5.48667	8.14	9.99	10.66	6	5.59	4.87	hypothetical protein
MGG_11518	gene-MGG_11518	0.510452	-0.970152	2.78e-11	1.04e-10	yes	down	23.0233	13.18	25.96	23.15	19.96	12.43	13.83	13.28	G/U mismatch-specific uracil DNA glycosylase
MGG_07518	gene-MGG_07518	0.51132	-0.967701	6.6e-47	7.27e-46	yes	down	60.0333	34.3733	57.97	59.42	62.71	34.3	35.02	33.8	centromere/microtubule-binding protein cbf5
MGG_03680	gene-MGG_03680	0.511391	-0.967503	3.17e-67	5.1e-66	yes	down	984.533	563.39	967.88	999.01	986.71	558.4	567.75	564.02	40S ribosomal protein S11
MGG_00634	gene-MGG_00634	0.51143	-0.967391	9.07e-35	7.65e-34	yes	down	52.3533	30.1367	52.09	52.61	52.36	33.94	31.29	25.18	nitrite reductase
MGG_05804	gene-MGG_05804	0.511942	-0.965949	7.72e-41	7.45e-40	yes	down	50.2833	28.83	47.68	54.57	48.6	28.85	30.44	27.2	phospholipase D p1
MGG_05531	gene-MGG_05531	0.512101	-0.9655	1.22e-10	4.4e-10	yes	down	16.51	2.94333	18.38	13.9	17.25	3.16	2.42	3.25	hypothetical protein
MGG_05683	gene-MGG_05683	0.512232	-0.965132	4.58e-27	3.16e-26	yes	down	71.42	41.1933	65.23	74.29	74.74	45.49	45.78	32.31	hypothetical protein
MGG_04484	gene-MGG_04484	0.512328	-0.964861	6.8e-39	6.31e-38	yes	down	826.673	470.74	834.44	814.2	831.38	431.48	483.36	497.38	60S ribosomal protein L18
MGG_16869	gene-MGG_16869	0.512332	-0.96485	8.04e-33	6.47e-32	yes	down	252.98	145.123	250.98	240.58	267.38	156.2	133.14	146.03	hypothetical protein
MGG_10445	gene-MGG_10445	0.51257	-0.964179	1.96e-05	4.89e-05	yes	down	8.37	5.48	12.94	6.49	5.68	4	8.62	3.82	thermostable alkaline protease
MGG_03223	gene-MGG_03223	0.512627	-0.964018	6.92e-11	2.53e-10	yes	down	5.58333	3.24	5.59	5.77	5.39	3.61	3.95	2.16	hypothetical protein
MGG_06769	gene-MGG_06769	0.512715	-0.963771	1e-51	1.22e-50	yes	down	222.09	127.9	224.2	229	213.07	131.87	138.22	113.61	hypothetical protein
MGG_05230	gene-MGG_05230	0.512732	-0.963723	3.35e-16	1.57e-15	yes	down	21.8267	12.5367	20.11	22.06	23.31	13.22	12.67	11.72	hypothetical protein
MGG_10496	gene-MGG_10496	0.513088	-0.962722	3.96e-17	1.94e-16	yes	down	40.79	23.43	39.68	39.85	42.84	24.3	23	22.99	diphthine synthase
MGG_04762	gene-MGG_04762	0.513709	-0.960977	0.0198596	0.0343379	yes	down	3.95667	2.25667	2.39	3.82	5.66	2.58	1.78	2.41	hypothetical protein
MGG_06920	gene-MGG_06920	0.513759	-0.960836	1.77e-71	3.07e-70	yes	down	193.477	111.213	193.77	192.1	194.56	113.94	114.84	104.86	rab protein
MGG_09894	gene-MGG_09894	0.513866	-0.960535	9.65e-57	1.3e-55	yes	down	1200.12	690.757	1187.74	1187.7	1224.91	686.55	710.29	675.43	40S ribosomal protein S28
MGG_06026	gene-MGG_06026	0.514149	-0.959742	8.68e-10	2.97e-09	yes	down	7.36333	4.25333	8.12	7.67	6.3	4.1	4.78	3.88	hypothetical protein
MGG_06356	gene-MGG_06356	0.514175	-0.959668	2.82e-33	2.3e-32	yes	down	61.3833	35.41	62.46	62.85	58.84	38.14	34.69	33.4	monothiol glutaredoxin-5
MGG_17610	gene-MGG_17610	0.514328	-0.95924	8.12e-10	2.78e-09	yes	down	27.57	15.2733	31.38	25.42	25.91	16.79	14.2	14.83	hypothetical protein
MGG_01592	gene-MGG_01592	0.51436	-0.95915	2.81e-61	4.09e-60	yes	down	259.753	149.743	248.66	259.02	271.58	151.48	155.3	142.45	eukaryotic translation initiation factor 2 subunit gamma
MGG_13106	gene-MGG_13106	0.514878	-0.957697	4.19e-09	1.38e-08	yes	down	16.9367	9.76667	18.22	18.11	14.48	9.08	10.45	9.77	hypothetical protein
MGG_06747	gene-MGG_06747	0.514935	-0.957538	2.66e-07	7.77e-07	yes	down	10.0267	5.72	10.2	9.88	10	5.43	5.72	6.01	glutathione S-transferase
MGG_03463	gene-MGG_03463	0.514957	-0.957476	4.96e-30	3.72e-29	yes	down	52.58	28.13	51.57	54.53	51.64	26.07	28.24	30.08	hypothetical protein
MGG_01270	gene-MGG_01270	0.515273	-0.956592	9.82e-22	5.73e-21	yes	down	58.11	32.8067	57.97	57.29	59.07	31.65	32.95	33.82	2,4-dihydroxyhept-2-ene-1,7-dioic acid aldolase
MGG_20155	gene-MGG_20155	0.515582	-0.955725	9.4e-21	5.28e-20	yes	down	742.16	427.15	733.31	749.16	744.01	414.33	382.94	484.18	tRNA-OTHER
MGG_00772	gene-MGG_00772	0.515629	-0.955595	1.78e-25	1.17e-24	yes	down	24.6867	13.2133	27.82	24.3	21.94	14.6	12.45	12.59	PX domain-containing protein
MGG_08841	gene-MGG_08841	0.515716	-0.955352	3.09e-12	1.22e-11	yes	down	7.24	4.21333	7.59	6.79	7.34	4.55	4.69	3.4	hypothetical protein
MGG_07890	gene-MGG_07890	0.516246	-0.95387	0.0111263	0.0200549	yes	down	1.73	0.996667	1.48	1.2	2.51	1.05	0.84	1.1	aldehyde dehydrogenase 3I1
MGG_15131	gene-MGG_15131	0.516254	-0.953848	1.29e-05	3.27e-05	yes	down	8.05	4.61333	6.58	9.48	8.09	4.52	4.21	5.11	peptidase M20 domain containing 2
MGG_08860	gene-MGG_08860	0.516334	-0.953624	2.69e-06	7.25e-06	yes	down	11.6967	6.75	10.32	12.19	12.58	5.26	8.92	6.07	exosome complex exonuclease RRP45
MGG_12632	gene-MGG_12632	0.516613	-0.952845	1.12e-47	1.25e-46	yes	down	191.973	111.157	197.36	190.48	188.08	115.32	109.18	108.97	hypothetical protein
MGG_12750	gene-MGG_12750	0.516759	-0.952437	1.48e-15	6.73e-15	yes	down	6.07667	3.51667	5.49	6.85	5.89	3.83	3.45	3.27	hypothetical protein
MGG_02819	gene-MGG_02819	0.517054	-0.951612	7.29e-23	4.41e-22	yes	down	26.5233	15.3633	26.4	27.85	25.32	14.73	17.04	14.32	hypothetical protein
MGG_08776	gene-MGG_08776	0.517341	-0.950813	1.07e-05	2.74e-05	yes	down	3.50667	2.03	3.24	3.16	4.12	1.87	2.21	2.01	major myo-inositol transporter iolT
MGG_01575	gene-MGG_01575	0.517521	-0.95031	8.43e-54	1.08e-52	yes	down	2005.89	1164.84	2083.39	1950.39	1983.88	1135.44	1206.72	1152.36	hypothetical protein
MGG_03378	gene-MGG_03378	0.517752	-0.949668	4.13e-14	1.77e-13	yes	down	11.5033	6.70333	9.86	12.61	12.04	7.56	7.57	4.98	nuclear condensin complex subunit Smc4
MGG_05266	gene-MGG_05266	0.518266	-0.948236	6.53e-51	7.78e-50	yes	down	187.01	108.657	171.05	191.26	198.72	112.44	113.4	100.13	eukaryotic translation initiation factor 3
MGG_04910	gene-MGG_04910	0.518514	-0.947545	5.71e-05	0.000135844	yes	down	41.8533	16.8433	34.87	53.08	37.61	14.04	18.06	18.43	hypothetical protein
MGG_05071	gene-MGG_05071	0.518525	-0.947515	1.27e-14	5.56e-14	yes	down	11.05	6.41667	9.81	12.3	11.04	6.67	6.59	5.99	hypothetical protein
MGG_17636	gene-MGG_17636	0.518543	-0.947465	8.86e-19	4.65e-18	yes	down	169.3	98.02	171.43	175.1	161.37	89.89	95.62	108.55	hypothetical protein
MGG_01175	gene-MGG_01175	0.518873	-0.946545	3.79e-10	1.33e-09	yes	down	6.45333	3.77	5.81	6.61	6.94	4.87	3.38	3.06	kinesin-II 85 kDa subunit
MGG_06185	gene-MGG_06185	0.519173	-0.945714	1.22e-38	1.13e-37	yes	down	2723.78	1578.13	2624.06	2767.16	2780.11	1588.38	1487.71	1658.3	hypothetical protein
MGG_08200	gene-MGG_08200	0.519266	-0.945455	1.31e-44	1.37e-43	yes	down	125.627	73.2833	119.46	128.16	129.26	80.31	75.73	63.81	hypothetical protein
MGG_03683	gene-MGG_03683	0.519462	-0.944909	1.32e-32	1.05e-31	yes	down	71.8967	41.6767	74.83	71.71	69.15	40.62	42.67	41.74	adenylate kinase, variant
MGG_04251	gene-MGG_04251	0.519551	-0.944662	5.4e-22	3.16e-21	yes	down	62.6433	36.4167	67.14	57.39	63.4	33.03	37.17	39.05	sodium/phosphate symporter
MGG_00343	gene-MGG_00343	0.519571	-0.944607	2.41e-39	2.26e-38	yes	down	398.637	224.527	374.96	407.11	413.84	211.92	216.91	244.75	hypothetical protein
MGG_11697	gene-MGG_11697	0.519588	-0.944559	5.01e-23	3.04e-22	yes	down	36.8833	21.48	37.8	35.52	37.33	21.28	21.95	21.21	carbamoylphosphate synthase large subunit
MGG_09302	gene-MGG_09302	0.519699	-0.944252	1.36e-12	5.46e-12	yes	down	31.47	18.3267	34.23	29.1	31.08	17.89	17.97	19.12	ribosome biogenesis protein
MGG_11084	gene-MGG_11084	0.519785	-0.944012	2.99e-23	1.83e-22	yes	down	27	15.7467	24.49	27.27	29.24	17.08	16.07	14.09	TPR domain-containing protein
MGG_06010	gene-MGG_06010	0.520222	-0.942801	2.11e-08	6.66e-08	yes	down	42.35	24.6567	41.24	41.12	44.69	26.3	23.42	24.25	hypothetical protein
MGG_01205	gene-MGG_01205	0.520326	-0.942514	1.9e-18	9.82e-18	yes	down	14.9867	8.73	14	15.51	15.45	8.9	9.02	8.27	tRNA-dihydrouridine synthase 3
MGG_07184	gene-MGG_07184	0.520898	-0.940926	3.54e-07	1.02e-06	yes	down	31.5333	19.4367	34.13	31.44	29.03	18.46	19.75	20.1	hypothetical protein
MGG_00457	gene-MGG_00457	0.521107	-0.940347	3.83e-12	1.5e-11	yes	down	15.16	8.88	14.91	15.68	14.89	9.38	9.49	7.77	hypothetical protein
MGG_15445	gene-MGG_15445	0.521368	-0.939625	9.33e-09	3e-08	yes	down	3.94333	2.31	3.76	4.59	3.48	2.46	2.56	1.91	hypothetical protein
MGG_07263	gene-MGG_07263	0.521501	-0.939258	2.77e-08	8.64e-08	yes	down	9.47	5.56333	10.11	8.75	9.55	6.07	5.92	4.7	dihydroorotate oxidase
MGG_03417	gene-MGG_03417	0.521765	-0.938529	0.000729152	0.00154441	yes	down	4.98333	2.91667	4.69	4.79	5.47	2.78	3.38	2.59	hypothetical protein
MGG_14748	gene-MGG_14748	0.521965	-0.937974	1.18e-10	4.27e-10	yes	down	15.5667	9.14	13.32	16.64	16.74	11.11	9.12	7.19	hypothetical protein
MGG_08019	gene-MGG_08019	0.522041	-0.937764	6.5e-71	1.12e-69	yes	down	3423.94	2131.37	3404.57	3412.83	3454.42	2123.22	2152.8	2118.1	F-box domain-containing protein
MGG_05449	gene-MGG_05449	0.523036	-0.935019	2.11e-51	2.55e-50	yes	down	902.35	529.04	926.33	899.4	881.32	505.05	565.13	516.94	60S ribosomal protein L16
MGG_04338	gene-MGG_04338	0.523206	-0.934548	4.61e-43	4.67e-42	yes	down	63.28	37.1133	63.16	65.87	60.81	36.95	38.98	35.41	potassium transporter 1
MGG_11063	gene-MGG_11063	0.523223	-0.934503	7.81e-19	4.11e-18	yes	down	22.8233	13.3633	20.75	24.03	23.69	13.28	13.7	13.11	nucleolar protein 12
MGG_09833	gene-MGG_09833	0.523416	-0.933971	6.6e-05	0.000155994	yes	down	6.65667	3.88333	7.26	5.25	7.46	3.54	3.32	4.79	hypothetical protein
MGG_09298	gene-MGG_09298	0.523621	-0.933405	1.33e-06	3.67e-06	yes	down	18.6733	10.8733	17.6	17.05	21.37	9.41	10.14	13.07	hypothetical protein
MGG_16655	gene-MGG_16655	0.523803	-0.932904	0.0109409	0.0197401	yes	down	7.69333	4.43667	6.38	8.17	8.53	4.68	5.05	3.58	hypothetical protein
MGG_11682	gene-MGG_11682	0.523858	-0.932753	3.85e-07	1.11e-06	yes	down	6.72333	3.93333	6.21	8.03	5.93	3.36	4.63	3.81	phenylacetone monooxygenase
MGG_13035	gene-MGG_13035	0.523858	-0.932752	4.78e-19	2.54e-18	yes	down	93.1433	54.63	98.41	85.34	95.68	50.27	56.28	57.34	hypothetical protein
MGG_01100	gene-MGG_01100	0.524251	-0.931671	2.42e-11	9.05e-11	yes	down	15.27	9.01333	15.18	14.52	16.11	8.59	10.92	7.53	small nucleolar ribonucleoprotein complex subunit
MGG_16392	gene-MGG_16392	0.524292	-0.931558	5.01e-42	4.97e-41	yes	down	264.423	155.013	264.4	267.21	261.66	153.18	149.73	162.13	hypothetical protein
MGG_10116	gene-MGG_10116	0.52445	-0.931122	6.32e-07	1.78e-06	yes	down	5.17	3.04333	5.04	4.99	5.48	3.36	3.01	2.76	hypothetical protein
MGG_10846	gene-MGG_10846	0.524499	-0.930988	6.93e-05	0.000163549	yes	down	8.55333	4.20667	7.61	9.91	8.14	4.64	3.55	4.43	hypothetical protein
MGG_10497	gene-MGG_10497	0.524852	-0.930018	8.92e-09	2.87e-08	yes	down	23.9233	14.0433	26.04	22.03	23.7	14.91	11.79	15.43	bli-3
MGG_18017	gene-MGG_18017	0.525061	-0.929442	1.38e-48	1.57e-47	yes	down	133.427	78.4633	133.64	134.51	132.13	76.98	81.02	77.39	hypothetical protein
MGG_06590	gene-MGG_06590	0.525292	-0.928808	0.00340476	0.00658742	yes	down	1.24	0.73	0.89	1.68	1.15	0.85	0.84	0.5	acetyl-CoA carboxylase
MGG_05980	gene-MGG_05980	0.525633	-0.927872	2.98e-46	3.22e-45	yes	down	696.007	420.853	689.96	691.62	706.44	412.7	418.18	431.68	pyridoxine biosynthesis protein PDX1
MGG_01102	gene-MGG_01102	0.525993	-0.926883	5e-34	4.15e-33	yes	down	127.65	74.9967	120.49	131.43	131.03	74.38	71.91	78.7	ornithine carbamoyltransferase
MGG_08577	gene-MGG_08577	0.526197	-0.926325	4.85e-20	2.67e-19	yes	down	120.173	71.3467	119.85	118.9	121.77	80.58	80.62	52.84	hypothetical protein
MGG_06392	gene-MGG_06392	0.526281	-0.926096	8.95e-42	8.83e-41	yes	down	118.753	70.0633	122.93	119.86	113.47	73.24	70.1	66.85	ornithine aminotransferase
MGG_08821	gene-MGG_08821	0.526328	-0.925966	5.02e-07	1.43e-06	yes	down	4.58	2.71	4.59	4.42	4.73	3.27	2.3	2.56	hypothetical protein
MGG_10160	gene-MGG_10160	0.526419	-0.925717	1.73e-26	1.17e-25	yes	down	54.72	32.26	50.87	54.81	58.48	33.37	32.5	30.91	ribosome biogenesis protein RLP24
MGG_04556	gene-MGG_04556	0.52682	-0.924617	1.35e-21	7.86e-21	yes	down	50.7933	29.88	46.21	54.5	51.67	31.39	27.63	30.62	alcohol dehydrogenase 1
MGG_06148	gene-MGG_06148	0.526922	-0.924338	8.13e-32	6.36e-31	yes	down	32.2167	19.1133	32.09	33.56	31	20.25	19.7	17.39	peroxisomal hydratase-dehydrogenase-epimerase
MGG_00223	gene-MGG_00223	0.527242	-0.923464	1.29e-53	1.64e-52	yes	down	660.197	408.357	654.79	668.29	657.51	402.08	405.69	417.3	fructose-bisphosphate aldolase 1
MGG_12652	gene-MGG_12652	0.527443	-0.922914	1.44e-19	7.82e-19	yes	down	15.24	9.01333	15.38	15.43	14.91	8.94	9.46	8.64	extracellular cell wall glucanase Crf1
MGG_09715	gene-MGG_09715	0.527911	-0.921633	1.15e-27	8.1e-27	yes	down	88.0833	52.0233	88.87	88.09	87.29	47.57	55.23	53.27	aldo-keto reductase yakc
MGG_11561	gene-MGG_11561	0.527922	-0.921604	6.56e-08	2.01e-07	yes	down	69.6333	41.32	66.03	72.19	70.68	48.78	45.58	29.6	hypothetical protein
MGG_05769	gene-MGG_05769	0.528049	-0.921256	3.49e-06	9.31e-06	yes	down	5.81	3.45333	6.45	4.72	6.26	3.68	3.37	3.31	hypothetical protein
MGG_17278	gene-MGG_17278	0.528228	-0.920767	2.07e-41	2.02e-40	yes	down	215.057	127.287	193.79	222.37	229.01	136.59	127.1	118.17	argininosuccinate lyase
MGG_08834	gene-MGG_08834	0.528509	-0.920001	3.44e-49	3.97e-48	yes	down	915.22	541.283	922.16	910.94	912.56	521.13	558.74	543.98	ribosomal protein L28e
MGG_02638	gene-MGG_02638	0.528946	-0.918809	5.57e-36	4.82e-35	yes	down	207.08	122.913	205.3	208.14	207.8	123.82	116.18	128.74	hypothetical protein
MGG_02695	gene-MGG_02695	0.529056	-0.918507	1.94e-49	2.25e-48	yes	down	139.08	82.38	136.26	140.05	140.93	82.99	82.35	81.8	cysteine proteinase 1
MGG_12582	gene-MGG_12582	0.529137	-0.918288	0.00400545	0.00767133	yes	down	9.28333	4.77333	8.04	9.15	10.66	3.46	6.06	4.8	hypothetical protein
MGG_14087	gene-MGG_14087	0.529209	-0.91809	0.0246447	0.0419893	yes	down	0.75	0.436667	0.57	0.98	0.7	0.37	0.44	0.5	beta 1,3 exoglucanase
MGG_06426	gene-MGG_06426	0.529235	-0.918019	2.87e-13	1.19e-12	yes	down	8.10333	4.83	7.24	8.66	8.41	5.36	5.52	3.61	hypothetical protein
MGG_07449	gene-MGG_07449	0.52936	-0.91768	1.97e-09	6.63e-09	yes	down	14.0033	8.29333	13.6	13.7	14.71	9	7.37	8.51	hypothetical protein
MGG_10970	gene-MGG_10970	0.529398	-0.917576	9.03e-42	8.91e-41	yes	down	74.4133	44.2467	75.04	74.89	73.31	45.78	47.1	39.86	hypothetical protein
MGG_05248	gene-MGG_05248	0.529647	-0.916897	1.53e-40	1.47e-39	yes	down	846.263	501.917	883.88	828.24	826.67	480.14	511.68	513.93	60S ribosomal protein L32
MGG_06837	gene-MGG_06837	0.529774	-0.916551	1.46e-40	1.4e-39	yes	down	865.117	541.543	874.9	787.43	933.02	468.9	503.2	652.53	40S ribosomal protein S21
MGG_05014	gene-MGG_05014	0.530312	-0.915088	1.27e-22	7.62e-22	yes	down	26.6233	15.7833	27.13	26.42	26.32	15.25	16.88	15.22	hypothetical protein
MGG_03556	gene-MGG_03556	0.530693	-0.91405	1.87e-28	1.34e-27	yes	down	121.133	72.05	122.24	120.8	120.36	77.71	68.98	69.46	H/ACA ribonucleoprotein complex subunit 1
MGG_00329	gene-MGG_00329	0.530968	-0.913302	4.41e-70	7.47e-69	yes	down	340.147	203.24	349.32	336.63	334.49	211.98	205.41	192.33	hypothetical protein
MGG_01113	gene-MGG_01113	0.53101	-0.91319	5.44e-42	5.4e-41	yes	down	1269.61	754.353	1275.07	1234.77	1298.98	733.15	747.49	782.42	40S ribosomal protein S10-A
MGG_12162	gene-MGG_12162	0.531016	-0.913174	7.62e-14	3.23e-13	yes	down	20.7433	12.19	20.76	22.58	18.89	12.13	12.53	11.91	riboflavin biosynthesis protein Rib7
MGG_03653	gene-MGG_03653	0.531417	-0.912083	2.63e-48	2.99e-47	yes	down	1153.33	685.63	1145.69	1148.88	1165.41	654.55	701.04	701.3	60S ribosomal protein L20
MGG_11400	gene-MGG_11400	0.531685	-0.911355	4.59e-21	2.62e-20	yes	down	33.9167	20.1267	31.67	34.2	35.88	18.82	20.65	20.91	endo-1,4-beta-xylanase D
MGG_00744	gene-MGG_00744	0.531809	-0.911019	4.44e-14	1.9e-13	yes	down	9.82667	5.88667	9.09	9.79	10.6	6.44	6.52	4.7	hypothetical protein
MGG_15986	gene-MGG_15986	0.531937	-0.910674	8.96e-23	5.4e-22	yes	down	98.1967	57.92	94.36	100.14	100.09	52.58	60.79	60.39	hypothetical protein
MGG_08453	gene-MGG_08453	0.532305	-0.909675	7.23e-11	2.64e-10	yes	down	13.65	8.19	13.75	13.2	14	9.26	8.56	6.75	hypothetical protein
MGG_06488	gene-MGG_06488	0.532803	-0.908326	6.03e-17	2.92e-16	yes	down	25.8967	15.4533	23.3	26.66	27.73	16.12	15.8	14.44	2-amino-3-carboxymuconate-6-semialdehyde decarboxylase
MGG_11371	gene-MGG_11371	0.533661	-0.906006	3.72e-25	2.41e-24	yes	down	33.42	20.5133	33.87	33.4	32.99	19.17	21.03	21.34	hypothetical protein
MGG_03029	gene-MGG_03029	0.534576	-0.903534	9.04e-10	3.09e-09	yes	down	27.8233	16.4833	28.74	26.85	27.88	13.51	15.98	19.96	metalloproteinase
MGG_04967	gene-MGG_04967	0.534662	-0.903301	1.26e-05	3.21e-05	yes	down	2.55667	1.52	2.32	3.11	2.24	1.4	1.5	1.66	zinc-regulated transporter 2
MGG_12760	gene-MGG_12760	0.534837	-0.902829	4.88e-31	3.76e-30	yes	down	60.1867	35.6067	57.48	62.28	60.8	35.76	34.61	36.45	anthranilate synthase component I, variant
MGG_01683	gene-MGG_01683	0.53509	-0.902145	2.88e-24	1.82e-23	yes	down	78.67	47.1433	82.27	74.67	79.07	46.34	46.67	48.42	ubiquitin carboxyl-terminal hydrolase
MGG_09156	gene-MGG_09156	0.535104	-0.902109	1.27e-10	4.6e-10	yes	down	16.05	9.59667	14.22	17.52	16.41	10.97	8.26	9.56	ent-kaurene oxidase
MGG_01479	gene-MGG_01479	0.53528	-0.901635	0.000114602	0.000264474	yes	down	10.7433	6.44333	10.62	11.87	9.74	8.18	5.08	6.07	hypothetical protein
MGG_06248	gene-MGG_06248	0.535288	-0.901613	3.31e-10	1.17e-09	yes	down	13.7733	8.23	13.97	15.27	12.08	8.58	7.29	8.82	hypothetical protein
MGG_05721	gene-MGG_05721	0.535617	-0.900726	1.02e-11	3.89e-11	yes	down	15.2433	9.11667	13.49	16.12	16.12	9.72	8.49	9.14	hypothetical protein
MGG_06600	gene-MGG_06600	0.535656	-0.90062	7.3e-34	6.01e-33	yes	down	69.1167	46.0733	66.41	71.49	69.45	50.91	42.69	44.62	carbonate dehydratase
MGG_08649	gene-MGG_08649	0.535667	-0.900592	7.16e-48	8.04e-47	yes	down	304	182.39	298.91	302.66	310.43	176.4	191.17	179.6	farnesyl pyrophosphate synthase
MGG_07080	gene-MGG_07080	0.535825	-0.900166	4.4e-15	1.97e-14	yes	down	29.1867	17.5567	27.21	28.81	31.54	17.73	18.9	16.04	UDP-glucose 4-epimerase Gal10
MGG_11553	gene-MGG_11553	0.535845	-0.900113	1.38e-40	1.33e-39	yes	down	70.28	42.2567	68.58	71.99	70.27	45.91	41.59	39.27	xyloglucanase
MGG_04495	gene-MGG_04495	0.535907	-0.899947	5.26e-53	6.56e-52	yes	down	153.087	92.0833	150.72	155.47	153.07	97.28	95.07	83.9	phosphoglucomutase
MGG_00299	gene-MGG_00299	0.536088	-0.899458	1.32e-07	3.94e-07	yes	down	6.63667	3.99	6.06	6.43	7.42	3.58	4.92	3.47	hypothetical protein
MGG_09642	gene-MGG_09642	0.536246	-0.899034	4.19e-27	2.9e-26	yes	down	99.2767	56.5933	86	103.54	108.29	61.32	41.42	67.04	alpha-amylase
MGG_03269	gene-MGG_03269	0.536253	-0.899013	3.45e-17	1.69e-16	yes	down	14.3667	8.69333	14.73	13.77	14.6	9.28	9.91	6.89	hypothetical protein
MGG_10575	gene-MGG_10575	0.536274	-0.898958	1.45e-46	1.58e-45	yes	down	2347.87	1410.65	2405.63	2245.51	2392.48	1399.54	1415.53	1416.87	hypothetical protein
MGG_04041	gene-MGG_04041	0.536326	-0.898817	6.94e-11	2.54e-10	yes	down	39.2967	23.4567	39.18	42.04	36.67	23.23	27.17	19.97	hypothetical protein
MGG_05503	gene-MGG_05503	0.536358	-0.898733	3.4e-11	1.26e-10	yes	down	24.8433	14.9	22.67	27.95	23.91	13.03	17.65	14.02	high-affinity nickel-transporter nixA
MGG_09031	gene-MGG_09031	0.536667	-0.897902	1.5e-20	8.38e-20	yes	down	234.43	140.49	240.17	228.28	234.84	135.28	130.6	155.59	hypothetical protein
MGG_01227	gene-MGG_01227	0.536672	-0.897887	2.13e-22	1.27e-21	yes	down	16.61	10.0033	15	17.76	17.07	10.96	10.75	8.3	hypothetical protein
MGG_08594	gene-MGG_08594	0.536867	-0.897363	6.26e-11	2.3e-10	yes	down	6.38333	3.85333	5.7	7.05	6.4	3.8	4.56	3.2	hypothetical protein
MGG_08630	gene-MGG_08630	0.537028	-0.89693	2.32e-06	6.29e-06	yes	down	4.21	2.53	3.13	3.94	5.56	2.82	2.42	2.35	hypothetical protein
MGG_05437	gene-MGG_05437	0.537145	-0.896616	6.13e-18	3.1e-17	yes	down	216.803	131.103	222.86	202.44	225.11	150.05	136.55	106.71	hypothetical protein
MGG_03473	gene-MGG_03473	0.537245	-0.896349	1.01e-09	3.44e-09	yes	down	16.4133	9.9	16.32	15.84	17.08	7.85	10.91	10.94	isoflavone reductase
MGG_02690	gene-MGG_02690	0.537398	-0.895936	3.27e-53	4.1e-52	yes	down	82.93	49.98	81.09	83.29	84.41	51.38	51.54	47.02	Arg-6 protein
MGG_04744	gene-MGG_04744	0.537583	-0.895442	6.83e-11	2.5e-10	yes	down	13.58	8.11667	13.9	12.55	14.29	7.49	9.55	7.31	cysteine desulfurase
MGG_10370	gene-MGG_10370	0.537691	-0.895149	4.53e-56	6.07e-55	yes	down	2045.77	1231.17	2003.75	2049.12	2084.45	1206.6	1253.04	1233.86	40S ribosomal protein S15
MGG_01582	gene-MGG_01582	0.537879	-0.894646	8.01e-43	8.07e-42	yes	down	95.3133	56.42	95.12	96.43	94.39	59.5	56.13	53.63	T-complex protein 1 subunit delta
MGG_05168	gene-MGG_05168	0.538303	-0.893508	3.44e-16	1.61e-15	yes	down	31.7867	19.2133	34.83	28.97	31.56	19.51	18.92	19.21	anthranilate phosphoribosyltransferase
MGG_05301	gene-MGG_05301	0.538377	-0.893311	6.11e-06	1.6e-05	yes	down	14.5467	8.71	13.74	15.8	14.1	8.84	7.39	9.9	hypothetical protein
MGG_03537	gene-MGG_03537	0.538377	-0.89331	3.32e-35	2.82e-34	yes	down	100.68	61.0833	93.03	103.98	105.03	66.92	64.46	51.87	importin subunit beta-3
MGG_11638	gene-MGG_11638	0.538604	-0.892703	0.00922282	0.0168117	yes	down	0.483333	0.293333	0.36	0.59	0.5	0.41	0.29	0.18	lovastatin nonaketide synthase
MGG_09806	gene-MGG_09806	0.539083	-0.891422	1.55e-25	1.02e-24	yes	down	53.85	32.5567	55.06	57.18	49.31	33.62	33.35	30.7	hypothetical protein
MGG_15485	gene-MGG_15485	0.539714	-0.889733	0.00158351	0.00320323	yes	down	6.86333	4.18333	5.58	6.86	8.15	3.88	4.29	4.38	TKL protein kinase
MGG_07212	gene-MGG_07212	0.539844	-0.889386	6.03e-43	6.1e-42	yes	down	2182.96	1318.98	2217.29	2149.55	2182.03	1261.23	1335.65	1360.06	hypothetical protein
MGG_05314	gene-MGG_05314	0.539973	-0.889041	2.01e-10	7.17e-10	yes	down	12.1933	7.37	11.58	11.61	13.39	7.63	7.02	7.46	hypothetical protein
MGG_04942	gene-MGG_04942	0.540023	-0.888908	5.55e-27	3.81e-26	yes	down	47.27	28.5667	46.11	47.08	48.62	29.71	27.72	28.27	phosphotyrosine protein phosphatase
MGG_07929	gene-MGG_07929	0.540042	-0.888855	1.51e-41	1.48e-40	yes	down	3848.74	2212.74	3954.34	3771.52	3820.35	2088.85	2339.32	2210.06	40S ribosomal protein S26E
MGG_07616	gene-MGG_07616	0.540348	-0.888041	1.56e-19	8.46e-19	yes	down	15.87	9.58667	15.89	16.5	15.22	9.57	9.25	9.94	succinate/fumarate mitochondrial transporter
MGG_05277	gene-MGG_05277	0.540364	-0.887995	3.81e-05	9.23e-05	yes	down	4.06667	2.46333	3.48	4.79	3.93	2.63	2.79	1.97	alpha-tubulin suppressor protein Aats1
MGG_00476	gene-MGG_00476	0.540625	-0.8873	2.9e-29	2.12e-28	yes	down	58.2633	35.3567	54.22	57.34	63.23	38.04	36.33	31.7	xaa-Pro aminopeptidase 1
MGG_00479	gene-MGG_00479	0.541104	-0.886021	6.41e-11	2.35e-10	yes	down	13.5333	8.23	13.24	13.89	13.47	9.14	8.15	7.4	AUR protein kinase
MGG_02625	gene-MGG_02625	0.541218	-0.885718	2.67e-26	1.8e-25	yes	down	703.96	425.31	676.97	709.33	725.58	434.89	402.03	439.01	superoxide dismutase
MGG_01066	gene-MGG_01066	0.541517	-0.884922	5.37e-39	5e-38	yes	down	1361.62	825.517	1378.71	1341.08	1365.07	764.71	863.84	848	40S ribosomal protein S23
MGG_03044	gene-MGG_03044	0.541753	-0.884294	1.88e-08	5.95e-08	yes	down	13.1867	8.01	13.68	11.72	14.16	7.2	8.87	7.96	hypothetical protein
MGG_01123	gene-MGG_01123	0.542112	-0.883338	1.58e-21	9.14e-21	yes	down	16.7167	10.1533	15.13	17.2	17.82	10.92	9.96	9.58	pre-rRNA processing protein Rrp12
MGG_13796	gene-MGG_13796	0.542404	-0.88256	2e-05	4.96e-05	yes	down	14.8133	8.99333	15.15	13.94	15.35	9.16	8.47	9.35	stress responsive A/B barrel domain-containing protein
MGG_05481	gene-MGG_05481	0.54259	-0.882067	3.77e-12	1.48e-11	yes	down	13.93	8.47667	12.79	14.92	14.08	8.25	9.63	7.55	elongator complex protein 3
MGG_07791	gene-MGG_07791	0.542592	-0.882059	3.91e-07	1.12e-06	yes	down	16130.6	9779.28	17373.3	15247.1	15771.4	8822.68	9180.99	11334.2	surface protein 1
MGG_14949	gene-MGG_14949	0.542964	-0.881072	0.000781329	0.00164835	yes	down	11.2733	7.52	12	10.6	11.22	7.57	6.99	8	hypothetical protein
MGG_15383	gene-MGG_15383	0.543102	-0.880704	0.000191948	0.00043226	yes	down	3.74667	2.28667	3.6	4.15	3.49	2.22	2.59	2.05	glutamyl-tRNA(Gln) amidotransferase
MGG_00345	gene-MGG_00345	0.543198	-0.880449	1.23e-13	5.14e-13	yes	down	14.7333	9.02667	13.16	15.81	15.23	10.59	10.07	6.42	AGC protein kinase
MGG_09571	gene-MGG_09571	0.543492	-0.87967	1.62e-35	1.39e-34	yes	down	82.93	50.53	74.71	90.3	83.78	52.28	52.14	47.17	hypothetical protein
MGG_04861	gene-MGG_04861	0.543591	-0.879407	2.11e-43	2.15e-42	yes	down	352.06	214.68	360.66	348.92	346.6	218.66	222.53	202.85	glycine cleavage system H protein
MGG_09840	gene-MGG_09840	0.543743	-0.879002	2.96e-08	9.22e-08	yes	down	21.5933	13.0933	24.09	21.2	19.49	12.25	11.57	15.46	acetylxylan esterase 2
MGG_14744	gene-MGG_14744	0.543915	-0.878547	1.67e-08	5.31e-08	yes	down	11.9867	7.29333	12.61	13.4	9.95	7.27	7.18	7.43	phosphotransferase enzyme family domain-containing protein
MGG_01978	gene-MGG_01978	0.544075	-0.878123	8.66e-47	9.47e-46	yes	down	137.803	84.13	132.46	137.16	143.79	85.18	90.2	77.01	eukaryotic translation initiation factor 3 subunit B
MGG_11530	gene-MGG_11530	0.544786	-0.87624	1.24e-09	4.22e-09	yes	down	12.33	7.37667	11.73	13.09	12.17	6.6	7.62	7.91	hypothetical protein
MGG_05296	gene-MGG_05296	0.545023	-0.875611	1.71e-18	8.85e-18	yes	down	1468.32	904.28	1606.26	1349.83	1448.87	882.84	936.28	893.72	60S ribosomal protein L34-B
MGG_11257	gene-MGG_11257	0.54506	-0.875514	2.61e-08	8.19e-08	yes	down	16.5433	10.0567	15.38	16.25	18	8.85	10.81	10.51	peptidyl-prolyl cis-trans isomerase H
MGG_02761	gene-MGG_02761	0.545647	-0.873961	8.42e-08	2.56e-07	yes	down	11.65	7.13333	11.71	11.79	11.45	8.33	6.16	6.91	pre-rRNA-processing protein IPI1
MGG_10382	gene-MGG_10382	0.546055	-0.872881	1.28e-15	5.86e-15	yes	down	40.95	25.0867	38.32	40.04	44.49	27.03	25.23	23	ribosome biogenesis protein RPF2
MGG_12637	gene-MGG_12637	0.546332	-0.872149	1.6e-12	6.37e-12	yes	down	43.41	26.5933	42.4	47.16	40.67	29.11	26.56	24.11	hypothetical protein
MGG_06617	gene-MGG_06617	0.54674	-0.871073	3.67e-21	2.1e-20	yes	down	16.3533	10.0567	15.33	17.02	16.71	10.84	10.99	8.34	hypothetical protein
MGG_07559	gene-MGG_07559	0.546977	-0.870447	3.96e-23	2.41e-22	yes	down	54.45	33.38	55.94	54.09	53.32	35.61	31.55	32.98	tripeptidyl-peptidase 1
MGG_12735	gene-MGG_12735	0.54752	-0.869016	0.000919196	0.00191711	yes	down	1.92667	1.19	1.52	1.92	2.34	1.45	1.26	0.86	alpha-mannosidase
MGG_06703	gene-MGG_06703	0.547661	-0.868645	6.79e-19	3.59e-18	yes	down	65.7333	41.6233	72.99	62.59	61.62	41.53	42.97	40.37	hypothetical protein
MGG_01287	gene-MGG_01287	0.547779	-0.868333	1.33e-16	6.35e-16	yes	down	17.5833	10.7767	15.98	18.57	18.2	10.46	11.56	10.31	farnesyltransferase subunit beta
MGG_00492	gene-MGG_00492	0.548022	-0.867695	9.64e-21	5.41e-20	yes	down	10.7967	6.65	10.23	11.19	10.97	7.15	7.06	5.74	hypothetical protein
MGG_00671	gene-MGG_00671	0.5481	-0.867489	1.08e-18	5.65e-18	yes	down	25.9533	15.69	24.38	26.89	26.59	17.07	15.43	14.57	arginase
MGG_08700	gene-MGG_08700	0.548399	-0.866701	4.18e-13	1.72e-12	yes	down	14.2733	8.69	12.14	13.67	17.01	8.8	8.7	8.57	hypothetical protein
MGG_10702	gene-MGG_10702	0.548515	-0.866396	0.00225022	0.00445762	yes	down	2.98	1.83333	2.58	3.62	2.74	2.21	1.74	1.55	hypothetical protein
MGG_04618	gene-MGG_04618	0.549211	-0.864568	7.04e-20	3.85e-19	yes	down	32.04	19.6667	31.1	31.89	33.13	18.61	19.85	20.54	amidophosphoribosyltransferase
MGG_15290	gene-MGG_15290	0.549555	-0.863663	2.56e-29	1.88e-28	yes	down	73.7733	45.6033	67.14	74.2	79.98	48.29	46.55	41.97	histidyl-tRNA synthetase
MGG_04190	gene-MGG_04190	0.54976	-0.863126	5.13e-22	3.01e-21	yes	down	26.68	16.48	24.81	27.86	27.37	17.61	17.89	13.94	hypothetical protein
MGG_03286	gene-MGG_03286	0.550025	-0.862431	9.9e-17	4.75e-16	yes	down	12.9033	7.97	11.48	13.4	13.83	8.45	8.64	6.82	hypothetical protein
MGG_04114	gene-MGG_04114	0.550089	-0.862262	2.9e-55	3.84e-54	yes	down	398.91	240.353	390.35	400.58	405.8	238.85	245.53	236.68	40S ribosomal protein S17
MGG_08171	gene-MGG_08171	0.550159	-0.862079	2.82e-17	1.39e-16	yes	down	18.9667	11.75	18.66	18.85	19.39	12.28	13.39	9.58	methylenetetrahydrofolate reductase 2
MGG_02851	gene-MGG_02851	0.550712	-0.860631	1.24e-26	8.47e-26	yes	down	129.433	79.5533	118.01	146.68	123.61	81.32	88.73	68.61	hypothetical protein
MGG_12118	gene-MGG_12118	0.550978	-0.859932	3.8e-09	1.25e-08	yes	down	8.63	5.36667	8.43	9.28	8.18	6.54	5.52	4.04	STE/STE20/YSK protein kinase
MGG_01139	gene-MGG_01139	0.551063	-0.85971	8.27e-16	3.82e-15	yes	down	19.5167	12.1233	20.57	19.58	18.4	11.04	11.55	13.78	dihydroxy-acid dehydratase
MGG_04709	gene-MGG_04709	0.551334	-0.859002	4.41e-14	1.88e-13	yes	down	11.7567	7.29333	10.35	12.69	12.23	7.86	8.32	5.7	hypothetical protein
MGG_01883	gene-MGG_01883	0.551398	-0.858834	5.06e-19	2.69e-18	yes	down	22.2667	13.7467	23.08	21.54	22.18	13.09	14.14	14.01	hypothetical protein
MGG_10327	gene-MGG_10327	0.551679	-0.858099	4.27e-59	6.01e-58	yes	down	514.317	317.977	488.91	520.88	533.16	318.42	332.76	302.75	hypothetical protein
MGG_03462	gene-MGG_03462	0.552233	-0.856651	1.74e-43	1.78e-42	yes	down	70.37	43.5	69.51	72.44	69.16	43.9	46.16	40.44	hypothetical protein
MGG_04966	gene-MGG_04966	0.552544	-0.855839	6.88e-41	6.64e-40	yes	down	119.55	73.9367	113.01	122.22	123.42	72.61	76.65	72.55	lysyl-tRNA synthetase
MGG_10321	gene-MGG_10321	0.552621	-0.855637	5.73e-06	1.5e-05	yes	down	7.36667	4.56	7.72	6.37	8.01	4.38	4.65	4.65	siroheme synthase
MGG_11708	gene-MGG_11708	0.552785	-0.85521	0.000156517	0.000356019	yes	down	20.0933	12.5233	21.75	17.34	21.19	14.65	12.11	10.81	hypothetical protein
MGG_00889	gene-MGG_00889	0.552966	-0.854738	0.000138487	0.000316908	yes	down	1.7	1.04667	1.56	1.74	1.8	1.05	0.91	1.18	modification methylase DdeI
MGG_00101	gene-MGG_00101	0.553002	-0.854644	4.91e-14	2.09e-13	yes	down	30.9867	19.2567	29.3	30.1	33.56	19.09	21.98	16.7	ATPase NPA3
MGG_06904	gene-MGG_06904	0.553008	-0.854628	7.86e-35	6.64e-34	yes	down	49.1367	30.7267	47.34	50.67	49.4	30.09	32.87	29.22	hypothetical protein
MGG_10515	gene-MGG_10515	0.553142	-0.854277	0.000265381	0.000590118	yes	down	5.86667	3.63667	6.07	6.42	5.11	3.35	4.03	3.53	hypothetical protein
MGG_11513	gene-MGG_11513	0.553695	-0.852837	4.59e-55	6.01e-54	yes	down	477.19	295.767	467.57	489.41	474.59	297.21	295.49	294.6	heat shock protein SSB1
MGG_02448	gene-MGG_02448	0.553838	-0.852463	9.87e-14	4.16e-13	yes	down	38.1967	23.79	36.54	37.76	40.29	24.7	26.69	19.98	hypothetical protein
MGG_01888	gene-MGG_01888	0.553873	-0.852372	0.00502669	0.0095055	yes	down	2.22667	1.38333	2.36	1.87	2.45	1.22	1.63	1.3	WD repeat-containing protein
MGG_18052	gene-MGG_18052	0.554275	-0.851326	2.02e-06	5.51e-06	yes	down	6.50333	4.05333	6.32	6.77	6.42	4.69	4	3.47	hypothetical protein
MGG_02956	gene-MGG_02956	0.554724	-0.850158	2e-17	9.89e-17	yes	down	33.6	20.9533	35.25	34.04	31.51	21.7	19.29	21.87	hypothetical protein
MGG_12313	gene-MGG_12313	0.554882	-0.849746	8.71e-12	3.34e-11	yes	down	19.0133	9.26333	16.87	14.78	25.39	10.28	8.71	8.8	hypothetical protein
MGG_04668	gene-MGG_04668	0.55498	-0.849493	0.000773069	0.00163249	yes	down	5.11667	3.17333	4.68	5.4	5.27	2.57	3.88	3.07	hypothetical protein
MGG_02619	gene-MGG_02619	0.555052	-0.849305	9.69e-18	4.86e-17	yes	down	16.2833	10.0833	16.72	15.9	16.23	9.92	9.73	10.6	hydroxyquinol 1,2-dioxygenase
MGG_05959	gene-MGG_05959	0.55507	-0.849259	3.53e-32	2.78e-31	yes	down	85.86	53.5833	84.86	88.64	84.08	58.03	57.02	45.7	bZIP transcription factor HapX
MGG_02760	gene-MGG_02760	0.555498	-0.848148	4.88e-12	1.9e-11	yes	down	32.9067	20.4333	31.61	32.73	34.38	20.52	19.79	20.99	hypothetical protein
MGG_04868	gene-MGG_04868	0.555511	-0.848111	2.02e-18	1.04e-17	yes	down	18.89	11.73	17.4	20.27	19	11.43	12.34	11.42	purine-cytosine permease FCY22
MGG_12574	gene-MGG_12574	0.555666	-0.84771	2.88e-47	3.19e-46	yes	down	178.773	111.307	175.16	182.56	178.6	111.45	115.52	106.95	aspartyl-tRNA synthetase
MGG_00845	gene-MGG_00845	0.555679	-0.847678	2.11e-22	1.25e-21	yes	down	31.9267	19.93	28.3	33.81	33.67	21.72	21.36	16.71	hypothetical protein
MGG_17944	gene-MGG_17944	0.555727	-0.847552	0.000160005	0.000363641	yes	down	19.6033	12.1367	20.84	24.07	13.9	13.25	10.42	12.74	phosducin family protein
MGG_03331	gene-MGG_03331	0.556007	-0.846824	6.6e-10	2.28e-09	yes	down	24.0267	14.96	23.24	26.65	22.19	17.25	13.46	14.17	hypothetical protein
MGG_06096	gene-MGG_06096	0.556008	-0.846821	8.65e-15	3.82e-14	yes	down	18.2233	11.3633	16.49	18.94	19.24	11.09	13.02	9.98	tRNA wybutosine-synthesizing protein 1
MGG_08908	gene-MGG_08908	0.556029	-0.846768	1.69e-18	8.78e-18	yes	down	48.8233	30.41	49.62	49.25	47.6	30.69	30.47	30.07	mRNA turnover protein 4
MGG_09516	gene-MGG_09516	0.556272	-0.846139	4.99e-14	2.13e-13	yes	down	14.1967	8.88667	14.39	14	14.2	8.83	10.24	7.59	alpha-methylacyl-CoA racemase
MGG_00204	gene-MGG_00204	0.556329	-0.84599	2.62e-08	8.22e-08	yes	down	7.11	4.45	7.22	6.63	7.48	5.17	4.17	4.01	hypothetical protein
MGG_06678	gene-MGG_06678	0.556396	-0.845816	5.58e-07	1.58e-06	yes	down	10.9533	6.89333	13.85	9.2	9.81	7.21	7.2	6.27	ribose-phosphate pyrophosphokinase 5
MGG_03857	gene-MGG_03857	0.55643	-0.845729	1.06e-37	9.58e-37	yes	down	104.687	65.2967	100.98	104.18	108.9	65.99	68.06	61.84	T-complex protein 1 subunit zeta
MGG_14875	gene-MGG_14875	0.556563	-0.845384	1.62e-16	7.73e-16	yes	down	72.2033	44.8833	67.65	75.76	73.2	42.56	49.15	42.94	BolA domain-containing protein
MGG_10692	gene-MGG_10692	0.5567	-0.845028	1.09e-18	5.66e-18	yes	down	36.1733	22.5833	39.2	34.25	35.07	23.11	21.89	22.75	hypothetical protein
MGG_15861	gene-MGG_15861	0.556964	-0.844345	8.59e-30	6.41e-29	yes	down	65.9367	41.2767	64.79	65.88	67.14	43.97	45.42	34.44	hypothetical protein
MGG_07059	gene-MGG_07059	0.557431	-0.843135	1.29e-18	6.71e-18	yes	down	11.3333	7.1	10.52	11.74	11.74	7.3	7.08	6.92	pre-mRNA-splicing factor ATP-dependent RNA helicase prp22
MGG_03916	gene-MGG_03916	0.55762	-0.842647	2.78e-11	1.04e-10	yes	down	62.92	42.0433	46.07	80.06	62.63	32.81	58.02	35.3	hypothetical protein
MGG_09297	gene-MGG_09297	0.557721	-0.842385	1.38e-25	9.09e-25	yes	down	80.1133	49.07	75.57	81.82	82.95	49.28	47.51	50.42	hypothetical protein
MGG_04548	gene-MGG_04548	0.558196	-0.841155	3.52e-11	1.31e-10	yes	down	13.8233	8.52667	13.15	14.14	14.18	9.26	8.65	7.67	4-coumarate-CoA ligase
MGG_11468	gene-MGG_11468	0.558315	-0.84085	0.00371875	0.00716359	yes	down	5.42	3.36667	4.54	6.21	5.51	2.72	3.98	3.4	hypothetical protein
MGG_02860	gene-MGG_02860	0.558472	-0.840443	1e-05	2.57e-05	yes	down	21.2767	13.2233	23	21.06	19.77	10.57	12.61	16.49	hypothetical protein
MGG_02442	gene-MGG_02442	0.558828	-0.839523	1.35e-30	1.03e-29	yes	down	37.4233	23.1067	35.82	38.21	38.24	25.68	22.92	20.72	zinc metalloprotease
MGG_06913	gene-MGG_06913	0.558877	-0.839398	3.71e-36	3.22e-35	yes	down	203.503	127.397	184.04	208.82	217.65	130.01	135.56	116.62	seryl-tRNA synthetase
MGG_13834	gene-MGG_13834	0.558881	-0.839386	8.73e-17	4.2e-16	yes	down	42.9133	26.4067	44.67	43.4	40.67	24.79	29.98	24.45	YjeF
MGG_10035	gene-MGG_10035	0.559316	-0.838265	1.31e-32	1.05e-31	yes	down	128.977	80.81	131.78	125.2	129.95	79.77	81.61	81.05	hypothetical protein
MGG_15074	gene-MGG_15074	0.559505	-0.837778	0.00217294	0.00431177	yes	down	8.10667	5.02667	7.68	8.41	8.23	4.37	4.42	6.29	hypothetical protein
MGG_09394	gene-MGG_09394	0.559597	-0.837539	8.82e-15	3.88e-14	yes	down	21.6833	13.58	20.73	20.76	23.56	13.11	14.12	13.51	hypothetical protein
MGG_11878	gene-MGG_11878	0.559919	-0.836709	4.12e-13	1.69e-12	yes	down	15.8933	9.91667	15.61	15.01	17.06	10.28	10.42	9.05	hypothetical protein
MGG_09181	gene-MGG_09181	0.559996	-0.83651	1.96e-19	1.06e-18	yes	down	122.723	76.9133	127.86	115.33	124.98	71.24	78.07	81.43	hydroxymethylglutaryl-CoA lyase
MGG_16739	gene-MGG_16739	0.560016	-0.836461	1.88e-36	1.64e-35	yes	down	774.893	485.833	768.33	749.78	806.57	464.73	498.14	494.63	eukaryotic translation initiation factor 5A
MGG_06917	gene-MGG_06917	0.560181	-0.836036	7.5e-29	5.43e-28	yes	down	56.3333	31.5933	51.88	58.15	58.97	33.91	30.59	30.28	GTP cyclohydrolase II
MGG_05809	gene-MGG_05809	0.560656	-0.834811	2.66e-07	7.75e-07	yes	down	5.93333	3.72	5.67	5.9	6.23	3.39	3.96	3.81	alpha-N-arabinofuranosidase A
MGG_04863	gene-MGG_04863	0.560804	-0.834432	4.6e-17	2.24e-16	yes	down	46.2433	29.2033	41.72	47.98	49.03	33.87	31.38	22.36	Cullin-associated NEDD8-dissociated protein 2
MGG_06044	gene-MGG_06044	0.561136	-0.833579	8.09e-60	1.15e-58	yes	down	2898.28	1821.63	2852.92	2936.44	2905.48	1788.15	1901.9	1774.83	ubiquitin-60S ribosomal protein L40
MGG_07098	gene-MGG_07098	0.561228	-0.83334	1.98e-15	8.95e-15	yes	down	14.79	9.33333	13.33	15.71	15.33	10.52	9.72	7.76	condensin subunit
MGG_08499	gene-MGG_08499	0.561458	-0.83275	0.0132285	0.0235394	yes	down	1.80333	1.14	1.91	1.94	1.56	0.78	1.65	0.99	manganese lipoxygenase
MGG_02484	gene-MGG_02484	0.561687	-0.832162	7.28e-06	1.89e-05	yes	down	8.03	5.05	8.69	7.11	8.29	4.65	5	5.5	hypothetical protein
MGG_08891	gene-MGG_08891	0.561772	-0.831945	0.000113618	0.000262375	yes	down	4.22	2.66	4.36	4.34	3.96	2.97	2.54	2.47	maltose permease
MGG_03551	gene-MGG_03551	0.562169	-0.830925	5.09e-27	3.5e-26	yes	down	65.7933	41.4933	62.75	65.75	68.88	39.67	46.99	37.82	threonyl-tRNA synthetase
MGG_08711	gene-MGG_08711	0.562242	-0.830738	7.82e-24	4.9e-23	yes	down	33.3667	21.0233	32.24	32.17	35.69	19.52	22.29	21.26	carboxypeptidase A2
MGG_10233	gene-MGG_10233	0.562318	-0.830543	7.19e-17	3.47e-16	yes	down	38.8267	24.4867	37.45	38.07	40.96	26.25	24.14	23.07	hypothetical protein
MGG_02390	gene-MGG_02390	0.5627	-0.829562	6.09e-37	5.4e-36	yes	down	103.743	65.33	96.44	106.91	107.88	67.66	64.02	64.31	hypothetical protein
MGG_06659	gene-MGG_06659	0.563118	-0.828491	4.6e-08	1.42e-07	yes	down	11.8067	7.44333	11.11	12.98	11.33	7.57	7.77	6.99	hypothetical protein
MGG_06151	gene-MGG_06151	0.563207	-0.828263	6.49e-08	1.98e-07	yes	down	21.57	13.6067	21.59	21.66	21.46	12.26	15.5	13.06	cytosolic Fe-S cluster assembly factor NBP35
MGG_13269	gene-MGG_13269	0.563486	-0.827549	0.00686689	0.0127336	yes	down	3.11667	1.95667	3.17	3.93	2.25	1.74	2.02	2.11	hypothetical protein
MGG_12006	gene-MGG_12006	0.56381	-0.826718	7.09e-06	1.85e-05	yes	down	10.4633	6.62667	12.62	9.77	9	6.55	6.49	6.84	glucanase B
MGG_05196	gene-MGG_05196	0.564148	-0.825854	3.54e-16	1.66e-15	yes	down	16.85	10.67	17.26	16.86	16.43	11.01	11.04	9.96	acetoacetate-CoA ligase
MGG_00410	gene-MGG_00410	0.564165	-0.82581	2.73e-09	9.08e-09	yes	down	22.4633	14.2067	22.25	25.01	20.13	13.89	15.72	13.01	hypothetical protein
MGG_17668	gene-MGG_17668	0.564713	-0.824411	8.44e-05	0.000197683	yes	down	4.68667	2.97667	4.35	5.05	4.66	4.17	2.03	2.73	CGI121
MGG_08923	gene-MGG_08923	0.565197	-0.823173	2.73e-25	1.78e-24	yes	down	93.72	59.32	97.57	89.75	93.84	58.24	58.94	60.78	threonine synthase
MGG_04654	gene-MGG_04654	0.565236	-0.823075	2.38e-07	6.97e-07	yes	down	18.59	11.8233	21.6	16.16	18.01	10.85	13.3	11.32	hypothetical protein
MGG_00631	gene-MGG_00631	0.565269	-0.822992	9.17e-29	6.61e-28	yes	down	49.6133	33.5433	48.46	48.74	51.64	34.87	35.87	29.89	hypothetical protein
MGG_13156	gene-MGG_13156	0.565413	-0.822622	6.5e-29	4.72e-28	yes	down	98.2333	62.04	102.7	98.8	93.2	64.05	66.9	55.17	hypothetical protein
MGG_05614	gene-MGG_05614	0.565511	-0.822373	1.03e-12	4.16e-12	yes	down	28.2867	17.9833	27.56	28.71	28.59	18.11	20.48	15.36	unsaturated glucuronyl hydrolase
MGG_11605	gene-MGG_11605	0.56564	-0.822044	0.00121283	0.002488	yes	down	2.07	1.31667	1.97	2.27	1.97	1.46	1.32	1.17	hypothetical protein
MGG_15020	gene-MGG_15020	0.565981	-0.821175	3e-11	1.12e-10	yes	down	18.9233	12.0333	17.97	19.02	19.78	12.53	13.06	10.51	amino acid permease
MGG_00308	gene-MGG_00308	0.566032	-0.821043	9.08e-06	2.34e-05	yes	down	5.71	3.63	6.03	5.12	5.98	3.51	3.92	3.46	hypothetical protein
MGG_08596	gene-MGG_08596	0.56625	-0.82049	9.32e-28	6.59e-27	yes	down	63.0633	40.06	61.59	64.88	62.72	39.95	43.63	36.6	phospho-2-dehydro-3-deoxyheptonate aldolase
MGG_13126	gene-MGG_13126	0.566519	-0.819804	3.35e-08	1.04e-07	yes	down	38.9567	24.73	39.11	37.68	40.08	23.32	26.79	24.08	hypothetical protein
MGG_03303	gene-MGG_03303	0.566729	-0.81927	5.32e-05	0.000127248	yes	down	4.7	3.04333	3.91	4.7	5.49	3.01	3.73	2.39	hypothetical protein
MGG_11611	gene-MGG_11611	0.566857	-0.818944	4.42e-37	3.94e-36	yes	down	146.55	92.2233	139.83	156.35	143.47	93.85	92.32	90.5	hypothetical protein
MGG_08055	gene-MGG_08055	0.566949	-0.818709	2.53e-29	1.86e-28	yes	down	846.613	537.133	879.93	817.87	842.04	511.97	535.04	564.39	hypothetical protein
MGG_02467	gene-MGG_02467	0.567237	-0.817977	1.7e-23	1.05e-22	yes	down	301.897	192.053	318.98	297.49	289.22	177.53	207.84	190.79	ribonucleoprotein-associated protein
MGG_08892	gene-MGG_08892	0.56739	-0.817588	1.02e-05	2.62e-05	yes	down	8.39333	5.33333	7.41	9.3	8.47	5.74	5.48	4.78	hypothetical protein
MGG_00931	gene-MGG_00931	0.567426	-0.817496	0.00434066	0.00826859	yes	down	2.14333	1.36667	2.08	2.49	1.86	1.43	1.28	1.39	alpha/beta hydrolase
MGG_12159	gene-MGG_12159	0.567815	-0.816507	5.16e-22	3.03e-21	yes	down	45.84	28.9667	42.75	46.15	48.62	27.77	30.65	28.48	uridine kinase
MGG_10052	gene-MGG_10052	0.567994	-0.816052	1.14e-29	8.48e-29	yes	down	218.203	138.57	211.74	225.95	216.92	138.55	136.95	140.21	hypoxanthine guanine phosphoribosyltransferase
MGG_03763	gene-MGG_03763	0.568878	-0.813809	1.2e-16	5.73e-16	yes	down	14.7733	9.16	14.16	16.08	14.08	10.03	9.71	7.74	hypothetical protein
MGG_10571	gene-MGG_10571	0.569421	-0.812433	0.00687862	0.0127531	yes	down	2.73333	1.73667	2.46	3.57	2.17	1.95	1.69	1.57	hypothetical protein
MGG_02393	gene-MGG_02393	0.569587	-0.812013	1.12e-44	1.18e-43	yes	down	472.53	301.213	449.12	478.16	490.31	304.01	297.95	301.68	cutinase
MGG_04504	gene-MGG_04504	0.569632	-0.811898	4.71e-28	3.36e-27	yes	down	135.837	86.7967	124.69	140.61	142.21	93.76	89.62	77.01	translation machinery-associated protein 22
MGG_02400	gene-MGG_02400	0.569975	-0.81103	1.77e-25	1.16e-24	yes	down	89.1733	56.93	89.5	87.2	90.82	58.37	55.79	56.63	pirin
MGG_17373	gene-MGG_17373	0.570196	-0.810471	0.000345013	0.000756577	yes	down	3.24	2.09667	3.44	3.5	2.78	2.85	2.15	1.29	hypothetical protein
MGG_08918	gene-MGG_08918	0.570236	-0.81037	3.09e-05	7.55e-05	yes	down	7.62	4.24	6.81	7.15	8.9	4.57	3.16	4.99	ATP-binding cassette sub-family G member 2
MGG_04144	gene-MGG_04144	0.570353	-0.810073	7.11e-20	3.88e-19	yes	down	22.9767	14.7033	20.41	24.98	23.54	16.56	14.84	12.71	sulfite reductase
MGG_01909	gene-MGG_01909	0.570504	-0.809692	3e-25	1.95e-24	yes	down	148.317	94.71	150.01	149.83	145.11	92	96.44	95.69	hypothetical protein
MGG_15960	gene-MGG_15960	0.570713	-0.809162	1.42e-18	7.39e-18	yes	down	109.643	70.01	107.82	109.46	111.65	74.54	65.3	70.19	hypothetical protein
MGG_07751	gene-MGG_07751	0.570935	-0.808601	9.91e-14	4.17e-13	yes	down	10.8633	6.94667	11.13	11.02	10.44	6.98	6.96	6.9	hypothetical protein
MGG_11541	gene-MGG_11541	0.570947	-0.808572	2.41e-30	1.82e-29	yes	down	37.4133	24	36.27	38.54	37.43	25.57	25.43	21	phosphoribosylformylglycinamidine synthase
MGG_10562	gene-MGG_10562	0.570951	-0.808562	4.26e-12	1.67e-11	yes	down	10.4067	6.67333	9.82	11.04	10.36	6.81	6.58	6.63	hypothetical protein
MGG_05232	gene-MGG_05232	0.571061	-0.808284	7.72e-29	5.58e-28	yes	down	4253.28	2712.09	4304.54	4222.94	4232.37	2722.02	2529.35	2884.91	hypothetical protein
MGG_00957	gene-MGG_00957	0.571218	-0.807886	1.93e-35	1.65e-34	yes	down	73.86	47.2867	73.29	74.76	73.53	49.1	47.12	45.64	ABC1 family protein
MGG_12929	gene-MGG_12929	0.571459	-0.807279	4.87e-20	2.68e-19	yes	down	36.21	21.5067	38.23	37.72	32.68	20.94	22.51	21.07	glyoxylate reductase
MGG_12117	gene-MGG_12117	0.571827	-0.806348	1.76e-07	5.2e-07	yes	down	3.86	2.48	3.43	4.29	3.86	2.86	2.56	2.02	hypothetical protein
MGG_01026	gene-MGG_01026	0.571843	-0.806309	2.53e-43	2.57e-42	yes	down	302.32	193.247	298.04	300.85	308.07	192.08	194.87	192.79	hydroxymethylglutaryl-CoA synthase
MGG_01755	gene-MGG_01755	0.572599	-0.804402	1.34e-27	9.42e-27	yes	down	93.4967	59.4933	88.66	93.91	97.92	62.45	56.43	59.6	acetyl-CoA acetyltransferase
MGG_17504	gene-MGG_17504	0.5729	-0.803644	9.37e-36	8.08e-35	yes	down	397.89	254.91	389.02	403.61	401.04	251.09	251.38	262.26	iron sulfur assembly protein 1
MGG_10188	gene-MGG_10188	0.572909	-0.803623	1.04e-11	3.97e-11	yes	down	14.61	9.38	15.15	13.95	14.73	9.72	8.96	9.46	AMP-binding domain-containing protein
MGG_02472	gene-MGG_02472	0.573001	-0.803391	0.00565848	0.0106189	yes	down	9.23	5.86	8.56	8.47	10.66	4.36	5.49	7.73	hypothetical protein
MGG_06936	gene-MGG_06936	0.573023	-0.803334	1.68e-44	1.76e-43	yes	down	358.287	230.06	353.06	362.49	359.31	227.05	242.46	220.67	elongation factor 1-gamma
MGG_00517	gene-MGG_00517	0.57327	-0.802714	2.75e-25	1.79e-24	yes	down	60.4167	38.49	58.59	62.47	60.19	38.94	40.82	35.71	pyridoxal kinase
MGG_09462	gene-MGG_09462	0.574451	-0.799743	0.000138372	0.000316714	yes	down	16.9933	10.9833	21.4	14.5	15.08	9.19	12.18	11.58	inositol oxygenase 1
MGG_03994	gene-MGG_03994	0.574718	-0.799074	2.63e-24	1.67e-23	yes	down	50.0933	32.2767	43.72	53.18	53.38	33.97	34.02	28.84	importin alpha re-exporter
MGG_06204	gene-MGG_06204	0.574747	-0.799001	2.14e-38	1.97e-37	yes	down	91.5933	58.9467	88.76	94.32	91.7	59.18	59.99	57.67	hypothetical protein
MGG_11223	gene-MGG_11223	0.575016	-0.798326	0.000398954	0.000870014	yes	down	5.90333	3.81	5.63	5.11	6.97	3.77	4.17	3.49	enoyl-CoA hydratase/isomerase
MGG_09922	gene-MGG_09922	0.575176	-0.797925	2.36e-39	2.22e-38	yes	down	124.287	80.0067	126.68	125.06	121.12	82.56	82.53	74.93	beta-hexosaminidase subunit beta
MGG_04155	gene-MGG_04155	0.575382	-0.797408	1.55e-23	9.63e-23	yes	down	103.12	61.7833	97.32	98.91	113.13	59	66.11	60.24	hypothetical protein
MGG_03693	gene-MGG_03693	0.575717	-0.796568	4.08e-10	1.43e-09	yes	down	6.30333	4.06667	5.35	6.69	6.87	4.22	4.38	3.6	hypothetical protein
MGG_14690	gene-MGG_14690	0.575856	-0.79622	2.95e-06	7.93e-06	yes	down	11.3433	7.06667	11.57	10.37	12.09	7.24	6.12	7.84	sodium bile acid symporter family protein
MGG_06807	gene-MGG_06807	0.576115	-0.795572	4.31e-09	1.42e-08	yes	down	19.4967	12.5733	17.02	20.58	20.89	12.38	13.88	11.46	hypothetical protein
MGG_03899	gene-MGG_03899	0.576167	-0.795442	3e-06	8.04e-06	yes	down	3.64	2.34667	2.78	4.12	4.02	2.65	2.35	2.04	hypothetical protein
MGG_16669	gene-MGG_16669	0.576985	-0.793393	1.92e-16	9.12e-16	yes	down	17.8733	11.54	16.45	17.88	19.29	11.96	11.27	11.39	CAMK protein kinase
MGG_18082	gene-MGG_18082	0.577023	-0.793298	0.00287464	0.00562531	yes	down	115.667	74.96	85.24	138.67	123.09	91.1	81.95	51.83	hypothetical protein
MGG_06203	gene-MGG_06203	0.577829	-0.791287	8.33e-24	5.21e-23	yes	down	609.043	395.923	662.38	595.94	568.81	375.77	400.75	411.25	high-affinity glucose transporter RGT2
MGG_00075	gene-MGG_00075	0.577933	-0.791027	7.67e-15	3.4e-14	yes	down	26.16	16.6133	26.8	26.59	25.09	15.47	17.2	17.17	L-galactose dehydrogenase
MGG_03940	gene-MGG_03940	0.578017	-0.790816	2.22e-20	1.23e-19	yes	down	60	38.62	55.61	64.36	60.03	37.49	37.59	40.78	hypothetical protein
MGG_12805	gene-MGG_12805	0.57815	-0.790483	4.2e-39	3.92e-38	yes	down	279.083	169.923	251.23	291.77	294.25	178.82	173.21	157.74	tryptophan synthase
MGG_00583	gene-MGG_00583	0.578611	-0.789334	3.33e-08	1.03e-07	yes	down	4.84	3.14	4.88	4.97	4.67	3.3	3.16	2.96	beta-galactosidase
MGG_06481	gene-MGG_06481	0.578888	-0.788644	6.16e-08	1.88e-07	yes	down	8.53667	5.55333	6.94	9.95	8.72	6.38	6.02	4.26	tRNA pseudouridine synthase D
MGG_13245	gene-MGG_13245	0.578953	-0.788483	3.08e-17	1.51e-16	yes	down	65.6767	42.4633	60.31	69.95	66.77	44.63	39.35	43.41	translation regulator GCD7
MGG_11289	gene-MGG_11289	0.579331	-0.78754	1.35e-05	3.42e-05	yes	down	3.6	2.34	3.65	3.61	3.54	2.34	2.42	2.26	hypothetical protein
MGG_17694	gene-MGG_17694	0.57945	-0.787244	1.74e-18	9.03e-18	yes	down	58.0467	37.7467	60.79	58.47	54.88	39.45	37.96	35.83	hypothetical protein
MGG_16532	gene-MGG_16532	0.579673	-0.786688	0.003357	0.00650094	yes	down	5.18333	3.35667	4.87	5.75	4.93	4.16	2.65	3.26	hypothetical protein
MGG_03871	gene-MGG_03871	0.580007	-0.785857	1.6e-31	1.24e-30	yes	down	108.463	70.56	100.67	113.25	111.47	77.46	70.13	64.09	hypothetical protein
MGG_17308	gene-MGG_17308	0.580045	-0.785763	2.83e-11	1.06e-10	yes	down	52.7333	33.9867	54.21	55.39	48.6	31.55	34.27	36.14	hypothetical protein
MGG_12967	gene-MGG_12967	0.580265	-0.785217	2.81e-14	1.21e-13	yes	down	15.7233	10.22	14.29	16.52	16.36	9.95	11.44	9.27	hypothetical protein
MGG_16761	gene-MGG_16761	0.580428	-0.784812	2.17e-10	7.74e-10	yes	down	52.0567	33.78	47.94	52.2	56.03	30.21	37.16	33.97	DASH complex subunit dad4
MGG_07782	gene-MGG_07782	0.580816	-0.783847	0.000436698	0.000947652	yes	down	13.3667	8.68667	13.42	12.87	13.81	8.52	8.59	8.95	dehydroquinase class II
MGG_16134	gene-MGG_16134	0.580823	-0.78383	2.81e-07	8.18e-07	yes	down	6.75667	4.47333	7.02	7.28	5.97	4.62	4.09	4.71	hypothetical protein
MGG_11758	gene-MGG_11758	0.581303	-0.782639	3.38e-07	9.77e-07	yes	down	2.60667	1.70667	2.75	2.65	2.42	2.01	1.66	1.45	hypothetical protein
MGG_06269	gene-MGG_06269	0.581449	-0.782275	3.1e-38	2.83e-37	yes	down	1381.9	907.323	1386.34	1373.69	1385.67	878.56	918.96	924.45	60S ribosomal protein L2
MGG_03360	gene-MGG_03360	0.581751	-0.781527	4.41e-32	3.46e-31	yes	down	135.35	88.0967	135.11	137.52	133.42	84.32	89.96	90.01	carboxylic acid transporter
MGG_00559	gene-MGG_00559	0.581787	-0.781438	3.39e-12	1.33e-11	yes	down	28.71	18.71	27.77	30.64	27.72	17.76	20.63	17.74	tRNA (uridine-2'-O-)-methyltransferase TRM7
MGG_06512	gene-MGG_06512	0.582344	-0.780055	0.000113161	0.000261432	yes	down	3.70333	2.41	3.3	4.29	3.52	2.54	2.34	2.35	glucan 1,3-beta-glucosidase 2
MGG_09860	gene-MGG_09860	0.582453	-0.779786	0.000636843	0.00135674	yes	down	4.49	2.94667	4.93	5.41	3.13	3.06	3.32	2.46	hypothetical protein
MGG_03853	gene-MGG_03853	0.582709	-0.779152	2.22e-09	7.44e-09	yes	down	24.19	15.7733	24.34	24.02	24.21	13.67	17.3	16.35	aldose 1-epimerase
MGG_05234	gene-MGG_05234	0.582824	-0.778867	0.00656243	0.0122053	yes	down	3.17333	2.06667	3.07	3.36	3.09	1.72	2.46	2.02	hypothetical protein
MGG_05349	gene-MGG_05349	0.582989	-0.77846	4.2e-06	1.11e-05	yes	down	10.7033	6.95667	9.93	11.44	10.74	6.8	6.72	7.35	hypothetical protein
MGG_09223	gene-MGG_09223	0.583388	-0.777473	4.83e-06	1.28e-05	yes	down	6.53333	4.26333	5.87	7.68	6.05	4.06	4.71	4.02	alpha-N-arabinofuranosidase 2
MGG_09641	gene-MGG_09641	0.583457	-0.777302	2.48e-53	3.12e-52	yes	down	3498.47	2315.49	3353.08	3523.84	3618.48	2345.22	2374.8	2226.45	hypothetical protein
MGG_01471	gene-MGG_01471	0.583512	-0.777167	1.09e-24	6.95e-24	yes	down	100.947	65.8433	101.08	102.6	99.16	65.38	66.25	65.9	import inner membrane translocase subunit tim-21
MGG_16591	gene-MGG_16591	0.583537	-0.777104	2.08e-09	6.97e-09	yes	down	34.9067	22.3067	36.44	38.42	29.86	21.41	23.47	22.04	hypothetical protein
MGG_01154	gene-MGG_01154	0.584062	-0.775807	6.53e-10	2.26e-09	yes	down	17.0967	11.19	17.21	16.71	17.37	10.77	11.82	10.98	hypothetical protein
MGG_04085	gene-MGG_04085	0.584121	-0.775661	2.77e-56	3.73e-55	yes	down	902.423	590.397	862.7	938.65	905.92	597.89	604.14	569.16	hypothetical protein
MGG_15288	gene-MGG_15288	0.584235	-0.77538	3.78e-18	1.92e-17	yes	down	24.4333	16.0033	23.62	26.84	22.84	16.16	16.69	15.16	N-acetylated-alpha-linked acidic dipeptidase 2
MGG_06133	gene-MGG_06133	0.584273	-0.775284	1.33e-28	9.58e-28	yes	down	351.29	229.413	342.97	358.35	352.55	214.02	234.09	240.13	C-4 methylsterol oxidase
MGG_15637	gene-MGG_15637	0.584427	-0.774905	5.37e-15	2.39e-14	yes	down	71.0333	46.5533	71.34	74.58	67.18	47.76	48.67	43.23	hypothetical protein
MGG_07915	gene-MGG_07915	0.584482	-0.774768	3.28e-24	2.07e-23	yes	down	55.2	36.12	54.41	57.31	53.88	36.87	35.89	35.6	hypothetical protein
MGG_01302	gene-MGG_01302	0.584882	-0.773782	4.39e-10	1.54e-09	yes	down	17.6533	11.6133	17.5	18.04	17.42	12.13	12.79	9.92	hypothetical protein
MGG_05797	gene-MGG_05797	0.585448	-0.772386	8.88e-13	3.59e-12	yes	down	23.9667	15.68	22.05	27.12	22.73	16.53	15.07	15.44	hypothetical protein
MGG_17679	gene-MGG_17679	0.585537	-0.772168	0.0013999	0.0028519	yes	down	25.7533	16.8367	18.91	32.38	25.97	14.53	20.46	15.52	hypothetical protein
MGG_15038	gene-MGG_15038	0.5856	-0.772012	3.39e-29	2.48e-28	yes	down	56.99	37.4	55.2	57.81	57.96	40.56	35.57	36.07	glycine dehydrogenase
MGG_06948	gene-MGG_06948	0.585629	-0.771941	2.47e-14	1.07e-13	yes	down	37.2267	24.46	36	37.27	38.41	24.89	25.81	22.68	hypothetical protein
MGG_16188	gene-MGG_16188	0.585873	-0.771341	0.00390884	0.00750119	yes	down	9.75667	6.40333	10.04	7.01	12.22	6.51	5.88	6.82	hypothetical protein
MGG_06095	gene-MGG_06095	0.586038	-0.770934	5.51e-29	4e-28	yes	down	260.357	170.553	250.76	273.96	256.35	175.8	162.45	173.41	cysteine dioxygenase
MGG_01568	gene-MGG_01568	0.586327	-0.770222	0.000111315	0.000257279	yes	down	11.3	7.43667	10.79	13.08	10.03	6.09	10.06	6.16	hypothetical protein
MGG_13986	gene-MGG_13986	0.586597	-0.769558	1.26e-30	9.57e-30	yes	down	312.663	205.237	306.2	329.84	301.95	190.74	220.05	204.92	Delta(14)-sterol reductase
MGG_05024	gene-MGG_05024	0.586624	-0.769493	1.35e-18	7.02e-18	yes	down	40.0833	26.32	35.73	42.06	42.46	25.7	28.52	24.74	N-carbamoyl-L-amino acid hydrolase
MGG_05447	gene-MGG_05447	0.586653	-0.76942	1.2e-17	6e-17	yes	down	185.017	121.543	193.61	182.31	179.13	131.85	112.18	120.6	glutaredoxin-C2
MGG_12474	gene-MGG_12474	0.586702	-0.7693	6.92e-08	2.11e-07	yes	down	9.45667	6.22	9.24	9.68	9.45	6.6	6.12	5.94	5'-nucleotidase
MGG_01060	gene-MGG_01060	0.586842	-0.768956	0.000532049	0.00114312	yes	down	6.98333	4.57	7.33	7.33	6.29	4.43	4.13	5.15	hypothetical protein
MGG_08118	gene-MGG_08118	0.587344	-0.767722	5.7e-30	4.27e-29	yes	down	83.7333	55.3367	81.21	86.47	83.52	60.16	53.69	52.16	hypothetical protein
MGG_15606	gene-MGG_15606	0.587495	-0.767352	9.68e-38	8.76e-37	yes	down	213.347	140.28	203.53	224.1	212.41	145.43	137.78	137.63	hypothetical protein
MGG_10826	gene-MGG_10826	0.587617	-0.767051	2.64e-08	8.28e-08	yes	down	6.73	4.44333	6.62	6.77	6.8	4.29	5.2	3.84	TTK protein kinase
MGG_00198	gene-MGG_00198	0.587668	-0.766926	2.25e-26	1.52e-25	yes	down	1601.51	1052.19	1666.38	1592.89	1545.25	1017.48	1023.76	1115.33	flavohemoglobin
MGG_03332	gene-MGG_03332	0.58829	-0.7654	1.07e-08	3.43e-08	yes	down	10.76	7.10333	10.5	10.96	10.82	6.33	7.08	7.9	copper amine oxidase 1
MGG_00750	gene-MGG_00750	0.588337	-0.765285	7.2e-43	7.27e-42	yes	down	284.443	187.897	281.92	284	287.41	194.65	198.99	170.05	cytochrome b-245 heavychain subunit beta
MGG_10534	gene-MGG_10534	0.588624	-0.764582	5.7e-05	0.000135625	yes	down	5.50667	3.61667	4.88	6.57	5.07	3.5	3.86	3.49	multidrug and toxin extrusion protein 1
MGG_06578	gene-MGG_06578	0.588698	-0.764401	1.04e-16	4.97e-16	yes	down	59.3767	37.1867	57.95	59.29	60.89	38.52	37.16	35.88	hypothetical protein
MGG_10413	gene-MGG_10413	0.588817	-0.764108	0.000185185	0.000417649	yes	down	5.88667	3.87333	5.45	6.84	5.37	4.11	3.8	3.71	NADP-dependent leukotriene B4 12-hydroxydehydrogenase
MGG_07974	gene-MGG_07974	0.588903	-0.763899	1.8e-17	8.9e-17	yes	down	60.2467	39.3933	60.63	59.17	60.94	38.11	37.83	42.24	C-signal protein
MGG_15494	gene-MGG_15494	0.588961	-0.763757	2.03e-10	7.25e-10	yes	down	9.31333	6.18333	7.18	10.51	10.25	6.59	6.22	5.74	hypothetical protein
MGG_01437	gene-MGG_01437	0.588998	-0.763664	0.00542956	0.010211	yes	down	5.01	3.31	5.81	4.83	4.39	2.47	4.05	3.41	cyclin domain-containing protein
MGG_03699	gene-MGG_03699	0.589213	-0.76314	2.42e-35	2.07e-34	yes	down	179.613	118.37	169.81	190.67	178.36	118.26	119.11	117.74	inosine-5'-monophosphate dehydrogenase IMD4
MGG_13029	gene-MGG_13029	0.589352	-0.762799	4.85e-06	1.28e-05	yes	down	13.7633	9.10667	14.64	13.75	12.9	9.31	9.21	8.8	hypothetical protein
MGG_07384	gene-MGG_07384	0.589886	-0.761493	1.6e-41	1.57e-40	yes	down	332.27	219.55	332.65	333.47	330.69	217.78	224.22	216.65	cystathionine beta-synthase
MGG_11165	gene-MGG_11165	0.589888	-0.761486	3.83e-25	2.48e-24	yes	down	40.3833	26.76	38.4	41.02	41.73	28.67	28.13	23.48	hypothetical protein
MGG_01782	gene-MGG_01782	0.590303	-0.760472	9.98e-29	7.19e-28	yes	down	57.0767	37.7267	52.51	59.78	58.94	38.15	39.16	35.87	hypothetical protein
MGG_07202	gene-MGG_07202	0.590989	-0.758796	8.89e-33	7.15e-32	yes	down	240.513	159.227	248.33	240.7	232.51	156.73	162.16	158.79	citrate synthase
MGG_13200	gene-MGG_13200	0.59105	-0.758647	1.53e-36	1.35e-35	yes	down	184.183	122.133	174.97	190.69	186.89	120.75	125.84	119.81	eukaryotic translation initiation factor 2 subunit alpha
MGG_01537	gene-MGG_01537	0.591306	-0.758023	2.78e-18	1.42e-17	yes	down	75.1567	44.6533	70.88	82.7	71.89	49.78	47.77	36.41	pyrABCN
MGG_01272	gene-MGG_01272	0.591323	-0.757982	1.54e-21	8.94e-21	yes	down	36.6767	24.27	35.98	36.2	37.85	24.29	24.12	24.4	CORD and CS domain-containing protein
MGG_03050	gene-MGG_03050	0.592134	-0.756004	3.35e-27	2.32e-26	yes	down	58.2867	38.7133	58.29	59.18	57.39	38.82	41.02	36.3	hypothetical protein
MGG_08318	gene-MGG_08318	0.592738	-0.754533	0.000235507	0.000526777	yes	down	7.32	4.89333	8.18	7.09	6.69	4.74	5.68	4.26	oxidoreductase ucpA
MGG_09007	gene-MGG_09007	0.593082	-0.753697	1.13e-36	9.96e-36	yes	down	418.18	271.74	421.39	416.56	416.59	285	264.05	266.17	hypothetical protein
MGG_00820	gene-MGG_00820	0.593261	-0.753261	3.37e-10	1.18e-09	yes	down	11.7133	7.80333	10.39	12.68	12.07	7.99	8.63	6.79	hypothetical protein
MGG_16493	gene-MGG_16493	0.593388	-0.752952	1.29e-18	6.69e-18	yes	down	267.473	177.08	246.21	287.43	268.78	161.53	182.71	187	hypothetical protein
MGG_03150	gene-MGG_03150	0.593819	-0.751906	2.21e-23	1.36e-22	yes	down	65.0433	43.24	59.98	68.36	66.79	43.56	46.3	39.86	cytosolic iron-sulfur protein assembly protein 1
MGG_08415	gene-MGG_08415	0.59404	-0.751368	2.67e-07	7.8e-07	yes	down	6.35667	4.22667	6.4	6.28	6.39	3.94	4.56	4.18	serin endopeptidase
MGG_04860	gene-MGG_04860	0.594077	-0.751277	1.72e-22	1.03e-21	yes	down	70.3867	46.8967	69.13	70.11	71.92	49.73	47.27	43.69	porphobilinogen deaminase
MGG_10716	gene-MGG_10716	0.594202	-0.750974	1.17e-20	6.53e-20	yes	down	122.383	81.51	119.96	117.66	129.53	77.92	87.64	78.97	hypothetical protein
MGG_13773	gene-MGG_13773	0.594248	-0.750864	3.35e-27	2.32e-26	yes	down	110.02	73.2267	113.81	109.73	106.52	72	74.2	73.48	indoleamine 2,3-dioxygenase subfamily
MGG_12589	gene-MGG_12589	0.594252	-0.750852	0.000955848	0.00198926	yes	down	3.27	2.17667	3.6	3.06	3.15	1.69	2.64	2.2	4-coumarate-CoA ligase 1
MGG_00879	gene-MGG_00879	0.594374	-0.750558	0.000138809	0.000317577	yes	down	4.55333	3.04333	4.09	5.23	4.34	3.96	2.68	2.49	DNA mismatch repair protein msh-2
MGG_10192	gene-MGG_10192	0.594476	-0.75031	3.66e-23	2.23e-22	yes	down	176.233	117.907	171.86	173.43	183.41	126.81	129.87	97.04	eukaryotic translation initiation factor 3 subunit A
MGG_09567	gene-MGG_09567	0.594605	-0.749997	1.49e-08	4.76e-08	yes	down	20.9467	13.9433	20.29	23.18	19.37	13.28	15.46	13.09	hypothetical protein
MGG_02712	gene-MGG_02712	0.594771	-0.749594	7.18e-07	2.02e-06	yes	down	9.88667	6.64	10.59	8.66	10.41	6.11	7.14	6.67	hypothetical protein
MGG_14561	gene-MGG_14561	0.594967	-0.749118	6.92e-43	6.99e-42	yes	down	250.463	166.923	238.55	261.67	251.17	170.67	171.11	158.99	regulatory protein Cys-3
MGG_05763	gene-MGG_05763	0.59505	-0.748917	0.0043027	0.00820069	yes	down	15.3	10.2767	17.75	12.95	15.2	12.62	9.45	8.76	stress responsive A/B barrel domain-containing protein
MGG_01569	gene-MGG_01569	0.595214	-0.748519	1.55e-08	4.93e-08	yes	down	17.5467	10.4433	17.79	18.19	16.66	10.03	11.36	9.94	minor allergen Alt a 7
MGG_07462	gene-MGG_07462	0.595263	-0.748401	2.04e-09	6.85e-09	yes	down	14.6233	9.74	14.32	15.71	13.84	9.68	9.99	9.55	dihydrodipicolinate synthase
MGG_02637	gene-MGG_02637	0.595309	-0.748289	2.1e-07	6.19e-07	yes	down	22.3267	14.8567	23.4	23.11	20.47	15.63	13.16	15.78	hypothetical protein
MGG_02337	gene-MGG_02337	0.59539	-0.748092	0.000831163	0.00174689	yes	down	7.64667	5.16	9.18	6.98	6.78	6.5	5.04	3.94	retinol dehydrogenase 8
MGG_03521	gene-MGG_03521	0.595743	-0.747238	5.41e-27	3.72e-26	yes	down	165.243	110.303	175.25	163.88	156.6	109.14	111.14	110.63	aconitate hydratase
MGG_04870	gene-MGG_04870	0.595768	-0.747178	1.03e-10	3.73e-10	yes	down	15.8667	11.2067	12.87	16.82	17.91	11.97	10.83	10.82	hypothetical protein
MGG_01742	gene-MGG_01742	0.595831	-0.747024	5.19e-32	4.07e-31	yes	down	593.73	397.737	609.31	581.41	590.47	417.67	427.87	347.67	elongation factor 2
MGG_01347	gene-MGG_01347	0.596007	-0.746598	6.56e-11	2.4e-10	yes	down	38.1433	25.42	37.54	35.67	41.22	24.26	25.42	26.58	4-carboxymuconolactone decarboxylase
MGG_10570	gene-MGG_10570	0.596018	-0.746572	1.49e-22	8.9e-22	yes	down	163.863	109.483	168.6	154.8	168.19	105.66	114.23	108.56	hypothetical protein
MGG_03581	gene-MGG_03581	0.596205	-0.746119	7.73e-07	2.16e-06	yes	down	6.92333	4.61	6.77	7.15	6.85	4.29	4.66	4.88	hypothetical protein
MGG_08079	gene-MGG_08079	0.59644	-0.745551	2.11e-08	6.67e-08	yes	down	35.09	23.4267	34.95	34.77	35.55	24.7	22.47	23.11	rRNA processing protein Rrp17
MGG_02842	gene-MGG_02842	0.59658	-0.745212	2.66e-24	1.68e-23	yes	down	82.0433	55	86.42	79.25	80.46	57.23	57.53	50.24	hsp70-like protein
MGG_06559	gene-MGG_06559	0.596947	-0.744325	1.37e-36	1.21e-35	yes	down	802.517	537.963	761.35	830.18	816.02	581.91	559.14	472.84	cytochrome b-245 heavychain subunit beta
MGG_00906	gene-MGG_00906	0.596983	-0.744237	0.00400648	0.00767192	yes	down	4.4	2.93333	4.66	4.01	4.53	2.54	2.9	3.36	hypothetical protein
MGG_01851	gene-MGG_01851	0.597007	-0.744179	6.32e-19	3.35e-18	yes	down	173.2	116.087	182.84	161.85	174.91	114.73	115.52	118.01	hypothetical protein
MGG_02518	gene-MGG_02518	0.598115	-0.741504	0.000109902	0.000254124	yes	down	4.19667	2.81667	3.59	3.74	5.26	3.14	2.79	2.52	ATP-dependent RNA helicase DHX8
MGG_05156	gene-MGG_05156	0.598118	-0.741498	1.58e-31	1.23e-30	yes	down	116.063	77.79	110.31	118.19	119.69	81.2	78.41	73.76	eukaryotic translation initiation factor 3 subunit H
MGG_09778	gene-MGG_09778	0.598447	-0.740704	0.00549924	0.0103328	yes	down	2.98	2.01	2.36	3.34	3.24	2.23	2.46	1.34	quinate permease
MGG_07966	gene-MGG_07966	0.598576	-0.740394	0.00310888	0.00605389	yes	down	2.75333	1.84	2.66	2.96	2.64	1.81	1.89	1.82	phosphate transporter
MGG_00322	gene-MGG_00322	0.598694	-0.740109	0.0049673	0.00939654	yes	down	3.03333	2.03	2.58	3.05	3.47	1.89	2.29	1.91	hypothetical protein
MGG_01231	gene-MGG_01231	0.598975	-0.739433	1.68e-05	4.2e-05	yes	down	25.3933	14.0933	26.52	22.44	27.22	15.77	12.95	13.56	sorbitol dehydrogenase
MGG_14513	gene-MGG_14513	0.599581	-0.737973	8.12e-06	2.1e-05	yes	down	12.0167	8.13	14.87	10.89	10.29	8.26	8.14	7.99	hypothetical protein
MGG_04845	gene-MGG_04845	0.599638	-0.737836	5.41e-10	1.88e-09	yes	down	162.22	108.953	169.08	158.22	159.36	92.02	106.84	128	phosphoribulokinase/uridine kinase
MGG_13782	gene-MGG_13782	0.599721	-0.737637	1.07e-36	9.48e-36	yes	down	1320.89	886.743	1319.35	1323.68	1319.65	862.66	901.55	896.02	60S ribosomal protein L19
MGG_07179	gene-MGG_07179	0.599792	-0.737466	2.92e-22	1.73e-21	yes	down	37.4	23.9233	35.64	35.9	40.66	24.94	25.27	21.56	rhizopuspepsin-3
MGG_09418	gene-MGG_09418	0.599838	-0.737356	3.52e-10	1.24e-09	yes	down	24.9233	16.7867	27.65	24.81	22.31	16.75	17.48	16.13	hypothetical protein
MGG_01689	gene-MGG_01689	0.600288	-0.736272	2.42e-31	1.88e-30	yes	down	219.957	148.663	203.98	223.68	232.21	148.85	154.69	142.45	rho GDP dissociation inhibitor
MGG_05939	gene-MGG_05939	0.600399	-0.736007	0.00216762	0.00430282	yes	down	3.11333	2.09333	3.18	3.05	3.11	2.28	1.8	2.2	hypothetical protein
MGG_01326	gene-MGG_01326	0.600428	-0.735936	1.96e-24	1.25e-23	yes	down	57.5833	38.7967	55.09	57.6	60.06	42.62	39.77	34	NIMA-interacting protein TinC
MGG_01719	gene-MGG_01719	0.600574	-0.735587	2.12e-29	1.56e-28	yes	down	187.953	126.303	181.62	191.01	191.23	126.91	125.04	126.96	electron transfer flavoprotein subunit alpha
MGG_14801	gene-MGG_14801	0.600627	-0.73546	4.92e-24	3.1e-23	yes	down	47.06	31.64	45.35	47.5	48.33	31.57	31.9	31.45	IdgA domain-containing protein
MGG_06035	gene-MGG_06035	0.600642	-0.735424	1.22e-31	9.51e-31	yes	down	1127.4	759.033	1076.77	1113.85	1191.58	732.23	817.87	727	FK506-binding protein 1B
MGG_12177	gene-MGG_12177	0.600869	-0.734877	2.98e-07	8.66e-07	yes	down	10.4467	7.08333	11.53	9.77	10.04	7.58	7.66	6.01	translation initiation factor eIF-2B subunit family protein
MGG_04758	gene-MGG_04758	0.601062	-0.734414	6.44e-33	5.2e-32	yes	down	99.4833	67.7367	98.65	100.81	98.99	70.52	72.28	60.41	hypothetical protein, variant
MGG_06240	gene-MGG_06240	0.601173	-0.734148	0.0131988	0.0234909	yes	down	2.38333	1.60333	1.67	2.23	3.25	1.51	1.88	1.42	pantothenate transporter liz1
MGG_05457	gene-MGG_05457	0.601326	-0.733781	1.1e-11	4.19e-11	yes	down	10.2233	6.50667	9.45	10.46	10.76	6.46	5.97	7.09	hypothetical protein
MGG_04477	gene-MGG_04477	0.601361	-0.733698	4.68e-11	1.73e-10	yes	down	11.3967	7.7	9.82	12.48	11.89	8.24	8.52	6.34	DNA-directed RNA polymerase III subunit RPC1
MGG_09820	gene-MGG_09820	0.601446	-0.733493	0.000109519	0.00025335	yes	down	5.75333	3.83	6.46	4.54	6.26	4.26	3.91	3.32	hypothetical protein
MGG_01917	gene-MGG_01917	0.60171	-0.732859	0.00210795	0.00418829	yes	down	13.37	8.96	13.63	13.61	12.87	8.37	8.13	10.38	DNA replication complex GINS protein PSF2
MGG_17777	gene-MGG_17777	0.601768	-0.73272	7.11e-05	0.000167444	yes	down	45.7433	30.6	39.69	51.91	45.63	32.06	29.65	30.09	hypothetical protein
MGG_06112	gene-MGG_06112	0.601791	-0.732664	0.000238623	0.00053341	yes	down	5.09333	3.40667	4.93	4.96	5.39	2.99	3.31	3.92	hydrolase
MGG_00597	gene-MGG_00597	0.602488	-0.730995	3.6e-15	1.62e-14	yes	down	21.8467	14.79	21.09	22.92	21.53	14.85	16.84	12.68	Hsk1-interacting molecule 1
MGG_15769	gene-MGG_15769	0.602511	-0.730941	2.67e-25	1.75e-24	yes	down	145.383	97.25	145.13	141.84	149.18	91.6	101.22	98.93	hypothetical protein
MGG_03201	gene-MGG_03201	0.603043	-0.729668	3.54e-22	2.09e-21	yes	down	90.6867	101.657	86.35	103.71	82	97.18	93.43	114.36	acetyl-coenzyme A synthetase
MGG_00540	gene-MGG_00540	0.603096	-0.729541	8.89e-18	4.47e-17	yes	down	46.35	31.24	45.72	46.71	46.62	30.47	30.52	32.73	hypothetical protein
MGG_01428	gene-MGG_01428	0.603428	-0.728748	4.43e-12	1.73e-11	yes	down	23.1567	15.6367	22.04	23.61	23.82	16.39	14.94	15.58	hypothetical protein
MGG_15072	gene-MGG_15072	0.603988	-0.727409	9.18e-33	7.37e-32	yes	down	78.35	53.0833	76.69	80.79	77.57	55.99	54.21	49.05	importin subunit alpha-1
MGG_17323	gene-MGG_17323	0.604329	-0.726593	0.000691523	0.00146881	yes	down	8.68333	5.88	8.95	9.24	7.86	5	6.91	5.73	hypothetical protein
MGG_17465	gene-MGG_17465	0.604458	-0.726286	0.00299565	0.00584917	yes	down	7.14333	4.77	4.45	7.35	9.63	4.08	4.75	5.48	hypothetical protein
MGG_08587	gene-MGG_08587	0.604636	-0.72586	0.000887147	0.00185464	yes	down	4.04667	2.74	3.96	5.16	3.02	3.19	2.42	2.61	hypothetical protein
MGG_00539	gene-MGG_00539	0.604812	-0.725442	2.47e-38	2.26e-37	yes	down	1391.7	945.027	1420.71	1369.81	1384.59	950.67	983.8	900.61	hypothetical protein
MGG_00256	gene-MGG_00256	0.604883	-0.725271	4.81e-22	2.83e-21	yes	down	204.803	138.657	212.88	196	205.53	136.08	135.11	144.78	cytosolic non-specific dipeptidase
MGG_10634	gene-MGG_10634	0.605579	-0.723613	2.46e-12	9.72e-12	yes	down	18.5867	12.6533	20.08	18.63	17.05	12.89	13.41	11.66	chromate ion transporter
MGG_12102	gene-MGG_12102	0.606049	-0.722494	0.0191006	0.033081	yes	down	3.19667	2.15333	2.82	3.7	3.07	1.83	2.18	2.45	tRNA wybutosine-synthesizing protein 2
MGG_15621	gene-MGG_15621	0.606166	-0.722215	5e-09	1.63e-08	yes	down	22.0767	16.63	25.51	19.07	21.65	14.89	17.3	17.7	hypothetical protein
MGG_06915	gene-MGG_06915	0.606366	-0.721738	4.91e-28	3.5e-27	yes	down	243.52	165.17	236.15	246.13	248.28	164.65	163.23	167.63	uracil phosphoribosyltransferase
MGG_03163	gene-MGG_03163	0.606911	-0.720444	2.72e-17	1.34e-16	yes	down	91.51	62.11	87.8	94.7	92.03	63.48	60.87	61.98	hypothetical protein
MGG_06403	gene-MGG_06403	0.606957	-0.720334	7.94e-33	6.4e-32	yes	down	106.677	72.5533	102.55	107.82	109.66	73.13	75.24	69.29	hypothetical protein
MGG_17612	gene-MGG_17612	0.606957	-0.720334	0.000440164	0.000954392	yes	down	19.88	13.4233	19.76	18.01	21.87	15.27	10.57	14.43	hypothetical protein
MGG_02417	gene-MGG_02417	0.606983	-0.720273	4.31e-10	1.51e-09	yes	down	18.2267	12.4467	18.46	18.8	17.42	12.33	14.56	10.45	ATP-dependent rRNA helicase spb-4
MGG_09838	gene-MGG_09838	0.606996	-0.720242	4.4e-15	1.97e-14	yes	down	16.37	11.1533	16.14	17.62	15.35	11.68	11.6	10.18	sulfate transporter 4.1
MGG_03446	gene-MGG_03446	0.607113	-0.719962	5.56e-42	5.51e-41	yes	down	205.433	139.807	201.93	205.07	209.3	141.51	146.45	131.46	hypothetical protein
MGG_02378	gene-MGG_02378	0.607116	-0.719956	6.71e-31	5.15e-30	yes	down	442.097	300.323	423.18	440.14	462.97	294.13	300.98	305.86	glutamate decarboxylase
MGG_01419	gene-MGG_01419	0.60722	-0.719708	4.64e-08	1.43e-07	yes	down	4.70333	3.20333	4.81	4.92	4.38	3.26	3.22	3.13	small nuclear ribonucleoprotein U1a
MGG_04018	gene-MGG_04018	0.607349	-0.719403	4.08e-06	1.08e-05	yes	down	7.75	5.25333	7.52	7.06	8.67	4.98	5.63	5.15	mitochondrial chaperone BCS1
MGG_01349	gene-MGG_01349	0.607432	-0.719205	2.33e-16	1.1e-15	yes	down	75.5033	46.5933	78.11	74.67	73.73	42.52	51.41	45.85	hypothetical protein
MGG_17452	gene-MGG_17452	0.60793	-0.718023	2.47e-09	8.24e-09	yes	down	8.43333	5.66667	7.24	8.88	9.18	5.78	6.4	4.82	hypothetical protein
MGG_16179	gene-MGG_16179	0.60804	-0.717761	9.65e-06	2.48e-05	yes	down	20.2467	13.4167	19.16	22.13	19.45	12.15	12.61	15.49	hypothetical protein
MGG_11809	gene-MGG_11809	0.608278	-0.717198	0.000735682	0.00155762	yes	down	3.36667	2.29	3.16	4.26	2.68	2.72	2.07	2.08	hypothetical protein
MGG_16371	gene-MGG_16371	0.60828	-0.717194	1.41e-14	6.15e-14	yes	down	33.86	27.57	34.95	31.65	34.98	26.67	25.03	31.01	hypothetical protein
MGG_06638	gene-MGG_06638	0.608591	-0.716456	1.1e-25	7.27e-25	yes	down	237.47	162.273	239.11	231.79	241.51	172.03	175.69	139.1	hypothetical protein
MGG_05466	gene-MGG_05466	0.609064	-0.715335	0.00571381	0.0107171	yes	down	1.92	1.32	2.23	1.96	1.57	1.55	1.22	1.19	hypothetical protein
MGG_06189	gene-MGG_06189	0.609076	-0.715305	3.26e-43	3.32e-42	yes	down	1241.53	848.197	1244.53	1224.22	1255.83	873.6	870.98	800.01	hypothetical protein
MGG_10526	gene-MGG_10526	0.60914	-0.715154	5.23e-10	1.82e-09	yes	down	10.2767	7.05333	9.56	10.07	11.2	8.29	7.32	5.55	hypothetical protein
MGG_03737	gene-MGG_03737	0.609323	-0.71472	5.31e-16	2.47e-15	yes	down	27.3233	18.6667	25	28.96	28.01	18.28	21.03	16.69	hypothetical protein
MGG_00842	gene-MGG_00842	0.610063	-0.71297	0.000178058	0.000402431	yes	down	14.3733	9.76667	12.89	13.63	16.6	8.96	9.6	10.74	hypothetical protein
MGG_16815	gene-MGG_16815	0.610226	-0.712585	3.64e-32	2.86e-31	yes	down	218.147	150.153	220.72	215.03	218.69	150.02	152.61	147.83	hypothetical protein
MGG_00904	gene-MGG_00904	0.610507	-0.71192	8.33e-16	3.84e-15	yes	down	55.9367	38.22	50.66	58.99	58.16	37.17	41.41	36.08	prefoldin subunit 3
MGG_01838	gene-MGG_01838	0.610581	-0.711746	0.000140743	0.000321719	yes	down	5.43	3.70667	4.85	5.82	5.62	3.53	4.08	3.51	hypothetical protein
MGG_01045	gene-MGG_01045	0.611073	-0.710584	1.41e-39	1.33e-38	yes	down	381.357	261.04	382.86	386.19	375.02	263.39	261.93	257.8	arrestin domain-containing protein
MGG_07347	gene-MGG_07347	0.611142	-0.71042	7.62e-07	2.13e-06	yes	down	8.22667	5.6	7.05	8.28	9.35	6.23	5.94	4.63	hypothetical protein
MGG_08765	gene-MGG_08765	0.6113	-0.710048	1.66e-15	7.53e-15	yes	down	29.46	19.89	27.06	31.66	29.66	22.05	21.18	16.44	hypothetical protein
MGG_12996	gene-MGG_12996	0.611365	-0.709895	5.12e-20	2.81e-19	yes	down	62.4833	42.7567	62.23	62.43	62.79	43.28	41.76	43.23	glutamate-5-semialdehyde dehydrogenase
MGG_13188	gene-MGG_13188	0.611498	-0.70958	9.56e-28	6.76e-27	yes	down	219.267	149.57	204.32	224.82	228.66	143.66	157.32	147.73	voltage-gated potassium channel subunit beta-2
MGG_02158	gene-MGG_02158	0.6119	-0.708632	2.92e-35	2.48e-34	yes	down	92.6867	63.5833	90.41	95.05	92.6	68.15	62.79	59.81	plasma membrane iron permease
MGG_16386	gene-MGG_16386	0.612082	-0.708204	5.87e-13	2.4e-12	yes	down	99.7433	68.35	96.62	95.43	107.18	68.02	65.9	71.13	hypothetical protein
MGG_03107	gene-MGG_03107	0.612941	-0.706181	8.98e-13	3.63e-12	yes	down	59.59	40.98	67.33	54.25	57.19	40.72	40.61	41.61	solute carrier family 35 member F1
MGG_00687	gene-MGG_00687	0.613041	-0.705945	7.73e-16	3.58e-15	yes	down	30.67	21.06	28.97	31.15	31.89	20.29	22.96	19.93	hypothetical protein
MGG_04134	gene-MGG_04134	0.613312	-0.705308	4.66e-12	1.81e-11	yes	down	30.3967	20.7	30.27	29.96	30.96	20.45	19.62	22.03	aminotransferase
MGG_01752	gene-MGG_01752	0.613416	-0.705063	2.02e-25	1.33e-24	yes	down	84.8367	58.2233	81.19	86.95	86.37	58.59	58.04	58.04	hypothetical protein
MGG_09898	gene-MGG_09898	0.613565	-0.704712	8.17e-07	2.28e-06	yes	down	3.49667	2.38667	2.93	4	3.56	2.67	2.59	1.9	adenylate cyclase
MGG_03406	gene-MGG_03406	0.613794	-0.704174	7.76e-19	4.09e-18	yes	down	35.73	17.9267	30.5	48.76	27.93	18.15	17.5	18.13	iron-sulfur clusters transporter ATM1
MGG_02872	gene-MGG_02872	0.613913	-0.703894	1.25e-24	7.97e-24	yes	down	873.357	601.167	921.15	842.56	856.36	575.67	631.7	596.13	40S ribosomal protein S27
MGG_04909	gene-MGG_04909	0.613991	-0.70371	1.92e-07	5.67e-07	yes	down	16.6633	11.4833	16.12	15.47	18.4	11.12	12.6	10.73	mitochondrial import protein mmp37
MGG_14472	gene-MGG_14472	0.61434	-0.70289	2.66e-18	1.36e-17	yes	down	65.88	45.37	63.69	64.03	69.92	45.8	47.58	42.73	S-methyl-5-thioribose-1-phosphate isomerase
MGG_08965	gene-MGG_08965	0.614394	-0.702764	0.0294507	0.0495889	yes	down	2.88667	1.94333	2.5	2.55	3.61	1.25	1.97	2.61	hypothetical protein
MGG_04398	gene-MGG_04398	0.614543	-0.702415	1.21e-07	3.63e-07	yes	down	15.4533	10.66	15.05	16.65	14.66	10.36	11.79	9.83	6-phosphogluconate dehydrogenase
MGG_15019	gene-MGG_15019	0.614788	-0.701839	3.79e-14	1.63e-13	yes	down	19.9933	13.68	20.18	20	19.8	14.3	14.33	12.41	peroxisomal copper amine oxidase
MGG_01985	gene-MGG_01985	0.614933	-0.7015	7.39e-39	6.85e-38	yes	down	255.707	176.18	247.53	258.63	260.96	181.41	177.27	169.86	Delta(12) fatty acid desaturase
MGG_01744	gene-MGG_01744	0.615244	-0.700768	3.03e-22	1.79e-21	yes	down	353.213	242.753	337.95	359.43	362.26	235.57	236.77	255.92	electron transfer flavoprotein subunit beta
MGG_10652	gene-MGG_10652	0.615546	-0.70006	3.98e-14	1.71e-13	yes	down	23.9467	16.5333	22.16	25.53	24.15	17.49	17.34	14.77	digestive organ expansion factor
MGG_04145	gene-MGG_04145	0.616161	-0.69862	6.95e-10	2.39e-09	yes	down	8.67667	5.99333	7.84	9.16	9.03	6.37	6.2	5.41	chitin synthase 2
MGG_13079	gene-MGG_13079	0.616261	-0.698386	0.0214767	0.0368996	yes	down	1.69333	1.17333	1.77	1.83	1.48	1.06	1.42	1.04	Ser/Thr protein phosphatase
MGG_00041	gene-MGG_00041	0.616275	-0.698355	3.12e-17	1.53e-16	yes	down	70.5533	48.6533	66.56	73.65	71.45	50.68	47.81	47.47	O-methyltransferase
MGG_05146	gene-MGG_05146	0.616319	-0.69825	1.42e-07	4.26e-07	yes	down	26.6833	24.05	21.21	32.67	26.17	20.96	28.53	22.66	ribosomal RNA-processing protein 1
MGG_10653	gene-MGG_10653	0.616497	-0.697835	2.11e-18	1.09e-17	yes	down	90.8767	62.7	91.49	86.56	94.58	61.99	61.02	65.09	eukaryotic translation initiation factor 3 subunit F
MGG_15670	gene-MGG_15670	0.616596	-0.697603	2.53e-10	8.97e-10	yes	down	18.58	12.7833	18.36	19.92	17.46	12.49	12.03	13.83	hypothetical protein
MGG_04898	gene-MGG_04898	0.616782	-0.697168	1.52e-19	8.21e-19	yes	down	179.703	119.96	167.36	181.3	190.45	129.55	122.36	107.97	hypothetical protein
MGG_03582	gene-MGG_03582	0.61709	-0.696447	1.06e-18	5.53e-18	yes	down	35.8067	25.6367	34.9	37.7	34.82	25.89	27.19	23.83	RING-14 protein
MGG_09265	gene-MGG_09265	0.617454	-0.695597	7.03e-10	2.42e-09	yes	down	18.9667	13.1733	18.29	19.25	19.36	13.41	15.1	11.01	hypothetical protein
MGG_04400	gene-MGG_04400	0.617672	-0.695087	1.12e-25	7.4e-25	yes	down	322.933	224.02	302.72	331.37	334.71	239.97	238.77	193.32	ATP-dependent RNA helicase eIF4A
MGG_03324	gene-MGG_03324	0.617719	-0.694976	4.59e-29	3.34e-28	yes	down	148.287	100.907	146.63	147.66	150.57	96.73	108.46	97.53	hypothetical protein
MGG_02471	gene-MGG_02471	0.618547	-0.693045	2.51e-36	2.19e-35	yes	down	191.34	132.703	190.07	193.84	190.11	137.56	134.73	125.82	transketolase
MGG_05934	gene-MGG_05934	0.618662	-0.692776	4.02e-19	2.15e-18	yes	down	41.1333	28.46	39.31	44.6	39.49	28.46	28.75	28.17	hypothetical protein
MGG_17822	gene-MGG_17822	0.618843	-0.692355	0.00304736	0.00594358	yes	down	5.36667	3.73	4.96	4.2	6.94	4.19	3.24	3.76	hypothetical protein
MGG_03209	gene-MGG_03209	0.619085	-0.691791	5.29e-06	1.39e-05	yes	down	11.62	8.16333	12.83	12.06	9.97	9.5	6.9	8.09	hypothetical protein
MGG_00129	gene-MGG_00129	0.619149	-0.691641	4.55e-12	1.77e-11	yes	down	29.27	20.2633	28.01	31.11	28.69	19.94	20.98	19.87	hypothetical protein
MGG_12243	gene-MGG_12243	0.619349	-0.691177	6.49e-06	1.69e-05	yes	down	7.36333	5.12667	6.88	8.15	7.06	5.2	6.01	4.17	hypothetical protein
MGG_15034	gene-MGG_15034	0.619584	-0.690629	3.52e-10	1.24e-09	yes	down	56.28	39.23	60.12	54.27	54.45	41.8	39.22	36.67	ADP-ribose pyrophosphatase
MGG_06683	gene-MGG_06683	0.619589	-0.690617	3.93e-10	1.38e-09	yes	down	25.8067	17.8433	24.87	25.38	27.17	17.54	16.76	19.23	hypothetical protein
MGG_06626	gene-MGG_06626	0.619651	-0.690472	4.3e-17	2.1e-16	yes	down	79.86	55.3133	74.04	82.32	83.22	59.3	50.68	55.96	hypothetical protein
MGG_05570	gene-MGG_05570	0.620066	-0.689507	6.28e-05	0.000148917	yes	down	17.9567	12.2967	15.71	18.01	20.15	12.51	11.95	12.43	hypothetical protein
MGG_06249	gene-MGG_06249	0.62012	-0.689381	2.45e-29	1.8e-28	yes	down	1169.54	807.803	1122.23	1170.11	1216.27	812.62	793.37	817.42	translationally controlled tumor protein
MGG_03026	gene-MGG_03026	0.620157	-0.689294	6.97e-08	2.13e-07	yes	down	8.72667	6.07667	8.93	8.08	9.17	6.37	6.11	5.75	NEK protein kinase
MGG_04934	gene-MGG_04934	0.620502	-0.688493	0.000257076	0.000572131	yes	down	3.23	2.24333	2.68	3.52	3.49	2.37	2.28	2.08	peptide transporter PTR2-A
MGG_16116	gene-MGG_16116	0.620753	-0.687908	0.000192569	0.000433565	yes	down	2.54667	1.77667	2.41	2.83	2.4	1.79	2.12	1.42	hypothetical protein
MGG_17746	gene-MGG_17746	0.620758	-0.687897	0.000433215	0.000940671	yes	down	4.56333	3.18333	4.77	5	3.92	2.69	4.19	2.67	hypothetical protein
MGG_17079	gene-MGG_17079	0.621014	-0.687301	7.11e-09	2.3e-08	yes	down	16.3733	12.72	14.41	17.31	17.4	13.58	13.03	11.55	formamidase
MGG_15079	gene-MGG_15079	0.621755	-0.685581	6.62e-07	1.86e-06	yes	down	4.83333	3.37333	4.69	5.25	4.56	3.63	3.45	3.04	hypothetical protein
MGG_02243	gene-MGG_02243	0.62184	-0.685384	3.52e-08	1.09e-07	yes	down	10.7633	7.49333	10.96	11.6	9.73	7.68	7.36	7.44	amidohydrolase
MGG_05662	gene-MGG_05662	0.622363	-0.684172	5.76e-12	2.23e-11	yes	down	40.2133	28.07	41.87	37.65	41.12	28.82	27.68	27.71	shwachman-Bodian-Diamond syndrome protein
MGG_01725	gene-MGG_01725	0.622363	-0.684171	1.94e-07	5.73e-07	yes	down	22.16	15.37	18.39	24.35	23.74	13.33	17.11	15.67	deoxyhypusine hydroxylase
MGG_06124	gene-MGG_06124	0.622573	-0.683685	2.65e-09	8.82e-09	yes	down	10.1467	7.09667	8.46	11.34	10.64	7.42	8.14	5.73	activating signal cointegrator 1 complex subunit 3
MGG_04396	gene-MGG_04396	0.622828	-0.683094	1.79e-33	1.47e-32	yes	down	206.79	144.4	191.48	215.31	213.58	150.67	149.64	132.89	valyl-tRNA synthetase
MGG_13743	gene-MGG_13743	0.622993	-0.682711	1.41e-27	9.95e-27	yes	down	254.34	177.25	242.13	263.48	257.41	177.94	177.6	176.21	hypothetical protein
MGG_06028	gene-MGG_06028	0.623217	-0.682193	4.34e-07	1.24e-06	yes	down	11.5067	8.02667	10.66	12.27	11.59	8.56	7.9	7.62	hypothetical protein
MGG_08832	gene-MGG_08832	0.623392	-0.681788	0.00124012	0.00254249	yes	down	363.027	253.743	450.21	319.54	319.33	228.77	275.23	257.23	C-5 sterol desaturase
MGG_08899	gene-MGG_08899	0.623457	-0.681638	6.7e-05	0.000158385	yes	down	22.13	15.41	21.13	22.65	22.61	14.02	15.93	16.28	hypothetical protein
MGG_05929	gene-MGG_05929	0.623533	-0.681461	6.14e-13	2.51e-12	yes	down	23.1733	16.1533	23.29	23.35	22.88	15.13	16.63	16.7	hexose transporter
MGG_05660	gene-MGG_05660	0.623578	-0.681358	4.11e-10	1.44e-09	yes	down	34.68	24.1333	34.27	33.3	36.47	23.85	23.05	25.5	uridine nucleosidase
MGG_14886	gene-MGG_14886	0.623761	-0.680934	8.44e-13	3.42e-12	yes	down	27.5933	19.32	28.35	29.08	25.35	19.79	20.33	17.84	sphingolipid C9-methyltransferase
MGG_09755	gene-MGG_09755	0.623921	-0.680564	1.03e-18	5.41e-18	yes	down	56.0133	39.32	54.95	56.96	56.13	41.97	43.44	32.55	hypothetical protein
MGG_03487	gene-MGG_03487	0.623967	-0.680459	1.41e-10	5.07e-10	yes	down	10.6167	7.45	9.86	11.07	10.92	8.23	7.87	6.25	condensin complex subunit 1
MGG_13203	gene-MGG_13203	0.624022	-0.680332	1.24e-07	3.74e-07	yes	down	9.41	6.59667	9.34	10.26	8.63	6.88	7.12	5.79	ATPase
MGG_11475	gene-MGG_11475	0.624055	-0.680255	1.42e-07	4.26e-07	yes	down	8.77667	6.16	7.84	9.02	9.47	7.39	6.01	5.08	hypothetical protein
MGG_07878	gene-MGG_07878	0.624198	-0.679924	0.00325879	0.00632574	yes	down	3.19333	2.24333	3.2	2.58	3.8	2.55	2.09	2.09	thiamine transporter
MGG_17631	gene-MGG_17631	0.624406	-0.679444	8.57e-05	0.000200375	yes	down	3.50667	2.46	2.94	2.93	4.65	2.89	2.69	1.8	hypothetical protein
MGG_02441	gene-MGG_02441	0.624424	-0.679402	1.23e-32	9.87e-32	yes	down	193.347	135.467	192.6	195.5	191.94	134.61	139.06	132.73	ornithine decarboxylase
MGG_03441	gene-MGG_03441	0.624699	-0.678766	4.14e-26	2.78e-25	yes	down	85.9033	60.2633	81.49	87	89.22	64.43	63.09	53.27	trehalose-phosphatase
MGG_00964	gene-MGG_00964	0.624952	-0.678183	2.86e-06	7.72e-06	yes	down	15.6067	10.9267	16.03	17.47	13.32	11.67	10.46	10.65	hypothetical protein
MGG_06662	gene-MGG_06662	0.624954	-0.678178	1.93e-08	6.11e-08	yes	down	5.31667	3.54333	4.82	5.71	5.42	3.72	3.93	2.98	FAD binding domain-containing protein
MGG_03136	gene-MGG_03136	0.62524	-0.677517	1.45e-37	1.31e-36	yes	down	502.873	355.643	499.01	504.79	504.82	347.78	380.29	338.86	60S ribosomal protein L10
MGG_04831	gene-MGG_04831	0.625273	-0.677441	5.52e-11	2.03e-10	yes	down	13.74	9.67	13.92	14.47	12.83	10.27	10.69	8.05	hypothetical protein
MGG_03894	gene-MGG_03894	0.62551	-0.676894	8.03e-11	2.93e-10	yes	down	20.5767	14.3833	18.88	20.19	22.66	16	13.48	13.67	protein arginine N-methyltransferase
MGG_02224	gene-MGG_02224	0.62559	-0.67671	4.19e-12	1.64e-11	yes	down	51.0233	36.0767	51.93	46.56	54.58	35.55	38.56	34.12	hypothetical protein
MGG_01046	gene-MGG_01046	0.625647	-0.676579	4.26e-25	2.76e-24	yes	down	91.7333	64.22	87.46	95	92.74	66.3	62.48	63.88	methionyl-tRNA synthetase
MGG_00392	gene-MGG_00392	0.62566	-0.676549	7.57e-19	3.99e-18	yes	down	62.0167	44.16	59.73	61.98	64.34	46.23	43.12	43.13	hypothetical protein
MGG_10447	gene-MGG_10447	0.625816	-0.676189	2.23e-33	1.82e-32	yes	down	3820.2	2673.59	3852.06	3802.44	3806.11	2651.76	2704.08	2664.92	peptidyl-prolyl cis-trans isomerase
MGG_06162	gene-MGG_06162	0.625875	-0.676054	0.000246467	0.000550018	yes	down	2.93667	2.08333	3.37	2.8	2.64	2.16	2.63	1.46	DNA topoisomerase 2
MGG_09761	gene-MGG_09761	0.626178	-0.675355	2.31e-39	2.18e-38	yes	down	5721.3	4013.99	5753.04	5730.28	5680.58	4028.22	4101.39	3912.36	hypothetical protein
MGG_07065	gene-MGG_07065	0.626463	-0.674699	3.66e-06	9.74e-06	yes	down	5.86667	4.11	5.45	6.47	5.68	4.49	3.74	4.1	G2/mitotic-specific cyclin-B
MGG_18021	gene-MGG_18021	0.626753	-0.674031	1.83e-10	6.53e-10	yes	down	134.32	92.8833	141.35	134.05	127.56	77.64	98.29	102.72	hypothetical protein
MGG_15886	gene-MGG_15886	0.626784	-0.673959	3.75e-14	1.61e-13	yes	down	57.9067	40.16	56	57.2	60.52	42.5	37.18	40.8	hypothetical protein
MGG_07717	gene-MGG_07717	0.626859	-0.673787	1.27e-21	7.39e-21	yes	down	82.4633	57.9267	84.4	81.9	81.09	57.02	59.66	57.1	hypothetical protein
MGG_06540	gene-MGG_06540	0.627017	-0.673423	0.000169394	0.000383736	yes	down	15.4733	10.7933	15.45	14.63	16.34	10.13	9.15	13.1	tryptophan dimethylallyltransferase 2
MGG_03147	gene-MGG_03147	0.627109	-0.673212	7.39e-24	4.64e-23	yes	down	98.2433	68.93	93.23	101.31	100.19	72.58	65.02	69.19	glycerol-3-phosphate dehydrogenase
MGG_02510	gene-MGG_02510	0.627224	-0.672947	8.87e-13	3.59e-12	yes	down	28.2033	21.0233	32.44	24.7	27.47	19.79	21.83	21.45	coiled-coil domain-containing protein 25
MGG_11676	gene-MGG_11676	0.627263	-0.672858	2.01e-07	5.93e-07	yes	down	7.22333	5.07667	7.12	7.03	7.52	5.41	5.49	4.33	choline dehydrogenase
MGG_04358	gene-MGG_04358	0.627693	-0.671868	1.36e-14	5.94e-14	yes	down	76.7767	53.8233	75.85	78.23	76.25	50.09	53.8	57.58	hypothetical protein
MGG_07131	gene-MGG_07131	0.627866	-0.671472	2.13e-06	5.8e-06	yes	down	5.46667	3.83667	5.34	5.8	5.26	4.1	3.34	4.07	hypothetical protein
MGG_06078	gene-MGG_06078	0.627913	-0.671363	2.25e-10	8.01e-10	yes	down	17.83	12.56	18.68	17.57	17.24	12.55	12.89	12.24	adaptin ear-binding coat-associated protein 2
MGG_17778	gene-MGG_17778	0.628055	-0.671038	5.44e-10	1.89e-09	yes	down	72.9767	51.19	74.38	73.3	71.25	44.95	52.4	56.22	hypothetical protein
MGG_15480	gene-MGG_15480	0.628277	-0.670528	7.57e-07	2.12e-06	yes	down	13.1767	9.24	11.89	14.31	13.33	9.71	8.69	9.32	hypothetical protein
MGG_06780	gene-MGG_06780	0.6288	-0.669327	2.22e-05	5.5e-05	yes	down	7.94	5.58333	7.55	7.43	8.84	6.2	4.86	5.69	alpha-L-fucosidase 1
MGG_11749	gene-MGG_11749	0.628887	-0.669126	1.96e-05	4.88e-05	yes	down	10.4867	6.09667	10.89	11.73	8.84	6.49	6.19	5.61	hypothetical protein
MGG_07261	gene-MGG_07261	0.628961	-0.668958	1.25e-13	5.25e-13	yes	down	25.4467	17.96	24.48	25.36	26.5	19.38	17.93	16.57	2-nitropropane dioxygenase
MGG_06729	gene-MGG_06729	0.628996	-0.668878	7.47e-13	3.03e-12	yes	down	21.0367	14.7167	20	21.09	22.02	14.51	15.37	14.27	hypothetical protein
MGG_04566	gene-MGG_04566	0.629043	-0.668769	3.8e-09	1.25e-08	yes	down	37.6867	26.6067	36.01	38.59	38.46	29.64	26.49	23.69	RWD domain-containing protein
MGG_04586	gene-MGG_04586	0.629064	-0.66872	4.88e-17	2.37e-16	yes	down	179.53	126.313	177.37	175.05	186.17	126	121.96	130.98	riboflavin synthase
MGG_08187	gene-MGG_08187	0.629088	-0.668666	2.85e-11	1.07e-10	yes	down	37.59	26.48	34.01	39.85	38.91	27.68	27.31	24.45	thiol-specific monooxygenase
MGG_05330	gene-MGG_05330	0.629212	-0.668382	5.66e-07	1.6e-06	yes	down	40.12	28.28	39.69	39.25	41.42	31.26	29.45	24.13	nodulation protein L
MGG_04005	gene-MGG_04005	0.629322	-0.668129	2e-13	8.31e-13	yes	down	66.7533	46.9633	61.68	73.54	65.04	46	49.28	45.61	nuclear protein SNF4
MGG_10879	gene-MGG_10879	0.629866	-0.666883	2.14e-21	1.23e-20	yes	down	40.2467	28.3767	38.44	42.32	39.98	27.34	30.17	27.62	bifunctional P-450:NADPH-P450 reductase
MGG_16298	gene-MGG_16298	0.630035	-0.666495	2.03e-38	1.86e-37	yes	down	2012.52	1415.22	1921.29	2043.86	2072.41	1414.73	1447.75	1383.18	hypothetical protein
MGG_05061	gene-MGG_05061	0.630286	-0.665921	1.04e-13	4.39e-13	yes	down	25.6767	20.9633	24.97	28.3	23.76	23.2	21.46	18.23	hypothetical protein
MGG_04540	gene-MGG_04540	0.630296	-0.665899	1.81e-18	9.35e-18	yes	down	71.2567	50.2967	70.67	70.76	72.34	48.7	52.44	49.75	inosine-uridine preferring nucleoside hydrolase
MGG_04506	gene-MGG_04506	0.630462	-0.665518	6.21e-25	4e-24	yes	down	164.307	116.107	157.49	169.15	166.28	117.37	123.28	107.67	26S proteasome non-ATPase regulatory subunit 4
MGG_04505	gene-MGG_04505	0.630715	-0.66494	0.000125839	0.0002894	yes	down	8.39333	5.91333	8.13	8.45	8.6	4.58	6.9	6.26	hypothetical protein
MGG_00660	gene-MGG_00660	0.630807	-0.66473	1.94e-07	5.73e-07	yes	down	6.42	4.49333	5.62	7.14	6.5	4.65	4.36	4.47	hypothetical protein
MGG_01509	gene-MGG_01509	0.630852	-0.664627	9.45e-10	3.23e-09	yes	down	93.4633	60.2433	95.29	82.06	103.04	56.48	67.76	56.49	glycine rich protein
MGG_13771	gene-MGG_13771	0.630973	-0.66435	0.00140182	0.00285528	yes	down	3.04333	2.14667	2.88	2.57	3.68	2.14	2.09	2.21	hypothetical protein
MGG_04058	gene-MGG_04058	0.63118	-0.663877	2.01e-05	4.99e-05	yes	down	11.4	8.05667	11.58	11.05	11.57	8.47	7.5	8.2	hypothetical protein
MGG_17538	gene-MGG_17538	0.631228	-0.663767	1.69e-11	6.39e-11	yes	down	32.9367	32.1167	38.46	29.09	31.26	28.44	32.74	35.17	hypothetical protein
MGG_00461	gene-MGG_00461	0.631297	-0.66361	0.0145357	0.025672	yes	down	8.42333	9.36	7.84	8.23	9.2	11.8	9.41	6.87	hypothetical protein
MGG_02843	gene-MGG_02843	0.631622	-0.662867	2.37e-08	7.45e-08	yes	down	20.5333	14.2367	20.44	19.13	22.03	14.04	13.19	15.48	exosome complex exonuclease RRP40
MGG_06179	gene-MGG_06179	0.631718	-0.662647	9.81e-08	2.97e-07	yes	down	27.4567	19.36	26.63	31.88	23.86	18.92	19.28	19.88	hypothetical protein
MGG_11489	gene-MGG_11489	0.631739	-0.6626	8.69e-12	3.33e-11	yes	down	9.6	6.76333	8.78	9.83	10.19	6.79	6.96	6.54	hypothetical protein
MGG_06759	gene-MGG_06759	0.63189	-0.662256	3e-33	2.44e-32	yes	down	368.217	259.057	353.26	383.91	367.48	278.54	262.84	235.79	heat shock protein 90
MGG_03520	gene-MGG_03520	0.631916	-0.662196	0.00524853	0.00988977	yes	down	68.44	48.6367	68.37	72.82	64.13	46.31	49.42	50.18	zinc finger protein
MGG_03057	gene-MGG_03057	0.63192	-0.662186	3.97e-06	1.06e-05	yes	down	17.53	12.3633	14.65	19.61	18.33	12.47	12.56	12.06	WD repeat-containing protein
MGG_03243	gene-MGG_03243	0.631957	-0.662101	1.02e-12	4.1e-12	yes	down	33.0067	23.15	33.15	34.07	31.8	25.69	23.45	20.31	peptidyl-prolyl isomerase CWC27
MGG_09179	gene-MGG_09179	0.632378	-0.66114	2.14e-14	9.26e-14	yes	down	22.74	15.8267	21.94	23.29	22.99	15.99	15.69	15.8	hypothetical protein
MGG_04432	gene-MGG_04432	0.632437	-0.661005	3.32e-36	2.89e-35	yes	down	581.87	412.597	580.18	575.1	590.33	419.77	423	395.02	cytochrome P450 51
MGG_01359	gene-MGG_01359	0.632938	-0.659865	6.98e-20	3.81e-19	yes	down	121.47	85.73	118.45	121.72	124.24	80.93	87.52	88.74	saccharopine dehydrogenase
MGG_09393	gene-MGG_09393	0.632993	-0.659738	2.35e-25	1.54e-24	yes	down	101.553	72.22	97.05	102.98	104.63	71.74	77.36	67.56	glutaminyl-tRNA synthetase
MGG_14904	gene-MGG_14904	0.633	-0.659722	1.75e-14	7.64e-14	yes	down	108	76.4067	111.77	107.62	104.61	73.18	73.91	82.13	histidinol-phosphate aminotransferase
MGG_09227	gene-MGG_09227	0.633624	-0.6583	3.57e-32	2.81e-31	yes	down	1396.57	1019.99	1417.57	1377.59	1394.54	1056.06	1029.19	974.73	hypothetical protein
MGG_03072	gene-MGG_03072	0.634169	-0.657061	0.00225811	0.00447074	yes	down	20.3233	14.42	21.66	19.85	19.46	11.28	15.09	16.89	DNA-directed RNA polymerase III subunit RPC10
MGG_00682	gene-MGG_00682	0.634176	-0.657045	6.97e-14	2.95e-13	yes	down	386.767	242.427	393.37	378.19	388.74	248.97	238.56	239.75	cyclin-dependent kinase regulatory subunit
MGG_01034	gene-MGG_01034	0.634404	-0.656527	2.7e-07	7.88e-07	yes	down	6.49333	4.64667	6.28	6.52	6.68	5.09	5.33	3.52	hypothetical protein
MGG_06487	gene-MGG_06487	0.634482	-0.656349	4.46e-12	1.74e-11	yes	down	35.2433	25.11	35.3	35.74	34.69	26.3	26.19	22.84	thymine dioxygenase
MGG_03774	gene-MGG_03774	0.635049	-0.65506	0.000329373	0.000724075	yes	down	5.73333	4.05667	5.59	6.02	5.59	3.99	3.66	4.52	CAIB/BAIF family enzyme
MGG_08260	gene-MGG_08260	0.635126	-0.654885	0.000133428	0.000306057	yes	down	22.3667	15.8867	22.57	19.37	25.16	17.56	12.67	17.43	hypothetical protein
MGG_04562	gene-MGG_04562	0.635253	-0.654596	1.19e-12	4.78e-12	yes	down	32.31	23.1467	31.07	33.21	32.65	22.79	23.21	23.44	tRNA (guanine-N(1)-)-methyltransferase
MGG_06520	gene-MGG_06520	0.635386	-0.654295	2.23e-15	1.01e-14	yes	down	213.473	152.243	207.19	207.47	225.76	153.51	164.6	138.62	hypothetical protein
MGG_06637	gene-MGG_06637	0.63553	-0.653967	3.09e-21	1.77e-20	yes	down	69.9	49.78	67.76	71.65	70.29	49.74	52.28	47.32	acetyltransferase
MGG_07242	gene-MGG_07242	0.635598	-0.653813	0.00301694	0.00588641	yes	down	3.05	2.14667	3.24	3.06	2.85	2.34	2.14	1.96	hypothetical protein
MGG_02758	gene-MGG_02758	0.635896	-0.653137	0.000468248	0.00101177	yes	down	21.9667	15.7967	26.56	19.59	19.75	16.43	17.63	13.33	hypothetical protein
MGG_07126	gene-MGG_07126	0.635966	-0.652978	2.23e-11	8.35e-11	yes	down	20.67	14.75	19.04	21.74	21.23	15.63	15.58	13.04	hypothetical protein
MGG_02970	gene-MGG_02970	0.636373	-0.652055	3.78e-21	2.16e-20	yes	down	68.55	48.9467	67.47	68.13	70.05	49.37	52.13	45.34	ubiquitin carboxyl-terminal hydrolase 6
MGG_00947	gene-MGG_00947	0.636441	-0.651901	1.33e-17	6.61e-17	yes	down	138.003	98.4033	145.73	133.86	134.42	97.14	98.68	99.39	hypothetical protein
MGG_01472	gene-MGG_01472	0.636746	-0.65121	3.73e-22	2.2e-21	yes	down	132.553	94.5133	128.58	129.57	139.51	92.6	97.19	93.75	arf GTPase-activating protein
MGG_03696	gene-MGG_03696	0.636965	-0.650713	7.37e-24	4.63e-23	yes	down	105.023	74.9	96.13	111.04	107.9	75.96	77.51	71.23	CMGC/CK2 protein kinase
MGG_01291	gene-MGG_01291	0.637712	-0.649022	1.56e-12	6.22e-12	yes	down	30.05	21.4833	27.36	34.33	28.46	23.01	22.44	19	glycerol-3-phosphate O-acyltransferase 1
MGG_11764	gene-MGG_11764	0.637795	-0.648835	2.68e-27	1.87e-26	yes	down	688.84	495.257	690.38	692.12	684.02	526.46	527.85	431.46	hypothetical protein
MGG_03310	gene-MGG_03310	0.637874	-0.648657	2.83e-18	1.45e-17	yes	down	76.3333	54.5067	69.68	80.06	79.26	58.15	53.18	52.19	T-complex protein 1 subunit eta
MGG_09900	gene-MGG_09900	0.637879	-0.648646	2.21e-16	1.05e-15	yes	down	117.013	83.99	118.87	114.25	117.92	80.08	92.82	79.07	hypothetical protein
MGG_04990	gene-MGG_04990	0.637984	-0.648408	1.28e-12	5.12e-12	yes	down	39.2867	28.16	36.67	42.64	38.55	30.68	30.18	23.62	hypothetical protein
MGG_06404	gene-MGG_06404	0.638245	-0.647817	6.19e-08	1.89e-07	yes	down	28.9667	20.7267	29.6	30.58	26.72	21.26	21.16	19.76	hypothetical protein
MGG_09882	gene-MGG_09882	0.638297	-0.647699	1.02e-26	6.96e-26	yes	down	871.033	573.613	860.01	862.09	891	560.19	574.93	585.72	hypothetical protein
MGG_07109	gene-MGG_07109	0.638497	-0.647248	1.7e-25	1.12e-24	yes	down	219.263	156.827	220.85	219.13	217.81	155.14	160.56	154.78	eukaryotic translation initiation factor 3 subunit G
MGG_06016	gene-MGG_06016	0.638746	-0.646685	5.16e-12	2e-11	yes	down	14.83	10.6067	13.47	15.35	15.67	11.06	10.6	10.16	hypothetical protein
MGG_01493	gene-MGG_01493	0.638792	-0.646581	3.09e-16	1.45e-15	yes	down	27.1767	19.45	26.64	28.89	26	20.17	19.46	18.72	hypothetical protein
MGG_07475	gene-MGG_07475	0.63896	-0.646202	6.62e-10	2.28e-09	yes	down	60.4367	40.8567	64.78	56.8	59.73	38.71	41.89	41.97	hypothetical protein
MGG_08924	gene-MGG_08924	0.638968	-0.646185	1.04e-10	3.77e-10	yes	down	45.97	32.93	45.58	43.52	48.81	29.92	37.18	31.69	hypothetical protein
MGG_09762	gene-MGG_09762	0.639671	-0.644598	2.18e-07	6.41e-07	yes	down	11.1467	8.00333	11.16	11.34	10.94	8.44	7.98	7.59	hypothetical protein
MGG_01290	gene-MGG_01290	0.6398	-0.644308	3.43e-18	1.75e-17	yes	down	68.11	49.87	68.98	69.51	65.84	54.21	50.84	44.56	nicotinamide mononucleotide adenylyl transferase
MGG_13404	gene-MGG_13404	0.639835	-0.644228	2.18e-07	6.41e-07	yes	down	17.1467	12.3567	17.09	18.16	16.19	12.09	11.41	13.57	3-oxoacyl-[acyl-carrier-protein] reductase
MGG_06611	gene-MGG_06611	0.639987	-0.643886	3.55e-07	1.02e-06	yes	down	12.0133	9.82667	12.81	12.84	10.39	9.29	9.39	10.8	hypothetical protein
MGG_00698	gene-MGG_00698	0.640133	-0.643557	1.38e-20	7.71e-20	yes	down	162.813	116.75	162.84	167.95	157.65	114.96	121.42	113.87	hypothetical protein
MGG_09546	gene-MGG_09546	0.640214	-0.643373	1.06e-17	5.33e-17	yes	down	273.04	196.26	296.31	269.43	253.38	201.79	202.32	184.67	hypothetical protein
MGG_14014	gene-MGG_14014	0.640444	-0.642855	2.62e-18	1.34e-17	yes	down	30.2467	21.84	28.87	31.47	30.4	22.31	22.56	20.65	ubiquitin homeostasis protein lub1
MGG_12798	gene-MGG_12798	0.640462	-0.642815	2.82e-07	8.2e-07	yes	down	12.1767	8.7	11.4	13.98	11.15	8.41	8.85	8.84	para-nitrobenzyl esterase
MGG_01047	gene-MGG_01047	0.640599	-0.642507	8.25e-17	3.97e-16	yes	down	47.8	34.3067	46.75	48.45	48.2	35.64	33.97	33.31	PH domain-containing protein
MGG_00943	gene-MGG_00943	0.640651	-0.64239	6.46e-16	3e-15	yes	down	49.6267	35.73	49.41	48.62	50.85	37.62	34.91	34.66	ethanolamine-phosphate cytidylyltransferase
MGG_01344	gene-MGG_01344	0.641095	-0.641389	1.21e-07	3.64e-07	yes	down	30.96	22.27	29.19	33.38	30.31	22.05	25.26	19.5	BUD32 protein kinase
MGG_17827	gene-MGG_17827	0.64123	-0.641086	6.11e-06	1.6e-05	yes	down	12.7267	9.10333	11.76	13.39	13.03	8.07	9.87	9.37	hypothetical protein
MGG_03317	gene-MGG_03317	0.641523	-0.640427	1.71e-23	1.06e-22	yes	down	137.18	98.61	128.15	138.24	145.15	103.53	98.81	93.49	eukaryotic translation initiation factor 3 subunit E
MGG_06639	gene-MGG_06639	0.641671	-0.640094	2.24e-17	1.1e-16	yes	down	71.0667	51.26	70.29	70.85	72.06	52.45	56.84	44.49	T-complex protein 1 subunit gamma
MGG_08560	gene-MGG_08560	0.641806	-0.63979	3.07e-24	1.93e-23	yes	down	255.857	185.217	245.07	260.28	262.22	184.6	192.68	178.37	hypothetical protein, variant
MGG_01461	gene-MGG_01461	0.642039	-0.639268	1.93e-29	1.43e-28	yes	down	571.95	411.597	582.94	564.5	568.41	407.76	425.01	402.02	hypothetical protein
MGG_02967	gene-MGG_02967	0.642127	-0.639069	1.36e-06	3.73e-06	yes	down	13.8867	9.84333	13.89	14.43	13.34	9.29	10.75	9.49	phosphoglycerate mutase
MGG_02841	gene-MGG_02841	0.642171	-0.638971	1.32e-09	4.47e-09	yes	down	20.8733	14.9533	19.67	22.2	20.75	14.98	15.59	14.29	xaa-Pro aminopeptidase family enzyme
MGG_11663	gene-MGG_11663	0.642325	-0.638624	0.000106888	0.000247533	yes	down	10.3867	7.36667	9.89	9.82	11.45	8.07	6.85	7.18	zinc-binding oxidoreductase CipB
MGG_00738	gene-MGG_00738	0.642979	-0.637156	1.8e-09	6.07e-09	yes	down	31.78	22.76	31.98	32.57	30.79	23.86	22.46	21.96	zinc-binding alcohol dehydrogenase domain-containing protein 2
MGG_01044	gene-MGG_01044	0.642998	-0.637114	2.38e-13	9.85e-13	yes	down	64.1767	30.7767	68.25	60.92	63.36	33.27	31.37	27.69	mitochondrial Rho GTPase 1
MGG_06944	gene-MGG_06944	0.64322	-0.636616	0.014926	0.0263219	yes	down	4.86	3.49667	3.66	5.5	5.42	3.9	3.57	3.02	zinc finger protein RTS2
MGG_09640	gene-MGG_09640	0.643675	-0.635596	1.22e-33	1e-32	yes	down	681.657	491.883	687.7	694.27	663	501.52	505.24	468.89	alpha-amylase 1
MGG_00222	gene-MGG_00222	0.643779	-0.635364	3.25e-06	8.69e-06	yes	down	8.99	6.47333	9.33	9.09	8.55	5.85	6.84	6.73	dynactin Arp1 p62 subunit RO2
MGG_01639	gene-MGG_01639	0.644224	-0.634366	2.8e-14	1.21e-13	yes	down	36.0833	25.5233	38.11	31.62	38.52	29.73	22.36	24.48	condensin complex component cnd2
MGG_17683	gene-MGG_17683	0.644225	-0.634364	3.34e-09	1.1e-08	yes	down	15.89	11.4867	14.33	17.04	16.3	13.52	11.14	9.8	hypothetical protein
MGG_17701	gene-MGG_17701	0.644291	-0.634216	0.00106573	0.0022037	yes	down	9.52667	6.82	8.41	10.78	9.39	7.05	5.79	7.62	hypothetical protein
MGG_03700	gene-MGG_03700	0.644381	-0.634014	3.38e-09	1.12e-08	yes	down	7.13	5.16	6.63	7.92	6.84	5.59	5.42	4.47	hypothetical protein
MGG_03561	gene-MGG_03561	0.644772	-0.633139	4.23e-07	1.21e-06	yes	down	22.71	16.4633	21.71	24.33	22.09	19.23	16.3	13.86	N-terminal acetyltransferase C complex catalytic subunit MAK3
MGG_04879	gene-MGG_04879	0.644852	-0.63296	4.38e-05	0.000105459	yes	down	17.0067	12.8067	19.86	13.6	17.56	12.57	10.46	15.39	hypothetical protein
MGG_11385	gene-MGG_11385	0.645101	-0.632404	4.7e-13	1.93e-12	yes	down	48.8267	35.4033	50.42	45.8	50.26	37.92	34.83	33.46	hypothetical protein
MGG_03195	gene-MGG_03195	0.64535	-0.631847	2.33e-13	9.67e-13	yes	down	67.8933	48.98	66.89	69.81	66.98	47.74	50.17	49.03	hypothetical protein
MGG_08750	gene-MGG_08750	0.645703	-0.631057	0.00357415	0.00689504	yes	down	7.40333	5.37333	8.56	6.8	6.85	6.19	4.53	5.4	hypothetical protein
MGG_05915	gene-MGG_05915	0.645716	-0.631029	2e-17	9.9e-17	yes	down	149.247	105.277	148.21	155.5	144.03	96.72	105.65	113.46	fumarylacetoacetate hydrolase domain-containing protein 2A
MGG_05730	gene-MGG_05730	0.64574	-0.630974	4.7e-14	2.01e-13	yes	down	64.83	46.76	61.49	67.56	65.44	47.09	44.36	48.83	GTP-binding protein RBG1
MGG_00909	gene-MGG_00909	0.645763	-0.630924	1.29e-10	4.64e-10	yes	down	18.4167	13.3733	17.59	19.15	18.51	14.03	14.9	11.19	hypothetical protein
MGG_12737	gene-MGG_12737	0.646152	-0.630054	0.000165556	0.000375454	yes	down	8.21	5.90333	7.12	8.61	8.9	4.78	6.7	6.23	creatine transporter
MGG_12154	gene-MGG_12154	0.646498	-0.629282	2.28e-15	1.03e-14	yes	down	219.09	156.573	162.62	252.16	242.49	211.18	148.83	109.71	fatty acid synthase subunit alpha
MGG_01772	gene-MGG_01772	0.646556	-0.629154	3.44e-07	9.92e-07	yes	down	30.5067	22.0767	29.05	31.98	30.49	22.75	22.12	21.36	hypothetical protein
MGG_06503	gene-MGG_06503	0.646725	-0.628776	8.43e-14	3.56e-13	yes	down	128.557	92.9233	132.34	131.75	121.58	93.4	86.7	98.67	hypothetical protein
MGG_05648	gene-MGG_05648	0.646726	-0.628773	3.28e-09	1.09e-08	yes	down	63.2067	45.9067	64.24	62.41	62.97	43.98	51.53	42.21	hypothetical protein
MGG_04974	gene-MGG_04974	0.646735	-0.628753	3.48e-23	2.13e-22	yes	down	797.473	577.603	805.85	790.14	796.43	546.37	604.95	581.49	hypothetical protein
MGG_06379	gene-MGG_06379	0.646894	-0.628399	4.18e-05	0.000100679	yes	down	2.65	1.93667	2.18	2.94	2.83	2.38	2.12	1.31	midasin
MGG_02789	gene-MGG_02789	0.647208	-0.6277	3.48e-06	9.29e-06	yes	down	12.6633	9.15333	12.09	13.72	12.18	8.95	9.14	9.37	hypothetical protein
MGG_08896	gene-MGG_08896	0.647223	-0.627666	1.23e-10	4.44e-10	yes	down	53.9367	39.0167	56.45	55.41	49.95	38.37	37.14	41.54	peroxisomal biogenesis factor
MGG_05321	gene-MGG_05321	0.647863	-0.62624	3.51e-12	1.38e-11	yes	down	63.28	46.25	61.46	63.1	65.28	45.34	46.02	47.39	DNA-directed RNA polymerase I
MGG_15139	gene-MGG_15139	0.64816	-0.625577	1.62e-12	6.47e-12	yes	down	18.13	13.21	16.76	18.45	19.18	14.23	14.03	11.37	hypothetical protein
MGG_01297	gene-MGG_01297	0.648207	-0.625473	1.17e-11	4.45e-11	yes	down	91.3433	66.29	95.03	84.98	94.02	67	62.78	69.09	hypothetical protein
MGG_17329	gene-MGG_17329	0.648212	-0.625462	0.000980934	0.00203747	yes	down	7.21333	5.02333	6.99	8.2	6.45	5.69	3.89	5.49	hypothetical protein
MGG_07171	gene-MGG_07171	0.648306	-0.625254	4.93e-18	2.5e-17	yes	down	186.293	135.46	201.14	172.18	185.56	135.13	144.97	126.28	hypothetical protein
MGG_16750	gene-MGG_16750	0.648458	-0.624914	1.02e-06	2.82e-06	yes	down	25.5567	18.53	23.83	23.58	29.26	18.61	17.81	19.17	hypothetical protein
MGG_15527	gene-MGG_15527	0.649132	-0.623417	1.3e-21	7.59e-21	yes	down	112.277	76.62	110.77	116.22	109.84	76.77	76.54	76.55	hypothetical protein
MGG_05376	gene-MGG_05376	0.649256	-0.623141	7.5e-18	3.78e-17	yes	down	30.94	24.6533	27.73	30.32	34.77	20.81	33.69	19.46	AGC/NDR protein kinase
MGG_04603	gene-MGG_04603	0.650546	-0.620278	0.0239408	0.0408688	yes	down	2.02333	1.47	1.5	2.83	1.74	1.59	1.63	1.19	hypothetical protein
MGG_15622	gene-MGG_15622	0.650547	-0.620276	0.00411337	0.00786242	yes	down	9.15	6.63	5.49	12.13	9.83	7.52	6.05	6.32	hypothetical protein
MGG_00449	gene-MGG_00449	0.650824	-0.619662	2.47e-23	1.52e-22	yes	down	196.537	143.173	180.22	207.55	201.84	153.53	143.26	132.73	eukaryotic peptide chain release factor GTP-binding subunit
MGG_12957	gene-MGG_12957	0.651182	-0.618868	2.34e-05	5.78e-05	yes	down	14.56	12.0033	15.26	16.11	12.31	11.25	12.91	11.85	hypothetical protein
MGG_16925	gene-MGG_16925	0.651239	-0.618741	0.00584722	0.0109537	yes	down	9.52333	5.93667	8.98	13.05	6.54	5.01	5.31	7.49	hypothetical protein
MGG_04011	gene-MGG_04011	0.651311	-0.618581	0.000150079	0.000341888	yes	down	3.34667	2.45	3.13	3.93	2.98	2.72	2.7	1.93	hypothetical protein
MGG_05436	gene-MGG_05436	0.65164	-0.617852	4.02e-17	1.96e-16	yes	down	135.327	98.6633	122.99	141.91	141.08	98.89	102.41	94.69	translation machinery-associated protein 20
MGG_08619	gene-MGG_08619	0.652207	-0.616597	0.000278906	0.000619027	yes	down	15.9767	11.67	16.47	17.88	13.58	11.21	12.25	11.55	aryl-alcohol dehydrogenase
MGG_09756	gene-MGG_09756	0.652486	-0.61598	5.36e-05	0.000128125	yes	down	24.8633	18.0967	20.55	30.23	23.81	19.23	18.06	17	hypothetical protein
MGG_08895	gene-MGG_08895	0.652525	-0.615895	1.57e-19	8.5e-19	yes	down	303.163	221.273	304.09	303.34	302.06	223.35	211.33	229.14	fructose-1,6-bisphosphatase
MGG_06144	gene-MGG_06144	0.652608	-0.615711	0.00376877	0.00725467	yes	down	35.83	26.44	43.52	33.17	30.8	26.46	29.98	22.88	hypothetical protein
MGG_01675	gene-MGG_01675	0.652881	-0.615109	1.5e-10	5.39e-10	yes	down	57.69	42.1433	62.03	57.59	53.45	42.82	42.19	41.42	hypothetical protein
MGG_16315	gene-MGG_16315	0.653087	-0.614653	6.11e-15	2.72e-14	yes	down	66.4267	48.5933	69.41	64.05	65.82	46.92	49.54	49.32	hypothetical protein
MGG_04446	gene-MGG_04446	0.653801	-0.613076	4.57e-26	3.06e-25	yes	down	185.15	141.73	185.7	181.89	187.86	148.16	143.75	133.28	thermosensitive gluconokinase
MGG_01043	gene-MGG_01043	0.654304	-0.611967	4.67e-18	2.37e-17	yes	down	58.9733	37.39	61.91	58.51	56.5	36.46	38.68	37.03	catabolite repression protein creC
MGG_10507	gene-MGG_10507	0.65446	-0.611623	1.1e-12	4.43e-12	yes	down	40.5167	29.8233	38.17	42.27	41.11	31.51	33.41	24.55	amidohydrolase
MGG_03281	gene-MGG_03281	0.654774	-0.610931	6.81e-22	3.99e-21	yes	down	133.95	95.6167	129.62	139.38	132.85	94.93	98.67	93.25	chorismate synthase, variant
MGG_06111	gene-MGG_06111	0.654916	-0.610619	1.59e-15	7.25e-15	yes	down	30.89	22.5933	29.61	31.47	31.59	23.29	22.6	21.89	mitotic checkpoint protein BUB3
MGG_03574	gene-MGG_03574	0.654974	-0.610491	0.000222102	0.000497422	yes	down	7.62333	5.59667	7.6	8.53	6.74	4.72	6.99	5.08	hypothetical protein
MGG_00053	gene-MGG_00053	0.65527	-0.609838	1.47e-11	5.56e-11	yes	down	24.85	18.2667	23.32	25.74	25.49	19.46	18.72	16.62	hypothetical protein
MGG_17035	gene-MGG_17035	0.655635	-0.609034	1.32e-07	3.96e-07	yes	down	39.7567	27.0467	44.36	37.48	37.43	22.97	30.85	27.32	hypothetical protein
MGG_00361	gene-MGG_00361	0.6558	-0.608673	1.64e-07	4.89e-07	yes	down	18.03	13.3133	17.39	18.8	17.9	14.46	14.67	10.81	hypothetical protein
MGG_08689	gene-MGG_08689	0.655833	-0.608599	7.75e-15	3.43e-14	yes	down	47.5167	34.8533	42.7	52.71	47.14	38	36.47	30.09	AGC/PKC protein kinase
MGG_15807	gene-MGG_15807	0.65589	-0.608474	2.51e-07	7.35e-07	yes	down	8.93333	15.4267	8.57	7.93	10.3	15.82	15.73	14.73	hypothetical protein
MGG_08771	gene-MGG_08771	0.65593	-0.608386	6.78e-09	2.2e-08	yes	down	41.9533	29.9233	42.52	42.84	40.5	30.15	29.34	30.28	hypothetical protein
MGG_07916	gene-MGG_07916	0.655973	-0.608292	4.5e-17	2.19e-16	yes	down	72.3667	53.1733	67.34	75.59	74.17	56.23	54.06	49.23	vacuolar protein sorting-associated protein 4
MGG_05467	gene-MGG_05467	0.656087	-0.608042	5.41e-19	2.88e-18	yes	down	181.897	133.63	186.86	181.41	177.42	126.55	139.21	135.13	sodium/nucleoside cotransporter 1
MGG_01014	gene-MGG_01014	0.656218	-0.607752	9.44e-22	5.51e-21	yes	down	72.0233	52.9867	68.17	74.57	73.33	57.47	51.86	49.63	C-1-tetrahydrofolate synthase
MGG_04459	gene-MGG_04459	0.656274	-0.60763	2.82e-09	9.38e-09	yes	down	8.61	6.33667	8.41	8.73	8.69	6.89	6.24	5.88	hypothetical protein
MGG_09859	gene-MGG_09859	0.656389	-0.607377	0.000113937	0.000263054	yes	down	14.9333	10.6733	12.85	16.16	15.79	9.27	11.74	11.01	hypothetical protein
MGG_03186	gene-MGG_03186	0.65648	-0.607177	1.86e-20	1.04e-19	yes	down	356.083	261.823	317.78	377.41	373.06	282.65	257.6	245.22	1,4-alpha-glucan-branching enzyme
MGG_03102	gene-MGG_03102	0.656579	-0.60696	2.04e-09	6.84e-09	yes	down	47.04	34.6233	49.67	46.79	44.66	30.41	34	39.46	hypothetical protein
MGG_08884	gene-MGG_08884	0.656866	-0.60633	5.1e-10	1.78e-09	yes	down	11.83	8.75333	10.49	12.72	12.28	9.72	8.9	7.64	hypothetical protein
MGG_12515	gene-MGG_12515	0.656868	-0.606324	2.94e-08	9.16e-08	yes	down	15.2533	11.71	13.8	18.1	13.86	11.78	13.32	10.03	hypothetical protein
MGG_08049	gene-MGG_08049	0.656922	-0.606206	7.77e-05	0.000182389	yes	down	8.31667	6.16667	9.04	8.7	7.21	6.96	6.61	4.93	ATP-dependent RNA helicase DBP4
MGG_13651	gene-MGG_13651	0.656936	-0.606174	7.56e-09	2.45e-08	yes	down	29.1167	21.0667	28.14	29.64	29.57	19.86	21.3	22.04	high-affinity glucose transporter
MGG_10740	gene-MGG_10740	0.657112	-0.605788	3.21e-11	1.19e-10	yes	down	71.1633	52.0467	70.75	76.24	66.5	48.94	54.3	52.9	sm snRNP core protein Smg1
MGG_10574	gene-MGG_10574	0.657265	-0.605454	2.07e-07	6.11e-07	yes	down	141.603	104.103	137.89	135.56	151.36	96.31	104.75	111.25	GNAT family N-acetyltransferase
MGG_12098	gene-MGG_12098	0.657704	-0.604491	2.59e-10	9.19e-10	yes	down	21.16	15.63	21.25	21.18	21.05	15.82	15.76	15.31	orotidine 5'-phosphate decarboxylase
MGG_12176	gene-MGG_12176	0.657707	-0.604482	0.000338996	0.000744304	yes	down	17.56	8.95333	21.94	19	11.74	10.14	6.78	9.94	hypothetical protein
MGG_01460	gene-MGG_01460	0.657923	-0.604009	0.00020945	0.00046998	yes	down	18.94	13.9533	21.3	19.84	15.68	13.62	13.65	14.59	hypothetical protein
MGG_03220	gene-MGG_03220	0.658146	-0.603521	1.86e-19	1e-18	yes	down	113.367	83.7467	102.73	117.32	120.05	88.32	88.28	74.64	isoleucyl-tRNA synthetase
MGG_05344	gene-MGG_05344	0.658303	-0.603177	2.09e-21	1.21e-20	yes	down	25404.2	18698.9	24864.5	25678.4	25669.7	19527.9	17662.8	18906	SnodProt1
MGG_04882	gene-MGG_04882	0.658326	-0.603125	7.96e-15	3.52e-14	yes	down	67.7533	50.0067	69.52	65.7	68.04	48.96	52.12	48.94	hypothetical protein
MGG_13202	gene-MGG_13202	0.658365	-0.603041	5.88e-26	3.91e-25	yes	down	213.79	152.437	208.28	216.17	216.92	156.74	150.77	149.8	hypothetical protein
MGG_05138	gene-MGG_05138	0.658984	-0.601685	3.16e-09	1.05e-08	yes	down	54.3533	40.54	54.24	56.33	52.49	36.17	42.82	42.63	sporulation protein SPS19
MGG_08103	gene-MGG_08103	0.659011	-0.601625	1.12e-08	3.58e-08	yes	down	42.08	31.1133	42.73	42.02	41.49	30.6	33.41	29.33	ATP binding/alanine-tRNA ligase
MGG_07161	gene-MGG_07161	0.659119	-0.601389	9.15e-13	3.69e-12	yes	down	37.73	27.8967	34.77	39.4	39.02	30.93	27.71	25.05	kinase isozyme 4
MGG_06184	gene-MGG_06184	0.65916	-0.6013	1.16e-17	5.79e-17	yes	down	87.3167	66.5267	87.22	85.85	88.88	68.31	67.93	63.34	hypothetical protein
[truncated: 4,312 more rows]
