# Supplementary material for: Transcriptome and Quasi-Targeted Metabolome Analyze Overexpression of 4-Hydroxyphenylpyruvate Dioxygenase Alleviates Fungal Toxicity of 9-Phenanthrol in Magnaporthe oryzae
Source: Int J Mol Sci. 2022 Jun 27;23(13):7116. doi: 10.3390/ijms23137116 (PMC9266922; doi:10.3390/ijms23137116)
Supplement: Supplementary file 1 [file ijms-23-07116-s001.zip › Table S2.xlsx]

## Sheet: Sheet1
Table S2. The GO enrichment analysis of upregulated genes in M. oryzae with 9-phenanthrol.
Category	Term	Count	%	PValue	Genes	List Total	Pop Hits	Pop Total	Fold Enrichment	Bonferroni	Benjamini	FDR
GOTERM_BP_DIRECT	GO:0043581~mycelium development	318	9.91272	3.32635e-10	MGG_04105, MGG_01013, MGG_07611, MGG_12892, MGG_08053, MGG_16969, MGG_04455, MGG_08055, MGG_07446, MGG_08050, MGG_17153, MGG_10370, MGG_06189, MGG_03945, MGG_10607, MGG_04802, MGG_07143, MGG_07048, MGG_00431, MGG_06559, MGG_04114, MGG_01041, MGG_16854, MGG_09031, MGG_01045, MGG_09032, MGG_08049, MGG_01575, MGG_04444, MGG_10358, MGG_06958, MGG_06766, MGG_06571, MGG_00546, MGG_06759, MGG_00548, MGG…	1572	631	4024	1.29004	3.38955e-07	3.38955e-07	5.26814e-07
GOTERM_BP_DIRECT	GO:0006412~translation	69	2.15087	5.03413e-07	MGG_02747, MGG_09894, MGG_12892, MGG_07753, MGG_04455, MGG_13782, MGG_06658, MGG_06044, MGG_10370, MGG_10680, MGG_02953, MGG_08163, MGG_02952, MGG_03372, MGG_03136, MGG_03135, MGG_01315, MGG_07048, MGG_04114, MGG_05238, MGG_11776, MGG_05673, MGG_08834, MGG_04484, MGG_06721, MGG_02872, MGG_03236, MGG_04444, MGG_06571, MGG_00546, MGG_03653, MGG_06952, MGG_00349, MGG_03554, MGG_06479, MGG_05248, MGG…	1572	109	4024	1.62042	0.000512846	0.000256456	0.000797282
GOTERM_BP_DIRECT	GO:0006364~rRNA processing	33	1.02868	9.6176e-07	MGG_04179, MGG_17514, MGG_16274, MGG_03173, MGG_01268, MGG_03057, MGG_07258, MGG_08908, MGG_17539, MGG_02453, MGG_04802, MGG_16744, MGG_03135, MGG_16901, MGG_08079, MGG_07915, MGG_05963, MGG_04993, MGG_02761, MGG_05146, MGG_00178, MGG_08049, MGG_05810, MGG_04523, MGG_03581, MGG_01087, MGG_07136, MGG_06837, MGG_07449, MGG_04201, MGG_03733, MGG_00977, MGG_08178	1572	42	4024	2.01127	0.000979554	0.000326625	0.00152319
GOTERM_BP_DIRECT	GO:0042254~ribosome biogenesis	20	0.623441	6.31257e-06	MGG_02723, MGG_14350, MGG_00363, MGG_03556, MGG_05436, MGG_06202, MGG_16442, MGG_01078, MGG_06346, MGG_05721, MGG_17694, MGG_05999, MGG_09302, MGG_04612, MGG_07529, MGG_07718, MGG_08867, MGG_04995, MGG_10116, MGG_07915	1572	22	4024	2.32709	0.00641188	0.00160684	0.00999713
GOTERM_BP_DIRECT	GO:0000462~maturation of SSU-rRNA from tricistronic rRNA transcript (SSU-rRNA, 5.8S rRNA, LSU-rRNA)	18	0.561097	7.41255e-06	MGG_04641, MGG_03129, MGG_03893, MGG_10652, MGG_09254, MGG_02467, MGG_03597, MGG_01183, MGG_06500, MGG_03210, MGG_13447, MGG_03372, MGG_07119, MGG_16212, MGG_00349, MGG_12957, MGG_06522, MGG_00523	1572	19	4024	2.42507	0.00752496	0.00150954	0.0117391
GOTERM_BP_DIRECT	GO:0001731~formation of translation preinitiation complex	17	0.529925	1.71573e-05	MGG_00341, MGG_00789, MGG_01013, MGG_05156, MGG_10653, MGG_08693, MGG_16895, MGG_03855, MGG_03317, MGG_10192, MGG_07109, MGG_13200, MGG_01595, MGG_05264, MGG_01978, MGG_01592, MGG_05266	1572	18	4024	2.41759	0.0173315	0.00290967	0.0271696
GOTERM_BP_DIRECT	GO:0000027~ribosomal large subunit assembly	16	0.498753	3.94581e-05	MGG_02761, MGG_03080, MGG_02417, MGG_04467, MGG_03057, MGG_10382, MGG_08908, MGG_03193, MGG_01078, MGG_06322, MGG_06346, MGG_08708, MGG_07525, MGG_07048, MGG_06429, MGG_06379	1572	17	4024	2.40922	0.0394109	0.00572761	0.0624739
GOTERM_BP_DIRECT	GO:0006446~regulation of translational initiation	16	0.498753	3.94581e-05	MGG_02390, MGG_00341, MGG_17708, MGG_01013, MGG_06077, MGG_10653, MGG_03517, MGG_16895, MGG_03855, MGG_03317, MGG_10192, MGG_07109, MGG_01595, MGG_13245, MGG_01978, MGG_05266	1572	17	4024	2.40922	0.0394109	0.00572761	0.0624739
GOTERM_BP_DIRECT	GO:0000463~maturation of LSU-rRNA from tricistronic rRNA transcript (SSU-rRNA, 5.8S rRNA, LSU-rRNA)	15	0.467581	9.0098e-05	MGG_06322, MGG_10835, MGG_09313, MGG_02460, MGG_17694, MGG_01292, MGG_03893, MGG_08140, MGG_15079, MGG_10382, MGG_11063, MGG_06429, MGG_06522, MGG_00560, MGG_01183	1572	16	4024	2.39981	0.0877252	0.0114111	0.142598
GOTERM_BP_DIRECT	GO:0000447~endonucleolytic cleavage in ITS1 to separate SSU-rRNA from 5.8S rRNA and LSU-rRNA from tricistronic rRNA transcript (SSU-rRNA, 5.8S rRNA, LSU-rRNA)	19	0.592269	0.000143943	MGG_11193, MGG_07008, MGG_07465, MGG_01000, MGG_06242, MGG_05136, MGG_03872, MGG_04470, MGG_05815, MGG_11360, MGG_07433, MGG_08705, MGG_07737, MGG_14748, MGG_03271, MGG_08302, MGG_00473, MGG_01315, MGG_04995	1572	23	4024	2.11461	0.136437	0.0161667	0.227729
GOTERM_BP_DIRECT	GO:0000055~ribosomal large subunit export from nucleus	11	0.342893	0.000574798	MGG_17514, MGG_06322, MGG_01561, MGG_01709, MGG_03150, MGG_04430, MGG_02526, MGG_03291, MGG_04528, MGG_08590, MGG_05817	1572	11	4024	2.5598	0.443388	0.0569054	0.90647
GOTERM_BP_DIRECT	GO:0042273~ribosomal large subunit biogenesis	11	0.342893	0.000574798	MGG_02453, MGG_07136, MGG_17694, MGG_08053, MGG_10160, MGG_07449, MGG_13803, MGG_03291, MGG_07126, MGG_08867, MGG_03581	1572	11	4024	2.5598	0.443388	0.0569054	0.90647
GOTERM_BP_DIRECT	GO:0000480~endonucleolytic cleavage in 5'-ETS of tricistronic rRNA transcript (SSU-rRNA, 5.8S rRNA, LSU-rRNA)	15	0.467581	0.000940512	MGG_07008, MGG_07465, MGG_01000, MGG_03872, MGG_04470, MGG_05815, MGG_11360, MGG_07433, MGG_07737, MGG_14748, MGG_03271, MGG_08302, MGG_00473, MGG_01315, MGG_04995	1572	18	4024	2.13316	0.61666	0.0834756	1.4792
GOTERM_BP_DIRECT	GO:0000472~endonucleolytic cleavage to generate mature 5'-end of SSU-rRNA from (SSU-rRNA, 5.8S rRNA, LSU-rRNA)	15	0.467581	0.000940512	MGG_07008, MGG_07465, MGG_01000, MGG_05136, MGG_03872, MGG_04470, MGG_05815, MGG_11360, MGG_07737, MGG_14748, MGG_03271, MGG_08302, MGG_00473, MGG_01315, MGG_04995	1572	18	4024	2.13316	0.61666	0.0834756	1.4792
GOTERM_BP_DIRECT	GO:0008652~cellular amino acid biosynthetic process	12	0.374065	0.00101785	MGG_04144, MGG_07224, MGG_06425, MGG_00942, MGG_01128, MGG_03281, MGG_08596, MGG_05734, MGG_02489, MGG_07384, MGG_12805, MGG_09766	1572	13	4024	2.36289	0.645739	0.0828432	1.59992
GOTERM_BP_DIRECT	GO:0000466~maturation of 5.8S rRNA from tricistronic rRNA transcript (SSU-rRNA, 5.8S rRNA, LSU-rRNA)	12	0.374065	0.00101785	MGG_06322, MGG_10835, MGG_02460, MGG_09313, MGG_17694, MGG_03893, MGG_08140, MGG_15079, MGG_10382, MGG_06429, MGG_00560, MGG_01183	1572	13	4024	2.36289	0.645739	0.0828432	1.59992
GOTERM_BP_DIRECT	GO:0006189~'de novo' IMP biosynthetic process	9	0.280549	0.00314247	MGG_04435, MGG_11343, MGG_01256, MGG_08008, MGG_03645, MGG_13813, MGG_11541, MGG_12537, MGG_04618	1572	9	4024	2.5598	0.959531	0.218632	4.86255
GOTERM_BP_DIRECT	GO:0042797~tRNA transcription from RNA polymerase III promoter	10	0.311721	0.012654	MGG_11667, MGG_09284, MGG_06984, MGG_04477, MGG_03072, MGG_05321, MGG_10446, MGG_03225, MGG_06083, MGG_06311	1572	12	4024	2.13316	0.999998	0.604224	18.265
GOTERM_BP_DIRECT	GO:0009082~branched-chain amino acid biosynthetic process	7	0.218204	0.0164151	MGG_05223, MGG_01104, MGG_01139, MGG_00942, MGG_02489, MGG_05345, MGG_01553	1572	7	4024	2.5598	1	0.675149	23.0592
GOTERM_BP_DIRECT	GO:0006606~protein import into nucleus	9	0.280549	0.024903	MGG_15072, MGG_00594, MGG_13535, MGG_05203, MGG_03537, MGG_07126, MGG_08590, MGG_03668, MGG_06426	1572	11	4024	2.09438	1	0.79933	32.9277
GOTERM_BP_DIRECT	GO:0006099~tricarboxylic acid cycle	12	0.374065	0.0286016	MGG_00168, MGG_02617, MGG_04895, MGG_00167, MGG_03521, MGG_17962, MGG_01995, MGG_08584, MGG_07202, MGG_08835, MGG_04876, MGG_07268	1572	17	4024	1.80692	1	0.824375	36.8454
GOTERM_BP_DIRECT	GO:0000056~ribosomal small subunit export from nucleus	6	0.187032	0.0366055	MGG_08705, MGG_04430, MGG_11862, MGG_03872, MGG_04528, MGG_10665	1572	6	4024	2.5598	1	0.878903	44.6017
GOTERM_BP_DIRECT	GO:0042274~ribosomal small subunit biogenesis	6	0.187032	0.0366055	MGG_11039, MGG_06837, MGG_04201, MGG_02572, MGG_00977, MGG_10665	1572	6	4024	2.5598	1	0.878903	44.6017
GOTERM_BP_DIRECT	GO:0006417~regulation of translation	6	0.187032	0.0366055	MGG_09505, MGG_03388, MGG_06124, MGG_04710, MGG_04742, MGG_00369	1572	6	4024	2.5598	1	0.878903	44.6017
GOTERM_BP_DIRECT	GO:0043248~proteasome assembly	8	0.249377	0.0477607	MGG_03524, MGG_03211, MGG_08744, MGG_09254, MGG_04342, MGG_09216, MGG_05991, MGG_00331	1572	10	4024	2.04784	1	0.927536	53.9331
GOTERM_BP_DIRECT	GO:0002181~cytoplasmic translation	10	0.311721	0.0496964	MGG_06333, MGG_03983, MGG_00559, MGG_04467, MGG_05730, MGG_03551, MGG_06124, MGG_05014, MGG_05264, MGG_04566	1572	14	4024	1.82843	1	0.925512	55.3941
GOTERM_BP_DIRECT	GO:0044271~cellular nitrogen compound biosynthetic process	23	0.716958	0.0705873	MGG_10440, MGG_07620, MGG_04847, MGG_09063, MGG_07935, MGG_00220, MGG_07933, MGG_02612, MGG_08670, MGG_03494, MGG_09297, MGG_08890, MGG_08589, MGG_03957, MGG_17079, MGG_07884, MGG_07144, MGG_06661, MGG_16392, MGG_10800, MGG_05982, MGG_07980, MGG_10441	1572	43	4024	1.36919	1	0.971334	68.631
GOTERM_BP_DIRECT	GO:0009097~isoleucine biosynthetic process	5	0.15586	0.079748	MGG_07224, MGG_03051, MGG_15774, MGG_06868, MGG_11450	1572	5	4024	2.5598	1	0.978707	73.1855
GOTERM_BP_DIRECT	GO:0019878~lysine biosynthetic process via aminoadipic acid	5	0.15586	0.079748	MGG_01359, MGG_01092, MGG_17041, MGG_04842, MGG_02611	1572	5	4024	2.5598	1	0.978707	73.1855
GOTERM_BP_DIRECT	GO:0006999~nuclear pore organization	5	0.15586	0.079748	MGG_13535, MGG_08911, MGG_03074, MGG_08590, MGG_06426	1572	5	4024	2.5598	1	0.978707	73.1855
GOTERM_BP_DIRECT	GO:0009073~aromatic amino acid family biosynthetic process	5	0.15586	0.079748	MGG_01128, MGG_03281, MGG_08596, MGG_05734, MGG_09766	1572	5	4024	2.5598	1	0.978707	73.1855
GOTERM_BP_DIRECT	GO:0010499~proteasomal ubiquitin-independent protein catabolic process	10	0.311721	0.0820688	MGG_08343, MGG_00170, MGG_04622, MGG_07130, MGG_04342, MGG_01153, MGG_04053, MGG_00331, MGG_04529, MGG_04551	1572	15	4024	1.70653	1	0.977493	74.2367
GOTERM_BP_DIRECT	GO:0009086~methionine biosynthetic process	9	0.280549	0.085291	MGG_01728, MGG_10852, MGG_11805, MGG_08171, MGG_03051, MGG_05888, MGG_11450, MGG_15027, MGG_07627	1572	13	4024	1.77217	1	0.977294	75.6323
GOTERM_BP_DIRECT	GO:0030490~maturation of SSU-rRNA	6	0.187032	0.0870815	MGG_00851, MGG_03856, MGG_12272, MGG_04995, MGG_07915, MGG_05701	1572	7	4024	2.19411	1	0.97561	76.3769
GOTERM_BP_DIRECT	GO:0001522~pseudouridine synthesis	6	0.187032	0.0870815	MGG_08626, MGG_02723, MGG_08117, MGG_07518, MGG_16154, MGG_10116	1572	7	4024	2.19411	1	0.97561	76.3769
GOTERM_BP_DIRECT	GO:0006096~glycolytic process	8	0.249377	0.0877616	MGG_12822, MGG_03041, MGG_10607, MGG_00223, MGG_01084, MGG_09289, MGG_05063, MGG_08905	1572	11	4024	1.86167	1	0.972675	76.6541
GOTERM_BP_DIRECT	GO:0006520~cellular amino acid metabolic process	7	0.218204	0.0887994	MGG_08074, MGG_04156, MGG_07195, MGG_05067, MGG_17828, MGG_11389, MGG_05247	1572	9	4024	1.99095	1	0.970091	77.0711
GOTERM_CC_DIRECT	GO:0005829~cytosol	369	11.5025	2.82556e-25	MGG_01419, MGG_03173, MGG_04311, MGG_03072, MGG_10504, MGG_03074, MGG_07756, MGG_05936, MGG_06083, MGG_06082, MGG_11360, MGG_06189, MGG_07148, MGG_13447, MGG_04446, MGG_04110, MGG_04802, MGG_00170, MGG_07143, MGG_03561, MGG_04566, MGG_00175, MGG_02819, MGG_01978, MGG_06184, MGG_12098, MGG_00943, MGG_01046, MGG_08049, MGG_01044, MGG_01675, MGG_04444, MGG_03961, MGG_07229, MGG_12345, MGG_13499, MGG…	1498	765	4707	1.51564	1.01155e-22	1.01155e-22	3.87745e-22
GOTERM_CC_DIRECT	GO:0005730~nucleolus	97	3.02369	1.85516e-21	MGG_00087, MGG_17514, MGG_03612, MGG_16274, MGG_05136, MGG_03072, MGG_08053, MGG_03572, MGG_08908, MGG_05701, MGG_11360, MGG_05700, MGG_01078, MGG_06322, MGG_09004, MGG_02453, MGG_03270, MGG_14268, MGG_04802, MGG_00985, MGG_01315, MGG_04565, MGG_06522, MGG_04993, MGG_04641, MGG_05146, MGG_06242, MGG_08049, MGG_09917, MGG_05810, MGG_06944, MGG_04523, MGG_15079, MGG_11063, MGG_04444, MGG_06202, MGG…	1498	135	4707	2.25772	6.64147e-19	3.32073e-19	2.54578e-18
GOTERM_CC_DIRECT	GO:0005840~ribosome	58	1.80798	2.15789e-14	MGG_01113, MGG_02747, MGG_09894, MGG_12892, MGG_07753, MGG_11862, MGG_01362, MGG_04455, MGG_06657, MGG_06044, MGG_10680, MGG_02953, MGG_08163, MGG_03136, MGG_03135, MGG_06185, MGG_04114, MGG_05237, MGG_05238, MGG_08834, MGG_04484, MGG_02872, MGG_03236, MGG_04444, MGG_06571, MGG_00546, MGG_03653, MGG_03554, MGG_06479, MGG_11505, MGG_04104, MGG_09927, MGG_11785, MGG_04829, MGG_02620, MGG_00221, MGG…	1498	77	4707	2.36684	7.71072e-12	2.57028e-12	2.95541e-11
GOTERM_CC_DIRECT	GO:0005737~cytoplasm	120	3.74065	4.22041e-10	MGG_09902, MGG_06566, MGG_06089, MGG_14472, MGG_11412, MGG_00744, MGG_01567, MGG_10605, MGG_05440, MGG_02811, MGG_14268, MGG_12537, MGG_01205, MGG_02535, MGG_04445, MGG_05815, MGG_06000, MGG_12403, MGG_01349, MGG_08170, MGG_11165, MGG_07333, MGG_03536, MGG_09540, MGG_01689, MGG_06403, MGG_09369, MGG_06304, MGG_12911, MGG_06911, MGG_00559, MGG_16212, MGG_00153, MGG_16901, MGG_14801, MGG_09471, MGG…	1498	234	4707	1.61138	1.51091e-07	3.77727e-08	5.79156e-07
GOTERM_CC_DIRECT	GO:0032040~small-subunit processome	26	0.810474	1.79067e-09	MGG_07465, MGG_03129, MGG_10652, MGG_02467, MGG_03597, MGG_04470, MGG_11360, MGG_06500, MGG_03210, MGG_03271, MGG_16744, MGG_01315, MGG_04995, MGG_07915, MGG_04641, MGG_01000, MGG_07008, MGG_09195, MGG_16248, MGG_08049, MGG_07737, MGG_14748, MGG_04201, MGG_08302, MGG_00977, MGG_08178	1498	29	4707	2.81714	6.4106e-07	1.28212e-07	2.45729e-06
GOTERM_CC_DIRECT	GO:0005634~nucleus	357	11.1284	1.2557e-08	MGG_04108, MGG_01419, MGG_00169, MGG_04311, MGG_06089, MGG_05939, MGG_10504, MGG_14472, MGG_01567, MGG_05936, MGG_09186, MGG_13497, MGG_01414, MGG_01979, MGG_13447, MGG_04446, MGG_04110, MGG_04562, MGG_03561, MGG_04566, MGG_06184, MGG_05303, MGG_03080, MGG_00943, MGG_10212, MGG_01675, MGG_04445, MGG_07437, MGG_03961, MGG_10358, MGG_05817, MGG_12345, MGG_06296, MGG_15739, MGG_01582, MGG_09302, MGG…	1498	895	4707	1.25337	4.4954e-06	7.49235e-07	1.72317e-05
GOTERM_CC_DIRECT	GO:0030687~preribosome, large subunit precursor	19	0.592269	1.83162e-06	MGG_10835, MGG_05146, MGG_17514, MGG_09313, MGG_00178, MGG_08908, MGG_01078, MGG_01183, MGG_06322, MGG_02460, MGG_01561, MGG_02453, MGG_17694, MGG_01292, MGG_07136, MGG_08140, MGG_10160, MGG_07449, MGG_06522	1498	22	4707	2.71371	0.000655507	9.36701e-05	0.00251346
GOTERM_CC_DIRECT	GO:0019013~viral nucleocapsid	17	0.529925	3.49489e-06	MGG_01000, MGG_13209, MGG_04013, MGG_01419, MGG_03556, MGG_03895, MGG_02467, MGG_07258, MGG_09253, MGG_04351, MGG_04741, MGG_01157, MGG_01100, MGG_05999, MGG_04201, MGG_00977, MGG_13500	1498	19	4707	2.81143	0.00125039	0.000156385	0.00479584
GOTERM_CC_DIRECT	GO:0034399~nuclear periphery	17	0.529925	1.23029e-05	MGG_00475, MGG_07711, MGG_04831, MGG_00908, MGG_01013, MGG_03537, MGG_03074, MGG_00744, MGG_04528, MGG_09208, MGG_03668, MGG_02453, MGG_08269, MGG_16706, MGG_08911, MGG_11771, MGG_16711	1498	20	4707	2.67086	0.00439478	0.000489265	0.0168816
GOTERM_CC_DIRECT	GO:0016282~eukaryotic 43S preinitiation complex	14	0.436409	1.72346e-05	MGG_00341, MGG_00789, MGG_01013, MGG_05156, MGG_10653, MGG_16895, MGG_03855, MGG_03317, MGG_10192, MGG_07109, MGG_01595, MGG_01978, MGG_01592, MGG_05266	1498	15	4707	2.93271	0.00615106	0.000616815	0.023648
GOTERM_CC_DIRECT	GO:0033290~eukaryotic 48S preinitiation complex	14	0.436409	6.50414e-05	MGG_00341, MGG_01013, MGG_05156, MGG_10653, MGG_16895, MGG_03855, MGG_03317, MGG_10192, MGG_07109, MGG_13200, MGG_01595, MGG_01978, MGG_01592, MGG_05266	1498	16	4707	2.74942	0.0230165	0.00211463	0.0892176
GOTERM_CC_DIRECT	GO:0072686~mitotic spindle	17	0.529925	9.40922e-05	MGG_01419, MGG_01835, MGG_16761, MGG_02484, MGG_03129, MGG_04430, MGG_02522, MGG_06202, MGG_03597, MGG_05637, MGG_09004, MGG_03210, MGG_00866, MGG_06296, MGG_12123, MGG_01315, MGG_07705	1498	22	4707	2.42806	0.0331255	0.00280328	0.129043
GOTERM_CC_DIRECT	GO:0022625~cytosolic large ribosomal subunit	10	0.311721	0.000234115	MGG_06333, MGG_04467, MGG_06952, MGG_07048, MGG_13782, MGG_07525, MGG_03581, MGG_03193, MGG_05817, MGG_05248	1498	10	4707	3.14219	0.080406	0.00642718	0.320792
GOTERM_CC_DIRECT	GO:0005666~DNA-directed RNA polymerase III complex	11	0.342893	0.000347655	MGG_11667, MGG_09284, MGG_06984, MGG_04477, MGG_03072, MGG_05321, MGG_10446, MGG_09265, MGG_03225, MGG_06083, MGG_06311	1498	12	4707	2.88034	0.117046	0.00885216	0.476024
GOTERM_CC_DIRECT	GO:0030686~90S preribosome	15	0.467581	0.000500314	MGG_04641, MGG_11193, MGG_07008, MGG_06242, MGG_09195, MGG_03129, MGG_02417, MGG_03872, MGG_03597, MGG_05815, MGG_11039, MGG_06500, MGG_07737, MGG_04995, MGG_07915	1498	20	4707	2.35664	0.164025	0.0118728	0.684386
GOTERM_CC_DIRECT	GO:0005736~DNA-directed RNA polymerase I complex	9	0.280549	0.000668093	MGG_11667, MGG_09284, MGG_01158, MGG_06381, MGG_01572, MGG_05321, MGG_06083, MGG_10674, MGG_06311	1498	9	4707	3.14219	0.212788	0.0148423	0.91292
GOTERM_CC_DIRECT	GO:0005832~chaperonin-containing T-complex	8	0.249377	0.0018844	MGG_01979, MGG_00135, MGG_03857, MGG_01582, MGG_03310, MGG_11889, MGG_10358, MGG_06639	1498	8	4707	3.14219	0.490971	0.0389421	2.55514
GOTERM_CC_DIRECT	GO:0022627~cytosolic small ribosomal subunit	9	0.280549	0.00240401	MGG_11776, MGG_16248, MGG_04719, MGG_01013, MGG_03372, MGG_06919, MGG_00349, MGG_08693, MGG_06480	1498	10	4707	2.82797	0.577544	0.0467428	3.24897
GOTERM_CC_DIRECT	GO:0005844~polysome	8	0.249377	0.00614146	MGG_06496, MGG_12123, MGG_03876, MGG_05730, MGG_02572, MGG_07333, MGG_06082, MGG_04566	1498	9	4707	2.79306	0.889796	0.109591	8.10628
GOTERM_CC_DIRECT	GO:0005852~eukaryotic translation initiation factor 3 complex	7	0.218204	0.0153009	MGG_03855, MGG_03317, MGG_10192, MGG_07109, MGG_05156, MGG_01595, MGG_05266	1498	8	4707	2.74942	0.995994	0.241189	19.0706
GOTERM_CC_DIRECT	GO:0030529~intracellular ribonucleoprotein complex	7	0.218204	0.0153009	MGG_13209, MGG_01419, MGG_01100, MGG_05999, MGG_13500, MGG_04351, MGG_01519	1498	8	4707	2.74942	0.995994	0.241189	19.0706
GOTERM_CC_DIRECT	GO:0005654~nucleoplasm	11	0.342893	0.0193105	MGG_02761, MGG_02460, MGG_07737, MGG_09313, MGG_04894, MGG_01561, MGG_16274, MGG_02417, MGG_02970, MGG_08908, MGG_01183	1498	17	4707	2.03318	0.99907	0.282812	23.4774
GOTERM_CC_DIRECT	GO:0005635~nuclear envelope	16	0.498753	0.01998	MGG_15576, MGG_01709, MGG_06459, MGG_01044, MGG_00731, MGG_05314, MGG_09208, MGG_04529, MGG_03026, MGG_03994, MGG_02927, MGG_00170, MGG_06522, MGG_01656, MGG_01059, MGG_10127	1498	29	4707	1.73362	0.999272	0.27994	24.1912
GOTERM_CC_DIRECT	GO:0034515~proteasome storage granule	11	0.342893	0.0312753	MGG_03524, MGG_03211, MGG_08343, MGG_16706, MGG_07130, MGG_04342, MGG_04053, MGG_05991, MGG_00331, MGG_01059, MGG_04529	1498	18	4707	1.92023	0.999989	0.390175	35.3407
GOTERM_CC_DIRECT	GO:0030688~preribosome, small subunit precursor	6	0.187032	0.0369362	MGG_05146, MGG_11193, MGG_07737, MGG_09254, MGG_03872, MGG_04995	1498	7	4707	2.69331	0.999999	0.429589	40.3374
GOTERM_CC_DIRECT	GO:0043614~multi-eIF complex	6	0.187032	0.0369362	MGG_00789, MGG_01013, MGG_13200, MGG_01978, MGG_01592, MGG_16895	1498	7	4707	2.69331	0.999999	0.429589	40.3374
GOTERM_CC_DIRECT	GO:0005643~nuclear pore	10	0.311721	0.0370572	MGG_03377, MGG_05095, MGG_08269, MGG_10698, MGG_04430, MGG_00744, MGG_17732, MGG_06297, MGG_01590, MGG_03668	1498	16	4707	1.96387	0.999999	0.417684	40.4401
GOTERM_CC_DIRECT	GO:0071540~eukaryotic translation initiation factor 3 complex, eIF3e	5	0.15586	0.0380584	MGG_00341, MGG_01013, MGG_10653, MGG_01978, MGG_16895	1498	5	4707	3.14219	0.999999	0.413902	41.2843
GOTERM_CC_DIRECT	GO:0032045~guanyl-nucleotide exchange factor complex	5	0.15586	0.0380584	MGG_02390, MGG_17708, MGG_06077, MGG_03517, MGG_13245	1498	5	4707	3.14219	0.999999	0.413902	41.2843
GOTERM_CC_DIRECT	GO:0005851~eukaryotic translation initiation factor 2B complex	5	0.15586	0.0380584	MGG_02390, MGG_17708, MGG_06077, MGG_03517, MGG_13245	1498	5	4707	3.14219	0.999999	0.413902	41.2843
GOTERM_CC_DIRECT	GO:0071541~eukaryotic translation initiation factor 3 complex, eIF3m	5	0.15586	0.0380584	MGG_00341, MGG_01013, MGG_10653, MGG_01978, MGG_16895	1498	5	4707	3.14219	0.999999	0.413902	41.2843
GOTERM_CC_DIRECT	GO:0005732~small nucleolar ribonucleoprotein complex	6	0.187032	0.0729952	MGG_03895, MGG_07258, MGG_04995, MGG_01509, MGG_07915, MGG_05701	1498	8	4707	2.35664	1	0.633958	64.6593
GOTERM_CC_DIRECT	GO:0005622~intracellular	33	1.02868	0.085273	MGG_08526, MGG_09898, MGG_08689, MGG_07610, MGG_03295, MGG_06319, MGG_10676, MGG_11784, MGG_05332, MGG_00104, MGG_06920, MGG_00211, MGG_01574, MGG_11174, MGG_02479, MGG_00371, MGG_13891, MGG_13157, MGG_13744, MGG_06696, MGG_01227, MGG_02419, MGG_13790, MGG_04667, MGG_04955, MGG_00594, MGG_07173, MGG_06335, MGG_09565, MGG_07617, MGG_01683, MGG_03283, MGG_00345	1498	81	4707	1.28015	1	0.680048	70.5684
GOTERM_CC_DIRECT	GO:0033588~Elongator holoenzyme complex	5	0.15586	0.0855853	MGG_07174, MGG_17701, MGG_05481, MGG_07081, MGG_03979	1498	6	4707	2.61849	1	0.668625	70.706
GOTERM_CC_DIRECT	GO:0042555~MCM complex	5	0.15586	0.0855853	MGG_09293, MGG_17683, MGG_09300, MGG_01759, MGG_08122	1498	6	4707	2.61849	1	0.668625	70.706
GOTERM_CC_DIRECT	GO:0005786~signal recognition particle, endoplasmic reticulum targeting	4	0.124688	0.0978901	MGG_04190, MGG_06904, MGG_03961, MGG_03572	1498	4	4707	3.14219	1	0.70752	75.6759
GOTERM_MF_DIRECT	GO:0003735~structural constituent of ribosome	73	2.27556	2.52195e-06	MGG_02747, MGG_09894, MGG_07753, MGG_12892, MGG_04455, MGG_13782, MGG_06658, MGG_06044, MGG_10370, MGG_10680, MGG_02953, MGG_08163, MGG_02952, MGG_03372, MGG_03136, MGG_03135, MGG_07048, MGG_04114, MGG_06185, MGG_05238, MGG_11776, MGG_05673, MGG_08834, MGG_04484, MGG_06721, MGG_02872, MGG_03236, MGG_04444, MGG_06571, MGG_00546, MGG_06333, MGG_03653, MGG_06952, MGG_00349, MGG_03554, MGG_06479, MGG…	1821	127	4969	1.56848	0.00201553	0.00201553	0.00387114
GOTERM_MF_DIRECT	GO:0003743~translation initiation factor activity	31	0.966334	7.17917e-05	MGG_00341, MGG_17708, MGG_00789, MGG_01013, MGG_05156, MGG_10653, MGG_03517, MGG_11382, MGG_06066, MGG_04941, MGG_13474, MGG_03317, MGG_07109, MGG_12177, MGG_10192, MGG_01595, MGG_04400, MGG_01978, MGG_01592, MGG_02390, MGG_06077, MGG_06509, MGG_04504, MGG_16895, MGG_03855, MGG_08170, MGG_13200, MGG_16739, MGG_05264, MGG_13245, MGG_05266	1821	46	4969	1.83892	0.0558171	0.0283093	0.110144
GOTERM_MF_DIRECT	GO:0003723~RNA binding	64	1.99501	0.000126949	MGG_17514, MGG_05136, MGG_15042, MGG_03895, MGG_01268, MGG_05436, MGG_06658, MGG_06082, MGG_05701, MGG_07089, MGG_10370, MGG_07147, MGG_03372, MGG_00481, MGG_00482, MGG_06522, MGG_04993, MGG_13217, MGG_13527, MGG_05673, MGG_00739, MGG_08049, MGG_06721, MGG_01103, MGG_05810, MGG_04523, MGG_05815, MGG_07433, MGG_08626, MGG_12403, MGG_03388, MGG_01448, MGG_00876, MGG_07718, MGG_07333, MGG_07663, MGG…	1821	118	4969	1.47998	0.0965784	0.0332886	0.19469
GOTERM_MF_DIRECT	GO:0051287~NAD binding	22	0.685786	0.00142234	MGG_00312, MGG_08562, MGG_03051, MGG_05223, MGG_12929, MGG_02690, MGG_03097, MGG_00067, MGG_06539, MGG_06547, MGG_11794, MGG_01566, MGG_01084, MGG_05506, MGG_01182, MGG_07268, MGG_08173, MGG_02084, MGG_01995, MGG_01309, MGG_04034, MGG_01506	1821	33	4969	1.81915	0.679759	0.247738	2.16115
GOTERM_MF_DIRECT	GO:0001054~RNA polymerase I activity	9	0.280549	0.00194957	MGG_11667, MGG_09284, MGG_01158, MGG_06381, MGG_01572, MGG_05321, MGG_06083, MGG_10674, MGG_06311	1821	9	4969	2.72872	0.790111	0.268191	2.95109
GOTERM_MF_DIRECT	GO:0000287~magnesium ion binding	26	0.810474	0.00204083	MGG_09898, MGG_04495, MGG_01566, MGG_01460, MGG_01828, MGG_07148, MGG_02955, MGG_03945, MGG_06868, MGG_10607, MGG_01995, MGG_12154, MGG_07628, MGG_17000, MGG_13157, MGG_05223, MGG_06547, MGG_15527, MGG_07268, MGG_06678, MGG_08063, MGG_14742, MGG_00876, MGG_15739, MGG_06454, MGG_00369	1821	42	4969	1.68921	0.804918	0.238442	3.08723
GOTERM_MF_DIRECT	GO:0030170~pyridoxal phosphate binding	30	0.935162	0.00245533	MGG_00769, MGG_04156, MGG_08189, MGG_17828, MGG_11934, MGG_03494, MGG_07224, MGG_15888, MGG_01819, MGG_03869, MGG_02378, MGG_03940, MGG_02812, MGG_04134, MGG_14904, MGG_07097, MGG_02559, MGG_09919, MGG_00923, MGG_05067, MGG_01662, MGG_10969, MGG_04764, MGG_06503, MGG_03583, MGG_06392, MGG_06950, MGG_07195, MGG_07074, MGG_03264	1821	51	4969	1.60513	0.86008	0.244937	3.70327
GOTERM_MF_DIRECT	GO:0005085~guanyl-nucleotide exchange factor activity	11	0.342893	0.00367184	MGG_02390, MGG_00371, MGG_17708, MGG_06077, MGG_03517, MGG_09535, MGG_11784, MGG_02419, MGG_05662, MGG_13245, MGG_06127	1821	13	4969	2.30892	0.947286	0.307785	5.49019
GOTERM_MF_DIRECT	GO:0030515~snoRNA binding	9	0.280549	0.00660153	MGG_11193, MGG_07465, MGG_03271, MGG_03129, MGG_04201, MGG_00977, MGG_09253, MGG_04995, MGG_04470	1821	10	4969	2.45585	0.995002	0.444978	9.66721
GOTERM_MF_DIRECT	GO:0030234~enzyme regulator activity	9	0.280549	0.00660153	MGG_07120, MGG_17708, MGG_00884, MGG_01104, MGG_09554, MGG_06077, MGG_12117, MGG_05991, MGG_13245	1821	10	4969	2.45585	0.995002	0.444978	9.66721
GOTERM_MF_DIRECT	GO:0003899~DNA-directed RNA polymerase activity	13	0.405237	0.00922231	MGG_04652, MGG_04477, MGG_03072, MGG_04508, MGG_09265, MGG_08694, MGG_03225, MGG_07394, MGG_06677, MGG_06984, MGG_14133, MGG_02463, MGG_10446	1821	18	4969	1.97074	0.999396	0.523462	13.2569
GOTERM_MF_DIRECT	GO:0017056~structural constituent of nuclear pore	8	0.249377	0.0146764	MGG_05095, MGG_08911, MGG_04430, MGG_03074, MGG_00744, MGG_01590, MGG_08590, MGG_06426	1821	9	4969	2.42553	0.999993	0.658799	20.3041
GOTERM_MF_DIRECT	GO:0016279~protein-lysine N-methyltransferase activity	6	0.187032	0.0274047	MGG_01212, MGG_01349, MGG_03526, MGG_16442, MGG_02740, MGG_04887	1821	6	4969	2.72872	1	0.843153	34.7233
GOTERM_MF_DIRECT	GO:0009982~pseudouridine synthase activity	6	0.187032	0.0274047	MGG_08626, MGG_08117, MGG_07518, MGG_16154, MGG_07663, MGG_06481	1821	6	4969	2.72872	1	0.843153	34.7233
GOTERM_MF_DIRECT	GO:0003724~RNA helicase activity	6	0.187032	0.0274047	MGG_03931, MGG_09293, MGG_15042, MGG_17683, MGG_07333, MGG_00523	1821	6	4969	2.72872	1	0.843153	34.7233
GOTERM_MF_DIRECT	GO:0015171~amino acid transmembrane transporter activity	16	0.498753	0.0496031	MGG_11611, MGG_02072, MGG_02899, MGG_07485, MGG_13659, MGG_14115, MGG_01385, MGG_08548, MGG_08670, MGG_03103, MGG_08129, MGG_14937, MGG_15020, MGG_00289, MGG_13334, MGG_05128	1821	28	4969	1.55927	1	0.956317	54.2026
GOTERM_MF_DIRECT	GO:0004843~thiol-dependent ubiquitin-specific protease activity	10	0.311721	0.0558052	MGG_13915, MGG_16706, MGG_05996, MGG_05666, MGG_06319, MGG_11771, MGG_01683, MGG_02970, MGG_11505, MGG_08270	1821	15	4969	1.81915	1	0.962421	58.5815
GOTERM_MF_DIRECT	GO:0000049~tRNA binding	9	0.280549	0.0597599	MGG_04425, MGG_07174, MGG_03220, MGG_03607, MGG_04613, MGG_17596, MGG_06404, MGG_01592, MGG_10127	1821	13	4969	1.88911	1	0.962612	61.1658
GOTERM_MF_DIRECT	GO:0016597~amino acid binding	6	0.187032	0.0670527	MGG_11805, MGG_01104, MGG_01102, MGG_01537, MGG_11794, MGG_08008	1821	7	4969	2.3389	1	0.968893	65.5407
GOTERM_MF_DIRECT	GO:0050661~NADP binding	17	0.529925	0.0837605	MGG_04144, MGG_01747, MGG_03051, MGG_08187, MGG_11682, MGG_01084, MGG_12749, MGG_04751, MGG_07937, MGG_07887, MGG_13110, MGG_08975, MGG_07539, MGG_03330, MGG_11450, MGG_00175, MGG_12996	1821	32	4969	1.44963	1	0.9837	73.8882
GOTERM_MF_DIRECT	GO:0010181~FMN binding	17	0.529925	0.0837605	MGG_04144, MGG_01747, MGG_09031, MGG_10583, MGG_06096, MGG_10497, MGG_10879, MGG_03823, MGG_01569, MGG_17472, MGG_01723, MGG_01297, MGG_04962, MGG_07187, MGG_01535, MGG_02758, MGG_07708	1821	32	4969	1.44963	1	0.9837	73.8882
GOTERM_MF_DIRECT	GO:0004298~threonine-type endopeptidase activity	9	0.280549	0.0956983	MGG_08343, MGG_00170, MGG_04622, MGG_07130, MGG_01153, MGG_04053, MGG_00331, MGG_04529, MGG_04551	1821	14	4969	1.75418	1	0.988561	78.6495
