# Supplementary material for: Transcriptome and Quasi-Targeted Metabolome Analyze Overexpression of 4-Hydroxyphenylpyruvate Dioxygenase Alleviates Fungal Toxicity of 9-Phenanthrol in Magnaporthe oryzae
Source: Int J Mol Sci. 2022 Jun 27;23(13):7116. doi: 10.3390/ijms23137116 (PMC9266922; doi:10.3390/ijms23137116)
Supplement: Supplementary file 1 [file ijms-23-07116-s001.zip › Table S4.xlsx]

## Sheet: Sheet1
Table S4. The KEGG analysis of upregulated genes in M. oryzae with 9-phenanthrol.
Category	Term	Count	%	PValue	Genes	List Total	Pop Hits	Pop Total	Fold Enrichment	Bonferroni	Benjamini	FDR
KEGG_PATHWAY	mgr04144:Endocytosis	30	0.967118	2.06725e-05	MGG_01765, MGG_01745, MGG_04174, MGG_00455, MGG_06135, MGG_07768, MGG_00833, MGG_01079, MGG_07255, MGG_12336, MGG_08144, MGG_11497, MGG_09493, MGG_06572, MGG_01597, MGG_06649, MGG_04957, MGG_05528, MGG_02515, MGG_04958, MGG_01185, MGG_06241, MGG_04954, MGG_02948, MGG_04438, MGG_06670, MGG_04095, MGG_10448, MGG_04616, MGG_14173	389	65	1793	2.12735	0.00214765	0.00214765	0.0231121
KEGG_PATHWAY	mgr04130:SNARE interactions in vesicular transport	10	0.322373	0.000673143	MGG_01600, MGG_04050, MGG_06883, MGG_04454, MGG_05428, MGG_04090, MGG_06125, MGG_07189, MGG_12614, MGG_02920	389	14	1793	3.29232	0.0676346	0.0344093	0.750085
KEGG_PATHWAY	mgr00190:Oxidative phosphorylation	25	0.805932	0.0107709	MGG_01135, MGG_01706, MGG_12387, MGG_17901, MGG_11431, MGG_04969, MGG_03226, MGG_04772, MGG_00892, MGG_09281, MGG_10604, MGG_06108, MGG_09916, MGG_03188, MGG_05944, MGG_03484, MGG_03185, MGG_04999, MGG_12467, MGG_16462, MGG_03930, MGG_06003, MGG_01111, MGG_01305, MGG_06192	389	71	1793	1.62298	0.675753	0.312997	11.4042
KEGG_PATHWAY	mgr00860:Porphyrin and chlorophyll metabolism	10	0.322373	0.0109464	MGG_15723, MGG_09748, MGG_05275, MGG_05944, MGG_05607, MGG_01061, MGG_04969, MGG_02435, MGG_06446, MGG_06058	389	19	1793	2.42592	0.681681	0.248869	11.5798
KEGG_PATHWAY	mgr04141:Protein processing in endoplasmic reticulum	26	0.838169	0.0113269	MGG_08035, MGG_09977, MGG_11408, MGG_02742, MGG_04978, MGG_05685, MGG_05753, MGG_06786, MGG_06648, MGG_05320, MGG_04856, MGG_15988, MGG_03598, MGG_09205, MGG_02446, MGG_13508, MGG_14071, MGG_08164, MGG_06362, MGG_03907, MGG_02503, MGG_03565, MGG_06172, MGG_01318, MGG_06175, MGG_07502	389	75	1793	1.59787	0.694168	0.210964	11.9594
KEGG_PATHWAY	mgr04120:Ubiquitin mediated proteolysis	20	0.644745	0.0213574	MGG_08035, MGG_09977, MGG_09504, MGG_09913, MGG_04978, MGG_06733, MGG_08345, MGG_00261, MGG_02568, MGG_09696, MGG_09205, MGG_02446, MGG_07255, MGG_14071, MGG_04088, MGG_14266, MGG_06372, MGG_13435, MGG_04724, MGG_00970	389	56	1793	1.64616	0.894097	0.312164	21.4465
KEGG_PATHWAY	mgr00600:Sphingolipid metabolism	10	0.322373	0.0230517	MGG_00864, MGG_14602, MGG_05147, MGG_05197, MGG_07051, MGG_07162, MGG_10308, MGG_05189, MGG_06250, MGG_10668	389	21	1793	2.19488	0.911561	0.292835	22.9538
KEGG_PATHWAY	mgr03060:Protein export	9	0.290135	0.0251076	MGG_02742, MGG_04884, MGG_02503, MGG_11330, MGG_06172, MGG_05320, MGG_07383, MGG_04856, MGG_02663	389	18	1793	2.30463	0.928961	0.281483	24.7473
KEGG_PATHWAY	mgr00100:Steroid biosynthesis	9	0.290135	0.0637088	MGG_02465, MGG_10860, MGG_15431, MGG_04628, MGG_11399, MGG_06047, MGG_08624, MGG_06765, MGG_04346	389	21	1793	1.97539	0.998937	0.532655	52.0997
KEGG_PATHWAY	mgr00900:Terpenoid backbone biosynthesis	8	0.257898	0.0950699	MGG_16219, MGG_00758, MGG_08854, MGG_06951, MGG_03858, MGG_03343, MGG_05812, MGG_04560	389	19	1793	1.94074	0.999969	0.646168	67.2734
KEGG_PATHWAY	mgr00564:Glycerophospholipid metabolism	13	0.419084	0.0992467	MGG_07543, MGG_08856, MGG_08368, MGG_09371, MGG_08851, MGG_02416, MGG_07287, MGG_06157, MGG_04664, MGG_12983, MGG_09486, MGG_07037, MGG_01311	389	38	1793	1.57685	0.999981	0.627763	68.9232
