# Supplementary material for: Transcriptome and Quasi-Targeted Metabolome Analyze Overexpression of 4-Hydroxyphenylpyruvate Dioxygenase Alleviates Fungal Toxicity of 9-Phenanthrol in Magnaporthe oryzae
Source: Int J Mol Sci. 2022 Jun 27;23(13):7116. doi: 10.3390/ijms23137116 (PMC9266922; doi:10.3390/ijms23137116)
Supplement: Supplementary file 1 [file ijms-23-07116-s001.zip › Table S5.xlsx]

## Sheet: Sheet1
Table S5. The KEGG analysis of downregulated genes in M. oryzae with 9-phenanthrol.
Category	Term	Count	%	PValue	Genes	List Total	Pop Hits	Pop Total	Fold Enrichment	Bonferroni	Benjamini	FDR
KEGG_PATHWAY	mgr01230:Biosynthesis of amino acids	97	3.02369	1.46757e-15	MGG_06425, MGG_02690, MGG_01566, MGG_11934, MGG_07756, MGG_01359, MGG_07148, MGG_00534, MGG_03945, MGG_10607, MGG_03661, MGG_04113, MGG_09919, MGG_00942, MGG_12805, MGG_00253, MGG_00016, MGG_02538, MGG_15527, MGG_06950, MGG_06376, MGG_04059, MGG_07528, MGG_10852, MGG_10854, MGG_03051, MGG_02624, MGG_07224, MGG_14904, MGG_02617, MGG_17041, MGG_11794, MGG_02611, MGG_05063, MGG_13485, MGG_05168, MGG…	863	116	1793	1.73733	1.61648e-13	1.61648e-13	1.63203e-12
KEGG_PATHWAY	mgr01130:Biosynthesis of antibiotics	153	4.76933	7.42627e-13	MGG_00168, MGG_00167, MGG_06561, MGG_09427, MGG_02690, MGG_04311, MGG_01566, MGG_11934, MGG_08661, MGG_01359, MGG_07148, MGG_03945, MGG_00534, MGG_06011, MGG_04449, MGG_04446, MGG_10607, MGG_03661, MGG_01026, MGG_00175, MGG_12537, MGG_04113, MGG_15038, MGG_09919, MGG_00942, MGG_09512, MGG_03645, MGG_06957, MGG_00016, MGG_05630, MGG_04876, MGG_13499, MGG_03853, MGG_04435, MGG_06950, MGG_11343, MGG…	863	215	1793	1.4785	8.31744e-11	4.15872e-11	8.41827e-10
KEGG_PATHWAY	mgr01110:Biosynthesis of secondary metabolites	202	6.29676	7.85139e-12	MGG_00168, MGG_00167, MGG_02690, MGG_05936, MGG_01569, MGG_05804, MGG_07148, MGG_03945, MGG_00534, MGG_04449, MGG_10607, MGG_04446, MGG_01026, MGG_00175, MGG_04113, MGG_03186, MGG_00942, MGG_12738, MGG_06957, MGG_03645, MGG_00016, MGG_13499, MGG_04435, MGG_11343, MGG_06376, MGG_07528, MGG_04574, MGG_03051, MGG_04229, MGG_02525, MGG_03699, MGG_04432, MGG_07224, MGG_01819, MGG_06169, MGG_03683, MGG…	863	306	1793	1.37151	8.79355e-10	2.93118e-10	8.90016e-09
KEGG_PATHWAY	mgr03010:Ribosome	78	2.43142	2.09617e-07	MGG_02747, MGG_01113, MGG_09894, MGG_07753, MGG_12892, MGG_04455, MGG_13782, MGG_06658, MGG_06657, MGG_06044, MGG_10370, MGG_10680, MGG_02953, MGG_08163, MGG_02952, MGG_03372, MGG_03136, MGG_03135, MGG_07048, MGG_04114, MGG_06185, MGG_05237, MGG_05238, MGG_11776, MGG_05673, MGG_08834, MGG_04484, MGG_06721, MGG_02872, MGG_03236, MGG_04444, MGG_06571, MGG_00546, MGG_06333, MGG_03653, MGG_06952, MGG…	863	107	1793	1.51454	2.34768e-05	5.86926e-06	0.000237617
KEGG_PATHWAY	mgr03008:Ribosome biogenesis in eukaryotes	54	1.68329	2.74763e-07	MGG_17514, MGG_09952, MGG_03129, MGG_03556, MGG_13203, MGG_09996, MGG_04746, MGG_03271, MGG_13447, MGG_03270, MGG_04995, MGG_07008, MGG_15523, MGG_06202, MGG_06948, MGG_05817, MGG_12403, MGG_06856, MGG_07136, MGG_05999, MGG_04201, MGG_00977, MGG_08178, MGG_00446, MGG_06379, MGG_07465, MGG_08840, MGG_07518, MGG_04430, MGG_02526, MGG_02467, MGG_07258, MGG_00764, MGG_08924, MGG_03597, MGG_05662, MGG…	863	68	1793	1.64989	3.0773e-05	6.15468e-06	0.000311466
KEGG_PATHWAY	mgr01200:Carbon metabolism	74	2.30673	6.41038e-07	MGG_01728, MGG_00168, MGG_00167, MGG_08562, MGG_04156, MGG_09856, MGG_17828, MGG_07756, MGG_08905, MGG_08661, MGG_01828, MGG_07148, MGG_04895, MGG_03521, MGG_00534, MGG_06011, MGG_04446, MGG_10607, MGG_03661, MGG_06466, MGG_09289, MGG_10076, MGG_07702, MGG_00175, MGG_07202, MGG_04113, MGG_04014, MGG_00901, MGG_15038, MGG_01084, MGG_04876, MGG_08173, MGG_13499, MGG_03041, MGG_06678, MGG_08171, MGG…	863	102	1793	1.5073	7.17937e-05	1.1966e-05	0.000726664
KEGG_PATHWAY	mgr01100:Metabolic pathways	396	12.3441	2.54059e-05	MGG_00168, MGG_00167, MGG_04311, MGG_07545, MGG_14472, MGG_01176, MGG_01566, MGG_03945, MGG_01572, MGG_04449, MGG_10607, MGG_04446, MGG_03661, MGG_01026, MGG_07539, MGG_00175, MGG_04045, MGG_04113, MGG_00943, MGG_00942, MGG_03645, MGG_00016, MGG_03648, MGG_04435, MGG_02921, MGG_04059, MGG_07528, MGG_10805, MGG_17439, MGG_04229, MGG_04432, MGG_07224, MGG_07222, MGG_03683, MGG_14348, MGG_09471, MGG…	863	733	1793	1.12243	0.00284145	0.000406417	0.0287958
KEGG_PATHWAY	mgr00230:Purine metabolism	58	1.80798	8.41912e-05	MGG_09898, MGG_04652, MGG_04495, MGG_03072, MGG_07080, MGG_01256, MGG_03225, MGG_10674, MGG_06083, MGG_01828, MGG_08622, MGG_09284, MGG_07148, MGG_13308, MGG_01572, MGG_12537, MGG_15034, MGG_12738, MGG_11871, MGG_03645, MGG_06764, MGG_00881, MGG_01873, MGG_05630, MGG_06678, MGG_04435, MGG_11343, MGG_00706, MGG_10446, MGG_11541, MGG_10697, MGG_00919, MGG_04477, MGG_13813, MGG_03699, MGG_06911, MGG…	863	83	1793	1.45184	0.00938549	0.00117803	0.0953959
KEGG_PATHWAY	mgr01210:2-Oxocarboxylic acid metabolism	29	0.90399	9.40559e-05	MGG_02125, MGG_03051, MGG_01092, MGG_15774, MGG_01139, MGG_02690, MGG_04156, MGG_04842, MGG_01566, MGG_11934, MGG_03521, MGG_03945, MGG_06868, MGG_01995, MGG_04210, MGG_07202, MGG_02617, MGG_05223, MGG_01104, MGG_09919, MGG_00942, MGG_05345, MGG_13485, MGG_01553, MGG_06503, MGG_07268, MGG_11805, MGG_08584, MGG_02489	863	35	1793	1.72147	0.0104795	0.00116984	0.106568
KEGG_PATHWAY	mgr00240:Pyrimidine metabolism	43	1.3404	0.000396676	MGG_10697, MGG_04652, MGG_17439, MGG_01743, MGG_04477, MGG_07080, MGG_03072, MGG_07298, MGG_07545, MGG_06915, MGG_03225, MGG_10674, MGG_06083, MGG_05660, MGG_08622, MGG_07394, MGG_09284, MGG_07222, MGG_06381, MGG_01572, MGG_08814, MGG_14801, MGG_05252, MGG_12634, MGG_07263, MGG_12098, MGG_05321, MGG_04508, MGG_12159, MGG_00881, MGG_06311, MGG_02459, MGG_04503, MGG_11667, MGG_06984, MGG_01158, MGG…	863	60	1793	1.48897	0.0434637	0.00443379	0.448742
KEGG_PATHWAY	mgr00680:Methane metabolism	21	0.654613	0.00102739	MGG_04014, MGG_00901, MGG_13157, MGG_03096, MGG_00923, MGG_11794, MGG_09856, MGG_03201, MGG_02525, MGG_03095, MGG_05317, MGG_06011, MGG_02967, MGG_00223, MGG_10607, MGG_03661, MGG_04059, MGG_04034, MGG_04590, MGG_13895, MGG_08895	863	25	1793	1.74521	0.108746	0.0104115	1.15846
KEGG_PATHWAY	mgr00250:Alanine, aspartate and glutamate metabolism	22	0.685786	0.00148345	MGG_17000, MGG_01743, MGG_04156, MGG_01662, MGG_04229, MGG_02525, MGG_03645, MGG_02538, MGG_00969, MGG_06503, MGG_04503, MGG_08074, MGG_03869, MGG_15868, MGG_07187, MGG_01230, MGG_02378, MGG_01537, MGG_17278, MGG_17513, MGG_05247, MGG_04618	863	27	1793	1.69289	0.153183	0.0137603	1.66878
KEGG_PATHWAY	mgr00280:Valine, leucine and isoleucine degradation	23	0.716958	0.00202299	MGG_01755, MGG_02125, MGG_10320, MGG_03097, MGG_03335, MGG_00942, MGG_11480, MGG_01662, MGG_09512, MGG_13647, MGG_08661, MGG_13499, MGG_09181, MGG_03840, MGG_02541, MGG_04449, MGG_02540, MGG_01026, MGG_03900, MGG_02489, MGG_05196, MGG_01606, MGG_12868	863	29	1793	1.64778	0.202923	0.0172952	2.2694
KEGG_PATHWAY	mgr03013:RNA transport	58	1.80798	0.00203418	MGG_09952, MGG_00341, MGG_00789, MGG_01013, MGG_03894, MGG_03074, MGG_03517, MGG_04941, MGG_03317, MGG_08911, MGG_01978, MGG_10127, MGG_05303, MGG_04831, MGG_01248, MGG_00946, MGG_06948, MGG_05817, MGG_16895, MGG_00594, MGG_06859, MGG_08170, MGG_06296, MGG_12123, MGG_06856, MGG_00976, MGG_02580, MGG_10588, MGG_06426, MGG_17708, MGG_09505, MGG_10698, MGG_05156, MGG_04430, MGG_02526, MGG_10653, MGG…	863	90	1793	1.33892	0.203924	0.016158	2.28181
KEGG_PATHWAY	mgr00260:Glycine, serine and threonine metabolism	28	0.872818	0.00320872	MGG_15019, MGG_03051, MGG_08011, MGG_04826, MGG_02525, MGG_17828, MGG_08923, MGG_07224, MGG_03661, MGG_09550, MGG_03332, MGG_00779, MGG_00901, MGG_15038, MGG_00923, MGG_11794, MGG_07384, MGG_12805, MGG_11805, MGG_02967, MGG_04861, MGG_06950, MGG_04059, MGG_10751, MGG_07076, MGG_11389, MGG_11450, MGG_13291	863	38	1793	1.53089	0.302292	0.0237113	3.57762
KEGG_PATHWAY	mgr00400:Phenylalanine, tyrosine and tryptophan biosynthesis	17	0.529925	0.00344483	MGG_06425, MGG_09919, MGG_04156, MGG_01128, MGG_05734, MGG_12805, MGG_00016, MGG_05168, MGG_01710, MGG_05276, MGG_07782, MGG_12760, MGG_01438, MGG_03281, MGG_08596, MGG_14904, MGG_09766	863	20	1793	1.76599	0.320561	0.0238661	3.83621
KEGG_PATHWAY	mgr00650:Butanoate metabolism	17	0.529925	0.00344483	MGG_01755, MGG_01104, MGG_11480, MGG_01662, MGG_09715, MGG_16630, MGG_04076, MGG_13499, MGG_09181, MGG_03945, MGG_03869, MGG_01230, MGG_02378, MGG_06868, MGG_01026, MGG_05196, MGG_12868	863	20	1793	1.76599	0.320561	0.0238661	3.83621
KEGG_PATHWAY	mgr00290:Valine, leucine and isoleucine biosynthesis	15	0.467581	0.00390786	MGG_02125, MGG_05223, MGG_01139, MGG_01104, MGG_15774, MGG_00942, MGG_05345, MGG_17828, MGG_13485, MGG_01553, MGG_07224, MGG_03945, MGG_06950, MGG_06868, MGG_02489	863	17	1793	1.83321	0.355021	0.0254665	4.34148
KEGG_PATHWAY	mgr00030:Pentose phosphate pathway	19	0.592269	0.00651528	MGG_12822, MGG_10148, MGG_04495, MGG_03096, MGG_06089, MGG_01828, MGG_02624, MGG_07148, MGG_06678, MGG_00534, MGG_02471, MGG_07884, MGG_04446, MGG_00223, MGG_10076, MGG_00175, MGG_13895, MGG_08895, MGG_04113	863	24	1793	1.6448	0.519102	0.0398562	7.14188
KEGG_PATHWAY	mgr03020:RNA polymerase	20	0.623441	0.00827323	MGG_10697, MGG_04652, MGG_04477, MGG_03072, MGG_07080, MGG_05321, MGG_04508, MGG_03225, MGG_06083, MGG_10674, MGG_06311, MGG_07394, MGG_11667, MGG_09284, MGG_06984, MGG_01158, MGG_06381, MGG_01572, MGG_02463, MGG_10446	863	26	1793	1.59818	0.605626	0.0477916	8.98753
KEGG_PATHWAY	mgr00300:Lysine biosynthesis	11	0.342893	0.0136132	MGG_01359, MGG_11805, MGG_03051, MGG_01092, MGG_09919, MGG_17041, MGG_04842, MGG_02611, MGG_08584, MGG_01566, MGG_11450	863	12	1793	1.9045	0.784576	0.0738855	14.3907
KEGG_PATHWAY	mgr00220:Arginine biosynthesis	13	0.405237	0.051516	MGG_08074, MGG_10854, MGG_15868, MGG_02690, MGG_04156, MGG_01102, MGG_01324, MGG_17278, MGG_11934, MGG_04210, MGG_02538, MGG_05247, MGG_06503	863	17	1793	1.58878	0.997325	0.245788	45.0944
KEGG_PATHWAY	mgr00350:Tyrosine metabolism	18	0.561097	0.0564506	MGG_15019, MGG_00317, MGG_09919, MGG_04156, MGG_06691, MGG_03880, MGG_01270, MGG_06169, MGG_06011, MGG_01230, MGG_05008, MGG_08455, MGG_10585, MGG_00431, MGG_10751, MGG_03332, MGG_14904, MGG_13291	863	26	1793	1.43836	0.998508	0.256075	48.2468
KEGG_PATHWAY	mgr00010:Glycolysis / Gluconeogenesis	25	0.779302	0.0616784	MGG_12822, MGG_00901, MGG_04495, MGG_03096, MGG_03201, MGG_00220, MGG_01084, MGG_05063, MGG_03880, MGG_08905, MGG_03041, MGG_08063, MGG_10453, MGG_06011, MGG_02967, MGG_03853, MGG_05008, MGG_08597, MGG_10607, MGG_00223, MGG_03900, MGG_04590, MGG_09289, MGG_13895, MGG_08895	863	39	1793	1.33182	0.999199	0.26656	51.4058
KEGG_PATHWAY	mgr00052:Galactose metabolism	16	0.498753	0.0737351	MGG_08012, MGG_05785, MGG_05890, MGG_11289, MGG_04495, MGG_07935, MGG_10662, MGG_13801, MGG_03041, MGG_02368, MGG_03853, MGG_05440, MGG_05098, MGG_02507, MGG_09289, MGG_01631	863	23	1793	1.44531	0.999812	0.300538	58.0321
KEGG_PATHWAY	mgr00330:Arginine and proline metabolism	16	0.498753	0.0737351	MGG_10854, MGG_08011, MGG_04156, MGG_03462, MGG_06392, MGG_00671, MGG_02441, MGG_14297, MGG_10533, MGG_03900, MGG_06376, MGG_11574, MGG_00481, MGG_17513, MGG_12996, MGG_06197	863	23	1793	1.44531	0.999812	0.300538	58.0321
KEGG_PATHWAY	mgr00410:beta-Alanine metabolism	13	0.405237	0.0882179	MGG_03869, MGG_15019, MGG_02378, MGG_05008, MGG_01662, MGG_03900, MGG_01606, MGG_03332, MGG_10751, MGG_08661, MGG_12868, MGG_06197, MGG_13291	863	18	1793	1.50051	0.999968	0.338832	64.8979
