# Supplementary material for: Transcriptome and Quasi-Targeted Metabolome Analyze Overexpression of 4-Hydroxyphenylpyruvate Dioxygenase Alleviates Fungal Toxicity of 9-Phenanthrol in Magnaporthe oryzae
Source: Int J Mol Sci. 2022 Jun 27;23(13):7116. doi: 10.3390/ijms23137116 (PMC9266922; doi:10.3390/ijms23137116)
Supplement: Supplementary file 1 [file ijms-23-07116-s001.zip › Table S6.xlsx]

## Sheet: Sheet2
Table S6. The expressions of pathogenicity related genes with 9-phenanthrol in M. oryzae
ID	foldchange	description
MGG_02531	-4.24153	minor extracellular protease vpr
MGG_10105	-3.1263	hypothetical protein
MGG_07626	-2.38505	cytochrome P450 monooxygenase
MGG_01662	-2.18909	4-aminobutyrate aminotransferase
MGG_07187	-1.91107	glutamate synthase
MGG_01230	-1.52398	succinate-semialdehyde dehydrogenase
MGG_04337	-1.44459	catalase-peroxidase 1
MGG_01730	-1.33339	hypothetical protein
MGG_01730	-1.33339	hypothetical protein
MGG_03208	-1.32713	glycolipid-anchored surface protein 5
MGG_03729	-1.21278	CAMK/CAMKL/CHK1 protein kinase
MGG_04719	-1.10691	guanine nucleotide-binding protein subunit beta-like protein
MGG_04100	-1.07419	STE/STE11/CDC15 protein kinase
MGG_00345	-0.880449	AGC protein kinase
MGG_11513	-0.852837	heat shock protein SSB1
MGG_05959	-0.849259	bZIP transcription factor HapX
MGG_08908	-0.846768	mRNA turnover protein 4
MGG_00750	-0.765285	cytochrome b-245 heavychain subunit beta
MGG_03699	-0.76314	inosine-5'-monophosphate dehydrogenase IMD4
MGG_14561	-0.749118	regulatory protein Cys-3
MGG_01569	-0.748519	minor allergen Alt a 7
MGG_02842	-0.745212	hsp70-like protein
MGG_00597	-0.730995	Hsk1-interacting molecule 1
MGG_02378	-0.719956	glutamate decarboxylase
MGG_09898	-0.704712	adenylate cyclase
MGG_04145	-0.69862	chitin synthase 2
MGG_03147	-0.673212	glycerol-3-phosphate dehydrogenase
MGG_04432	-0.661005	cytochrome P450 51
MGG_00682	-0.657045	cyclin-dependent kinase regulatory subunit
MGG_12154	-0.629282	fatty acid synthase subunit alpha
MGG_08689	-0.608599	AGC/PKC protein kinase
MGG_05344	-0.603177	SnodProt1
MGG_04456	-0.596034	zinc finger protein 664
MGG_12749	-0.589481	glutathione reductase
MGG_03314	-0.561598	hypothetical protein
MGG_04118	-0.540684	fatty acid synthase beta subunit dehydratase
MGG_07317	-0.511083	glutamate-cysteine ligase
MGG_07074	-0.505936	cystathionine beta-lyase
MGG_01362	-0.505906	CMGC/CDK/CDC2 protein kinase
MGG_05738	-0.494138	paxillin
MGG_09834	-0.455486	catalase-peroxidase 2
MGG_05646	-0.449345	G2/mitotic-specific cyclin-B
MGG_05969	-0.414824	hypothetical protein
MGG_06454	-0.407131	glutathione synthetase large subunit
MGG_00803	-0.401665	CAMK/CAMKL/AMPK protein kinase
MGG_03060	-0.400473	myosin type II heavy chain
MGG_11712	-0.396926	hypothetical protein
MGG_11712	-0.396926	hypothetical protein
MGG_06065	-0.396674	hsp88-like protein
MGG_10193	-0.38055	guanine nucleotide-binding protein subunit gamma
MGG_01434	-0.377452	vacuolar protein sorting-associated protein 17
MGG_01285	-0.353095	C6 finger domain-containing protein
MGG_01760	-0.295167	exocyst complex protein EXO70
MGG_11201	-0.291539	DNA-binding protein creA
MGG_00067	-0.290249	glycerol-3-phosphate dehydrogenase
MGG_09700	-0.288317	tyrosine-protein phosphatase YVH1
MGG_09263	-0.271134	hypothetical protein
MGG_07437	-0.266195	hypothetical protein
MGG_07437	-0.266195	hypothetical protein
MGG_05280	-0.251468	NADPH oxidase regulator NoxR
MGG_09565	-0.244318	CMGC/MAPK/ERK protein kinase
MGG_00971	-0.233763	hypothetical protein
MGG_00884	-0.210566	26S proteasome non-ATPase regulatory subunit 3
MGG_06726	-0.190223	septin like spn2
MGG_06726	-0.190223	septin like spn2
MGG_02696	-0.172114	woronin body major protein
MGG_06958	-0.168328	hsp70-like protein
MGG_00908	-0.145501	26S protease regulatory subunit 6B
MGG_04943	-0.141347	CMGC/MAPK protein kinase
MGG_01822	-0.117766	CMGC/MAPK/P38 protein kinase
MGG_01581	0.140983	26S protease regulatory subunit 7
MGG_04853	0.183991	homeoprotein
MGG_04853	0.183991	homeoprotein
MGG_09912	0.190534	CAMK/CAMK1 protein kinase
MGG_13013	0.195371	chitin synthase 8
MGG_09962	0.198057	chitin synthase 4, variant
MGG_03123	0.200425	MATE efflux family protein subfamily
MGG_04204	0.22014	guanine nucleotide-binding protein alpha-2 subunit
MGG_06564	0.223524	cAMP-independent regulatory protein pac2
MGG_01521	0.232461	cell division control protein 3
MGG_03677	0.253705	histone acetyltransferase GCN5
MGG_03159	0.265073	YdiU domain-containing protein
MGG_00692	0.282572	cell pattern formation-associated protein stuA
MGG_00692	0.282572	cell pattern formation-associated protein stuA
MGG_06722	0.286875	1,3-beta-glucanosyltransferase gel2
MGG_13014	0.30278	class V chitin synthase
MGG_04186	0.30445	rho GTPase activator Rga
MGG_06075	0.305702	mitochondria fission 1 protein
MGG_06198	0.324303	hypothetical protein
MGG_03670	0.324979	subtilisin-like proteinase Spm1
MGG_07312	0.35718	osmosensing histidine protein kinase SLN1
MGG_06971	0.366521	flocculation suppression protein
MGG_07536	0.374605	vacuolar aminopeptidase 1
MGG_09956	0.403294	PRO41 protein
MGG_05201	0.405469	guanine nucleotide-binding protein subunit beta
MGG_04790	0.406547	CAMK/RAD53 protein kinase
MGG_01185	0.412989	GTP-binding protein ypt5
MGG_05269	0.414366	G protein-coupled receptor
MGG_03198	0.421713	hypothetical protein
MGG_05664	0.42447	cAMP-specific 3',5'-cyclic phosphodiesterase 7B
MGG_05287	0.433915	hypothetical protein
MGG_06898	0.439127	MYB-1
MGG_06285	0.459556	hypothetical protein
MGG_06285	0.459556	hypothetical protein
MGG_05755	0.4685	vacuolar fusion protein mon-1
MGG_08370	0.472931	1,3-beta-glucanosyltransferase gel3
MGG_01818	0.474706	guanine nucleotide-binding protein alpha-3 subunit
MGG_03681	0.476532	ER lumen protein retaining receptor
MGG_08829	0.5267	transcriptional repressor rco-1
MGG_04545	0.53589	cytochrome c peroxidase
MGG_00506	0.539067	hypothetical protein
MGG_10150	0.556256	pH-response transcription factor pacC/RIM101
MGG_05677	0.588189	glutathione S-transferase I
MGG_02503	0.592205	glucose-regulated protein
MGG_06424	0.599775	peroxisomal biogenesis factor 3
MGG_06393	0.644676	ULK/ULK protein kinase
MGG_12939	0.667364	hypothetical protein
MGG_12614	0.681333	hypothetical protein
MGG_11861	0.685139	1,3-beta-glucanosyltransferase gel4
MGG_14966	0.689864	hypothetical protein
MGG_14966	0.689864	hypothetical protein
MGG_01282	0.757964	polyubiquitin
MGG_01282	0.757964	polyubiquitin
MGG_09312	0.784476	hypothetical protein
MGG_01215	0.79357	hypothetical protein
MGG_02897	0.812268	hypothetical protein
MGG_00111	0.857507	phospholipid-transporting ATPase 1
MGG_04191	0.876261	hsp70-like protein
MGG_05367	0.886395	glutathione transferase omega-1
MGG_04732	0.910664	acidic mammalian chitinase
MGG_15291	0.920917	pheromone processing endoprotease KexB
MGG_03817	0.96318	metalloprotease 1
MGG_09551	1.01164	chitin synthase 3
MGG_01943	1.11144	cutinase
MGG_04090	1.12569	SNARE protein
MGG_08774	1.20351	chitin deacetylase
MGG_06648	1.26998	hypothetical protein
MGG_01802	1.29931	chitin synthase 1
MGG_09134	1.44552	hypothetical protein
MGG_12865	1.48497	hypothetical protein
MGG_12865	1.48497	hypothetical protein
MGG_00184	1.71153	hypothetical protein
MGG_00184	1.71153	hypothetical protein
MGG_00184	1.71153	hypothetical protein
MGG_05133	1.73967	hypothetical protein
MGG_03977	1.89051	hypothetical protein
MGG_03977	1.89051	hypothetical protein
MGG_09139	1.92132	laccase-1
MGG_13239	2.0297	linoleate diol synthase
MGG_05059	2.50903	scytalone dehydratase
MGG_02252	2.66192	tetrahydroxynaphthalene reductase
MGG_15142	3.33289	hypothetical protein
MGG_13464	3.56675	laccase
MGG_04628	3.5981	cytochrome P450 51
MGG_11608	3.87127	laccase-2
MGG_10422	4.36135	hypothetical protein
MGG_07215	4.59626	transcription factor Cmr1
MGG_07219	4.8078	conidial yellow pigment biosynthesis polyketide synthase
MGG_10910	5.12846	aflatoxin biosynthesis ketoreductase nor-1
