# Supplementary material for: Transcriptome and Quasi-Targeted Metabolome Analyze Overexpression of 4-Hydroxyphenylpyruvate Dioxygenase Alleviates Fungal Toxicity of 9-Phenanthrol in Magnaporthe oryzae
Source: Int J Mol Sci. 2022 Jun 27;23(13):7116. doi: 10.3390/ijms23137116 (PMC9266922; doi:10.3390/ijms23137116)
Supplement: Supplementary file 1 [file ijms-23-07116-s001.zip › Table S7.xls]

Table S7. The metabolome results in M. oryzae with 9-phenanthrol treatment.
Compound_ID	Name	RT [min]	Formula	Molecular Weight	Class(English)	CAS	all_tre_1	all_tre_2	all_tre_3	all_con_1	all_con_2	all_con_3	FC	log2FC	Pvalue	ROC	VIP
Com_100_neg	4-Hydroxy-3-methylbenzoic acid	6.597	C8H8O3	152.15	Benzoic Acid And Its Derivatives	"499-76-3"	177700	171800	213800	273300	770330	1096000	0.263269818	-1.92538596	0.100487019	1	1.338377028
Com_101_neg	L-Lactic acid	1.487	C3H6O3	90.08	Organic Acid And Its Derivatives	"79-33-4"	1018000	1042000	1035000	641700	22100	106600	4.017393562	2.006259801	0.152640813	1	1.215429767
Com_102_neg	L-Malate	1.089	C4H6O5	134.09	Tca Cycle	"97-67-6"	301300000	239300000	328900000	49830000	892700	113000000	5.310809069	2.408931664	0.199679749	1	1.099250061
Com_103_neg	Ureidosuccinic acid	1.031	C5H8N2O5	176.13	Amino Acid And Its Derivatives	"923-37-5"	827700	817710	918300	87450	45280	1798000	1.327844908	0.40908665	0.319206679	0.666666667	0.905804857
Com_104_neg	L-Gulono-1,4-lactone	0.948	C6H10O6	178.14	Sugar Acids And Its Derivatives	"1128-23-0"	191200	191000	137400	46920	2752000	915800	0.139875953	-2.837780135	0.477994922	0.666666667	0.687629782
Com_105_neg	3-Methyladipic acid	5.747	C7H12O4	160.17	Fatty Acyls	"3058-01-3"	174300	142300	185100	14510000	24650	4614000	0.02620028	-5.254273936	0.42296707	0.666666667	0.716700338
Com_106_neg	Arachidonic acid	6.881	C20H32O2	304.47	Eicosanoid	"506-32-1"	99367	79252	92968	321400	27320	24970	0.726770853	-0.460427533	0.67891225	0.666666667	0.498626112
Com_107_neg	Erucic acid	2.37	C22H42O2	338.568	Fatty Acyls	"112-86-7"	18630000	11830000	14790000	31970	3643000	3346400	6.444611237	2.688093332	0.19345892	1	1.122578019
Com_108_neg	CTP	0.87	C9H16N3O14P3	483.156	Nucleotide And Its Derivates	"65-47-4"	60150	88750	127500	251947	33610	6353	0.946867185	-0.078766019	0.512029481	0.666666667	0.696523545
Com_109_neg	Raubasine	9.42	C21H24N2O3	352.427	Others	"483-04-5"	16214	12585	20155	10930	12546	29930	0.91663858	-0.125575087	0.99854315	0.666666667	0.354893793
Com_10_neg	13-HOTrE(r)	11.34	C18H30O3	294.429	Eicosanoid	"74784-20-6"	540600	518000	563100	2256000	571100	1023000	0.421209839	-1.247388959	0.217032094	1	1.068112722
Com_110_neg	Prostaglandin H2	9.33	C20H32O5	352.465	Hormones	"42935-17-1"	67320	32880	37910	6141	43094	92417	0.974995058	-0.036533188	0.666264368	0.555555556	0.50579797
Com_111_neg	Prostaglandin F2alpha	11.33	C20H34O5	354.481	Hormones	"551-11-1"	11178	1606	3093	8540	27647	91930	0.123925787	-3.012451679	0.091785136	0.888888889	1.228681432
Com_112_neg	Prostaglandin D2	9.34	C20H32O5	352.465	Hormones	"41598-07-6"	50912	26518	52127	6901	41555	394400	0.292548819	-1.773250698	0.905801862	0.555555556	0.407868793
Com_113_neg	Prostaglandin A1	11.38	C20H32O4	336.466	Hormones	"14152-28-4"	2535	10139	13666	3542	27647	83630	0.229404541	-2.124034145	0.392712725	0.777777778	0.77967415
Com_114_neg	Phosphocreatine	0.91	C4H10N3O5P	211.113	Organic Acid And Its Derivatives	"67-07-2"	42050	50770	30280	183136	10970	30060	0.549146615	-0.864736715	0.980702943	0.666666667	0.227241532
Com_115_neg	L-Histidine	0.76	C6H9N3O2	155.15	Amino Acid And Its Derivatives	"71-00-1"	66530000	56360000	69640000	101800	147500	3925000	46.12270321	5.527405165	0.047658778	1	1.461511576
Com_116_neg	D-threo-Isocitric acid	1.41	C6H8O7	192.124	Organic Acid And Its Derivatives	"6061-97-8"	29380000	19370000	32470000	2610000	3232000	51400000	1.418888229	0.504760947	0.321602531	0.666666667	0.903910782
Com_117_neg	Stearic acid	2.27	C18H36O2	284.477	Fatty Acyls	"57-11-4"	11200000	8579000	10730000	969919	3551000	5502000	3.043923631	1.605932164	0.121620481	1	1.267116636
Com_118_neg	3'-Dephospho-CoA	4.47	C21H35N7O13P2S	687.554	Co-Enzyme Factor	"3633-59-8"	11530	4632	7867	10426	4123	24694	0.612313024	-0.707658725	0.631737368	0.555555556	0.472229707
Com_119_neg	L-Homoserine	1.9	C4H9NO3	119.119	Amino Acid And Its Derivatives	"672-15-1"	169000	118400	183600	129800	72190	268100	1.0019358	0.002790069	0.777438621	0.555555556	0.335359397
Com_11_neg	Taurochenodeoxycholic acid sodium salt	10.09	C26H44NO6S.Na	521.68	Bile Acids	"6009-98-9"	92861	40942	103600	3797	58346	353100	0.571720655	-0.806617682	0.725252138	0.555555556	0.474367076
Com_120_neg	CMPF	9.29	C12H16O5	240.252	Fatty Acyls	"86879-39-2"	15595	13403	16302	33890	43632	48500	0.359461046	-1.476092655	0.003060891	1	1.569585341
Com_121_neg	D-Glyceraldehyde 3-phosphate	7.37	C3H7O6P	170.058	Organic Acid And Its Derivatives	"591-57-1"	5909	5642	6518	350100	4074	516800	0.02074574	-5.591041083	0.223159608	0.666666667	1.059443414
Com_122_neg	DL-o-Tyrosine	1.81	C9H11NO3	181.189	Organic Acid And Its Derivatives	"2370-61-8"	10790000	9974000	10820000	48850	6939000	26260000	0.949956163	-0.074067156	0.485163183	0.666666667	0.691125282
Com_123_neg	D-Lactic acid	1.44	C3H6O3	90.08	Organic Acid And Its Derivatives	"10326-41-7"	1110000	1542000	1719000	944300	31580	116200	4.002454033	2.000884834	0.148854313	1	1.217817819
Com_124_neg	Dihydroxyacetone phosphate	0.9	C3H7O6P	170.058	Carbohydrates And Its Derivatives	"57-04-5"	1174000	953000	1296000	12550	153300	347100	6.673165026	2.738371182	0.123177082	1	1.272204095
Com_125_neg	3,4-Dihydroxymandelic acid	8.68	C8H8O5	184.146	Organic Acid And Its Derivatives	"775-01-9"	9916	5359	12290	128800	48860	551800	0.037788227	-4.725919363	0.04329243	1	1.436080687
Com_126_neg	Sucrose	0.99	C12H22O11	342.297	Carbohydrates And Its Derivatives	"57-50-1"	8217000	912300	8346000	114600	54330	162800000	0.107230869	-3.221207813	0.649981432	0.666666667	0.501882664
Com_127_neg	D-Ribose 5-phophate	0.89	C5H11O8P	230.11	Organic Acid And Its Derivatives	"207671-46-3"	4232000	5489000	3120000	17410	240800	347600	21.19641472	4.405748355	0.058220211	1	1.41893728
Com_128_neg	D-Xylulose 5-phosphate	0.9	C5H11O8P	230.11	Carbohydrates And Its Derivatives	"4212-65-1"	11150000	15430000	7306000	91170	1339000	2052000	9.731288248	3.282630805	0.093953091	1	1.317189316
Com_129_neg	D-Xylonate	0.91	C5H10O6	166.129	Organic Acid And Its Derivatives	"526-91-0"	1998000	1977000	2221000	127400	2107000	18740000	0.295407735	-1.759220492	0.909634123	0.555555556	0.387385565
Com_12_neg	D-Glucose 6-phosphate	0.92	C6H13O9P	260.136	Carbohydrates And Its Derivatives	"56-73-5"	101000000	80930000	97990000	55120	2120000	1677000	72.66647976	6.183218113	0.049554065	1	1.455221251
Com_130_neg	dUMP	0.92	C9H13N2O8P	308.182	Nucleotide And Its Derivates	"964-26-1"	7557000	6004000	7629000	21740	403100	170500	35.59310646	5.153525947	0.040544381	1	1.477997313
Com_131_neg	Fosfomycin	11.02	C3H7O4P	138.059	Organic Acid And Its Derivatives	"23155-02-4"	20140	15840	22630	16260	15830	13320	1.290684871	0.368136801	0.127927609	0.888888889	1.154562355
Com_132_neg	Ethylmalonate	6.37	C5H8O4	132.115	Organic Acid And Its Derivatives	"601-75-2"	246100	237900	290900	84890	2331	322300	1.892210656	0.92007271	0.33316938	0.666666667	0.859322945
Com_133_neg	Thymidine 3,5-cyclic monophosphate	4.2	C10H13N2O7P	304.193	Nucleotide And Its Derivates	"6453-60-7"	29290	48140	24790	17405	31775	15100	1.590230243	0.669235662	0.19148955	0.777777778	1.003447717
Com_134_neg	2-Methylpentanedioic acid	5.012	C6H10O4	146.14	Organic Acid And Its Derivatives	"617-62-9"	119200	84580	141100	87990000	435500	1025000	0.00385554	-8.018851269	0.173104659	1	1.158698746
Com_135_neg	Phenylglyoxylic acid	4.881	C8H6O3	150.13	Benzoic Acid And Its Derivatives	"611-73-4"	5217	3903	6907	75680	4754	68860	0.107351936	-3.21957988	0.19456713	0.777777778	1.098713058
Com_136_neg	Methylmalonate	1.938	C4H6O4	118.09	Organic Acid And Its Derivatives	"516-05-2"	34040000	27460000	39760000	29710000	73110	61840000	1.105179687	0.144280951	0.472693244	0.555555556	0.644684977
Com_137_neg	Syringic acid	6.09	C9H10O5	198.17	Benzoic Acid And Its Derivatives	"530-57-4"	29032	19116	32965	25000	82760	45645	0.528750693	-0.919340447	0.252340172	0.777777778	0.953682876
Com_138_neg	Diacerein	9.512	C19H12O8	368.29	Others	"13739-02-1"	15741	13816	17478	10690	4253	52590	0.696474316	-0.521857943	0.853191661	0.666666667	0.304355773
Com_139_neg	Dulcitol	0.897	C6H14O6	182.17	Carbohydrates And Its Derivatives	"608-66-2"	9584000	11810000	9440000	63420	35660	4042000	7.445883683	2.896443079	0.120418502	1	1.278888192
Com_13_neg	VALSARTAN	6.98	C24H29N5O3	435.519	Amino Acid And Its Derivatives	"137862-53-4"	17136	9569	20309	56460	6863	88400	0.309867324	-1.690277466	0.431005175	0.666666667	0.699624346
Com_140_neg	Gluconolactone	1.02	C6H10O6	178.14	Amino Acid And Its Derivatives	"90-80-2"	107300	59780	89360	31360	1084000	398600	0.169383603	-2.56163387	0.423263699	0.666666667	0.75851697
Com_141_neg	DL-Panthenol	4.647	C9H19NO4	205.25	Fatty Acyls	"16485-10-2"	4963	4786	8532	6191	18460	26790	0.355378006	-1.492573698	0.16455496	0.888888889	1.146845958
Com_142_neg	Sebacic acid	8.111	C10H18O4	202.248	Organic Acid And Its Derivatives	"111-20-6"	220200	191800	243900	13690000	42820	8404000	0.029629369	-5.076828306	0.38125663	0.666666667	0.781567173
Com_143_neg	Tiglic acid	1.07	C5H8O2	100.116	Fatty Acyls	"80-59-1"	6648000	6385000	6786000	770900	2628000	1973000	3.689383645	1.883379817	0.061013958	1	1.423963227
Com_144_neg	4-Hydroxyphenylpyruvate	1.38	C9H8O4	180.16	Benzene and substituted derivatives	"156-39-8"	15710	6762	15310	41850	19556	91867	0.246501341	-2.020332601	0.084475157	1	1.256973659
Com_145_neg	Oxaloacetate	0.71	C4H4O5	132.072	Organic Acid And Its Derivatives	"328-42-7"	3414000	2757000	3682000	580900	787900	4472000	1.686926448	0.754397072	0.275102439	0.666666667	0.980893751
Com_146_neg	Tetrahydroaldosterone	0.97	C21H32O5	364.476	Hormones	"13489-75-3"	5161	9787	5784	8355	6854	11660	0.771595519	-0.37408333	0.33670324	0.777777778	0.785478938
Com_147_neg	dCDP	1.02	C9H15N3O10P2	387.177	Nucleotide And Its Derivates	"800-73-7"	55050	46290	79370	11947	54083	19040	2.124250617	1.086953984	0.161663952	0.888888889	1.125753416
Com_148_neg	Tolfenamic acid	2.15	C14H12ClNO2	261.7	Benzoic Acid And Its Derivatives	"13710-19-5"	593500	526200	544500	1244000	37580	323000	1.037156141	0.052633104	0.511421199	0.666666667	0.607692414
Com_149_neg	alpha-Benzylsuccinic acid	0.71	C11H12O4	208.211	Organic Acid And Its Derivatives	"884-33-3"	258300	230700	251300	98240	284500	337000	1.028565871	0.040634189	0.727891636	0.666666667	0.449249724
Com_14_neg	5'-Adenylic acid	1.036	C10H14N5O7P	347.221	Nucleotide And Its Derivates	"61-19-8"	5991000	5523000	7411000	5192	109800	1056000	16.16151092	4.014490175	0.107176376	1	1.312467461
Com_150_neg	5-Methoxytryptophol	3.77	C11H13NO2	191.23	Organoheterocyclic compounds	"712-09-4"	24050	21610	30600	2015	63600	96890	0.469277868	-1.091485672	0.952598424	0.666666667	0.340294465
Com_151_neg	Mevalonic acid	2.06	C6H12O4	148.157	Organic Acid And Its Derivatives	"150-97-0"	146800	130700	169100	247200	105200	304200	0.680170576	-0.556031499	0.459063175	0.666666667	0.666906117
Com_152_neg	6-Sialyllactose	0.73	C23H39NO19	633.551	Carbohydrates And Its Derivatives	"35890-39-2"	9854	5325	9529	13510	4453	14480	0.761581851	-0.392928996	0.696559085	0.666666667	0.348452663
Com_153_neg	2-Hydroxyisocaproic Acid	6.39	C6H12O3	132.158	Fatty Acyls	"498-36-2"	149800	129500	186300	40210	954	182800	2.078905538	1.055824206	0.313969289	0.777777778	0.890617153
Com_154_neg	Trehalose 6-phosphate	0.96	C12H23O14P	422.276	Carbohydrates And Its Derivatives	"4484-88-2"	4032000	2147000	4339000	7119	43860	8028000	1.301897183	0.380615516	0.266747923	0.666666667	0.999305806
Com_155_neg	Terephthalic Acid	5.7	C8H6O4	166.131	Benzoic Acid And Its Derivatives	"100-21-0"	2380000	2050000	2415000	145700000	15310000	18710000	0.038087024	-4.714556615	0.062550692	1	1.418783069
Com_156_neg	Citicoline	0.89	C14H26N4O11P2	488.324	Pyrimidines and pyrimidine derivatives	"987-78-0"	14030	14990	21370	16985	10390	40532	0.742044266	-0.430422842	0.741383236	0.555555556	0.396300498
Com_157_neg	Homotaurine	0.84	C3H9NO3S	139.17	Organic Acid And Its Derivatives	"3687-18-1"	241000	229500	236200	34350	287600	1251000	0.449283194	-1.154302998	0.987464178	0.666666667	0.377693345
Com_158_neg	Glycylglycine	0.8	C4H8N2O3	132.12	Amino Acid And Its Derivatives	"556-50-3"	92420	82170	84340	9538	25400	48970	3.085879773	1.625681855	0.106753222	1	1.312080481
Com_159_neg	Allitol	0.91	C6H14O6	182.172	Sugar Alcohols	"488-44-8"	11650000	12320000	10510000	83380	26410	4668000	7.216725725	2.851344425	0.127176756	1	1.263206764
Com_15_neg	UMP	1.037	C9H13N2O9P	324.181	Nucleotide And Its Derivates	"58-97-9"	22110000	22830000	25120000	12010	7678000	1973000	7.250328831	2.858046429	0.199244887	1	1.109775341
Com_160_neg	Undecylenic acid	6.665	C11H20O2	184.28	Fatty Acyls	"112-38-9"	1565000	1243000	1089000	761000	1047000	611100	1.610929685	0.687893523	0.068645082	1	1.280835236
Com_161_neg	scyllo-Inositol	0.853	C6H12O6	180.16	Carbohydrates And Its Derivatives	"488-59-5"	9971000	12040000	8994000	434100	3321000	3266000	4.415974705	2.142731908	0.113204568	1	1.287274334
Com_162_neg	Adrenosterone	9.479	C19H24O3	300.39	Hormones	"382-45-6"	38570	16290	47920	356400	4007	63110	0.242682112	-2.042860323	0.809109822	0.666666667	0.233003387
Com_163_neg	Succinic acid	1.936	C4H6O4	118.09	Tca Cycle	"110-15-6"	88880000	69810000	105700000	79970000	195700	140700000	1.197062287	0.259498223	0.462277731	0.555555556	0.659070315
Com_164_neg	Gentisic acid	5.399	C7H6O4	154.12	Benzoic Acid And Its Derivatives	"490-79-9"	29420	55450	38960	1784000	2661000	501100	0.025035887	-5.319858628	0.012088874	1	1.534559195
Com_165_neg	Thymidine	4.289	C10H14N2O5	242.23	Nucleotide And Its Derivates	"50-89-5"	16910	16290	12970	10030	4001	56790	0.651925276	-0.617221482	0.865387485	0.666666667	0.296815911
Com_166_neg	Cytosine	0.875	C4H5N3O	111.1	Nucleotide And Its Derivates	"71-30-7"	45950	28120	40160	211154	44254	1543	0.444559469	-1.169551674	0.79684014	0.555555556	0.446597091
Com_167_neg	Xanthurenic Acid	4.977	C10H7NO4	205.17	Organic Acid And Its Derivatives	"59-00-7"	1111000	725800	1091000	868500	410800	12720000	0.209139028	-2.25746578	0.653226718	0.555555556	0.516692776
Com_168_neg	cis-Aconitic acid	1.766	C6H6O6	174.11	Tca Cycle	"585-84-2"	83600000	75630000	87690000	2396000	1986892	111900000	2.1234422	1.086404839	0.219839705	0.666666667	1.078265422
Com_169_neg	2,3-Dihydroxybenzoic acid	5.963	C7H6O4	154.12	Benzoic Acid And Its Derivatives	"303-38-8"	15338531	10699660	12314107	5049000	485400	92880000	0.389702096	-1.359556402	0.67951433	0.666666667	0.42807477
Com_16_neg	L-Threonine	0.888	C4H9NO3	119.12	Amino Acid And Its Derivatives	"72-19-5"	2130000	2518000	1920000	75550	169000	1112000	4.841694003	2.275511903	0.108942352	1	1.30427192
Com_170_neg	Riboflavin-5-phosphate	5.52	C17H21N4O9P	456.344	Nucleotide And Its Derivates	"146-17-8"	2437000	2354000	2266000	2935	14980	33460	137.3625304	7.101844711	0.017488746	1	1.549520497
Com_171_neg	D-Glucopyranose	0.87	C6H12O6	180.156	Carbohydrates And Its Derivatives	"28905-12-6"	1820000	2274000	1670000	74040	451700	1075000	3.600834614	1.848331338	0.154410506	1	1.201971011
Com_172_neg	Prostaglandin I2	9.35	C20H32O5	352.465	Hormones	"35121-78-9"	33680	21730	26970	14270	13688	7670	2.312226339	1.209282627	0.029639855	1	1.420753272
Com_173_neg	Pyruvic Acid	1.78	C3H4O3	88.062	Tca Cycle	"127-17-3"	178200	123000	182000	69910	3724	211600	1.694047694	0.760474493	0.357776221	0.666666667	0.817130236
Com_174_neg	Pyrophosphate	0.97	H4O7P2	177.975	Others	"2466-09-3"	60870000	54790000	66600000	71150	38890000	285700	4.643939577	2.215349201	0.160148076	1	1.184215154
Com_175_neg	Prostaglandin G2	2.69	C20H32O6	368.465	Hormones	"51982-36-6"	14430	12290	14180	11912	5488	11650	1.407917384	0.49356268	0.256031198	1	0.976603041
Com_176_neg	Phosphopyruvic acid	1.03	C3H5O6P	168.042	Organic Acid And Its Derivatives		32490000	11940000	38160000	73310	69320	144200	287.940592	8.169627375	0.000496783	1	1.586623844
Com_177_neg	1-Dodecanol	6.18	C12H26O	186.33	Fatty Acyls	"112-53-8"	25310	25800	38780	40450	37390	25310	0.871449346	-0.198511287	0.530798473	0.611111111	0.559076181
Com_178_neg	Succinic anhydride	1.02	C4H4O3	100.07	Organic Acid And Its Derivatives	"108-30-5"	6248000	5812000	6773000	637700	2604000	1954000	3.624728141	1.857872795	0.07675156	1	1.37828472
Com_179_neg	Hydantoin-5-propionic acid	2.18	C6H8N2O4	172.14	Organoheterocyclic compounds	"5624-26-0"	168400	160700	185200	1024000	23070	249800	0.396570204	-1.33435181	0.965249139	0.666666667	0.117234318
Com_17_neg	Trehalose	0.962	C12H22O11	342.296	Carbohydrates And Its Derivatives	"99-20-7"	8785000	629800	11210000	184100	115800	227700000	0.090459689	-3.466581157	0.770680201	0.666666667	0.407913169
Com_180_neg	Indoleacetaldehyde	6.92	C10H9NO	159.18	Organoheterocyclic compounds	"2591-98-2"	102606	79813	96182	289000	5550	3579	0.934498153	-0.097736282	0.360963855	0.666666667	0.877271033
Com_181_neg	Dimethylmalonic acid	0.68	C5H8O4	132.11	Organic Acid And Its Derivatives	"595-46-0"	1058000	813300	1081000	221900	235800	1487000	1.518126189	0.602291715	0.315590784	0.666666667	0.913470199
Com_182_neg	Dipicolinic acid	5.74	C7H5NO4	167.12	Organoheterocyclic compounds	"499-83-2"	863153	629688	795492	3856000	1296000	1837000	0.32741923	-1.610789037	0.076669052	1	1.340816675
Com_183_neg	Glucotropaeolin	0.98	C14H19NO9S2	409.4	Carbohydrates And Its Derivatives	"499-26-3"	64340	92480	60120	160408	36230	23920	0.983596152	-0.023862005	0.64373395	0.666666667	0.55459649
Com_184_neg	Diflunisal	13.67	C13H8F2O3	250.2	Benzene and substituted derivatives	"22494-42-4"	155500	157100	162300	121900	126000	295900	0.873299007	-0.195452395	0.889861427	0.666666667	0.378435918
Com_185_neg	Hexadecanedioate	11.86	C16H30O4	286.41	Fatty Acyls	"505-54-4"	40030	45240	53940	108300	22390	3984000	0.033832439	-4.885448988	0.423229028	0.666666667	0.773000619
Com_186_neg	Hydroxyhydroquinone	0.92	C6H6O3	126.11	Phenols And Its Derivatives	"533-73-3"	2402000	2741000	2498000	33970	118500	7635000	0.981191581	-0.02739324	0.329140997	0.666666667	0.903714744
Com_187_neg	3-Phosphoglyceric acid	1.03	C3H8NaO6P	194.056	Carbohydrates And Its Derivatives	"17603-42-8"	110500000	44870000	109600000	385400	1220000	850500	107.8912008	6.753433398	0.000526916	1	1.576300433
Com_188_neg	4-Pyridoxic acid	2.94	C8H9NO4	183.161	Pyridine And Its Derivatives	"82-82-6"	40040	38320	53650	160700	176800	84480000	0.001556401	-9.327570929	0.239831542	1	1.07283133
Com_189_neg	ARCAR	1.06	C9H15N4O8P	338.211	Nucleotide And Its Derivates	"3031-94-5"	100770	95590	94480	382335	61540	67800	0.568407681	-0.815002046	0.782460502	0.666666667	0.380764301
Com_18_neg	L-Asparagine	0.843	C4H8N2O3	132.12	Amino Acid And Its Derivatives	"70-47-3"	10270000	11350000	9677000	146100	574800	45520000	0.676825062	-0.563145105	0.387795138	0.666666667	0.820508982
Com_190_neg	APS	1.05	C10H14N5O10PS	427.284	Nucleotide And Its Derivates	"485-84-7"	3889000	1539000	3893000	3172480	32360	18460	2.891756895	1.531946273	0.190452925	0.888888889	1.141492309
Com_191_neg	5-Phosphoribosyl 1-pyrophosphate	1.01	C5H13O14P3	196.25	Carbohydrates And Its Derivatives	"97-55-2"	67530	72320	74870	8733	60730	6152	2.839648218	1.505712216	0.157552233	1	1.195404778
Com_192_neg	2-Phenylbutyric acid	1.83	C10H12O2	164.2	Benzene and substituted derivatives	"90-27-7"	168000	129300	135500	157062	115100	379600	0.664046078	-0.590644741	0.515239875	0.555555556	0.653927472
Com_193_neg	p-cresol	6.59	C7H8O	108.14	Phenols And Its Derivatives	"106-44-5"	8409	7457	7498	8716	3314	8957	1.11326059	0.154791335	0.605375342	0.666666667	0.464466504
Com_194_neg	Galactaric acid	0.9	C6H10O8	210.14	Sugar Acids And Its Derivatives	"526-99-8"	66120	61690	89200	33060	20250	8647000	0.024942789	-5.325233377	0.681909069	0.666666667	0.506735763
Com_195_neg	6-keto PGE1	0.9	C20H32O6	368.5	Eicosanoid	"67786-53-2"	16800	23070	11240	60826	20190	51440	0.385863985	-1.3738357	0.104860421	0.888888889	1.192982855
Com_196_neg	Pimelic acid	5.77	C7H12O4	160.17	Fatty Acyls	"111-16-0"	175900	146300	179900	14420000	23200	4515000	0.026484582	-5.238703458	0.432494848	0.666666667	0.702699232
Com_197_neg	Mefenamic acid	11.14	C15H15NO2	241.28	Benzoic Acid And Its Derivatives	"61-68-7"	98040	90850	106200	113600	120700	87330	0.917482822	-0.124246948	0.526809609	0.666666667	0.584812901
Com_198_neg	Palmitaldehyde	10.19	C16H32O	240.42	Fatty Acyls	"629-80-1"	92440	93170	86050	119500	89560	72460	0.964975845	-0.051435265	0.927087473	0.555555556	0.382079744
Com_199_neg	Ribulose-5-phosphate	0.93	C5H11O8P	230.02	Carbohydrates And Its Derivatives		4696000	4475000	4036000	29720	785600	897800	7.709325675	2.946604675	0.13073056	1	1.256240092
Com_19_neg	Biopterin	2.097	C9H11N5O3	237.215	Organoheterocyclic compounds	"22150-76-1"	862285	596332	796913	4777000	85130	2464000	0.30787469	-1.699584827	0.83367317	0.666666667	0.190161041
Com_1_neg	Tauro-alpha-Muricholic acid sodium salt	9.01	C26H44NO7S.Na	537.69	Bile Acids	"25696-60-0"	2535	4207	412500	111799	357200	112591	0.720854898	-0.472219209	0.287863525	0.666666667	0.916764987
Com_200_neg	Glycoursodeoxycholic acid	10.47	C26H43NO5	449.631	Bile Acids	"64480-66-6"	116626	100368	109433	369000	47730	544300	0.339663694	-1.557821075	0.468020064	0.666666667	0.661236309
Com_201_neg	Glycochenodeoxycholic acid	10.48	C26H43NO5.Na	471.6	Bile Acids	"640-79-9"	156700	155300	153500	261800	175800	1778000	0.210101101	-2.250844371	0.286386183	1	0.987259563
Com_202_neg	Malonic acid	1.19	C3H4O4	104.011	Organic Acid And Its Derivatives	"141-82-2"	2537833	53390	103400	61890000	39980	6576000	0.039334128	-4.668074582	0.410484482	0.666666667	0.687900587
Com_203_neg	farensyl diphosphate	11.52	C15H37N3O7P2	433.418	Prenol lipids		4100	10572	5266	33855	43632	132800	0.094813279	-3.398767061	0.015095814	1	1.476256181
Com_204_neg	Glyceraldehyde 3-phosphate	1.26	C3H7O6P	170.058	Carbohydrates And Its Derivatives	"142-10-9"	5641	5259	4009	17560	7577	23850	0.304346051	-1.716215448	0.074943967	1	1.349806916
Com_205_neg	Asp-Phe	5.01	C13H16N2O5	280.276	Amino Acid And Its Derivatives	"13433-09-5"	639400	307600	525900	487600	518300	54330	1.389226866	0.474282216	0.464011082	0.777777778	0.716137202
Com_206_neg	Cytidine 5'-Monophosphate-N-Acetylneuraminic Acid	1.11	C20H30N4NaO16P	636.433	Pyrimidines and pyrimidine derivatives	"3063-71-6"	17850	10190	18740	13091	4253	36988	0.861002724	-0.215910293	0.817896024	0.555555556	0.288676838
Com_207_neg	Dl-Lanthionine	0.84	C6H12N2O4S	208.236	Amino Acid And Its Derivatives	"3183-08-2"	406000	467000	394300	308133	129442	233086	1.889628292	0.91810247	0.107422389	1	1.290221331
Com_208_neg	dTMP	2.14	C10H15N2O8P	322.208	Nucleotide And Its Derivates	"365-07-1"	385400	218800	325800	1444	48690	42350	10.05579343	3.329955014	0.115148119	1	1.280527754
Com_209_neg	5-Hydroxytryptophan	3.165	C11H12N2O3	220.22	Amino Acid And Its Derivatives	"56-69-9"	4244	5146	4553	9022	3314	16727	0.479750886	-1.059642624	0.37181697	0.666666667	0.812867226
Com_20_neg	Shikimic Acid	5.24	C7H10O5	174.15	Alcohols and polyols	"138-59-0"	4552	5623	104600	19920	2778	235100	0.445212919	-1.167432639	0.764131702	0.555555556	0.331655686
Com_210_neg	N-acetyl-L-ornithine	0.896	C7H14N2O3	174.198	Amino Acid And Its Derivatives	"6205-08-9"	645624	345891	493683	63100	192200	7087000	0.202279667	-2.305576785	0.959033131	0.666666667	0.378658367
Com_211_neg	Aminomalonic acid	0.88	C3H5NO4	119.08	Organic Acid And Its Derivatives	"1068-84-4"	2034000	1969000	1659000	121300	168300	953100	4.556208256	2.187833692	0.091896739	1	1.344070003
Com_212_neg	TPP	0.915	C12H19ClN4O7P2S	460.77	Co-Enzyme Factor	"154-87-0"	100500	71030	119500	243316	50957	10700	0.954281199	-0.067513646	0.564275068	0.666666667	0.638837237
Com_213_neg	Homoarginine	0.807	C7H16N4O2	188.23	Amino Acid And Its Derivatives	"156-86-5"	451900	404500	507700	4985	2997	486400	2.759202398	1.464251288	0.190659825	0.777777778	1.132086131
Com_214_neg	Creatine phosphate disodium salt	0.93	C4H8N3Na2O5P	255.08	Organic Acid And Its Derivatives	"922-32-7"	228800	204000	155700	256991	43460	41100	1.72302233	0.784941399	0.263701513	0.666666667	1.012529631
Com_215_neg	Tetradecanedioic acid	10.673	C14H26O4	258.35	Fatty Acyls	"821-38-5"	22000	25650	27950	61790	13240	377400	0.167097673	-2.581236456	0.41354574	0.666666667	0.769929545
Com_216_neg	Taurine	0.865	C2H7NO3S	125.15	Organic Acid And Its Derivatives	"107-35-7"	4860000	4059000	4037000	266000	87650	3629000	3.253110366	1.701819769	0.174178011	1	1.159909949
Com_217_neg	Estropipate	9.3	C22H32N2O5S	436.565	Hormones	"7280-37-7"	21702	12967	26501	42710	32865	99900	0.348596666	-1.520369323	0.081103614	1	1.270114565
Com_218_neg	Nicotinic acid N-oxide	1.56	C6H5NO3	139.11	Pyridine And Its Derivatives	"2398-81-4"	57910	52250	74990	107900	234800	441400	0.236130596	-2.08234311	0.07729846	1	1.375556732
Com_219_neg	N-Acetyl-DL-phenylalanine	6.85	C11H13NO3	207.226	Amino Acid And Its Derivatives	"2901-75-9"	1250000	921200	1445000	128900	12420	1110000	2.889908257	1.531023694	0.219853476	0.888888889	1.060820332
Com_21_neg	4-Hydroxyphenylacetate	0.7	C8H8O3	152.15	Phenols And Its Derivatives	"156-38-7"	782300	810700	575600	624300	876200	682800	0.993267073	-0.009746409	0.961559952	0.444444444	0.049209147
Com_220_neg	6-Methoxy-2-naphthoic acid	9.47	C12H10O3	202.21	Organic Acid And Its Derivatives	"2471-70-7"	19514	12720	21478	85900	1735	65840	0.349972308	-1.514687323	0.88699008	0.666666667	0.129816363
Com_221_neg	Sulfoacetic acid	0.95	C2H4O5S	140.115	Organic Acid And Its Derivatives	"123-43-3"	808600	842600	918900	413700	417500	23410000	0.106021979	-3.237564718	0.689070265	0.666666667	0.508604367
Com_222_neg	Thymidine 5'-diphosphate	0.69	C10H16N2O11P2	402.188	Nucleotide And Its Derivates		224100	199200	223800	17080	36790	283100	1.920348992	0.941368521	0.2500402	0.666666667	1.030645031
Com_223_neg	UDP-N-Acetyl-Alpha-D-Mannosamine	0.96	C17H27N3O17P2	607.354	Nucleotide And Its Derivates	"26575-17-7"	152300000	149800000	184700000	8002	27850	4765000	101.3986684	6.663894896	0.063613795	1	1.419998165
Com_224_neg	Uric Acid	1.14	C5H4N4O3	168.11	Organic Acid And Its Derivatives	"69-93-2"	65520	111700	280000	82060	101200	8853000	0.050598367	-4.304765365	0.520679506	0.444444444	0.665372538
Com_225_neg	Ribose 1-phosphate	0.9	C5H11O8P	230.11	Carbohydrates And Its Derivatives	"14075-00-4"	10670000	14410000	6553000	81190	655600	1937000	11.83077205	3.564472319	0.073671953	1	1.36407043
Com_226_neg	Sedoheptulose 7-phosphate	0.87	C7H13BaO10P	425.473	Carbohydrates And Its Derivatives	"2646-35-7"	4367000	3360000	4881000	5815	43730	49280	127.5790539	6.995247675	0.015529337	1	1.548693186
Com_227_neg	Sedoheptulose 1,7-bisphosphate	0.88	C7H16O13P2	370.142	Organic Acid And Its Derivatives	"815-91-8"	868000	656900	1024000	300600	130000	139000	4.474894663	2.161853722	0.01509813	1	1.508460048
Com_228_neg	S-Sulfo-L-cysteine	0.92	C3H7NO5S2	201.221	Amino Acid And Its Derivatives	"1637-71-4"	1153000	751500	630400	365981	607400	53720	2.468014343	1.303350779	0.222404077	1	1.068916963
Com_229_neg	dGDP	1.08	C10H15N5O10P2	427.201	Nucleotide And Its Derivates	"3493-09-2"	1593000	386600	1213000	2504	7394	11020	152.6245339	7.253843079	0.001248251	1	1.558083616
Com_22_neg	Beta-Alanine	4.54	C3H7NO2	89.09	Amino Acid And Its Derivatives	"107-95-9"	3288	1693	3944	9500	4199	14540	0.316052268	-1.661764927	0.07779601	1	1.2544996
Com_230_neg	D-Galactonic acid	0.92	C6H12O7	196.155	Organic Acid And Its Derivatives	"13382-27-9"	6020000	8023000	4900000	22020	722600	148800000	0.126671224	-2.980839276	0.610367436	0.666666667	0.569904254
Com_231_neg	D-Gluconic acid	0.91	C6H12O7	196.155	Sugar Acids And Its Derivatives	"526-95-4"	8106000	11140000	6453000	56990	1257000	194500000	0.1312419	-2.929699715	0.652298676	0.666666667	0.531585174
Com_232_neg	D-Glucarate	0.82	C6H10O8	210.139	Carbohydrates And Its Derivatives	"87-73-0"	527700	456100	384500	31170	32040	3294000	0.407570572	-1.294878207	0.547418104	0.666666667	0.616257256
Com_233_neg	UDP	0.7	C9H14N2O12P2	404.16	Nucleotide And Its Derivates	"58-98-0"	1287000	1119000	1978000	373400	710100	1760000	1.541761913	0.624579994	0.31218964	0.777777778	0.892474007
Com_234_neg	D-Erythrose 4-phosphate	0.95	C4H9O7P	200.084	Carbohydrates And Its Derivatives	"585-18-2"	1960000	1951000	1780000	46630	6845000	788100	0.741041677	-0.432373411	0.526131514	0.666666667	0.589105143
Com_235_neg	D-Fructose 1,6-bisphosphate	0.86	C6H14O12P2	340.116	Sugar Acids And Its Derivatives	"488-69-7"	674100	519800	545600	664639	259900	143300	1.628990887	0.703978533	0.264738815	0.777777778	1.023350038
Com_236_neg	AWD 131-138	8.03	C13H14ClN3O2	279.72	Others	"188116-07-6"	25975	18408	27769	9209	3429	84140	0.745541342	-0.423639739	0.629071693	0.666666667	0.500355014
Com_237_neg	dATP	0.73	C10H16N5O12P3	491.001	Nucleotide And Its Derivates	"1927-31-7"	24000	13000	35570	1975	2333	41060	1.599585611	0.677698209	0.300402396	0.666666667	0.917459455
Com_238_neg	Octanedioic acid	6.649	C8H14O4	174.19	Organic Acid And Its Derivatives	"505-48-6"	65190	53290	73840	4888000	10520	3061000	0.024162261	-5.371100725	0.391597423	0.666666667	0.765447103
Com_239_neg	N-Acetyl-D-glucosamine	0.984	C8H15NO6	221.208	Carbohydrates And Its Derivatives	"7512-17-6"	71220	50720	61830	12254	54083	4341	2.60010187	1.378568148	0.183997414	0.888888889	1.139842527
Com_23_neg	Erythronolactone	4.03	C4H6O4	118.09	Organoheterocyclic compounds	"15667-21-7"	81490	74350	109600	4079000	73710	1480000	0.047124741	-4.4073715	0.212704062	0.666666667	1.070719857
Com_240_neg	2-Hydroxybutyric acid	2.741	C4H8O3	104.1	Organic Acid And Its Derivatives	"600-15-7"	362100	351900	383500	2026000	5660	234700	0.484256694	-1.046156105	0.630352573	0.666666667	0.454161878
Com_241_neg	N-Acetyl-L-methionine	5.315	C7H13NO3S	191.25	Amino Acid And Its Derivatives	"65-82-7"	264100	174800	255100	191900	12970	240700	1.557555491	0.639283563	0.401042011	0.777777778	0.744758837
Com_242_neg	(R)-3-Hydroxyisobutyric acid	2.37	C4H8O3	104.104	Organic Acid And Its Derivatives	"1910-47-0"	11240000	8810000	12210000	407200	7727	816200	26.20363293	4.711694939	0.094802039	1	1.334375563
Com_243_neg	2-Hydroxybutanoic acid	2.64	C4H8O3	104.104	Organic Acid And Its Derivatives	"3347-90-8"	363700	352100	408500	2027000	81384	212600	0.484406614	-1.045709532	0.901636933	0.666666667	0.268798219
Com_244_neg	N-Acetyl-L-tyrosine	5.17	C11H13NO4	223.23	Amino Acid And Its Derivatives	"537-55-3"	286100	264400	348900	412700	283706	1581000	0.394922996	-1.340356719	0.338727321	0.777777778	0.895404565
Com_245_neg	Lactitol	0.9	C12H24O11	344.31	Carbohydrates And Its Derivatives	"585-86-4"	193900	104000	229100	7534	44690	4976000	0.104808378	-3.254174054	0.877997356	0.666666667	0.397378384
Com_246_neg	Itaconic acid	1.45	C5H6O4	130.1	Fatty Acyls	"97-65-4"	1667000	1712000	2119000	426600	301000	3923000	1.182213048	0.241490048	0.411233061	0.666666667	0.772030753
Com_247_neg	Pyridoxal 5-phosphate monohydrate	1.7	C8H12NO7P	265.16	Vitamins	"41468-25-1"	568100	639300	469400	314678	4430	11140	5.077396381	2.344088892	0.138276623	1	1.254044215
Com_248_neg	Dimetghyl 4-Hydroxyisophthalate	10.43	C10H10O5	210.18	Benzoic Acid And Its Derivatives	"5985-24-0"	9867	5106	5794	9500	4199	9796	0.883890189	-0.178060948	0.792191474	0.444444444	0.236236776
Com_249_neg	2-Acetylphloroglucinol	7.61	C8H8O4	168.15	Benzene and substituted derivatives	"480-66-0"	9322	7512	6630	160900	11770	17470	0.123403808	-3.018541184	0.221363306	1	1.061904756
Com_24_neg	Pyrroloquinoline Quinone	6.3	C14H6N2O8	330.21	Organoheterocyclic compounds	"72909-34-3"	77114	46529	61348	397400	22961	39460	0.402310899	-1.313617271	0.869437829	0.666666667	0.290819659
Com_250_neg	DL-Serine	0.83	C3H7NO3	105.09	Amino Acid And Its Derivatives	"302-84-1"	2645000	2810000	2718000	659400	283700	1913000	2.861594482	1.516819242	0.135140184	1	1.241983909
Com_251_neg	Deoxyadenosine	2.33	C10H13N5O3	251.242	Nucleotide And Its Derivates	"958-09-8"	3288000	2953000	3352000	5446	35960	2063000	4.558531006	2.188568988	0.164459194	1	1.190280567
Com_252_neg	2-Phenylpropionic acid	8.52	C9H10O2	150.17	Organic Acid And Its Derivatives	"492-37-5"	7724	7605	7670	16610	4123	10100	0.745921578	-0.422904134	0.759455671	0.666666667	0.291241113
Com_253_neg	Irbesartan	1.04	C25H28N6O	428.529	Benzene and substituted derivatives	"138402-11-6"	9156	13335	25940	11799	4621	18180	1.399739884	0.485158754	0.489891524	0.666666667	0.578499695
Com_254_neg	Hydroquinone	4.79	C6H6O2	110.111	Phenols And Its Derivatives	"123-31-9"	96410	24940	118500	725100	18810	31410	0.309356137	-1.692659441	0.920417826	0.555555556	0.249616015
Com_255_neg	Calcium D-Panthotenate	4.59	C18H32CaN2O10	476.53	Vitamins	"137-08-6"	35860000	31630000	37860000	1798000	46110	160500000	0.648930226	-0.623864729	0.371730772	0.666666667	0.811088369
Com_256_neg	2,6-Dihydroxybenzoic acid	6.13	C7H6O4	154.12	Benzoic Acid And Its Derivatives	"303-07-1"	4357972	6064	162500	4790000	398000	86720000	0.049250729	-4.343711111	0.22756561	0.888888889	0.957658217
Com_257_neg	L-Arabinose	0.9	C5H10O5	150.13	Carbohydrates And Its Derivatives	"5328-37-0"	33120	41420	237600	70810	121000	701100	0.349576105	-1.516321521	0.356484454	0.777777778	0.800680432
Com_258_neg	D-3-Phenyllactic acid	6.77	C9H10O3	166.17	Organic Acid And Its Derivatives	"7326-19-4"	11720000	9878000	13160000	480800	24360	1044000	22.43667536	4.48778701	0.075360365	1	1.383718638
Com_259_neg	Choline bitartrate	0.97	C9H19NO7	253.25	Cholines	"87-67-2"	115200	86530	201000	948800	730400	406300	0.193109566	-2.372508462	0.009455385	1	1.475376676
Com_25_neg	3-Hydroxypropanoic acid	1.15	C3H6O3	90.08	Organic Acid And Its Derivatives	"503-66-2"	154100	140700	165900	494400	3646	84170	0.791287082	-0.337726889	0.538847308	0.666666667	0.56902127
Com_260_neg	L-Glutamic acid monosodium salt	0.86	C5H8NNaO4	169.11	Amino Acid And Its Derivatives	"142-47-2"	31380000	45950000	31370000	279400	287800	34360000	3.112187636	1.637929044	0.179707929	0.777777778	1.152342273
Com_261_neg	L(+)-Asparagine monohydrate	0.83	C4H8N2O3.H2O	150.13	Amino Acid And Its Derivatives	"5794-13-8"	16090000	17600000	17400000	227000	1136000	58300000	0.856309606	-0.223795586	0.362044221	0.666666667	0.857617625
Com_262_neg	Cytidine-5'-monophosphate	0.97	C9H14N3O8P	323.197	Nucleotide And Its Derivates	"63-37-6"	869500	843000	801100	2091	139500	57090	12.65143622	3.661229267	0.111881742	1	1.2972317
Com_263_neg	p-Hydroxybenzaldehyde	6.214	C7H6O2	122.12	Benzene and substituted derivatives	"123-08-0"	23300	15220	8769	5366000	190600	96020	0.008365855	-6.90127127	0.102155886	1	1.297111617
Com_264_neg	L-Pyroglutamic acid	1.689	C5H7NO3	129.11	Organic Acid And Its Derivatives	"98-79-3"	3220000	2209000	3445000	1517000	809200	4778000	1.249120239	0.320912356	0.458977615	0.666666667	0.683459675
Com_265_neg	Citric acid	1.516	C6H8O7	192.12	Tca Cycle	"77-92-9"	176300000	168500000	190700000	48090000	67070000	269500000	1.392138512	0.47730276	0.358090066	0.666666667	0.860428288
Com_266_neg	Hippuric acid	5.87	C9H9NO3	179.17	Organic Acid And Its Derivatives	"495-69-2"	25690	22450	45230	622500	40970	70990	0.127127413	-2.975652933	0.226523591	0.888888889	1.029124728
Com_267_neg	Lactobionic acid	0.91	C12H22O12	358.3	Carbohydrates And Its Derivatives	"96-82-2"	502400	249400	545500	401825	29530	3828000	0.304576632	-1.715122837	0.932217343	0.555555556	0.219029509
Com_268_neg	Fumaric acid	1.82	C4H4O4	116.07	Tca Cycle	"110-17-8"	27630000	21320000	29950000	14300000	331200	32300000	1.681184372	0.749477951	0.378480429	0.666666667	0.784322623
Com_269_neg	L-Arabinitol	0.925	C5H12O5	152.15	Sugar Alcohols	"7643-75-6"	123200	134500	124000	13140	47140	2038000	0.181910898	-2.458696116	0.924386225	0.666666667	0.378810319
Com_26_neg	Rosmarinic Acid	0.89	C18H16O8	360.3	Cinnamic acids and derivatives	"20283-92-5"	3418	11430	2397	9500	2382	5708	0.980386583	-0.028577354	0.87169723	0.444444444	0.17669304
Com_270_neg	alpha-D-Glucose	0.912	C6H12O6	180.16	Carbohydrates And Its Derivatives	"492-62-6"	2656000	3383000	2510000	93380	669900	2472000	2.642429712	1.401865097	0.222384499	1	1.074202844
Com_271_neg	Taurohyocholic acid sodium salt	9.03	C26H44NNaO7S	537.69	Bile Acids		413442	264578	432900	276400	529700	551177	0.81849173	-0.288960255	0.554937269	0.777777778	0.588922785
Com_272_neg	L-(-)-Glyceric acid	1	C3H6O4	106.077	Sugar Acids And Its Derivatives	"28305-26-2"	767100	969200	770100	7157000	2230000	544300	0.252373808	-1.986365903	0.34749708	0.666666667	0.87802895
Com_273_neg	Lactic acid	1.44	C3H6O3	90.078	Organic Acid And Its Derivatives	"50-21-5"	33630000	46430000	51110000	29570000	1250000	4821000	3.680312	1.879828077	0.154207886	1	1.203858986
Com_274_neg	L-Cysteinesulfinic acid	0.88	C3H7NO4S	153.16	Organic Acid And Its Derivatives	"1115-65-7"	167700	159900	155000	3693	79590	655600	0.653148063	-0.61451802	0.566232654	0.666666667	0.612065075
Com_275_neg	L-Homocystine	0.83	C8H16N2O4S2	268.354	Amino Acid And Its Derivatives	"626-72-2"	58590	54026	60684	22530	37400	114522	0.993396464	-0.009558483	0.680264718	0.666666667	0.511496833
Com_276_neg	Linolelaidic Acid (C18:2N6T)	15.16	C18H32O2	280.445	Fatty Acyls	"506-21-8"	1202000	752700	1633000	501000	663800	27460000	0.125335374	-2.99613445	0.686201166	0.666666667	0.518584115
Com_277_neg	Lysopa 16:0	12.54	C19H39O7P	410.48	Phospholipid		11190	245542	27040	203935	399656	11300000	0.023839193	-5.390520807	0.117626678	0.888888889	1.170530594
Com_278_neg	Lysopa 18:0	13.78	C21H43O7P	438.53	Phospholipid		17410	13128	23940	33425	43632	195000	0.200244802	-2.320163304	0.12824262	1	1.246736149
Com_279_neg	Lysope 14:0	11.27	C19H40NO7P	425.5	Phospholipid		267200	78450	334000	947835	8568	67120000	0.009983636	-6.646219009	0.633417286	0.666666667	0.485511011
Com_27_neg	Tartaric Acid	0.96	C4H6O6	150.09	Sugar Acids And Its Derivatives	"87-69-4"	97960	87370	184300	734300	574300	309000	0.228505193	-2.129701143	0.01352411	1	1.451612121
Com_280_neg	Lysope 16:0	12.48	C21H44NO7P	453.55	Phospholipid		17350000	4025000	26220000	17040	32880	294200000	0.161750256	-2.628160096	0.428724495	0.666666667	0.755698009
Com_281_neg	LysoPE 18:0	13.73	C23H48NO7P	481.6	Phospholipid	"69747-55-3"	279300	76820	206900	2286	4042	1430000	0.391985675	-1.351127164	0.44661741	0.666666667	0.733983904
Com_282_neg	PE(18:1(9Z)/0:0)	12.85	C23H46NO7P	479.6	Glycerolipids	"89576-29-4"	24180000	7831000	41990000	46790	59500	526500000	0.140524337	-2.831108082	0.449841607	0.666666667	0.728624506
Com_283_neg	4-Hydroxyphenyllactate	5.02	C9H10O4	182.173	Organic Acid And Its Derivatives	"6482-98-0"	3177000	3435000	3478000	7474000	34920	629900	1.239737456	0.310034628	0.362611908	0.666666667	0.829159961
Com_284_neg	D-Glucosamine 6-phosphate	0.86	C6H14NO8P	259.151	Sugar Acids And Its Derivatives	"3616-42-0"	1793000	1796000	1861000	6295	36720	213200	21.27119802	4.410829385	0.061649178	1	1.426016024
Com_285_neg	2-Hydroxy-2-methylbutanedioic acid	1.5	C5H8O5	148.114	Fatty Acyls	"597-44-4"	1139000	821000	1251000	559500	85000	2760000	0.94316346	-0.084420268	0.54468897	0.666666667	0.566821813
Com_286_neg	2-Isopropylmalate	5.46	C7H12O5	176.167	Organic Acid And Its Derivatives		5355000	3776000	5844000	887500	93020	2764000	3.999177465	1.999703303	0.169664739	1	1.155153293
Com_287_neg	alpha-Ketocaproic acid	6.08	C6H10O3	130.142	Organic Acid And Its Derivatives	"2492-75-3"	1570000	810300	1271000	105000	335200	43920	7.542138313	2.914973608	0.047394034	1	1.423297088
Com_288_neg	3-(2-Naphthyl)-D-Alanine	6.22	C13H13NO2	215.248	Amino Acid And Its Derivatives	"76985-09-6"	33940	51540	44870	3650000	332300	1099000	0.025652884	-5.284735155	0.038933438	1	1.472528721
Com_289_neg	dADP	0.75	C10H15N5O9P2	411.202	Nucleotide And Its Derivates	"2793-06-8"	23730	21120	17310	4597	7432	40780	1.17707209	0.235202681	0.455027675	0.666666667	0.728873168
Com_28_neg	Hydroxyphenyllactic acid	5.07	C9H10O4	182.17	Organic Acid And Its Derivatives	"306-23-0"	2381000	2493000	2580000	5375000	24380	473500	1.269223958	0.343946659	0.360323661	0.666666667	0.83190671
Com_290_neg	2-deoxyglucose-6-phosphate	0.98	C6H13O8P	244.136	Nucleotide And Its Derivates	"3573-50-0"	3347000	2928000	4008000	2776600	31838	75930	3.565079075	1.833934076	0.168287296	1	1.191168533
Com_291_neg	dGTP	1.1	C10H16N5O13P3	507.181	Nucleotide And Its Derivates	"2564-35-4"	51880	12130	46250	37728	26671	49753	0.965905109	-0.05004663	0.745206834	0.555555556	0.319371315
Com_292_neg	3-Methylsalicylate	0.71	C8H8O3	152.147	Benzene and substituted derivatives	"83-40-9"	67920	133000	58670	291200	306600	279600	0.295862776	-1.756999898	0.035151417	1	1.493487576
Com_293_neg	S-(Methyl)Glutathione	2.13	C11H19N3O6S	321.35	Amino Acid And Its Derivatives	"2922-56-7"	60490	18130	61520	29158	45664	168200	0.576655611	-0.794218121	0.581018578	0.444444444	0.579602845
Com_294_neg	4-Methoxycinnamic Acid	8.54	C10H10O3	178.185	Cinnamic acids and derivatives	"830-09-1"	4233	1993	3109	2064000	33730000	73490	0.000260264	-11.90773915	0.067434517	1	1.399533245
Com_295_neg	trans-2-Butene-1,4-dicarboxylic Acid	4.651	C6H8O4	144.13	Fatty Acyls	"4436-74-2"	97275	14220	123413	547700	83079	288300	0.255590651	-1.968093028	0.17849319	0.777777778	1.020099072
Com_296_neg	Traumatic acid	9.19	C12H20O4	228.28	Fatty Acyls	"6402-36-4"	286200	253100	550700	10520000	159400	25280000	0.030311963	-5.043968909	0.274315237	0.666666667	0.958501111
Com_297_neg	2-Hydroxy-2-methylbutanoic acid	4.61	C5H10O3	118.13	Fatty Acyls	"3739-30-8"	125456	132993	123802	376600	10460	386400	0.494209138	-1.016806408	0.940085086	0.666666667	0.072692416
Com_298_neg	Pyridoxal 5'-phosphate hydrate	1.63	C8H10NO6P	247.14	Pyridine And Its Derivatives	"853645-22-4"	232100	209400	229300	110500	44290	412500	1.182463995	0.241796256	0.472068812	0.666666667	0.673058242
Com_299_neg	Quinic acid	0.998	C7H12O6	192.17	Organic Acid And Its Derivatives	"77-95-2"	977400	2067000	1198000	746600	295300	7068000	0.523113725	-0.934803472	0.89223229	0.666666667	0.281567747
Com_29_neg	4-Hydroxyphenylethanol	7.61	C8H10O2	138.16	Phenols And Its Derivatives	"501-94-0"	3908000	2993000	3234000	58860000	30510000	92470000	0.055735812	-4.165251595	0.009668789	1	1.566803415
Com_2_neg	2,3-Dinor-TXB2	0.97	C18H30O6	342.427	Eicosanoid	"63250-09-9"	3603000	152000	4011000	67540	56290	95450000	0.081256553	-3.621372022	0.838062016	0.666666667	0.371668413
Com_300_neg	Guanosine	2.772	C10H13N5O5	283.24	Nucleotide And Its Derivates	"118-00-3"	2221000	2355000	2114000	1193625	181589	356500	3.863224528	1.949805528	0.094789201	1	1.349817152
Com_301_neg	3,4-Dihydroxyphenylacetic acid	4.949	C8H8O4	168.15	Benzoic Acid And Its Derivatives	"102-32-9"	22260	10530	23570	1778000	126800	194600	0.026845765	-5.219161649	0.056165219	1	1.392462035
Com_302_neg	Lauric Acid	7.28	C12H24O2	200.32	Fatty Acyls	"143-07-7"	28720	27950	31510	29520	17120	19460	1.334039334	0.415801205	0.19111211	0.777777778	1.12224343
Com_303_neg	Inositol	0.85	C6H12O6	180.16	Phenols And Its Derivatives	"87-89-8"	296500	386800	301200	14110	96220	236100	2.841843951	1.506827337	0.20014612	1	1.113120125
Com_304_neg	Homovanillic acid	6.091	C9H10O4	182.17	Organic Acid And Its Derivatives	"306-08-1"	326312	290781	270067	1325000	70088	277800	0.530316435	-0.915074636	0.998134981	0.555555556	0.17783199
Com_305_neg	2,4-Dihydroxybenzoic Acid	1.7	C7H6O4	154.12	Benzoic Acid And Its Derivatives	"89-86-1"	6230	7413	4182	15963	18460	37470	0.247937908	-2.01194923	0.01769764	1	1.469331903
Com_306_neg	Hexadecanoic acid	15.7	C16H32O2	256.41	Fatty Acyls	"57-10-3"	841900	940000	891400	510000	739300	1603000	0.937243628	-0.093503983	0.892865177	0.666666667	0.385171133
Com_307_neg	Linoleic acid	15.19	C18H32O2	280.4	Fatty Acyls	"60-33-3"	1047000	976000	1602000	872500	611100	22690000	0.149956978	-2.737379439	0.621826247	0.666666667	0.560470921
Com_308_neg	gamma-Linolenic acid	12.03	C18H30O2	278.4	Fatty Acyls	"506-26-3"	52730	53250	57640	74260	61740	35920	0.951721731	-0.071388282	0.981271827	0.666666667	0.369357411
Com_309_neg	Palmitoleic acid	14.94	C16H30O2	254.41	Fatty Acyls	"373-49-9"	6338	5083	9511	33425	43632	134100	0.099130031	-3.334534005	0.023310796	1	1.490869188
Com_30_neg	Isocytosine	0.91	C4H5N3O	111.1	Nucleotide And Its Derivates	"108-53-2"	44720	29620	50380	155209	50071	53300	0.482326553	-1.05191786	0.234545768	0.888888889	0.981361079
Com_310_neg	Trans,Trans-Muconic Acid	0.96	C6H6O4	142.11	Fatty Acyls	"3588-17-8"	21040	14640	24980	168300	58060	56170	0.214702863	-2.219586663	0.04218213	1	1.404991317
Com_311_neg	5-Hydroxyhexanoic Acid	6.36	C6H12O3	132.16	Fatty Acyls	"185956-02-9"	1130000	1134000	1406000	308300	6241	1390000	2.153072293	1.106396761	0.310018972	0.777777778	0.897849888
Com_312_neg	trans-Elaidic acid	5.21	C18H34O2	282.5	Fatty Acyls	"112-79-8"	108700	71630	110000	47225	69268	11970	2.260028179	1.176340761	0.187348493	1	1.126155716
Com_313_neg	Cis-4,7,10,13,16,19-Docosahexaenoic Acid(C22:6N3)	14.89	C22H32O2	328.5	Fatty Acyls	"6217-54-5"	59260	62550	61560	71950	63360	201800	0.54394708	-0.878461796	0.332672808	1	0.917019272
Com_314_neg	Arachidic acid	12.43	C20H40O2	312.53	Fatty Acyls	"506-30-9"	3737	6871	11050	107500	348621	7565000	0.002700121	-8.532760042	0.060707023	1	1.419463136
Com_315_neg	alpha-Ketoglutaric acid	1.18	C5H6O5	146.098	Tca Cycle	"328-50-7"	477900	380000	326400	285000	184400	57010	2.249767292	1.169775782	0.168795768	1	1.184080648
Com_316_neg	Adenosine5-phosphosulfate	1.04	C10H13N5NaO10PS	449.266	Nucleotide And Its Derivates	"102029-95-8"	23540	10450	28260	11817	4505	46980	0.983381252	-0.024177245	0.681125216	0.555555556	0.421370777
Com_317_neg	Adenosine5'-diphosphoglucose	1.02	C16H23N5Na2O15P2	633.305	Nucleotide And Its Derivates	"102129-65-7"	23400	21550	32490	18299	27503	4607	1.536233609	0.619397618	0.351012604	0.777777778	0.863431539
Com_318_neg	Adenosine 5'-Diphosphate	1.04	C10H15N5O10P2	427.201	Nucleotide And Its Derivates	"58-64-0"	3992000	1194000	3955000	4611	26590	30490	148.1739638	7.211148158	0.00358483	1	1.543768799
Com_319_neg	5-Methyl-dl-tryptophan	4.26	C12H14N2O2	218.252	Amino Acid And Its Derivatives	"951-55-3"	288500	197700	241700	4055	420400	175700	1.212853346	0.278405116	0.464866421	0.666666667	0.689198124
Com_31_neg	5-Methoxysalicylic acid	7.72	C8H8O4	168.15	Organic Acid And Its Derivatives	"2612-02-4"	483155	392369	504548	1129000	108400	1187000	0.569242699	-0.812884212	0.876521453	0.666666667	0.148633506
Com_320_neg	5-Hydroxyindole-2-carboxylic acid	0.71	C9H7NO3	177.157	Indole And Its Derivatives	"21598-06-1"	386400	341400	362400	329600	731200	431700	0.730452261	-0.453138106	0.383369828	0.666666667	0.783035915
Com_321_neg	Dl-Glyceraldehyde3-phosphate	2.76	C3H7O6P	169.998	Tca Cycle	"591-59-3"	68293	54200	8358	258500	290600	302700	0.153617046	-2.70258978	0.079769389	1	1.374515346
Com_322_neg	D-Fructose 6-phosphate	0.87	C6H13O9P	260.03	Carbohydrates And Its Derivatives	"643-13-0"	26250000	18780000	22580000	2427648	2929000	1382000	10.03316986	3.326705575	0.003653366	1	1.57668652
Com_323_neg	5-oxoproline	1.63	C5H7NO3	129.043	Amino Acid And Its Derivatives	"149-87-1"	2148000	1474000	2211000	899900	478500	3372000	1.227896598	0.296189076	0.46022739	0.666666667	0.687749178
Com_324_neg	Deoxycytidine	1.81	C9H13N3O4	227.091	Nucleotide And Its Derivates	"951-77-9"	69230	56100	52570	81527	51680	148100	0.632405166	-0.661078942	0.346232982	0.666666667	0.852519029
Com_325_neg	9,10-EODE	1.69	C18H32O3	296	Fatty Acyls		10600	17040	11850	68960	29350	161200	0.1521714	-2.71623086	0.066436717	1	1.380352563
Com_326_neg	UDP-D-glucose	0.95	C15H24N2O17P2	566.1	Carbohydrates And Its Derivatives	"133-89-1"	140400000	130500000	136100000	2049	1417452	28640	281.0499806	8.134682905	0.051505964	1	1.45098589
Com_327_neg	13-HPODE	11.45	C18H32O4	312.1	Eicosanoid	"33964-75-9"	500673	23240	434018	12860	8127	7447000	0.128271648	-2.962725769	0.814356609	0.666666667	0.377007008
Com_328_neg	12,13-EODE	12.67	C18H32O3	296	Eicosanoid		146100	155000	189300	50650	42120	28770000	0.016990746	-5.879106975	0.719432289	0.666666667	0.479646521
Com_329_neg	Sodium cholate	10.34	C24H39NaO5	430.55	Bile Acids	"361-09-1"	329163	314161	308887	193000	168700	1465000	0.521273882	-0.939886519	0.86605973	0.666666667	0.37576396
Com_32_neg	13,14-dihydro-15-keto-PGD2	1.04	C20H32O5	352.465	Eicosanoid	"59894-07-4"	4357	9491	14282	24310	11330	84830	0.233502117	-2.098492467	0.163038593	0.888888889	1.094589131
Com_330_neg	Tropolone	7.39	C7H6O2	122.12	Ketones	"533-75-5"	150900	109900	162500	853200	208300	368300	0.296055392	-1.756060964	0.112104512	1	1.251897685
Com_331_neg	Bisphenol A	9.58	C15H16O2	228.29	Phenols And Its Derivatives	"80-05-7"	2652	4035	2340	2266	3438	4379	0.895269265	-0.159606436	0.705348063	0.555555556	0.411255417
Com_332_neg	Cyclohexaneacetic acid	1.03	C8H14O2	142.2	Fatty Acyls	"5292-21-7"	1974000	1424000	1993000	2963000	3343000	8257000	0.370184715	-1.433682769	0.097370768	1	1.307760471
Com_333_neg	3-(3-Methoxyphenyl)propionic acid	8.46	C10H12O3	180.2	Organic Acid And Its Derivatives	"10516-71-9"	90970	69791	87228	7774	182000	806	1.301233078	0.379879402	0.319776251	0.666666667	0.902204585
Com_334_neg	4-Nitrophenol	7.71	C6H5NO3	139.11	Phenols And Its Derivatives	"100-02-7"	887700	626100	903900	2994000	900500	2549000	0.375215333	-1.41420931	0.136543894	0.888888889	1.190966934
Com_335_neg	3,3-Dimethylglutaric acid	5.85	C7H12O4	160.17	Fatty Acyls	"4839-46-7"	1099704	892630	1001562	4270000	275461	1309000	0.511387129	-0.967512246	0.868162541	0.666666667	0.195193532
Com_336_neg	Tricarballylic acid	1.9	C6H8O6	176.12	Organic Acid And Its Derivatives	"99-14-9"	209800	134800	214300	6418000	119478	5957000	0.044731761	-4.482556644	0.23415076	0.666666667	1.030677284
Com_337_neg	GDP	1.07	C10H15N5O11P2	443.201	Nucleotide And Its Derivates	"146-91-8"	2628000	1240000	2308000	952417	21020	5154	6.311114654	2.657894833	0.136156418	1	1.260886194
Com_338_neg	CDP	0.99	C9H15N3O11P2	403.176	Nucleotide And Its Derivates	"63-38-7"	642100	813500	546200	541518	23160	623126	1.68529488	0.753001045	0.380586768	0.888888889	0.778325327
Com_339_neg	N-Methylhydantoin	1.39	C4H6N2O2	114.1	Organoheterocyclic compounds	"616-04-6"	101700000	74700000	88420000	510500000	79310000	812800000	0.188805156	-2.405029931	0.208087031	0.777777778	1.08589769
Com_33_neg	dCMP	1.04	C9H14N3O7P	307.197	Nucleotide And Its Derivates	"1032-65-1"	118400	68210	179100	12530	51140	405200	0.779981658	-0.358487897	0.633053238	0.666666667	0.546434306
Com_340_neg	Pentadecanoic acid	9.84	C15H30O2	242.4	Fatty Acyls	"1002-84-2"	384944	317127	355357	163800	346212	2912000	0.309007683	-1.694285385	0.656986835	0.555555556	0.559355943
Com_341_neg	O-Phospho-L-serine	0.83	C3H8NO6P	185.072	Amino Acid And Its Derivatives	"407-41-0"	376200	332200	456500	10560	161500	93340	4.389223813	2.133965837	0.141187304	1	1.224279614
Com_342_neg	hydroxyphenylpyruvate	4.43	C9H7O4-	179.149	Organic Acid And Its Derivatives	"622-54-8"	333600	167800	267700	131100	132708	28950	2.627084486	1.393462598	0.142239328	1	1.187311345
Com_343_neg	UDP-D-glucuronate	0.94	C15H22N2O18P2	580.285	Nucleotide And Its Derivates	"2616-64-0"	29430	20290	35370	11253	3967	35036	1.693131168	0.759693744	0.300022075	0.777777778	0.90182199
Com_344_neg	UDP-galactose	0.92	C15H22N2Na2O17P2	610.265	Nucleotide And Its Derivates	"2956-16-3"	253400000	225300000	251500000	21670	7743	93910	5921.036627	12.53163406	0.006054082	1	1.58565545
Com_345_neg	geranyl pp	0.83	C10H20O7P2	314.209	Prenol lipids		53260	14860	61920	9333	18760	8173	3.585727679	1.842265926	0.103976188	0.888888889	1.203346029
Com_346_neg	Glyceraldehyde 3-phosphate diethyl acetal	0.96	C7H15BaO7P	379.491	Organic Acid And Its Derivatives	"93965-35-6"	681000	624900	631500	2365655	5438000	289300	0.239393398	-2.062544727	0.421267777	0.666666667	0.75025566
Com_347_neg	1,2,3-Benzenetricarboxylic acid	6.42	C9H6O6	210.14	Benzoic Acid And Its Derivatives	"569-51-7"	244000	195400	304000	2311000	13240	81080	0.309064906	-1.694018247	0.735119989	0.666666667	0.383106799
Com_348_neg	2-Phosphoglyceric acid	0.92	C3H7O7P	186.057	Carbohydrates And Its Derivatives	"2553-59-5"	168800000	136500000	178800000	84060	5460000	538000	79.59474257	6.314601235	0.043729949	1	1.470638605
Com_349_neg	cis-7-Hexadecenoic Acid	11.65	C16H30O2	254.408	Fatty Acyls	"2416-19-5"	39010	41343	39240	3781	62146	1390000	0.082142168	-3.605733167	0.778880598	0.666666667	0.467353098
Com_34_neg	Xylitol	0.92	C5H12O5	152.146	Sugar Alcohols	"87-99-0"	15960	26880	21710	22484	5514	241700	0.239341782	-2.062855822	0.758812505	0.555555556	0.381079853
Com_350_neg	Citraconic acid	1.56	C5H6O4	130.099	Fatty Acyls	"498-23-7"	5256000	5421000	6999000	992000	783500	13650000	1.145894785	0.196474583	0.397458087	0.666666667	0.793334643
Com_351_neg	Citramalate	1.44	C5H8O5	148.114	Organic Acid And Its Derivatives	"2306-22-1"	63520	65230	76340	79965	27130	116800	0.916009737	-0.126565161	0.881860831	0.666666667	0.177418801
Com_352_neg	Cyclohexylsulfamate	1.2	C6H13NO3S	179.237	Organic Acid And Its Derivatives	"100-88-9"	103200	76720	95110	77954	41910	101000	1.245245943	0.316430711	0.406263183	0.666666667	0.722406128
Com_353_neg	Cytidine 3'-phosphate	1.22	C9H14N3O8P	323.197	Nucleotide And Its Derivates	"84-52-6"	6262000	5686000	6015000	12080	1333000	32330	13.04114243	3.704998353	0.094942142	1	1.336991828
Com_354_neg	D-2-Aminoadipic acid	18.5	C6H11NO4	161.156	Organic Acid And Its Derivatives	"7620-28-2"	3126000	3107000	3201000	3252000	3363000	8079992	0.64198742	-0.639383068	0.36295524	1	0.881744067
Com_355_neg	D-Arabinose 5-phosphate	0.9	C5H11O8P	230.11	Carbohydrates And Its Derivatives	"13137-52-5"	10890000	15330000	6665000	102000	1193000	1733000	10.86030383	3.44099256	0.075635877	1	1.351813862
Com_356_neg	Deoxyribose 5-Phosphate	0.82	C5H11O7P	214.11	Nucleotide And Its Derivates	"7685-50-9"	75010	67110	97020	56740	801700	1465360	0.102909028	-3.280558538	0.241517366	0.666666667	1.066915133
Com_357_neg	L-Adrenaline	1.034	C9H13NO3	183.204	Hormones	"51-43-4"	358900	457300	343300	282065	132615	119300	2.171429642	1.118645207	0.0771541	1	1.356603353
Com_358_neg	Ribitol	0.927	C5H12O5	152.15	Sugar Alcohols	"488-81-3"	71230	85680	80110	6726	37010	860100	0.26223784	-1.931052221	0.864337986	0.666666667	0.399976758
Com_359_neg	Prostaglandin E2	9.378	C20H32O5	352.465	Hormones	"363-24-6"	56810	39770	53420	10470	34983	76410	1.230890426	0.299702339	0.489706528	0.666666667	0.69066275
Com_35_neg	Pantetheine	5.84	C11H22N2O4S	278.13	Amino Acid And Its Derivatives	"496-65-1"	188400	273500	214500	81555	56127	8547	4.625621457	2.209647206	0.111160889	1	1.316866356
Com_360_neg	L-Ascorbate	1.03	C6H8O6	176.12	Vitamins	"50-81-7"	62390	43020	58120	21630	39150	422300	0.33851536	-1.562706799	0.790255262	0.666666667	0.453702308
Com_361_neg	Xanthine	1.714	C5H4N4O2	152.11	Nucleotide And Its Derivates	"69-89-6"	3925000	3349000	4796000	473300	612400	16880000	0.671835776	-0.573819472	0.536610415	0.666666667	0.633003714
Com_362_neg	4-Hydroxybenzoic acid	5.379	C7H6O3	138.12	Benzoic Acid And Its Derivatives	"99-96-7"	1603000	1581000	1654000	382700000	46030000	21970000	0.010734413	-6.541612871	0.046926814	1	1.464818245
Com_363_neg	Deoxyinosine	3.33	C10H12N4O4	252.23	Nucleotide And Its Derivates	"890-38-0"	119300	187000	124900	189087	145521	459500	0.542999189	-0.880978052	0.283253275	0.888888889	0.931114415
Com_364_neg	Indoxylsulfuric acid	5.62	C8H7NO4S	213.21	Organic Acid And Its Derivatives	"487-94-5"	10454	8589	12680	14022	18460	29260	0.513799359	-0.960723006	0.079292836	1	1.306568013
Com_365_neg	Glutaric Acid	0.7	C5H8O4	132.115	Organic Acid And Its Derivatives	"110-94-1"	2206000	1968000	2474000	388500	549700	3682000	1.438898749	0.524965077	0.338484824	0.666666667	0.886529088
Com_366_neg	N-Acetyl-Asp-Glu	2.02	C11H16N2O8	304.253	Amino Acid And Its Derivatives	"3106-85-2"	427000	304700	404700	207939	136500	71830	2.729965479	1.448882708	0.060186179	1	1.398111952
Com_367_neg	N-lactoyl-phenylalanine	6.97	C12H15NO4	237.25	Amino Acid And Its Derivatives		172500	149800	234000	18330	3345	126200	3.761961116	1.911484937	0.166547868	1	1.165717038
Com_368_neg	Orotidine	1	C10H12N2O8	288.211	Nucleotide And Its Derivates	"314-50-1"	676800	870700	755700	27590	51500	450700	4.347382925	2.120147176	0.122280044	1	1.274912942
Com_369_neg	NADH	2.79	C21H29N7O14P2	665.441	Co-Enzyme Factor	"58-68-4"	14620	5633	11530	24253	32506	102000	0.200196524	-2.320511168	0.056520159	1	1.338044241
Com_36_neg	Fmoc-L-Isoleucine	7.71	C21H23NO4	353.418	Amino Acid And Its Derivatives	"71989-23-6"	1274809	883285	1149980	5075000	41790	664500	0.572203436	-0.805399935	0.64854805	0.666666667	0.437373173
Com_370_neg	Glucarate O-Phosphoric Acid	8.7	C6H11O11P	290.12	Carbohydrates And Its Derivatives		15741	13816	17478	2600	4253	50370	0.821959702	-0.282860431	0.557651775	0.666666667	0.616469719
Com_371_neg	GTP	2.87	C10H16N5O14P3	523.18	Nucleotide And Its Derivates	"86-01-1"	17910	17090	23990	11817	3967	41932	1.022073602	0.031499092	0.586615175	0.666666667	0.523689827
Com_372_neg	Taurolithocholic acid sodium salt	12.297	C26H44NNaO5S	505.69	Bile Acids	"6042-32-6"	1142073	931093	23600	1175790	718475	14650000	0.126736727	-2.980093429	0.263528381	0.777777778	0.903318927
Com_373_neg	Glycolithocholic acid	12.023	C26H43NO4	433.629	Bile Acids	"474-74-8"	127100	68650	110900	89675	55425	115774	1.175471684	0.233239786	0.577377287	0.666666667	0.482609884
Com_374_neg	Chenodeoxycholic acid	11.768	C24H40O4	392.57	Bile Acids	"474-25-9"	98900	139690	70150	88860	57200	1570000	0.179912124	-2.474635682	0.570549975	0.555555556	0.59890606
Com_375_neg	23-Nordeoxycholic acid	11.215	C23H38O4	378.55	Bile Acids	"53608-86-9"	726100	803000	761300	663700	417900	14980000	0.142600986	-2.809944136	0.575407996	0.666666667	0.605533582
Com_376_neg	Deoxycholic acid	11.976	C24H40O4	392.57	Bile Acids	"83-44-3"	306851	331856	266311	68930	45710	1525000	0.551961406	-0.857360699	0.654473087	0.666666667	0.496528574
Com_377_neg	lithocholic acid	11.159	C24H40O3	376.57	Bile Acids	"434-13-9"	1950000	1327000	1472000	1104000	1333000	4441000	0.690462344	-0.53436536	0.724172169	0.555555556	0.489044418
Com_378_neg	Cholic acid	10.361	C24H40O5	408.57	Bile Acids	"81-25-4"	2307531	35310	2346106	3225000	3069000	21720000	0.167378704	-2.578812117	0.230905239	1	0.995592172
Com_379_neg	Myristic acid	1.03	C14H28O2	228.371	Fatty Acyls	"544-63-8"	6092000	3940000	5073000	132800	693200	20880000	0.695890537	-0.523067705	0.451248463	0.666666667	0.74167707
Com_37_neg	4-Hydroxy-2-oxoglutaric acid	0.74	C5H6O6	162.098	Organic Acid And Its Derivatives	"1187-99-1"	3291000	2757000	3476000	676400	773100	4525000	1.594108294	0.67274964	0.293428835	0.666666667	0.951510601
Com_380_neg	gamma-Glutamylcysteine	1.48	C8H14N2O5S	250.272	Amino Acid And Its Derivatives	"636-58-8"	52450	21530	45590	12590	50760	18670	1.457815167	0.543807815	0.39125052	0.777777778	0.706193126
Com_381_neg	Sorbitol	0.91	C6H14O6	182.172	Sugar Alcohols	"50-70-4"	16180000	16050000	13810000	89220	36800	6572000	6.873673115	2.781081244	0.129267746	1	1.259159739
Com_382_neg	3-Ureidoisobutyrate	1.71	C5H10N2O3	146.145	Organic Acid And Its Derivatives	"2905-86-4"	70840	67320	82830	9484	37158	75590	1.807955364	0.85435906	0.277379737	0.777777778	0.980842017
Com_383_neg	Hyodeoxycholate	10.533	C24H40O4	392.57	Bile Acids	"83-49-8"	47602	40807	23350	40970	35300	482400	0.200044749	-2.321605334	0.396236683	0.666666667	0.810521503
Com_384_neg	Taurodeoxycholic acid sodium salt	10.504	C26H44NNaO6S	521.69	Bile Acids	"1180-95-6"	20260	11330	12390	12610	13070	66250	0.478407484	-1.063688136	0.505017999	0.777777778	0.681363317
Com_385_neg	7-Ketolithocholic acid	11.061	C24H38O4	390.556	Bile Acids	"4651-67-6"	2626000	2016000	2439000	2073088	355821	2011896	1.594530721	0.673131894	0.340971424	0.888888889	0.839193288
Com_386_neg	L-Rhamnose monohydrate	0.98	C6H14O6	182.17	Carbohydrates And Its Derivatives	"6155-35-7"	180500	177000	151500	61520	121000	106000	1.764175794	0.818994327	0.091180034	1	1.311077356
Com_387_neg	4-Hydroxyisoleucine	1.038	C6H13NO3	147.172	Amino Acid And Its Derivatives	"781658-23-9"	31560000	45320000	32000000	271600	277800	34640000	3.094113568	1.629526151	0.180186019	0.777777778	1.151891104
Com_388_neg	Ala-Gln	0.85	C8H15N3O4	217.22	Amino Acid And Its Derivatives	"39537-23-0"	135400	149800	143000	16120	32810	849800	0.476450102	-1.069602965	0.661258871	0.666666667	0.517230023
Com_389_neg	O-Aceyl-L-Serine	1.056	C5H9NO4	147.129	Amino Acid And Its Derivatives	"5147-00-2"	258694	245684	230709	821000	20770	146600	0.743736657	-0.427136213	0.634630526	0.666666667	0.46254652
Com_38_neg	4-Methylpentanoate	0.89	C6H12O2	116.158	Organic Acid And Its Derivatives	"646-07-1"	783900	687600	743800	39770	674800	110000	2.686612416	1.425788206	0.186415311	1	1.12744808
Com_390_neg	3-Methyl-2-oxobutanoic acid	3.829	C5H8O3	116.12	Organic Acid And Its Derivatives	"759-05-7"	645900	459000	616800	49620	158797	64900	6.299278859	2.655186679	0.022939682	1	1.50347293
Com_391_neg	(S)-Leucic acid	6.404	C6H12O3	132.16	Organic Acid And Its Derivatives	"13748-90-8"	1178000	1203000	1455000	302700	6472	1270000	2.429121084	1.280434405	0.291049814	0.777777778	0.930242814
Com_392_neg	Lactose	0.911	C12H22O11	342.3	Carbohydrates And Its Derivatives	"63-42-3"	509500	53660	748000	8892	13000	21920000	0.059756014	-4.064772279	0.815054476	0.666666667	0.397537449
Com_393_neg	L-Dihydroorotic Acid	1.051	C5H6N2O4	158.11	Organic Acid And Its Derivatives	"5988-19-2"	31000	84810	45650	68480	71510	446700	0.275204963	-1.861421605	0.256394976	0.777777778	0.970688785
Com_394_neg	3-Hydroxyisovalerate	4.084	C5H10O3	118.13	Organic Acid And Its Derivatives	"625-08-1"	68300	70120	96170	3726000	52490	1340000	0.045831876	-4.447504844	0.240916415	0.666666667	1.017418827
Com_395_neg	5-Hydroxymethyluracil	1.041	C5H6N2O3	142.11	Nucleotide And Its Derivates	"4433-40-3"	121900	139600	150600	58170	78390	374800	0.805890175	-0.31134485	0.837394301	0.666666667	0.395642133
Com_396_neg	Phenylpyruvic acid	8.649	C9H8O3	164.16	Organic Acid And Its Derivatives	"156-06-9"	451400	110700	252000	80660	5257	16050	7.983955593	2.997103696	0.067390135	1	1.317879919
Com_397_neg	9-KODE	12.07	C18H30O3	294.2	Fatty Acyls	"54232-59-6"	92320	70640	82510	145294	681960	1070000	0.129381727	-2.950294214	0.098096714	1	1.348834827
Com_398_neg	N-Acetylalanine	2.15	C5H9NO3	131.13	Amino Acid And Its Derivatives	"97-69-8"	11800000	11460000	12180000	5032000	371000	8502000	2.548723481	1.349774859	0.251154539	1	1.001423733
Com_399_neg	Methyl beta-D-galactopyranoside	1.03	C7H14O6	194.182	Carbohydrates And Its Derivatives	"1824-94-8"	47290	46640	40320	7202	261600	432100	0.191538903	-2.384290653	0.6248749	0.666666667	0.56353289
Com_39_neg	beta-Hydroxyisobutyrate	2.4	C4H8O3	104.104	Organic Acid And Its Derivatives	"2068-83-9"	12850000	10270000	14220000	475200	9182	891300	27.14290076	4.762503004	0.092303919	1	1.340750233
Com_3_neg	Indolelactate	6.93	C11H11NO3	205.21	Indole And Its Derivatives	"1821-52-9"	6965	5599	8862	38470	27916	67420	0.160127349	-2.642708365	0.008742667	1	1.534866489
Com_400_neg	Methyl alpha-D-glucopyranoside	1.02	C7H14O6	194.182	Carbohydrates And Its Derivatives	"97-30-3"	40590	36210	42120	57685	86764	441600	0.202918186	-2.301029926	0.194709682	1	1.157934167
Com_401_neg	Lysops 22:6	13.14	C28H44NO9P	569.62	Phospholipid		8557	15270	11630	39585	49836	164900	0.139418294	-2.842508214	0.042424447	1	1.437351094
Com_402_neg	Lysope 18:1	12.81	C23H46NO7P	479.588	Phospholipid		21820000	6881000	37720000	46280	59040	463500000	0.143270573	-2.803185773	0.4536961	0.666666667	0.723671241
Com_403_neg	Hydroxyglutaric acid	1.45	C5H8O5	148.11	Organic Acid And Its Derivatives	"13095-47-1"	6984000	4669000	8830000	6519000	111800	20580000	0.752752584	-0.40975234	0.597924724	0.555555556	0.480827071
Com_404_neg	Hydroxypyruvic acid	2.17	C3H4O4	104.061	Organic Acid And Its Derivatives	"1113-60-6"	396200	402400	519300	4351000	46810	1590000	0.220097164	-2.183787539	0.772395921	0.666666667	0.263821172
Com_405_neg	IDP	1.02	C10H13N4O15P3	522.149	Nucleotide And Its Derivates	"86-04-4"	194600	42930	137400	185991	53417	188699	0.875785726	-0.191350158	0.804949741	0.555555556	0.224402442
Com_406_neg	alpha-D-Galactose 1-phosphate	0.87	C6H13O9P	260.136	Sugar Acids And Its Derivatives	"2255-14-3"	181500000	142900000	170200000	57130	623300	1367000	241.5711404	7.916304301	0.023056901	1	1.531107327
Com_407_neg	Gamma-Glu-Leu	5.09	C11H20N2O5	260.287	Organic Acid And Its Derivatives	"2566-39-4"	1245000	735900	1346000	771239	37410	1056000	1.784196382	0.835274418	0.366231674	0.777777778	0.794902321
Com_408_neg	N-Acetyl-D-glucosamine 6-phosphate	1.81	C8H16NO9P	301.188	Sugar Acids And Its Derivatives		26370	98010	24590	326222	24799	44590	0.376556769	-1.409060715	0.56339871	0.666666667	0.53729641
Com_409_neg	Glycerol-3-phosphate	0.9	C3H9O6P	172.074	Fatty Acyls	"57-03-4"	36250000	39560000	37590000	979500	12980000	10740000	4.591186056	2.198866898	0.138663407	1	1.237551984
Com_40_neg	Fructose	0.92	C6H12O6	180.063	Carbohydrates And Its Derivatives	"7660-25-5"	1967000	1861000	1401000	50850	314300	1897000	2.311517804	1.208840475	0.242467901	0.777777778	1.04015769
Com_410_neg	Mycophenolic acid	9.8	C17H20O6	320.34	Others	"24280-93-1"	12561	9149	11960	10410	4123	16820	1.073900424	0.102860228	0.658585891	0.555555556	0.416881109
Com_411_neg	9-HOTrE	12.07	C18H30O3	294.429	Fatty Acyls	"89886-42-0"	89480	78060	92630	114282	577801	994600	0.154249494	-2.696662334	0.140420688	1	1.261965615
Com_412_neg	L-Cycloserine	0.8	C3H6N2O2	102.09	Amino Acid And Its Derivatives	"339-72-0"	58250	79690	52430	33974	46765	34990	1.644963665	0.718055717	0.040538276	1	1.344262464
Com_413_neg	Valproic acid	10.55	C8H16O2	144.21	Organic Acid And Its Derivatives	"99-66-1"	2271000	1279000	1688000	1836799	449451	1670865	1.323691629	0.404567067	0.457225127	0.666666667	0.642738459
Com_414_neg	Royal jelly acid	8.16	C10H18O3	186.25	Fatty Acyls	"14113-05-4"	8279	3467	7022	13530	18460	29880	0.303345725	-1.720965115	0.027845697	1	1.403350723
Com_415_neg	D-Galactose	0.9	C6H12O6	180.16	Carbohydrates And Its Derivatives	"59-23-4"	3048000	3465000	2543000	109000	659600	2517000	2.756269783	1.462717106	0.207365426	1	1.101785053
Com_416_neg	DL-3,4-Dihydroxyphenyl glycol	7.37	C8H10O4	170.163	Benzene and substituted derivatives	"28822-73-3"	3818	5648	6482	322500	1691	506400	0.019200786	-5.702690824	0.300684023	0.666666667	0.915053795
Com_417_neg	Methyl 4-hydroxybenzoate	8.26	C8H8O3	152.15	Others	"99-76-3"	32760	1175	911	445700	11490	59100	0.067493076	-3.889116692	0.126404778	0.888888889	1.114008583
Com_418_neg	3-Indoleacrylate	5.36	C11H9NO2	187.195	Indole And Its Derivatives	"1204-06-4"	6194	21492	6149	209200	10881	18740	0.141675146	-2.819341408	0.284592387	0.777777778	0.901401753
Com_419_neg	L-Histidinol	0.95	C6H11N3O	141.171	Amino Acid And Its Derivatives	"4836-52-6"	6780	8113	6887	3073	2802	233900	0.090835158	-3.460605386	0.73961287	0.666666667	0.4619697
Com_41_neg	3-Hydroxyanthranilic acid	4.45	C7H7NO3	153.135	Benzoic Acid And Its Derivatives	"548-93-6"	106397	99350	102589	301800	52380	161000	0.598501495	-0.740573245	0.634659448	0.666666667	0.435934616
Com_420_pos	Lysopc 16:1	11.75	C24H48NO7P	493.61	Phospholipid		5372000	1929000	7645000	14290	14050	213500000	0.069995393	-3.836596228	0.516928424	0.666666667	0.649800943
Com_421_pos	Lysopc 16:2 (2N Isomer)	11.13	C24H46NO7P	491.308	Phospholipid		164700	85620	231600	15075	137085	16120000	0.029616228	-5.077468285	0.744123815	0.555555556	0.492037574
Com_422_pos	Lysopc 15:0	12.93	C23H48NO7P	481.317	Phospholipid		22702	20177	26840	15244	23532	14800	1.301310288	0.379965003	0.197253291	0.777777778	1.018074857
Com_423_pos	Lysopc 16:0	12.57	C24H50NO7P	495.63	Phospholipid		4124000	959700	7827000	142300	152800	513000000	0.025152588	-5.31314936	0.913030696	0.666666667	0.358281991
Com_424_pos	Lysopc 18:2	12.16	C26H50NO7P	519.65	Phospholipid		66950000	21470000	82090000	305200	372200	247400000	0.68732581	-0.540933959	0.332961856	0.666666667	0.8832817
Com_425_pos	Lysopc 18:3	12.57	C26H48NO7P	517.317	Phospholipid		2659000	462300	3825000	53620	42300	74610000	0.092981922	-3.426905948	0.700327922	0.666666667	0.466633518
Com_426_pos	Lysopc 17:0	13.17	C25H52NO7P	509.657	Phospholipid	"50930-23-9"	39270	6598	85500	23153	119666	9893000	0.013089913	-6.255400655	0.321965722	0.777777778	0.907144252
Com_427_pos	Lysopc 18:1	12.9	C26H52NO7P	521.667	Phospholipid	"3542-29-8"	126600000	38770000	160200000	381400	560700	367370000	0.88395141	-0.177961027	0.300841504	0.666666667	0.93132952
Com_428_pos	Lysine Butyrate	0.9	C10H22N2O4	234.293	Amino Acid And Its Derivatives	"80407-71-2"	243200000	221000000	233300000	611900	1503000	128900000	5.323821947	2.412462322	0.144967304	1	1.229461821
Com_429_pos	Lysopc 14:0	11.37	C22H46NO7P	467.577	Phospholipid	"20559-16-4"	329200	121100	500100	27880	95260	407900000	0.00232928	-8.745900422	0.702895448	0.666666667	0.51083553
Com_42_neg	3-Hydroxybutyrate	1.13	C4H8O3	104.104	Organic Acid And Its Derivatives	"300-85-6"	2537833	75440	127300	57380000	42620	6234000	0.043052443	-4.537761087	0.43653601	0.666666667	0.656137774
Com_430_pos	Isovalerylcarnitine	5.66	C12H23NO4	245.32	Carnitine	"31023-24-2"	17970000	9570000	17970000	80109	992706	2704000	12.04983564	3.590941563	0.087512993	1	1.339658243
Com_431_pos	3-Hydroxy-butyryl carnitine	1.91	C11H21NO5	247.291	Carnitine	"1469900-92-2"	3277000	2345000	3560000	2787741	262477	182400	2.840422221	1.506105398	0.171006201	0.888888889	1.186619786
Com_432_pos	Arachidonoylcarnitine	11.42	C27H46NO4	448.668	Carnitine	"36816-11-2"	291746	208809	57860	46693	583858	7003000	0.073152718	-3.77294473	0.46051678	0.666666667	0.736857069
Com_433_pos	Carnitine-C3	2.56	C10H17NO4	217.3	Carnitine		13870000	10640000	19600000	47670	47100	2846000	14.99947293	3.906839901	0.083920583	1	1.35928316
Com_434_pos	Carnitine-C4	4.63	C11H21NO4	231.3	Carnitine		31610000	18350000	33920000	6446	1594554	11150000	6.578307584	2.717716466	0.213018843	1	1.091356248
Com_435_pos	Cycloleucine	0.84	C6H11NO2	129.157	Amino Acid And Its Derivatives	"52-52-8"	273800000	238400000	284500000	379500	292400	14260000	53.35556761	5.737566918	0.049278232	1	1.457210895
Com_436_pos	cis-gondoic acid	16.03	C20H38O2	310.515	Fatty Acyls	"26764-41-0"	1011000	170200	990800	51910	50700	3854000	0.548954787	-0.865240764	0.59324962	0.666666667	0.553420066
Com_437_pos	cGMP	1.98	C10H12N5O7P	345.205	Nucleotide And Its Derivates	"7665-99-8"	130600000	106300000	113200000	1449	12520	1100000	314.2816362	8.295914166	0.05032358	1	1.455676306
Com_438_pos	D-Myo-inositol 4,5-bisphosohate	0.97	C6H14O12P2	340.116	Alcohols and polyols	"47055-78-7"	23200	46520	36960	36181	65390	138680	0.444035613	-1.171252706	0.207315197	0.777777778	1.046955427
Com_439_pos	Glu-Glu	1	C10H16N2O7	276.243	Amino Acid And Its Derivatives	"3929-61-1"	47860000	65820000	48030000	375966	420692	6396000	22.48264828	4.490740079	0.048685891	1	1.45362769
Com_43_neg	Undecanedioic acid	8.77	C11H20O4	216.27	Fatty Acyls	"1852-04-6"	248700	212200	333300	28660000	92980	19410000	0.016489843	-5.922278488	0.286259497	0.666666667	0.937839666
Com_440_pos	alpha-Farnesene	0.85	C15H24	204.351	Prenol lipids	"502-61-4"	35862	49964	54730	10530	59125	118400	0.747419638	-0.420009625	0.907681857	0.666666667	0.363165966
Com_442_pos	Ectoine	0.95	C6H10N2O2	142.156	Others	"96702-03-3"	391700	630600	590700	335100	76440	8094000	0.189641105	-2.398656394	0.940101656	0.666666667	0.282436182
Com_443_pos	Cadaverine	0.706	C5H14N2	102.18	Polyamine	"462-94-2"	114500	31700	50010	7476	241100	348300	0.328728245	-1.605032674	0.772916239	0.666666667	0.430035634
Com_444_pos	2-Furoic acid	4.832	C5H4O3	112.08	Organic Acid And Its Derivatives	"88-14-2"	58791	59684	57144	177800	48570	86873	0.560647804	-0.834833334	0.361884851	0.666666667	0.819112679
Com_445_pos	N-Acetylneuraminic acid	0.988	C11H19NO9	309.27	Amino Acid And Its Derivatives	"131-48-6"	60080	65150	32030	78012	6323	289100	0.421117464	-1.24770539	0.973243923	0.666666667	0.151021781
Com_446_pos	Kynurenic acid	5.296	C10H7NO3	189.17	Organic Acid And Its Derivatives	"492-27-3"	39510	27210	110300	5977000	784900	59730000	0.002662279	-8.553122425	0.047965502	1	1.424745823
Com_447_pos	Palmitoylethanolamide	14.399	C18H37NO2	299.49	Organic Acid And Its Derivatives	"544-31-0"	116100	106800	109100	151900	116200	11160000	0.029051198	-5.105258514	0.378261939	1	0.855325306
Com_448_pos	Dehydrocholic acid	12.273	C24H34O5	402.52	Bile Acids	"81-23-2"	12270	10410	16170	4683	10270	22830	1.028240214	0.040177341	0.695558073	0.666666667	0.494293957
Com_449_pos	17alpha-Hydroxyprogesterone	10.91	C21H30O3	330.46	Hormones	"68-96-2"	31370	22620	31620	4023	1983	13900	4.300713353	2.104575977	0.084656074	1	1.344040832
Com_44_neg	trans-2-Methyl-2-pentenoic Acid	18.5	C6H10O2	114.14	Fatty Acyls	"16957-70-3"	119500000	125700000	120800000	128300000	128300000	126400000	0.955613577	-0.065500744	0.085624388	1	1.309245624
Com_450_pos	Uracil	1.47	C4H4N2O2	112.09	Nucleotide And Its Derivates	"66-22-8"	6624000	5448000	6338000	104900	129100	8213000	2.179472002	1.123978671	0.215070749	0.666666667	1.088720566
Com_451_pos	L-Tryptophan	4.894	C11H12N2O2	204.23	Amino Acid And Its Derivatives	"73-22-3"	191800000	160500000	190500000	2767000	74890000	268200000	1.569434766	0.650245064	0.372532483	0.666666667	0.839209244
Com_453_pos	Hexadecanamide	14.82	C16H33NO	255.44	Fatty Acyls	"629-54-9"	36610000	7212000	33640000	3303000	4186000	58740000	1.16960848	0.226025676	0.504733821	0.666666667	0.632294581
Com_454_pos	N-Lauryldiethanolamine	9.45	C16H35NO2	273.45	Amines	"1541-67-9"	798300	786100	786300	865400	2002000	3956000	0.347436762	-1.525177683	0.184098306	1	1.181571893
Com_455_pos	2-Aminoethylphosphonate	0.98	C2H8NO3P	125.06	Organic Acid And Its Derivatives	"2041-14-7"	273700	218200	246800	9451	6791	361300	1.956603504	0.96835143	0.232881366	0.666666667	1.053141582
Com_456_pos	10-Formyl-Thf	4.85	C20H23N7O7	473.4	Organoheterocyclic compounds	"2800-34-2"	10160	10340	63190	12530	117966	206100000	0.000405808	-11.26691482	0.346606289	0.888888889	0.90024996
Com_457_pos	6-Methylmercaptopurine	4.04	C6H6N4S	166.21	Purines and purine derivatives	"50-66-8"	137700000	94210000	133000000	496500	30570000	81190000	3.250680361	1.700741703	0.261700559	1	1.004870157
Com_458_pos	2-Hydroxycinnamate	1.81	C9H8O3	164.16	Cinnamic acids and derivatives	"614-60-8"	29630000	21980000	28720000	146100	8862000	45160000	1.482976143	0.568495389	0.376726967	0.666666667	0.833399288
Com_459_pos	Piperidine	2.04	C5H11N	85.15	Organoheterocyclic compounds	"110-89-4"	10400000	7768000	10280000	40170	782300	10490000	2.514747	1.330413263	0.245617225	0.666666667	1.038439567
Com_45_neg	Nonadecanoic acid	18.28	C19H38O2	298.5	Fatty Acyls	"646-30-0"	189500	172500	219900	199800	179800	282155	0.879328452	-0.185525944	0.50914244	0.666666667	0.637129187
Com_460_pos	Isoquinoline	4.9	C9H7N	129.16	Organoheterocyclic compounds	"119-65-3"	33820	21420	34900	7473	14850	50605	1.236013602	0.30569462	0.468264374	0.666666667	0.710068755
Com_461_pos	Purine	4.1	C5H4N4	120.112	Nucleotide And Its Derivates	"120-73-0"	955500	679400	961800	4451	230300	593200	3.136296713	1.649062054	0.262436313	1	1.003732882
Com_462_pos	LysoPC 15:1	11.45	C23H46NO7P	479.1	Phospholipid		35968	68548	3174	162295	362462	1663000	0.049223931	-4.344496309	0.058609777	1	1.305803714
Com_463_pos	Valpromide	8.38	C8H17NO	143.23	Organic Acid And Its Derivatives	"2430-27-5"	78347	81680	84938	44060	217000	164700	0.575359357	-0.79746478	0.546058921	0.666666667	0.617000517
Com_464_pos	Solvent Red 23	11.04	C22H16N4O	352.39	Others	"85-86-9"	71990	80700	79810	119200	62730	52990	0.989698621	-0.014938827	0.852485676	0.666666667	0.400045591
Com_465_pos	S-Methyl-5'-thioadenosine	4.94	C11H15N5O3S	297.333	Nucleotide And Its Derivates		41740000	34110000	33000000	152000	2790254	37240000	2.70890727	1.437711009	0.23519834	0.777777778	1.056712616
Com_466_pos	Nonanoic acid	1.05	C9H18O2	158.24	Fatty Acyls	"112-05-0"	468200	273400	598500	128175	15870	29090	7.740202732	2.952371354	0.047647834	1	1.414875673
Com_467_pos	methyl oxo pentanoate	10.97	C6H10O3	130.142	Organic Acid And Its Derivatives	"816-66-0"	1430000	1493000	1500000	681100	667200	727500	2.130744773	1.091357793	8.44E-05	1	1.601019125
Com_468_pos	Isobutyrylglycine	0.63	C6H11NO3	145.156	Organic Acid And Its Derivatives	"15926-18-8"	91280000	57500000	78000000	4318000	9270000	4264000	12.70333856	3.667135796	0.002824621	1	1.568289593
Com_469_pos	6-Aminonicotinamide	1.95	C6H7N3O	137.139	Pyridine And Its Derivatives	"329-89-5"	2979000	1974000	3054000	21700	161400	760400	8.486486486	3.085167383	0.101290123	1	1.318135169
Com_46_neg	2,3,4-Trihydroxybenzoic acid	4.569	C7H6O5	170.12	Benzoic Acid And Its Derivatives	"610-02-6"	2244	52426	1814	533900	15710	54830	0.093448481	-3.419684973	0.163320021	0.888888889	1.045300703
Com_470_pos	(5-L-Glutamyl)-L-Amino Acid	1.18	C8H14N2O5	218.207	Amino Acid And Its Derivatives	"5875-41-2"	2015000	1286000	2074000	294827	122100	3627000	1.329153568	0.4105078	0.346497303	0.666666667	0.854195647
Com_471_pos	Fexofenadine	12.04	C32H39NO4	501.656	Others	"83799-24-0"	11950000	3844000	19750000	33777514	34899241	237700000	0.116014023	-3.107628892	0.081924532	1	1.25601411
Com_472_pos	Feruloylcholine	14.42	C15H22NO4	280.34	Cholines		1441000	426600	1793000	301064	470493	61240	4.395548975	2.13604336	0.108639719	0.888888889	1.185016127
Com_473_pos	Gly-Tyr	3.09	C11H14N2O4	238.24	Amino Acid And Its Derivatives	"658-79-7"	2770000	1743000	2277000	96160	4055000	1582000	1.184338131	0.244081032	0.483410062	0.666666667	0.658952027
Com_474_pos	Gly-Phe	4.88	C11H14N2O3	222.24	Amino Acid And Its Derivatives	"3321-03-7"	9926000	6091000	8980000	2328000	14340000	3569000	1.235212729	0.304759525	0.457306449	0.666666667	0.652318131
Com_475_pos	Glycerol 1-hexadecanoate	13.72	C19H38O4	330.503	Glycerolipids	"542-44-9"	24610	24540	24090	4536	316277	769700	0.067161052	-3.896231367	0.458437678	0.666666667	0.753837677
Com_476_pos	gamma-Muurolene	4.87	C15H24	204.351	Fatty Acyls	"24268-39-1"	1755000	1143000	1683000	19930	301800	8709000	0.507267962	-0.97918005	0.512719197	0.666666667	0.672352892
Com_477_pos	Galactinol	0.95	C12H22O11	342.297	Carbohydrates And Its Derivatives	"3687-64-7"	6946000	1925000	8220000	4635000	2666000	40580000	0.356947432	-1.486216471	0.62962917	0.444444444	0.518030977
Com_478_pos	Flavin Adenine Dinucleotide	5.14	C27H33N9O15P2	785.55	Nucleotide And Its Derivates	"146-14-5"	433400	4980	537200	176155	269017	37960	2.019282515	1.01384277	0.935208185	0.666666667	0.08621879
Com_479_pos	3-Hydroxy-3-Methylpentane-1,5-Dioic Acid	0.87	C6H10O5	162.14	Fatty Acyls	"503-49-1"	523600	359400	519200	511900	210596	571800	1.083368874	0.115524547	0.686177741	0.555555556	0.359282043
Com_47_neg	Monobutyl phthalate	9.719	C12H14O4	222.24	Organic Acid And Its Derivatives	"131-70-4"	63640	52810	63880	95520	194400	231200	0.346043138	-1.530976199	0.059485652	1	1.425050797
Com_480_pos	Oxidized glutathione	1.78	C20H32N6O12S2	612.6	Amino Acid And Its Derivatives	"121-24-4"	73590000	33940000	79710000	831181	1768822	1718000	43.36263777	5.438380614	0.000541092	1	1.575155436
Com_481_pos	gamma-Butyrolactone	2.16	C4H6O2	86.09	Organoheterocyclic compounds	"96-48-0"	492900	401000	556100	48980	87650	548600	2.116077813	1.08139268	0.218962431	0.777777778	1.078422879
Com_482_pos	Delta-Tridecalactone	9.17	C13H24O2	212.329	Fatty Acyls	"7370-92-5"	10070	1293749	1526800	3490000	1190305	10570000	0.185610648	-2.429648615	0.255708002	0.777777778	0.948460303
Com_483_pos	5-Hydroxytryptophol	1.03	C10H11NO2	177.2	Indole And Its Derivatives	"154-02-9"	7802000	6650000	8153000	98720	2330000	3547000	3.782807762	1.919457462	0.206282441	1	1.10274159
Com_484_pos	6-Deoxy-D-glucose	1.825	C6H12O5	164.156	Carbohydrates And Its Derivatives	"7658-08-4"	5248000	3792000	4921000	179386	1586000	7822000	1.456184199	0.542192859	0.36804796	0.666666667	0.848442856
Com_485_pos	5-Aminopentanoate	0.96	C5H11NO2	117.146	Organic Acid And Its Derivatives	"660-88-8"	1148000	1436000	1240000	118300	12600000	1769000	0.263955326	-1.921634316	0.955729668	0.666666667	0.203507422
Com_486_pos	5-Hydroxylysine	0.72	C6H15ClN2O3	198.65	Amino Acid And Its Derivatives	"13204-98-3"	191600	139900	197700	23866	7371	146400	2.979109082	1.57488095	0.175989165	0.888888889	1.147761391
Com_487_pos	5-Methoxyindole-3-acetic acid	4.87	C11H11NO3	205.21	Indole And Its Derivatives	"3471-31-6"	3707500	2560695	3818700	12620000	634225	1251000	0.695397348	-0.524090529	0.683566841	0.666666667	0.452722101
Com_488_pos	Pyridoxamine	1	C8H12N2O2	168.193	Pyridine And Its Derivatives	"85-87-0"	3202000	2577000	2992000	60447	3762466	1567000	1.627298994	0.70247935	0.377742988	0.666666667	0.808069489
Com_489_pos	5beta-Androstan-17beta-ol-3-one	0.84	C19H30O2	290.44	Hormones	"571-22-2"	24150000	49360000	24150000	75380	171300	1692000	50.37448161	5.654621182	0.030646422	1	1.485701504
Com_48_neg	D-Ribose	0.92	C5H10O5	150.13	Carbohydrates And Its Derivatives	"50-69-1"	1054000	975200	1186000	679600	2547000	903500	0.77847994	-0.361268231	0.856020372	0.666666667	0.176198725
Com_490_pos	Etiocholanolone	0.68	C19H30O2	290.44	Hormones	"53-42-9"	1286000	2478000	1391000	1082841	657560	322400	2.499029233	1.321367778	0.087941565	1	1.273012217
Com_491_pos	5beta-Androstan-3beta-ol-17-one	0.68	C19H30O2	290.44	Hormones	"571-31-3"	1139000	2239000	1220000	77800	269500	271600	7.429310066	2.893228239	0.020614189	1	1.465892343
Com_492_pos	Sarcosine	0.9	C3H7NO2	89.093	Amino Acid And Its Derivatives	"107-97-1"	74230000	85070000	73330000	1435000	1079000	19600000	10.51958036	3.395005249	0.073189315	1	1.393072241
Com_493_pos	S-Adenosyl-methionine	0.84	C22H30N6O8S2	570.639	Amino Acid And Its Derivatives	"17176-17-9"	9244000	6394000	7788000	2866615	1816216	5638511	2.269666096	1.18248007	0.09661106	1	1.283605877
Com_494_pos	Vitamin B2	5.94	C17H20N4O6	376.364	Vitamins	"83-88-5"	7090000	5694000	5940000	113700	100200	8038000	2.269053188	1.182090427	0.210042819	0.666666667	1.096283813
Com_495_pos	R-Aminobutyrate	0.91	C4H9NO2	103.12	Organic Acid And Its Derivatives	"3775-73-3"	39320000	39450000	38220000	75700	12280	9520000	12.17633675	3.606008259	0.118580289	1	1.282690608
Com_496_pos	S-ribosyl-L-homocysteine	3.14	C9H17NO6S	267.3	Amino Acid And Its Derivatives		305400	464600	279900	23220	39050	284100	3.031151659	1.599866037	0.153899816	0.888888889	1.188723249
Com_497_pos	Spermidine	0.68	C7H19N3	145.246	Polyamine	"124-20-9"	28320000	18010000	24470000	1240000	2815000	1242000	13.36605626	3.740501947	0.003579672	1	1.566563235
Com_498_pos	5-Aminolevulinate	2.07	C5H9NO3	131.13	Organic Acid And Its Derivatives	"106-60-5"	9658000	7185000	9582000	24690	634900	9495000	2.602271485	1.379771481	0.244758887	0.888888889	1.039909549
Com_499_pos	5-Aminosalicylate	1.68	C7H7NO3	153.135	Organic Acid And Its Derivatives	"89-57-6"	150000	113200	197700	106200	1700000	445400	0.204698881	-2.288424881	0.315969027	0.666666667	0.895634334
Com_49_neg	10-Hydroxydecanoic acid	8.36	C10H20O3	188.264	Fatty Acyls	"1679-53-4"	7948	8206	2387	29050	44807	28690	0.180804899	-2.467494324	0.034136544	1	1.451958271
Com_4_neg	Decanoic acid	2.16	C10H20O2	172.265	Fatty Acyls	"334-48-5"	180600	202472	209175	1259000	710047	762700	0.216801556	-2.205552984	0.010630662	1	1.557404216
Com_500_pos	N-(5-Aminopentyl)acetamide	1.01	C7H16N2O	144.21	Polyamine	"32343-73-0"	503800	402900	557400	147700	666300	1781000	0.564200385	-0.825720444	0.859569553	0.666666667	0.419490035
Com_501_pos	Scopolamine HBr trihydrate	5.42	C17H28BrNO7	438.31	Organic Acid And Its Derivatives	"6533-68-2"	12613	12743	8992	21320	20080	23640	0.528105781	-0.921101161	0.018050415	1	1.502822797
Com_502_pos	H-Trp-NH2.HCl	4.587	C11H14ClN3O	239.7	Amino Acid And Its Derivatives	"5022-65-1"	10380	11060	17750	27500	455800	435092	0.04267241	-4.550552597	0.100749369	1	1.328804568
Com_503_pos	Methylguanidine HCl	0.88	C2H8ClN3	109.56	Organic Acid And Its Derivatives	"21770-81-0"	614800	584300	561000	25090	44120	389100	3.840413694	1.941261728	0.133597177	1	1.253780192
Com_504_pos	beta-Alanine methyl ester	0.98	C4H9NO2	103.12	Amino Acid And Its Derivatives	"4138-35-6"	176100000	168300000	169800000	427200	83070	47410000	10.73032351	3.423621668	0.120557671	1	1.278345623
Com_505_pos	Imidazoleacetic acid	0.91	C5H6N2O2	126.113	Organic Acid And Its Derivatives	"645-65-8"	1954000	1315000	2438000	229600	2127000	39960000	0.134864332	-2.890419248	0.824191055	0.555555556	0.443881173
Com_506_pos	1D-chiro-Inositol	18.32	C6H12O6	180.156	Phenols And Its Derivatives	"643-12-9"	1041000	1083000	929100	1390000	1431000	927000	0.81459445	-0.295846109	0.309812414	0.666666667	0.893826994
Com_507_pos	Isoproterenol	8.36	C11H17NO3	211.258	Hormones	"7683-59-2"	1250000	416000	428000	2082000	180900	240800	0.836362184	-0.257800263	0.749822183	0.666666667	0.380834065
Com_508_pos	L-(-)-alpha-Amino-epsilon-Caprolactam	0.7	C6H12N2O	128.172	Amino Acid And Its Derivatives	"21568-87-6"	10340000	9106000	10750000	501715	3125227	506400	7.305468553	2.868976807	0.058451099	1	1.43106164
Com_509_pos	L-Alanyl-L-leucine	4.45	C9H18N2O3	202.251	Amino Acid And Its Derivatives	"3303-34-2"	1853000	1396000	1437000	42720	10880000	2254000	0.355627197	-1.491562435	0.82192196	0.666666667	0.309743178
Com_50_neg	5-Hydroxymethyl-2-furancarboxylic acid	4.209	C6H6O4	142.11	Indole And Its Derivatives	"6338-41-6"	324900	245000	364400	1222000	1216000	116900	0.365689459	-1.451309051	0.526104292	0.666666667	0.631578618
Com_510_pos	Ip7G	0.96	C16H23N5O5	365.384	Nucleotide And Its Derivates	"59384-58-6"	791600	398500	990500	478000	226700	18470000	0.11372277	-3.136406949	0.696097255	0.555555556	0.482500459
Com_511_pos	Isobutyryl carnitine	4.62	C11H21NO4	231.289	Carnitine	"25518-49-4"	27490000	15580000	28600000	7986	25910	9121000	7.828597944	2.968753952	0.137224274	1	1.242139475
Com_512_pos	Isomaltose	0.9	C12H22O11	342.297	Carbohydrates And Its Derivatives	"499-40-1"	209900	329600	285100	113300	48240	1406000	0.526047182	-0.926735891	0.786499005	0.666666667	0.362433237
Com_513_pos	beta amino butyric acid	0.98	C4H9NO2	103.12	Amino Acid And Its Derivatives	"541-48-0"	34560	74360	46920	67168	49530	52820	0.919312403	-0.121372889	0.642752689	0.666666667	0.424372731
Com_514_pos	Adenine	1.032	C5H5N5	135.127	Nucleotide And Its Derivates	"73-24-5"	4465000	6849000	4381000	215100	2028000	10620000	1.220156883	0.287066656	0.425829009	0.666666667	0.765197376
Com_515_pos	Flucytosine	1	C4H4FN3O	129.09	Others	"2022-85-7"	40270	30960	36990	5827	10280	3519	5.514113931	2.463129076	0.022994195	1	1.51908056
Com_516_pos	acadesine	6.86	C9H14N4O5	258.231	Carbohydrates And Its Derivatives	"2627-69-2"	8947	13131	6996	19103	55830	28256	0.281754838	-1.827487711	0.04090942	1	1.377738607
Com_517_pos	8-Hydroxyguanosine	3.09	C10H13N5O6	299.24	Nucleotide And Its Derivates	"3868-31-3"	498420	381270	336600	462721	578896	246300	0.944385391	-0.08255237	0.973164558	0.555555556	0.258400796
Com_518_pos	4-Pregnen-17alpha,20alpha-Diol-3-One	0.87	C21H32O3	332.477	Hormones	"652-69-7"	12180	11090	18310	94062	21940	1775000	0.021988343	-5.507117321	0.198858735	1	1.127151129
Com_519_pos	H-Gly-Pro-OH	1.035	C7H12N2O3	172.18	Amino Acid And Its Derivatives	"704-15-4"	13950000	10080000	13930000	31550	3046000	1449000	8.386077697	3.067996197	0.15272459	1	1.203406145
Com_51_neg	Quinoline-4-carboxylic acid	2.637	C10H7NO2	173.17	Organic Acid And Its Derivatives	"486-74-8"	9569	15620	14970	356500	161700	804200	0.03036827	-5.041291474	0.012084071	1	1.5454966
Com_520_pos	L-Homocitrulline	0.972	C7H15N3O3	189.21	Amino Acid And Its Derivatives	"1190-49-4"	1220000	821500	1298000	11240	108500	6991000	0.469641697	-1.090367592	0.467699136	0.666666667	0.722739897
Com_521_pos	Glycyl-L-leucine	4.466	C8H16N2O3	188.22	Amino Acid And Its Derivatives	"869-19-2"	5854000	3229000	4704000	81970	3791000	2433000	2.18634088	1.128518354	0.319132254	0.888888889	0.896507098
Com_522_pos	5-Methylcytosine	0.991	C5H7N3O	125.13	Nucleotide And Its Derivates	"554-01-8"	162700	145900	146100	4191	53460	1215000	0.357285697	-1.484849933	0.656453196	0.666666667	0.532101371
Com_523_pos	D-Proline	0.967	C5H9NO2	115.13	Amino Acid And Its Derivatives	"344-25-2"	331300000	330300000	328100000	5773000	20200000	273000000	3.310332371	1.726976077	0.175240106	1	1.168872443
Com_524_pos	L-Hydroxyproline	0.88	C5H9NO3	131.13	Amino Acid And Its Derivatives	"51-35-4"	1438000	1368000	1449000	728400	477100	3425000	0.918907245	-0.122008852	0.675119182	0.666666667	0.468240025
Com_525_pos	Glycyl-L-valine	2.077	C7H14N2O3	174.2	Amino Acid And Its Derivatives	"1963-21-9"	7542000	4267000	6359000	44080	4506000	4138000	2.091140966	1.064290318	0.35175749	0.888888889	0.853924882
Com_526_pos	3-Chloro-L-tyrosine	4.071	C9H10ClNO3	215.63	Amino Acid And Its Derivatives	"7423-93-0"	16240	162600	30630	73179	48956	185151	0.681677655	-0.552838401	0.437532437	0.777777778	0.659927117
Com_527_pos	N6-Acetyl-L-lysine	1.304	C8H16N2O3	188.22	Amino Acid And Its Derivatives	"692-04-6"	4393000	3174000	4237000	21580	157900	3044000	3.661880949	1.872584888	0.182253133	1	1.153393549
Com_528_pos	N,N-Dimethylglycine	0.9	C4H9NO2	103.12	Amino Acid And Its Derivatives	"1118-68-9"	20650000	21170000	21420000	485800	6081000	91630000	0.64401284	-0.634838644	0.516681454	0.666666667	0.666955725
Com_529_pos	Guanosine monophosphate	1.01	C10H14N5O8P	363.058	Nucleotide And Its Derivates		17470000	7287000	20060000	80109	1094000	609200	25.13137095	4.651417469	0.031720302	1	1.449574616
Com_52_neg	2-Hydroxyphenylacetic acid	6.399	C8H8O3	152.15	Organic Acid And Its Derivatives	"614-75-5"	316500	288900	335800	347200	273385	1525000	0.438668242	-1.188797831	0.437889683	0.666666667	0.768983746
Com_530_pos	Diethylglutarate	0.67	C9H16O4	188.105	Organic Acid And Its Derivatives	"818-38-2"	12840000	9042000	13210000	1546000	3666000	21520000	1.312733802	0.392574394	0.390077385	0.666666667	0.815575879
Com_531_pos	Aspartic acid di-O-glucoside	0.84	C16H27NO14	457.1	Amino Acid And Its Derivatives		1022000	43800	1096000	4194	6194	11440000	0.188797096	-2.405091523	0.589267963	0.666666667	0.560706499
Com_532_pos	MAG (18:4)	11.27	C21H34O4	350	Glycerolipids		40577	68980	36433	36515	3676	239300	0.522342401	-0.936932276	0.781417247	0.555555556	0.300828351
Com_533_pos	5-Hydroxyindoleacetate	5.58	C10H9NO3	191.058	Indole And Its Derivatives	"54-16-0"	94296	97296	14750	214600	255726	1755000	0.092724392	-3.430907289	0.075901762	1	1.250318198
Com_534_pos	D-Phenylalanine	4.106	C9H11NO2	165.19	Amino Acid And Its Derivatives	"673-06-3"	578700000	545400000	589000000	9582000	421200000	530600000	1.781913953	0.833427672	0.371265775	1	0.831518162
Com_535_pos	Folic acid	5.117	C19H19N7O6	441.4	Vitamins	"59-30-3"	15870	14356	5339	15369	48760	24610	0.400782069	-1.319110132	0.133882436	0.888888889	1.104128045
Com_536_pos	Uridine	1.86	C9H12N2O6	244.2	Nucleotide And Its Derivates	"58-96-8"	5222000	6273000	4198000	331900	1049000	14810000	0.969248158	-0.045062007	0.433251379	0.666666667	0.758717581
Com_537_pos	Adenosine	2.762	C10H13N5O4	267.24	Nucleotide And Its Derivates	"58-61-7"	414800000	388600000	383500000	2589788	73661500	376900000	2.619213564	1.389133698	0.264214441	1	1.005746794
Com_538_pos	Cytidine	1.029	C9H13N3O5	243.22	Nucleotide And Its Derivates	"65-46-3"	8885000	16500000	9746000	1439561	1343000	18820000	1.62624237	0.701542288	0.292567895	0.666666667	0.933184403
Com_539_pos	Gamma-Caprolactone	6.631	C6H10O2	114.14	Organoheterocyclic compounds	"695-06-7"	315087	190706	242110	561000	551400	645857	0.425366144	-1.233222885	0.017834446	1	1.520208386
Com_53_neg	2-Hydroxy-3-methylbutanoic acid	4.932	C5H10O3	118.13	Fatty Acyls	"4026-18-0"	892900	900700	1013000	513300	6280	1182000	1.649408197	0.721948482	0.385800291	0.666666667	0.773985997
Com_540_pos	SDMA	0.913	C8H18N4O2	202.25	Amino Acid And Its Derivatives	"30344-00-4"	42180000	21330000	43100000	202900	7858000	61330000	1.536368602	0.619524385	0.35462322	0.666666667	0.862909282
Com_541_pos	Glutathione	1.51	C10H17N3O6S	307.32	Amino Acid And Its Derivatives	"70-18-8"	4959000	2824000	4653000	3181863	246533	250800	3.380086301	1.757060082	0.145430634	0.888888889	1.223345729
Com_542_pos	Xanthosine	3.928	C10H12N4O6	284.225	Nucleotide And Its Derivates	"146-80-5"	862100	712700	812800	180500	12410	4540000	0.504467653	-0.987166329	0.526321853	0.666666667	0.599791405
Com_543_pos	11beta-Hydroxytestosterone	0.68	C19H28O3	304.424	Hormones	"1816-85-9"	534200	367500	663000	49100	158500	1058000	1.236330594	0.306064571	0.412453198	0.666666667	0.784391177
Com_544_pos	10E,12Z-Octadecadienoic acid	14.42	C18H32O2	280.445	Fatty Acyls	"2420-56-6"	4564000	1314000	5539000	15380	28900	1555000	7.138837477	2.835689158	0.120380308	0.888888889	1.23803887
Com_545_pos	1,4-Dihydro-1-Methyl-4-Oxo-3-Pyridinecarboxamide	1.69	C7H8N2O2	152.151	Pyridine And Its Derivatives	"769-49-3"	6612000	5779000	7105000	888600	913100	22990000	0.78639222	-0.346679046	0.495506058	0.666666667	0.676258105
Com_546_pos	1-Methyladenosine	13.5	C11H15N5O4	281.268	Nucleotide And Its Derivates	"15763-06-1"	4602	4870	3356	3615	20732	29790	0.236954393	-2.077318684	0.222092124	0.777777778	1.089077682
Com_547_pos	Nandrolone	9.45	C18H26O2	274.398	Hormones	"434-22-0"	1475000	1059000	1571000	813800	5309000	8608000	0.278667825	-1.843381655	0.334292052	0.666666667	0.917010693
Com_548_pos	Methyltestosterone	14.44	C20H30O2	302.451	Hormones	"58-18-4"	9933	9716	9744	9698	9595	71580	0.32345141	-1.628379092	0.431698656	0.666666667	0.786531368
Com_549_pos	1-(4-Methoxyphenyl)-2-propanone	1.81	C10H12O2	164.201	Benzene and substituted derivatives	"122-84-9"	9264000	6728000	8572000	1074761	2740000	14510000	1.34048133	0.422751126	0.3838849	0.666666667	0.826238823
Com_54_neg	orotidine-5-phosphate	2.75	C10H13N2O11P	368.19	Nucleotide And Its Derivates		81630	71450	79110	1874	37158	82440	1.91146931	0.934682037	0.331923611	0.666666667	0.895427904
Com_550_pos	Lysopc 20:4	12.9	C28H50NO7P	543.681	Phospholipid		40900000	9376000	47630000	139000	111400	296100000	0.330372424	-1.597834824	0.398615962	0.666666667	0.788862179
Com_551_pos	Lysopc 20:0	15.1	C28H58NO7P	551.73	Phospholipid		46810	6047	25000	43575	288075	11150000	0.006780994	-7.204287512	0.170087936	0.888888889	1.155394121
Com_552_pos	cAMP	1.74	C10H12N5O6P	329.206	Nucleotide And Its Derivates	"60-92-4"	62630000	33460000	51580000	416624	425560	647800	99.1084468	6.630936115	6.31E-05	1	1.59743957
Com_553_pos	N-Acetyl-aspartic acid	1.37	C6H9NO5	175.139	Amino Acid And Its Derivatives		1650000	1579000	1947000	88210	12760	330700	11.990641	3.58383688	0.077758464	1	1.377680506
Com_554_pos	N',N",N"'-P-Coumaroyl-Cinnamoyl-Caffeoyl Spermidine	14.89	C34H37N3O6	583.67	Phenolamides		3685000	2232000	2861000	319927	836071	6840000	1.097799174	0.134614159	0.446537674	0.666666667	0.743775449
Com_555_pos	Benzamidine Hydrochloride Hydrate	4.09	C7H11ClN2O	174.628	Benzene and substituted derivatives	"206752-36-5"	12460000	8540000	12290000	37770	2817000	7493000	3.217118278	1.685768978	0.267841499	1	0.994476056
Com_556_pos	beta-Cubebene	13.54	C15H24	204.351	Fatty Acyls	"13744-15-5"	11750	9884	10918	10121	19493	81090	0.294045382	-1.76588926	0.302432408	0.777777778	0.979207739
Com_557_pos	Mag (18:1)	15.23	C21H40O4	356.2	Glycerolipids		49970	14100	112400	3827	1473	16370000	0.010776596	-6.535954582	0.987960295	0.666666667	0.333970725
Com_558_pos	L-beta-Imidazolelactic acid	0.83	C6H8N2O3	156.139	Carbohydrates And Its Derivatives	"14403-45-3"	7141000	5877000	7105000	72520	2203533	665000	6.842107232	2.774440715	0.117441198	1	1.280634508
Com_559_pos	Dodecanoylcarnitine	10	C19H37NO4	343.501	Carnitine	"25518-54-1"	4304	8314	5171	16500	4007	13220	0.527440923	-0.922918585	0.36698844	0.666666667	0.759778931
Com_55_neg	2-Oxoadipic acid	8.05	C6H8O5	160.125	Organic Acid And Its Derivatives	"3184-35-8"	28160	31980	38450	2012000	19560	3703000	0.017192252	-5.862097664	0.234669196	0.666666667	1.037210825
Com_560_pos	Decanoylcarnitine	9.04	C17H33NO4	315.4	Carnitine	"3992-45-8"	5279	10300	4988	27380	21828	15070	0.319969507	-1.64399367	0.018514145	1	1.436869973
Com_561_pos	L-Octanoylcarnitine	7.95	C15H29NO4	287.395	Carnitine	"25243-95-2"	4607	8989	2117	20692	11590	14430	0.336380373	-1.571834563	0.083665904	1	1.292416771
Com_562_pos	Hexanoylcarnitine	6.6	C13H25NO4	259.34	Carnitine	"22671-29-0"	9843	2162	6035	3799	20840	53360	0.231285016	-2.112256289	0.278095742	0.777777778	0.942295578
Com_563_pos	Voriconazole	9.598	C16H14F3N5O	349.31	Others	"137234-62-9"	2308	7616	2371	18479	1562	6260	0.46747272	-1.097045919	0.589972029	0.555555556	0.476271067
Com_564_pos	Cyclocytidine	0.922	C9H12ClN3O4	261.66	Ethers	"10212-25-6"	559900	306000	475100	73882	30180	40500	9.276296675	3.213548961	0.003260275	1	1.549938701
Com_565_pos	L-Tyrosinemethylester	4.5	C10H13NO3	195.215	Amino Acid And Its Derivatives	"1080-06-4"	242200	178600	203100	71140	17770000	656300	0.033728992	-4.889866999	0.444361865	0.666666667	0.702484779
Com_566_pos	D-Ala-D-Ala	0.95	C6H12N2O3	160.171	Amino Acid And Its Derivatives	"923-16-0"	492600	336800	387900	526613	1092000	748600	0.514233404	-0.959504765	0.075407259	1	1.294337363
Com_567_pos	D-Galactosamine	0.71	C6H14ClNO5	215.632	Carbohydrates And Its Derivatives	"1772-03-8"	278900	206000	265600	62950	146000	382600	1.268700871	0.343351956	0.448064008	0.666666667	0.742320268
Com_568_pos	8-Bromoguanosine	0.98	C10H12BrN5O5	362.137	Nucleotide And Its Derivates	"4016-63-1"	85050	72580	48930	62988	8806	185600	0.802505109	-0.317417518	0.728542719	0.555555556	0.339252057
Com_569_pos	Carnosine	0.76	C9H14N4O3	226.232	Organic Acid And Its Derivatives	"305-84-0"	225700	206300	243400	22680	76880	79300	3.776137761	1.916911398	0.068660531	1	1.399170304
Com_56_neg	Phosphonotyrosine	0.94	C9H12NO6P	261.168	Amino Acid And Its Derivatives	"21820-51-9"	876100	811700	985200	17500	34970	98090	17.75371945	4.150049399	0.023602571	1	1.527149619
Com_570_pos	N-METHYL (-)EPHEDRINE	8.01	C11H17NO	179.259	Benzene and substituted derivatives	"552-79-4"	135400	66880	106800	465400	113270	240700	0.377216642	-1.406534769	0.158635516	0.888888889	1.097227815
Com_571_pos	Nicotinuric Acid	1.43	C8H8N2O3	180.161	Amino Acid And Its Derivatives	"583-08-4"	101544	74856	93457	524200	24160	354100	0.299023779	-1.741667878	0.590814408	0.666666667	0.484014964
Com_572_pos	N-Acetyl-L-glutamic acid	0.71	C7H11NO5	189.166	Amino Acid And Its Derivatives	"1188-37-0"	10220000	7076000	10470000	1868000	3348000	15310000	1.352723375	0.435866846	0.386621868	0.666666667	0.815406649
Com_573_pos	N4-Acetylcytidine	4.38	C11H15N3O6	285.253	Nucleotide And Its Derivates	"3768-18-1"	8374	18040	4228	5861	21697	53220	0.379335958	-1.398451962	0.370625882	0.777777778	0.791423396
Com_574_pos	Metanephrine	15.12	C10H15NO3	197.231	Phenols And Its Derivatives	"5001-33-2"	1096000	257700	1249000	18860	23360	979900	2.546374203	1.348444446	0.21682616	0.888888889	1.032918638
Com_575_pos	Ethambutol	0.81	C10H24N2O2	204.31	Amines	"74-55-5"	798700	598900	748100	27120	1717000	3654000	0.397490237	-1.331008668	0.885888132	0.666666667	0.363125313
Com_576_pos	Quinine	5.86	C20H24N2O2	324.417	Others	"130-95-0"	79360	137400	78270	346100	230800	928700	0.195955101	-2.351404966	0.051802011	1	1.385005729
Com_577_pos	Melamine	0.9	C3H6N6	126.12	Others	"108-78-1"	127900	68160	144800	74480	173200	1522000	0.192611094	-2.376237297	0.417690217	0.777777778	0.805604919
Com_578_pos	Tubercidin	2.153	C11H14N4O4	266.25	Others	"69-33-0"	30007	50839	25206	120400	7748	38360	0.636918346	-0.650819666	0.979120032	0.555555556	0.147027648
Com_579_pos	2,6-Dimethoxybenzoic acid	6.92	C9H10O4	182.17	Benzoic Acid And Its Derivatives	"1466-76-8"	2203755	1490350	2301480	6203000	142000	556600	0.868723919	-0.203030334	0.496375463	0.666666667	0.650010486
Com_57_neg	N-Propionylglycine	2.08	C5H9NO3	131.13	Amino Acid And Its Derivatives	"21709-90-0"	24610	17690	24890	3586	10575	16350	2.202156599	1.138917065	0.162464622	1	1.164881819
Com_580_pos	2,5-Furandicarboxylate	1.09	C6H4O5	156.09	Organic Acid And Its Derivatives	"3238-40-2"	6947000	4518000	11730000	14250	304514	2032266	9.865888568	3.302448993	0.128924563	1	1.246527003
Com_581_pos	4-Methyl-2-pentanone	1.2	C6H12O	100.16	Ketones	"108-10-1"	10950000	8602000	9155000	1421957	4940000	15660000	1.303562622	0.38245989	0.426376483	0.666666667	0.77170338
Com_582_pos	1,4-Naphthoquinone	1.082	C10H6O2	158.153	Others	"130-15-4"	237000	136300	350100	161212	1001762	754800	0.377208159	-1.406567213	0.300795182	0.777777778	0.900325811
Com_583_pos	S-Lactoyglutathione	2.65	C13H21N3O8S	379.386	Amino Acid And Its Derivatives	"25138-66-3"	14010	16038	8909	25910	24101	35630	0.454887262	-1.136419059	0.025335427	1	1.422793454
Com_584_pos	N-glycyl-L-proline	2.45	C5H10N2O4	162.144	Amino Acid And Its Derivatives		26620	10250	28700	10250	1003000	116600	0.058034252	-4.106951547	0.332139872	0.722222222	0.865491326
Com_585_pos	Isophorone	0.71	C9H14O	138.207	Ketones	"78-59-1"	139300	247400	144000	29110	201600	171500	1.319459984	0.399947597	0.486027889	0.444444444	0.646173376
Com_586_pos	Gly-Tyr-Ala	4.16	C14H19N3O5	309.318	Amino Acid And Its Derivatives	"112898-27-8"	215100	137900	179000	273570	4420000	351100	0.10545784	-3.245261747	0.240430476	1	1.014427667
Com_587_pos	All-cis-4,7,10,13,16-docosapentaenoic acid	13.78	C22H34O2	330.504	Fatty Acyls	"25182-74-5"	29050	23000	27950	43740	36610	169771	0.319845195	-1.644554285	0.204541275	1	1.123501175
Com_588_pos	1,4-Diaminobutane	0.699	C4H12N2	88.15	Polyamine	"110-60-1"	5059000	2831000	4959000	105000	1652000	3364000	2.509080258	1.327158619	0.267419353	0.888888889	0.986305465
Com_589_pos	L-Kynurenine	3.821	C10H12N2O3	208.21	Amino Acid And Its Derivatives	"2922-83-0"	819300	631700	955600	25810	2405000	4313000	0.356860588	-1.486567518	0.911062053	0.666666667	0.34956663
Com_58_neg	O-Desmethylnaproxen	11.86	C13H12O3	216.233	Benzene and substituted derivatives	"52079-10-4"	12760	11810	14290	644600	21710	429200	0.035472063	-4.817172942	0.131466098	1	1.248715738
Com_590_pos	1,3-Dimethyluracil	4.463	C6H8N2O2	140.14	Organoheterocyclic compounds	"874-14-6"	10370	6651	17680	4501	9926	52520	0.5183354	-0.948042169	0.79980001	0.555555556	0.441974179
Com_591_pos	Phenylacetylglycine	6.322	C10H11NO3	193.2	Amino Acid And Its Derivatives	"500-98-1"	5189	2941	11600	38550	86512	317100	0.044621655	-4.486112182	0.022371317	1	1.452071753
Com_592_pos	Phenylacetylglutamine	5.889	C13H16N2O4	264.28	Amino Acid And Its Derivatives	"28047-15-6"	22380	5874	28050	11340	56390	23320	0.618385502	-0.693421598	0.527169606	0.666666667	0.550647903
Com_593_pos	3-Ureidopropionate	1.07	C4H8N2O3	132.12	Organic Acid And Its Derivatives	"462-88-4"	116500000	94330000	113100000	1123000	3506768	1851000	49.98327359	5.643373487	0.005184546	1	1.583809782
Com_594_pos	5-Methyluridine	3.706	C10H14N2O6	258.23	Nucleotide And Its Derivates	"1463-10-1"	81520	170800	60130	74110	104100	1605000	0.175217725	-2.512779367	0.458427348	0.666666667	0.727452508
Com_595_pos	Methyl nicotinate	5.678	C7H7NO2	137.14	Vitamins	"93-60-7"	38530	72690	53610	370600	10410000	55920000	0.002471192	-8.660577084	0.08288202	1	1.384925067
Com_596_pos	Methyl (indol-3-yl)acetate	9.373	C11H11NO2	189.21	Indole And Its Derivatives	"1912-33-0"	6506	9065	15830	8353000	3097000	1344000	0.002454354	-8.670441169	0.002498696	1	1.57270169
Com_597_pos	LysoPC 18:0	13.8	C26H54NO7P	523.36	Phospholipid		883400	153800	1943000	32260	19280	184000000	0.016192204	-5.948556858	0.93502911	0.666666667	0.34392181
Com_598_pos	D-Glucosamine	0.72	C6H13NO5	179.172	Amino Acid And Its Derivatives	"3416-24-8"	94380	71650	81300	9021	27860	71250	2.28731816	1.193657055	0.194368329	1	1.124096983
Com_599_pos	Pseudouridine	1.46	C9H12N2O6	244.201	Nucleotide And Its Derivates	"1445-07-4"	73480	108100	69810	220166	22100	481400	0.347384014	-1.525396729	0.65664956	0.666666667	0.419771879
Com_59_neg	Nelarabine	4.11	C11H15N5O5	297.267	Others	"121032-29-9"	1019000	1704000	820400	3366	3528	671900	5.220140426	2.384088617	0.146869954	1	1.214933331
Com_5_neg	1,5-Anhydro-D-Glucitol	1.11	C6H12O5	164.156	Sugar Alcohols	"154-58-5"	178913	175900	165700	469300	216600	213900	0.578476328	-0.789670171	0.207665914	1	1.095212063
Com_600_pos	O-Acetyl-L-carnitine	1.45	C9H17lNO4	203.236	Carnitine	"3040-38-8"	12440000	10640000	14910000	119397	875323	3709000	8.076586191	3.013745624	0.10245936	1	1.320085719
Com_601_pos	Thymine	7.29	C5H6N2O2	126.113	Nucleotide And Its Derivates	"65-71-4"	12370	23150	19275	67775	51180	82060	0.272591598	-1.875187002	0.006064528	1	1.517518609
Com_602_pos	XMP	1.43	C10H11N4O9P--	362.19	Nucleotide And Its Derivates	"523-98-8"	50580	33530	41240	27685	16285	29900	1.696899959	0.762901513	0.083673657	1	1.241039157
Com_603_pos	Tyramine	1.98	C8H11NO	137.179	Benzene and substituted derivatives	"51-67-2"	17040000	10110000	15410000	134800	750500	4783000	7.508424042	2.908510129	0.105059168	1	1.306957187
Com_604_pos	2-Phenylethylamine	4.56	C8H11N	121.18	Polyamine	"64-04-0"	5811000	3594000	6288000	106800	2946000	3639000	2.345108939	1.229654943	0.299733387	0.888888889	0.932774188
Com_605_pos	Dimethyl phthalate	9.12	C10H10O4	194.18	Organic Acid And Its Derivatives	"131-11-3"	1316000	1265000	937200	1499000	1025000	66050000	0.051305159	-4.284752275	0.405178075	0.777777778	0.813442137
Com_606_pos	Dibutyl phthalate	13.61	C16H22O4	278.34	Organic Acid And Its Derivatives	"84-74-2"	3574000	2962000	2685000	4405000	4009000	22920000	0.294280973	-1.76473383	0.25681941	1	1.033161855
Com_607_pos	Dl-Threitol	0.69	C4H10O4	122.12	Sugar Alcohols	"7493-90-5"	12500000	9841000	13650000	1405000	2856000	18770000	1.562719812	0.644059134	0.312181941	0.666666667	0.926507792
Com_608_pos	Dl-Tropic acid	4.09	C9H10O3	166.174	Organic Acid And Its Derivatives	"28845-94-5"	25680000	17360000	25380000	3228738	5571000	15950000	2.764473709	1.467004851	0.111746428	1	1.267730521
Com_609_pos	D-Myo-inositol 4-monophosohate	0.92	C6H13O9P	260.136	Alcohols and polyols	"46495-39-0"	288400	179900	276500	24840	664500	1469000	0.345080015	-1.53499717	0.901809943	0.666666667	0.378618714
Com_60_neg	N-Oleoyl Glycine	14.62	C20H37NO3	339.513	Organic Acid And Its Derivatives	"2601-90-3"	8390	3660	8792	2940	32261	3859000	0.005352061	-7.545689815	0.37263628	0.666666667	0.876068574
Com_610_pos	Pantothenic acid	4.57	C9H17NO5	219.235	Vitamins	"79-83-4"	16630000	14200000	17750000	1446000	2565696	116700000	0.402446504	-1.313131073	0.638165145	0.666666667	0.536316718
Com_611_pos	Ergosta-5,7,9(11),22-Tetraen-3-beta-Ol	11.13	C28H42O	394.632	Hormones	"516-85-8"	7515000	5706000	5901000	3676000	3690000	17760000	0.761044337	-0.393947591	0.978084921	0.666666667	0.347408936
Com_612_pos	Ergosterol	11.13	C28H44O	396.648	Hormones	"57-87-4"	259300	218700	228100	63460	72520	270600	1.736681588	0.796333267	0.232822419	0.666666667	1.053126006
Com_613_pos	Ergothioneine	1.03	C9H15N3O2S	229.299	Organic Acid And Its Derivatives	"497-30-3"	21560000	19240000	23340000	61750	41060	1184000	49.84418834	5.639353396	0.041785592	1	1.47745281
Com_614_pos	Dl-3-Hydroxynorvaline	0.85	C5H11NO3	133.146	Amino Acid And Its Derivatives	"2280-42-4"	16710000	13210000	17760000	1736000	6667000	73840000	0.579745389	-0.786508655	0.689335864	0.666666667	0.506157715
Com_615_pos	6-Aminohexanoate	2.09	C6H13NO2	131.173	Organic Acid And Its Derivatives	"60-32-2"	200600000	150500000	194800000	501800	12190000	197800000	2.593450196	1.374872665	0.242691681	0.777777778	1.043713491
Com_616_pos	5alpha-Pregnane-3,20-dione	1.86	C21H32O2	316.478	Hormones	"566-65-4"	77190	70950	42370	50870	45190	34610	1.457947501	0.543938771	0.1940428	0.777777778	1.036718621
Com_617_pos	3-Hydroxy-DL-kynurenine	9.78	C10H12N2O4	224.213	Ketones	"484-78-6"	304800	338200	333400	227100	304500	279400	1.203945746	0.267770381	0.146711571	1	1.155626231
Com_618_pos	Thioguanine	18.3	C5H5N5S	167.192	Purines and purine derivatives	"154-42-7"	4757	7678	4445	7748	7236	6199	0.796865411	-0.327592019	0.275905397	0.777777778	0.916216948
Com_619_pos	L-Carnitine	0.87	C7H15NO3	161.2	Carnitine	"541-15-1"	10760000	8529000	11640000	257900	323300	11140000	2.638722998	1.39983991	0.193214259	0.777777778	1.128211482
Com_61_neg	N-Acetylvaline	4.41	C7H13NO3	159.183	Amino Acid And Its Derivatives	"3067-19-4"	3724	4284	4999	1502000	46000	182100	0.007518063	-7.055423368	0.057960403	1	1.429367106
Com_620_pos	Inosine	2.826	C10H12N4O5	268.23	Nucleotide And Its Derivates	"58-63-9"	8242000	9005000	7423000	34670	25010	13330000	1.842463748	0.881636234	0.220467844	0.666666667	1.076718663
Com_621_pos	Estrone	10.548	C18H22O2	270.37	Hormones	"53-16-7"	309900	375400	309400	359600	305900	463000	0.881435534	-0.182073037	0.458366162	0.555555556	0.661618991
Com_622_pos	Hydrocortisone	8.433	C21H30O5	362.46	Hormones	"50-23-7"	1770	34787876	8072	36680	23544	3934	542.3753546	9.083147814	0.646143437	0.555555556	0.439825661
Com_623_pos	Progesterone	12.331	C21H30O2	314.46	Hormones	"57-83-0"	224331	118442	200044	10290	6548	1530000	0.350920394	-1.510784303	0.531093477	0.666666667	0.629046857
Com_624_pos	Nicotinic Acid	1.478	C6H5NO2	123.11	Vitamins	"59-67-6"	13670000	11150000	13660000	104900000	76640000	91710000	0.140823422	-2.828040792	0.000113897	1	1.595948978
Com_625_pos	Nicotinamide	1.539	C6H6N2O	122.12	Vitamins	"98-92-0"	17870000	19250000	17850000	427200	496600	9564000	5.241328019	2.3899324	0.118422883	1	1.28619807
Com_626_pos	Pregnenolone	12.19	C21H32O2	316.48	Hormones	"145-13-1"	125100	111400	129300	46080	33140	7775000	0.046573689	-4.424341029	0.756124904	0.666666667	0.447452322
Com_627_pos	trans-Aconitic acid	11	C6H6O6	174.108	Organic Acid And Its Derivatives	"4023-65-8"	1162000	1212000	1102000	1034000	1074000	1051000	1.100348211	0.137960145	0.059218584	1	1.363228278
Com_628_pos	Trimethyllysine	1.03	C9H21N2O2	189.275	Amino Acid And Its Derivatives	"66989-56-8"	10660000	7875000	11640000	16160	309600	7287000	3.963739826	1.986862269	0.193432659	1	1.132195528
Com_629_pos	Testosterone	0.72	C19H28O2	288.424	Hormones	"58-22-0"	532700	310300	578500	52550	155300	1133000	1.060148413	0.084266246	0.479796723	0.666666667	0.702266786
Com_62_neg	Carbamoylphosphate	0.86	CH2NO5P--	139.004	Organic Acid And Its Derivatives	"590-55-6"	1276000	1513000	1426000	17720	62460	855000	4.507153703	2.17221665	0.145010272	1	1.229391776
Com_630_pos	Tetrahydrocorticosterone	10.33	C21H34O4	350.492	Hormones	"68-42-8"	143445	169065	135064	129700	114000	737200	0.456289122	-1.131979834	0.574721775	0.666666667	0.607050514
Com_631_pos	Styrene	10.53	C8H8	104.149	Benzene and substituted derivatives	"100-42-5"	595900	263700	702300	114522	235860	657165	1.550200636	0.632454949	0.372512105	0.777777778	0.786298324
Com_632_pos	1-Methylhistidine	0.84	C7H11N3O2	169.18	Amino Acid And Its Derivatives	"332-80-9"	1865000	1659000	1884000	22140	59860	108100	28.44818517	4.830264715	0.016085277	1	1.551865614
Com_633_pos	Furfural	0.87	C5H4O2	96.08	Aldehydes	"98-01-1"	43290	37360	43980	19810	1763000	189300	0.063196272	-3.984016734	0.363871336	0.666666667	0.830413156
Com_634_pos	Vidarabine	2.56	C10H13N5O4	267.24	Nucleotide And Its Derivates	"5536-17-4"	455000000	347400000	499800000	2589788	73661500	324000000	3.253456114	1.701973093	0.236498508	1	1.05090776
Com_635_pos	Isonicotinic acid	1.49	C6H5NO2	123.11	Pyridine And Its Derivatives	"55-22-1"	47170000	41700000	50360000	222400000	178500000	194400000	0.233882076	-2.096146791	7.83E-05	1	1.595553776
Com_636_pos	Malathion	10.96	C10H19O6PS2	330.4	Fatty Acyls	"121-75-5"	9587000	10210000	7881000	9425000	9221000	7478000	1.059485531	0.083363885	0.622725075	0.777777778	0.50398423
Com_637_pos	2-Furoylglycine	0.79	C7H7NO4	169.13	Amino Acid And Its Derivatives	"5657-19-2"	463200	434500	452600	201792	15420	503700	1.873044144	0.905384902	0.323920541	0.666666667	0.87488196
Com_638_pos	1-Methylxanthine	4.09	C6H6N4O2	166.14	Purines and purine derivatives	"6136-37-4"	19920	18880	12130	8549	4066	82820	0.533661655	-0.906002743	0.882102281	0.666666667	0.309781712
Com_639_pos	Picolinic acid	1.48	C6H5NO2	123.11	Organoheterocyclic compounds	"98-98-6"	12550000	10830000	13660000	107800000	77450000	90850000	0.134154292	-2.898034884	0.000138116	1	1.595563108
Com_63_neg	Butylmalonic acid	0.7	C7H12O4	160.168	Organic Acid And Its Derivatives	"534-59-8"	21000000	17820000	21800000	3582000	5483000	29740000	1.562169823	0.643551297	0.306514214	0.666666667	0.935773048
Com_640_pos	Phthalate	4.07	C8H6O4	166.13	Benzoic Acid And Its Derivatives	"88-99-3"	22750000	15590000	22340000	78300	4887000	13300000	3.322146365	1.732115636	0.258891226	1	1.00965868
Com_641_pos	Benzoic Acid	7.42	C7H6O2	122.12	Benzoic Acid And Its Derivatives	"65-85-0"	20367	25397	18830	120000	13090	26740	0.404141901	-1.307066159	0.534321405	0.666666667	0.58840164
Com_642_pos	L-allo-Threonine	0.87	C4H9NO3	119.12	Amino Acid And Its Derivatives	"28954-12-3"	29020000	25390000	27120000	1047000	1292000	9135000	7.10563012	2.828962592	0.069815236	1	1.402626918
Com_643_pos	L-allo-Isoleucine	2.28	C6H13NO2	131.17	Amino Acid And Its Derivatives	"1509-34-8"	341000000	281900000	331200000	2384000	146600000	295200000	2.147983718	1.102983058	0.331505206	0.888888889	0.893527957
Com_644_pos	Hexanoyl Glycine	6.89	C8H15NO3	173.21	Amino Acid And Its Derivatives	"24003-67-6"	5144	7585	1441	14950	21828	22510	0.239002834	-2.064900372	0.075118569	1	1.356296623
Com_645_pos	Asp-glu	0.96	C9H14N2O7	262.217	Amino Acid And Its Derivatives	"6157-06-8"	2056000	1718000	2219000	17350	135100	928600	5.543684381	2.470845123	0.140158159	1	1.239052126
Com_646_pos	Asp-Phe methyl ester	5.36	C14H18N2O5	294.303	Organic Acid And Its Derivatives	"22839-47-0"	15840000	8952000	16610000	62020	7038000	15340000	1.845007268	0.8836265	0.374002163	0.888888889	0.828919487
Com_647_pos	All-Trans-13,14-Dihydroretinol	10.11	C20H32O	288.467	Vitamins	"115797-14-3"	8250	96550	87223	108100	180100	662000	0.202086929	-2.306952083	0.156626937	1	1.090469671
Com_648_pos	Allopurinol	2.69	C5H4N4O	136.111	Nucleotide And Its Derivates	"315-30-0"	7838000	6849000	8113000	119911	918172	11040000	1.887716784	0.916642332	0.272480849	0.666666667	0.994646393
Com_64_neg	ATP	1.04	C10H16N5O13P3	507.181	Nucleotide And Its Derivates	"56-65-5"	36300	10220	49890	23593	27795	4225	1.733587471	0.793760632	0.460774945	0.777777778	0.6532166
Com_650_pos	5 methyl THF	4.48	C5H10O	86.132	Organoheterocyclic compounds		6821	92010	4731	29355	37776	182600	0.414694211	-1.269880187	0.281270824	0.777777778	0.882850793
Com_651_pos	PC(16:0/16:0)	18.3	C40H80NO8P	734.051	Phospholipid	"63-89-8"	46470	64740	62930	27420	19600	33200	2.170780354	1.118213757	0.017443264	1	1.449602002
Com_652_pos	2-Oxo-3-methyl-butyrate	0.7	C5H8O3	116.11	Esters		12960	10204	25410	6422	16610	49904	0.665981134	-0.586446786	0.830213224	0.555555556	0.417577937
Com_653_pos	2-Methylsuccinic Acid	0.94	C5H8O4	132.115	Organic Acid And Its Derivatives	"498-21-5"	105697	39410	87400	82410	152000	362200	0.389713548	-1.359514008	0.192602519	0.777777778	1.055871999
Com_654_pos	Noradrenaline	6.36	C8H11NO3	169.178	Hormones	"51-41-2"	242600	63730	76100	859800	36760	202000	0.348119356	-1.522346061	0.615687393	0.555555556	0.443310503
Com_655_pos	N-carbamoyl-L-aspartate	0.9	C5H8N2O5	176.127	Amino Acid And Its Derivatives	"13184-27-5"	481500	490900	443800	58090	274300	1100000	0.988697212	-0.01639933	0.55538577	0.666666667	0.624202781
Com_656_pos	Methyl EudesMate	9.5	C11H14O5	226.23	Benzoic Acid And Its Derivatives	"1916-07-0"	303078	242078	248992	16940	1302000	538159	0.427628252	-1.225570923	0.92357241	0.666666667	0.27991635
Com_657_pos	Pyridoxine	1.563	C8H11NO3	169.178	Pyridine And Its Derivatives	"65-23-6"	8357000	6713000	8861000	110000	676300	39140000	0.599379356	-0.738458699	0.427847246	0.666666667	0.770807665
Com_658_pos	Dopamine HCl	1.5	C8H12ClNO2	189.64	Phenols And Its Derivatives	"62-31-7"	61030	47900	36020	44334	230182	227600	0.288678313	-1.792465364	0.193919613	0.777777778	1.11617321
Com_659_pos	Epinephrine bitartrate	14.86	C13H19NO9	333.29	Hormones	"51-42-3"	36520	8741	32350	4873	4137	59580	1.13152063	0.178262888	0.515399418	0.666666667	0.617166313
Com_65_neg	Anthranilic acid	1.44	C7H7NO2	137.14	Benzoic Acid And Its Derivatives	"118-92-3"	10670	15040	14530	15550	29148	31490	0.528167165	-0.920933479	0.096312888	1	1.263989978
Com_660_pos	L-Serine	0.846	C3H7NO3	105.093	Amino Acid And Its Derivatives	"56-45-1"	4563000	5627000	4136000	1749000	191100	860300	5.115697757	2.35493103	0.091714119	1	1.340199709
Com_661_pos	Hypoxanthine	1.509	C5H4N4O	136.11	Nucleotide And Its Derivates	"68-94-0"	2701000	2552000	2862000	66440	467900	11350000	0.682831356	-0.550398785	0.465151521	0.666666667	0.726128756
Com_662_pos	L-Glutamate	0.886	C5H9NO4	147.129	Amino Acid And Its Derivatives	"56-86-0"	271500000	331400000	274400000	1766000	1427000	240800000	3.595594956	1.84623051	0.168883159	1	1.176142085
Com_663_pos	D-2-Aminobutyric acid	0.947	C4H9NO2	103.12	Organic Acid And Its Derivatives	"2623-91-8"	26400000	26140000	23730000	148800	1092000	21620000	3.336278695	1.738239809	0.190956186	1	1.138324368
Com_664_pos	DL-Norvaline	1.068	C5H11NO2	117.15	Amino Acid And Its Derivatives	"760-78-1"	387700000	316500000	384800000	888200	15230000	266000000	3.860084177	1.948632309	0.194631429	1	1.131106656
Com_665_pos	Methionine	1.46	C5H11NO2S	149.211	Amino Acid And Its Derivatives	"59-51-8"	95160000	53270000	80560000	59890	18700000	49330000	3.363054339	1.74977209	0.291762209	1	0.95380603
Com_666_pos	3-Aminoisobutyric acid	0.931	C4H9NO2	103.12	Amino Acid And Its Derivatives	"144-90-1"	21350000	20350000	19790000	101700	239000	7633000	7.711601891	2.947030575	0.113232824	1	1.299522856
Com_667_pos	Anserine	0.771	C10H16N4O3	240.26	Organic Acid And Its Derivatives	"584-85-0"	27210	16450	16520	5694	8074	26640	1.489309048	0.57464316	0.3286957	0.777777778	0.870464514
Com_668_pos	(S)-2-Aminobutanoate	0.947	C4H9NO2	103.12	Amino Acid And Its Derivatives	"1492-24-6"	25870000	25120000	23930000	276000	1984000	36370000	1.939425317	0.955629222	0.257812336	0.666666667	1.018939845
Com_669_pos	LysoPC 20:2	13.26	C28H54NO7P	547.36	Phospholipid		505700	107900	847600	28380	145870	14380000	0.100396791	-3.316214933	0.969089561	0.555555556	0.379462975
Com_66_neg	Alloxan	0.7	C4H4N2O5	160.085	Organoheterocyclic compounds	"2244-11-3"	55100000	44200000	54200000	10730000	13280000	72880000	1.584270823	0.663818977	0.296327862	0.666666667	0.947938108
Com_670_pos	1-Aminocyclopropane-1-carboxylic acid	0.89	C4H7NO2	101.048	Amino Acid And Its Derivatives	"22059-21-8"	4291000	4412000	4004000	125300	135100	2038000	5.528628611	2.466921661	0.107507416	1	1.310947963
Com_671_pos	Levodopa	1.019	C9H11NO4	197.19	Amino Acid And Its Derivatives	"59-92-7"	13710000	9964000	14180000	80230	57820	9508000	3.92430062	1.972435563	0.162666756	1	1.187466186
Com_672_pos	Betaine	0.907	C5H11NO2	117.15	Organic Acid And Its Derivatives	"107-43-7"	327900000	341400000	346200000	5968000	13100000	250100000	3.772736729	1.915611429	0.15594238	1	1.206803733
Com_673_pos	Choline Hydroxide	0.828	C5H15NO2	121.18	Cholines	"123-41-1"	129600000	127100000	125900000	3483000	42210000	289100000	1.142795698	0.19256751	0.417657059	0.666666667	0.783399806
Com_674_pos	Trimethylamine N-oxide	0.872	C3H9NO	75.11	Polyamine	"1184-78-7"	38350	33590	51780	478100	219200	2182000	0.042968777	-4.54056747	0.052157309	1	1.446199053
Com_675_pos	S-Adenosyl-L-methionine	0.8	C15H22N6O5S	398.44	Amino Acid And Its Derivatives	"29908-03-0"	189900	142700	171300	115734	77770	131291	1.551440139	0.633608033	0.082539193	1	1.263306509
Com_676_pos	Kojic acid	2.388	C6H6O4	142.11	Organoheterocyclic compounds	"501-30-4"	87795	91098	95848	404500	105900	29620	0.508760787	-0.974940617	0.844593023	0.666666667	0.409699435
Com_677_pos	Pipecolic acid	1.042	C6H11NO2	129.16	Organic Acid And Its Derivatives	"535-75-1"	404400000	337300000	450000000	3503610	23948760	217019300	4.874593445	2.285281899	0.150434154	1	1.217240894
Com_678_pos	Azelaic acid	7.433	C9H16O4	188.22	Fatty Acyls	"123-99-9"	238600	228100	400100	29160000	38690	30340000	0.0145586	-6.101984515	0.383376701	0.666666667	0.778805635
Com_679_pos	gamma-Glutamylglutamic acid	1.05	C10H16N2O7	276.243	Amino Acid And Its Derivatives	"1116-22-9"	18370000	7123000	18450000	7047	57660	5331000	8.144067126	3.025749453	0.137613703	1	1.233449237
Com_67_neg	allantoate	1.06	C4H8N4O4	176.131	Organic Acid And Its Derivatives		536100	426600	618900	26030	19080	1494000	1.027606864	0.039288432	0.338732837	0.666666667	0.879437063
Com_680_pos	beta-Nicotinamide adenine dinucleotide phosphate	1.03	C21H29N7O17P3	744.41	Nucleotide And Its Derivates	"53-59-8"	3364000	4654000	4434000	1889519	496742	3520030	2.108260497	1.076053138	0.218356603	0.888888889	1.050798548
Com_681_pos	L-Pipecolate	1.049	C6H11NO2	129.16	Amino Acid And Its Derivatives	"3105-95-1"	69140000	59840000	71340000	101200	76000	3793000	50.45589643	5.656950972	0.050410007	1	1.45408412
Com_682_pos	gamma-Nonanolactone	4.1	C9H16O2	156.222	Esters	"104-61-0"	4699000	3131000	4469000	103260	1078000	3004000	2.938646583	1.555151864	0.218145683	1	1.079160015
Com_683_pos	UDP-N-acetylglucosamine	0.99	C17H27N3O17P2	607.354	Nucleotide And Its Derivates	"528-04-1"	251800	430100	260000	112665	267622	21920	2.341828959	1.227635709	0.226435065	0.777777778	1.059527668
Com_684_pos	Choline Chloride	0.83	C5H14ClNO	139.62	Cholines	"67-48-1"	90050000	89770000	90020000	2207000	25280000	320600000	0.775208497	-0.367343711	0.480662008	0.666666667	0.707611362
Com_685_pos	Oxaceprol	1.5	C7H11NO4	173.17	Amino Acid And Its Derivatives	"33996-33-7"	275900	250000	224600	13900	25680	358583	1.884906433	0.91449291	0.249732498	0.666666667	1.028719199
Com_686_pos	1-Methylguanine	4.03	C6H7N5O	165.153	Nucleotide And Its Derivates	"938-85-2"	589600	624700	413900	220638	309687	606900	1.431730748	0.517760204	0.281222711	0.777777778	0.921495461
Com_687_pos	9-Aminoacridine	6.03	C13H10N2	194.23	Quinolines and derivatives	"90-45-9"	22443	49637	22507	122500	53630	75271	0.376239554	-1.41027657	0.050004897	1	1.303843073
Com_688_pos	Serotonin	2.94	C10H12N2O	176.215	Indole And Its Derivatives	"50-67-9"	6343895	4439042	7645023	44270	16560	178800000	0.103029601	-3.278869199	0.49038405	0.666666667	0.67516648
Com_689_pos	1-Palmitoyl-Sn-Glycero-3-Phosphocholine	12.52	C24H50NO7P	495.63	Phospholipid	"17364-16-8"	7156000	1685000	13400000	200300	253500	568200000	0.03911167	-4.676257037	0.848584281	0.666666667	0.382165188
Com_68_neg	cis-4-Hydroxy-D-proline	2.26	C5H9NO3	131.13	Organic Acid And Its Derivatives	"2584-71-6"	1166000	837300	1073000	3022	308700	629300	3.269105292	1.708895844	0.274180047	1	0.983161465
Com_690_pos	1-Stearoyl-Sn-Glycerol-3-Phosphocholine	13.78	C26H54NO7P	523.683	Phospholipid	"19420-57-6"	680300	129400	1402000	10460	20160	139200000	0.015885155	-5.976177009	0.891685147	0.666666667	0.37162378
Com_691_pos	2-(3,4-dimethoxyphenyl)ethanamine	1.81	C10H15NO2	181.232	Benzene and substituted derivatives	"120-20-7"	113100000	85860000	104300000	504400	36300000	164900000	1.503487281	0.588312664	0.379761826	0.666666667	0.828447982
Com_692_pos	2-(Dimethylamino)Guanosine	4.57	C12H17N5O5	311.294	Nucleotide And Its Derivates	"2140-67-2"	700700	871600	711500	5777	123900	4000000	0.553021459	-0.854592632	0.46906672	0.666666667	0.720075319
Com_693_pos	1-Methylguanosine	4.04	C11H15N5O5	297.267	Nucleotide And Its Derivates	"2140-65-0"	2773000	3446000	2163000	238539	60840	3484000	2.215479866	1.147619216	0.23275595	0.666666667	1.040086468
Com_694_pos	1-Methylnicotinamide	2.68	C7H9N2O+	137.159	Pyridine And Its Derivatives	"3106-60-3"	3833000	3221000	3739000	339400	818614	5376000	1.651817703	0.724054478	0.29531862	0.666666667	0.956698744
Com_695_pos	1-Oleoyl-Sn-Glycero-3-Phosphocholine	12.82	C26H52NO7P	521.667	Phospholipid	"19420-56-5"	124900000	39470000	164600000	431500	566600	475200000	0.69082594	-0.533605839	0.325830073	0.666666667	0.893889312
Com_696_pos	L-Hydroxylysine	0.9	C6H14N2O3	163.195	Amino Acid And Its Derivatives	"1190-94-9"	501100	220000	493200	116300	365100	6187000	0.182097655	-2.457215754	0.703490491	0.555555556	0.51991293
Com_697_pos	Dl-Dihydrosphingosine	10.41	C18H39NO2	301.508	Alcohols and polyols	"3102-56-5"	2882000	2602000	3144000	2181000	5162000	16670000	0.359305376	-1.476717572	0.361404446	0.666666667	0.894244724
Com_698_pos	DL-Leucine	2.3	C6H13NO2	131.173	Amino Acid And Its Derivatives	"328-39-2"	56820000	45160000	55440000	182600	15890000	51250000	2.33829353	1.225456045	0.314274389	0.888888889	0.922013921
Com_699_pos	Dl-Indole-3-lactic acid	4.87	C11H11NO3	205.21	Organic Acid And Its Derivatives	"832-97-3"	148100000	100700000	148800000	955200	28310000	367000000	1.003368451	0.004851481	0.405269862	0.666666667	0.799184016
Com_69_neg	cholesteryl sulfate	0.94	C27H46O4S	466.717	Hormones	"1256-86-6"	107600	60620	111900	111065	54880	97326	1.063998693	0.089496379	0.825425681	0.666666667	0.187688578
Com_6_neg	1,3-Dimethyluric Acid	11.3	C7H8N4O3	196.163	Organic Acid And Its Derivatives	"944-73-0"	15400	16950	18050	17130	17300	13080	1.060829299	0.085192527	0.571666897	0.444444444	0.582686799
Com_700_pos	Acetylcysteine	15.04	C5H9NO3S	163.195	Amino Acid And Its Derivatives	"616-91-1"	11810	9056	12570	8738	13410	156500	0.187161345	-2.417645592	0.435055281	0.666666667	0.789679039
Com_701_pos	Dl-Norleucine	0.9	C6H13NO2	131.173	Amino Acid And Its Derivatives	"616-06-8"	350800000	327100000	348000000	5695000	12070000	271300000	3.549028765	1.827424268	0.163159418	1	1.191901712
Com_702_pos	N-acetyl-glutamate	1.67	C7H11NO5	189.166	Amino Acid And Its Derivatives		29390000	20100000	31590000	17740000	6840000	51450000	1.06642115	0.092777298	0.598840749	0.666666667	0.507076685
Com_703_pos	N-Acetylglycine	0.9	C4H7NO3	117.103	Amino Acid And Its Derivatives	"543-24-8"	375100000	350700000	351400000	6272000	12970000	284600000	3.545263657	1.825892923	0.162640208	1	1.192863562
Com_704_pos	N-Acetylhistamine	2.73	C7H11N3O	153.182	Amino Acid And Its Derivatives	"673-49-4"	411900	381200	332800	156162	312547	190900	1.706920312	0.771395707	0.097688663	1	1.284265852
Com_705_pos	N-Acetylmannosamine	1.02	C8H15NO6	221.208	Amino Acid And Its Derivatives	"3615-17-6"	5273000	2621000	2709000	37690	64110	6178000	1.688429568	0.755681999	0.246826918	0.666666667	1.025850888
Com_706_pos	N-Acetylthreonine	1.74	C6H11NO4	161.156	Amino Acid And Its Derivatives	"17093-74-2"	8954000	7624000	10500000	289500	87630	6931000	3.705188605	1.889546982	0.16691118	1	1.174502017
Com_707_pos	Feruloyl Putrescine	15.1	C14H20N2O3	264.32	Phenolamides	"501-13-3"	1979000	507800	2083000	29520	31030	1458000	3.0093181	1.589436615	0.189694822	0.888888889	1.087396669
Com_708_pos	N-Formylkynurenine	4.2	C11H12N2O4	236.224	Organic Acid And Its Derivatives	"1022-31-7"	848900	463300	835300	414613	1486000	92120	1.077665698	0.10790971	0.545829185	0.666666667	0.581044063
Com_709_pos	Tryptamine	5.33	C10H12N2	160.22	Indole And Its Derivatives	"61-54-1"	44930	36390	241200	208400	129828	11650000	0.026903059	-5.21608599	0.255575798	0.777777778	0.987258732
Com_70_neg	7Z, 10Z, 13Z, 16Z, 19Z-docosapentaenoic acid	10.26	C22H34O2	330.504	Fatty Acyls	"24880-45-3"	692400	400700	541900	431461	185308	443131	1.542598358	0.625362481	0.233843918	0.777777778	0.951527707
Com_710_pos	L-Lysinamide	4.91	C6H15N3O	145.2	Amino Acid And Its Derivatives	"32388-19-5"	13000000	8037000	11850000	95710	2159000	53890000	0.585754206	-0.771632688	0.481128768	0.666666667	0.707438379
Com_711_pos	N-Acetyl-5-hydroxytryptamine	2.63	C12H14N2O2	218.25	Indole And Its Derivatives	"1210-83-9"	233000	169700	302300	35710	3136	113400	4.630663531	2.211218933	0.160582857	1	1.170819964
Com_712_pos	Caffeylalcohol	2.28	C20H28O3	316.4	Organoheterocyclic compounds	"469-83-0"	146600	86210	144900	166604	31140	95850	1.286504493	0.363456495	0.478418607	0.555555556	0.62311356
Com_713_pos	N-P-Coumaroyl Spermidine	3.13	C16H25N3O2	291.394	Phenolamides		19833	14758	14781	19940	52740	12060	0.582629219	-0.779350041	0.497320382	0.666666667	0.60850876
Com_714_pos	N-Sinapoyl Putrescine	4.94	C15H22N2O4	294.346	Phenolamides		2868	57414	26151	44640	14230	487100	0.158310896	-2.659167538	0.359498481	0.666666667	0.764947641
Com_715_pos	N-gamma-Acetyl-N-2-Formyl-5-Methoxykynurenamine	6.03	C13H16N2O4	264.277	Ketones	"52450-38-1"	23774	47403	27498	11040	108200	99570	0.450962022	-1.148922154	0.614869311	0.666666667	0.534598716
Com_716_pos	Phosphoethanolamine	0.86	C2H8NO4P	141.063	Organic Acid And Its Derivatives	"1071-23-4"	210400	247200	186400	6174	11120	102500	5.375895287	2.426505037	0.105022863	1	1.313310172
Com_717_pos	Calcium phosphorylcholine chloride	0.87	C5H13NO4P.Ca.Cl	257.666	Cholines	"4826-71-5"	9054000	9521000	8858000	72540	82240	7682000	3.500544867	1.807579498	0.168962486	1	1.177837348
Com_718_pos	Pyridoxine O-Glucoside	0.99	C14H21NO8	331.127	Pyridine And Its Derivatives		517100	747700	633300	905519	699200	46180000	0.039721904	-4.653921428	0.36057283	0.888888889	0.876494764
Com_719_pos	Sotalol	10.15	C12H20N2O3S	272.364	Benzene and substituted derivatives	"3930-20-9"	25011	49265	1752	168100	62027	86790	0.239898775	-2.059502306	0.179578846	1	1.10508837
Com_71_neg	6-Phospho-D-glucono-1,5-lactone	0.97	C6H11O9P	258.12	Sugar Acids And Its Derivatives	"2641-81-8"	1994000	1203000	1590000	9746	641800	260700	5.247488068	2.391626981	0.177685426	1	1.146683634
Com_720_pos	Cyprodinil	9.02	C14H15N3	225.289	Benzene and substituted derivatives	"121552-61-2"	466800	475500	508600	1051000	634400	919100	0.557074294	-0.844058349	0.060897425	1	1.410613212
Com_721_pos	N-Methyl-a-aminoisobutyric acid	1.22	C5H11NO2	117.146	Organic Acid And Its Derivatives	"2566-34-9"	400100000	327300000	401500000	1231000	15540000	266200000	3.98945475	1.996191583	0.185488913	1	1.148554746
Com_722_pos	Niflumic Acid	15.12	C13H9F3N2O2	282.218	Others	"4394-00-7"	3697000	610200	3649000	39420	27620	37190000	0.213548902	-2.227361612	0.532552943	0.666666667	0.623222869
Com_723_pos	N��-(1-Carboxymethyl)-L-lysine	0.84	C8H16N2O4	204.224	Amino Acid And Its Derivatives	"5746-04-3"	2469000	1431000	2252000	86160	96250	3546000	1.650033124	0.722494987	0.264704073	0.666666667	0.994900451
Com_724_pos	N alpha-Acetyl-L-lysine	1.03	C8H16N2O3	188.224	Amino Acid And Its Derivatives	"1946-82-3"	7514000	6096000	7842000	602388	2338757	6579888	2.253116862	1.171922144	0.219140727	0.888888889	1.080818909
Com_725_pos	Oxymetazoline	5.06	C16H24N2O	260.375	Benzene and substituted derivatives	"1491-59-4"	21510000	16600000	30680000	60600000	7252000	48730000	0.590056784	-0.761074296	0.775713866	0.666666667	0.254549673
Com_726_pos	N��,N��,N��-trimethyllysine	0.76	C9H20N2O2	188.267	Amino Acid And Its Derivatives	"19253-88-4"	27380000	25400000	27750000	2244000	4806000	32710000	2.025402414	1.018208576	0.2360962	0.666666667	1.055143347
Com_727_pos	19-Norethisterone	15.11	C20H26O2	298.419	Others	"68-22-4"	27720	30270	60140	11030	14670	94260	0.984744915	-0.022178033	0.622998092	0.666666667	0.531007639
Com_728_pos	N-Methyl-L-arginine hydrochloride	0.95	C7H16N4O2	188.23	Amino Acid And Its Derivatives	"156706-47-7"	1310000	1127000	1169000	32280	3011000	726700	0.956503748	-0.064157473	0.509825908	0.666666667	0.621248152
Com_729_pos	N-Tetradecanamide	13.59	C14H29NO	227.386	Fatty Acyls	"638-58-4"	746300	211400	883500	57550	76780	1340000	1.248838455	0.320586868	0.414716745	0.666666667	0.745619272
Com_72_neg	6-Phospho-D-gluconate	0.98	C6H13O10P	276.135	Sugar Acids And Its Derivatives	"921-62-0"	43820000	17440000	37230000	39870	1234000	106000	71.37628907	6.157372991	0.029474377	1	1.485434713
Com_730_pos	P-Coumaroyl Agmatine	12.1	C14H20N4O2	276.334	Phenolamides	"7295-86-5"	1134000	1200000	1178000	888300	1018000	2602000	0.779007608	-0.360290676	0.741482617	0.666666667	0.475523463
Com_731_pos	3-Methylxanthine	1.83	C6H6N4O2	166.14	Purines and purine derivatives	"1076-22-8"	79800	54840	43330	66107	18390	89240	1.024364413	0.034729039	0.746244428	0.555555556	0.295110966
Com_732_pos	5,6-Dihydro-5-methyluracil	0.69	C5H8N2O2	128.13	Pyrimidines and pyrimidine derivatives	"696-04-8"	3425000	2315000	2979000	105800	310000	97010	17.00239855	4.087666378	0.010198247	1	1.554722028
Com_733_pos	N-Methylnicotinamine	1.82	C7H8N2O	136.15	Pyridine And Its Derivatives	"114-33-0"	145800	111700	135000	430911	59230	243800	0.534784131	-0.902971438	0.617287809	0.666666667	0.450679273
Com_734_pos	Trigonelline	0.94	C7H7NO2	137.14	Alkaloids and derivatives	"535-83-1"	137500	119400	315300	438000	2349000	100400000	0.005545272	-7.494526011	0.172451904	1	1.187331659
Com_735_pos	Sphinganine	10.37	C18H39NO2	301.513	Phospholipid	"764-22-7"	2398000	2083000	2540000	1657000	4171000	14240000	0.349860474	-1.51514841	0.387410639	0.666666667	0.859167472
Com_736_pos	3-Phenoxypropionic acid	13.5	C9H10O3	166.176	Fatty Acyls	"7170-38-9"	94000	97430	93560	95110	108400	236000	0.648426657	-0.624984693	0.344781528	0.888888889	0.910744319
Com_737_pos	2-Piperidinone	4.15	C5H9NO	99.132	Organoheterocyclic compounds	"675-20-7"	163300	75910	229100	48510	86320	532200	0.702082365	-0.510287804	0.925647917	0.555555556	0.369223846
Com_738_pos	Phloretate	4.05	C9H10O3	166.177	Fatty Acyls	"501-97-3"	142700000	96270000	138400000	520400	32190000	84830000	3.21055569	1.682823024	0.263754976	1	1.001190079
Com_739_pos	Alpha-Linolenic acid	12.64	C18H30O2	278.435	Eicosanoid	"463-40-1"	2183000	1906000	2359000	247400	151100	60150000	0.106493142	-3.231167571	0.821906196	0.666666667	0.378764043
Com_73_neg	acetoacetate	1.69	C4H6O3	102.089	Organic Acid And Its Derivatives	"541-50-4"	111700	79150	122900	122500	64171	53080	1.30864939	0.388078626	0.345481873	0.777777778	0.835078964
Com_740_pos	3-Methylindole	4.87	C9H9N	131.177	Indole And Its Derivatives	"83-34-1"	1936000	1300000	1903000	12220	433700	9125000	0.536938978	-0.897169958	0.507241815	0.666666667	0.677242752
Com_741_pos	isoleucine	2.11	C6H13NO2	131.17	Amino Acid And Its Derivatives	"73-32-5"	629900000	585200000	664600000	4912000	99140000	749000000	2.203499904	1.139796834	0.275609198	0.666666667	0.98840277
Com_742_pos	Creatinine	0.898	C4H7N3O	113.12	Organic Acid And Its Derivatives	"60-27-5"	95590	72300	63280	32140	140500	41410	1.079981313	0.111006349	0.602192514	0.666666667	0.461746524
Com_743_pos	L-Citrulline	0.89	C6H13N3O3	175.19	Amino Acid And Its Derivatives	"372-75-8"	13200000	12650000	12760000	221700	71570	1321000	23.91793194	4.580020748	0.045434531	1	1.467774185
Com_744_pos	L-Leucine	2.32	C6H13NO2	131.17	Amino Acid And Its Derivatives	"61-90-5"	688000000	565500000	657600000	3845000	275500000	593600000	2.18925591	1.130440606	0.329585198	0.888888889	0.896714726
Com_745_pos	Urocanic acid	1.04	C6H6N2O2	138.12	Organic Acid And Its Derivatives	"104-98-3"	78150	109400	140800	1069000	439700	9728000	0.029221213	-5.096840141	0.091693932	1	1.346150752
Com_746_pos	Androsterone	11.859	C19H30O2	290.44	Hormones	"53-41-8"	82212	89008	76611	31200	140632	1215000	0.178702972	-2.484364467	0.553194346	0.666666667	0.661229036
Com_747_pos	D-Glutamine	0.86	C5H10N2O3	146.14	Amino Acid And Its Derivatives	"5959-95-5"	684800000	604100000	682600000	3405000	2993000	126400000	14.84585611	3.891988386	0.078919911	1	1.379869383
Com_748_pos	L-Ornithine	0.762	C5H12N2O2	132.16	Amino Acid And Its Derivatives	"70-26-8"	336700000	305100000	338000000	5121000	616100	7013000	76.84645611	6.263906824	0.024650149	1	1.52880789
Com_749_pos	LysoPE 18:2	12.08	C23H44NO7P	477.6	Phospholipid		2596000	893600	4421000	7072	12720	135300000	0.058458559	-4.096441931	0.555938919	0.666666667	0.610638563
Com_74_neg	Acetyl phosphate	0.9	C2H5O5P	140.032	Organic Acid And Its Derivatives	"590-54-5"	1353000	966300	1331000	10900	414000	126400	6.621258843	2.72710553	0.12838927	1	1.252139715
Com_750_pos	MAG (18:3)	11.93	C21H36O4	352.3	Glycerolipids		3826	3756	147172	27738	1888	6728000	0.022900646	-5.448467902	0.572777469	0.555555556	0.554608965
Com_751_pos	LysoPC 10:0	6.25	C18H38NO7P	411.3	Phospholipid		261200	143400	327400	72060	419848	74640000	0.009742865	-6.681438282	0.492409056	0.666666667	0.725577939
Com_752_pos	Octadeca-11E,13E,15Z-trienoic acid	13.5	C18H30O2	278.2	Fatty Acyls	"25575-00-2"	3034000	2965000	3748000	4213000	4094000	26030000	0.283862888	-1.816733848	0.293120355	1	0.979248452
Com_753_pos	2-Hydroxy-6-Aminopurine	2.76	C5H5N5O	151.126	Nucleotide And Its Derivates	"3373-53-3"	148000000	145000000	132700000	110600	746700	71300000	5.899610989	2.560619829	0.150806392	1	1.218117299
Com_754_pos	N-Acetyl-Dl-glutamic acid	1.84	C7H11NO5	189.166	Amino Acid And Its Derivatives	"5817-08-3"	6595000	5352000	6888000	1171000	2262900	84260000	0.214781188	-2.219060459	0.984916753	0.666666667	0.368088632
Com_755_pos	N6-Succinyl Adenosine	4.54	C14H17N5O8	383.313	Nucleotide And Its Derivates	"4542-23-8"	70760000	66690000	70000000	657900	18370	66870000	3.071228063	1.618815648	0.211238505	0.888888889	1.08420674
Com_756_pos	N-Acetyl-L-histidine	1	C8H11N3O3	197.191	Amino Acid And Its Derivatives	"2497-02-1"	35740000	25330000	36400000	51870	138100	22830000	4.23414974	2.082072291	0.163179868	1	1.189868045
Com_757_pos	N-Acetyl-D-tryptophan	11.57	C13H14N2O3	246.262	Amino Acid And Its Derivatives	"2280-01-5"	76140	51850	123900	70664	76916	114800	0.960019819	-0.058863906	0.798574717	0.555555556	0.325892295
Com_758_pos	2-Phenylglycine	2.78	C8H9NO2	151.163	Amino Acid And Its Derivatives	"2835-06-5"	143600000	145300000	130700000	111700	732800	69400000	5.973421407	2.578557503	0.149757588	1	1.220261056
Com_759_pos	N-Acetyl-L-leucine	1.04	C8H15NO3	173.21	Amino Acid And Its Derivatives	"1188-21-2"	4617000	3002000	4514000	122700	279200	6306000	1.808762802	0.855003228	0.255009972	0.666666667	1.01707023
Com_75_neg	9,10-Dihome	11.33	C18H34O4	314.46	Eicosanoid	"53734-70-6"	73540	44560	99130	886800	6296	14540000	0.014075594	-6.15066034	0.502153002	0.666666667	0.630677022
Com_760_pos	O-Acetyl-L-homoserine	1	C6H11NO4	161.16	Amino Acid And Its Derivatives		8614000	6767000	8637000	97721	2670000	6641000	2.55273804	1.352045497	0.277918343	1	0.979357415
Com_761_pos	NG,NG-Dimethyl-L-arginine	0.93	C8H20Cl2N4O2	202.254	Amino Acid And Its Derivatives	"220805-22-1"	24410000	13920000	26620000	8462486	591700	40350000	1.314665927	0.39469624	0.412415969	0.666666667	0.734578452
Com_762_pos	Cytarabine	1	C9H13N3O5	243.22	Nucleotide And Its Derivates	"147-94-4"	9703000	17040000	6591000	163400	1408000	19420000	1.58798365	0.667196059	0.314846981	0.666666667	0.911389725
Com_763_pos	Cuminaldehyde	4.06	C10H12O	148.2	Prenol lipids	"122-03-2"	3291000	2173000	3161000	2148618	701800	1896000	1.817159803	0.861685298	0.181754464	1	1.082523079
Com_764_pos	Cytidine-5-Triphosphate	1.79	C9H16N3O14P3	483.16	Nucleotide And Its Derivates	"36051-68-0"	362600	180000	358700	122187	223844	6312	2.558018749	1.355026838	0.273859492	0.888888889	0.987348833
Com_765_pos	2-Deoxy-D-galactose	0.69	C6H12O5	164.156	Carbohydrates And Its Derivatives	"1949-89-9"	1679000	1251000	1829000	180600	435200	3004000	1.31471352	0.394748466	0.379199343	0.666666667	0.83098356
Com_766_pos	dAMP	1.47	C10H14N5O6P	331.222	Nucleotide And Its Derivates	"653-63-4"	1569000	610800	1725000	110108	286374	889855	3.035596426	1.601980001	0.140037489	0.888888889	1.14347315
Com_767_pos	2-Methylbutyroylcarnitine	5.45	C12H23NO4	245.315	Fatty Acyls	"31023-25-3"	18370000	10170000	19160000	80109	992706	2704000	12.6296893	3.658747243	0.085345804	1	1.346011867
Com_768_pos	L-2-Aminoadipic acid	0.91	C6H11NO4	161.156	Organic Acid And Its Derivatives	"542-32-5"	97570000	79520000	95630000	1066637	548000	25030000	10.23545564	3.355503421	0.091601461	1	1.346367163
Com_769_pos	22(S)-Hydroxycholesterol	0.98	C27H46O2	402.653	Bile Acids	"22348-64-7"	29270	38770	25670	26356	7118	24580	1.614186792	0.690807535	0.282829975	0.888888889	0.917170394
Com_76_neg	9(S)-HPODE	10.83	C18H32O4	312.444	Fatty Acyls	"29774-12-7"	77580	54260	112600	1327000	6474	13470000	0.01651234	-5.920311583	0.503242917	0.666666667	0.623382583
Com_770_pos	2-Aminooctanoic acid	1.03	C8H17NO2	159.226	Organic Acid And Its Derivatives	"2187-07-7"	523500	304400	457000	8320	147500	17560000	0.072528396	-3.785310256	0.87265922	0.666666667	0.403215983
Com_771_pos	Hypotaurine	0.94	C2H7NO2S	109.147	Organic Acid And Its Derivatives	"300-84-5"	60310	73180	48530	67303	37874	45140	1.210907615	0.276088801	0.380694484	0.777777778	0.756499258
Com_772_pos	2,6-Dimethylaniline	4.07	C8H11N	121.18	Benzene and substituted derivatives	"87-62-7"	666000	459500	665000	198934	148100	400100	2.396491125	1.260923597	0.06785338	1	1.3336641
Com_773_pos	2-(Formylamino)Benzoic Acid	4.07	C8H7NO3	164.138	Benzoic Acid And Its Derivatives	"3342-77-6"	232000000	161900000	227500000	744100	53850000	143200000	3.141650838	1.651522849	0.270272124	1	0.990660741
Com_774_pos	L-Cysteine-glutathione gisulfide	0.96	C13H22N4O8S2	426.466	Amino Acid And Its Derivatives	"13081-14-6"	38540000	12840000	32950000	4917	15980	1393000	59.6436657	5.898297023	0.062497326	1	1.404234256
Com_775_pos	L-Cystathionine	0.84	C7H14N2O4S	222.262	Amino Acid And Its Derivatives	"56-88-2"	53290000	61960000	49970000	122500	18060	73020	773.5743047	9.595396064	0.006253404	1	1.586098044
Com_776_pos	L-Methionine Methyl Ester	0.95	C6H14ClNO2S	199.699	Amino Acid And Its Derivatives	"2491-18-1"	678800	595900	598200	528720	210000	127600	2.161903223	1.112301943	0.149708822	1	1.241264649
Com_777_pos	Methionine sulfoxide	0.92	C5H11NO4S	181.21	Amino Acid And Its Derivatives	"62697-73-8"	2600000	1960000	2793000	167000	353200	11310000	0.62154486	-0.686069574	0.514675931	0.666666667	0.663313417
Com_778_pos	L-Saccharopine	1.03	C11H20N2O6	276.286	Amino Acid And Its Derivatives	"997-68-2"	54390000	67610000	58940000	65860	322900	3749000	43.72897413	5.450517599	0.051874164	1	1.450473097
Com_779_pos	L-Methionine sulfone	1.84	C5H11NO4S	181.21	Amino Acid And Its Derivatives	"7314-32-1"	361300000	295100000	346300000	1883000	130600000	514200000	1.550527847	0.632759437	0.378922439	0.666666667	0.829028495
Com_77_neg	ADP-ribose	1.05	C15H23N5O14P2	591.315	Nucleotide And Its Derivates	"20762-30-5"	964400	406900	1188000	304928	264496	58300	4.077110322	2.027546995	0.082222282	1	1.268515758
Com_780_pos	L-Tyrosine	1.84	C9H11NO3	181.189	Amino Acid And Its Derivatives	"60-18-4"	373800000	306200000	360300000	1956000	137500000	533200000	1.546555743	0.629058834	0.380146379	0.666666667	0.827229816
Com_781_pos	L-Canavanine	2.96	C5H12N4O3	176.174	Amino Acid And Its Derivatives	"543-38-4"	6960308	5170962	7550170	24490	4030	193300000	0.101803086	-3.296146796	0.439776632	0.666666667	0.734420133
Com_782_pos	L-Alanyl-L-Lysine	2.57	C9H19N3O3	217.265	Amino Acid And Its Derivatives	"5051-06-9"	164000	127700	190700	161180	33800	24500	2.197922362	1.136140426	0.186885307	0.888888889	1.148292808
Com_783_pos	18-Hydroxycorticosterone	13.52	C21H30O5	362.5	Steroids and steroid derivatives	"561-65-9"	163700	169532	145300	336168	130900	2647000	0.153667807	-2.70211314	0.333882349	0.666666667	0.901017734
Com_784_pos	Indolin-2-one	5.65	C8H7NO	133.15	Indole And Its Derivatives	"59-48-3"	6184	11862	5124	20510	19000	33281	0.318308582	-1.65150204	0.023336063	1	1.428652042
Com_785_pos	Oleamide	15.08	C18H35NO	281.5	Fatty Acyls	"301-02-0"	243200000	66640000	257000000	4114000	6117000	195400000	2.756588258	1.462883793	0.200650177	0.888888889	1.069004048
Com_786_pos	3-(2-Hydroxyphenyl)propionic acid	4.06	C9H10O3	166.17	Phenylpropanoids and polyketides	"495-78-3"	2394000	1729000	2336000	2420135	681400	2264000	1.203794216	0.26758879	0.525344363	0.555555556	0.561138439
Com_787_pos	Indole-3-acetamide	0.81	C10H10N2O	174.2	Indole And Its Derivatives	"879-37-8"	67960000	64640000	67010000	67380	362200	1701000	93.68810371	6.549793964	0.030001341	1	1.512718375
Com_788_pos	Stachydrine	0.97	C7H13NO2	143.18	Amino Acid And Its Derivatives	"471-87-4"	12719004	7696400	12208411	97600	2759000	60240000	0.51704553	-0.951636767	0.520964731	0.666666667	0.662489204
Com_789_pos	2-Pyrrolidinone	2.04	C4H7NO	85.1	Organoheterocyclic compounds	"616-45-5"	11750000	8735000	11580000	4966000	842500	12370000	1.763896911	0.818766247	0.315907671	0.666666667	0.885275463
Com_78_neg	Ala-trp	5.46	C14H17N3O3	275.303	Amino Acid And Its Derivatives	"16305-75-2"	18380	16970	17800	13340	22600	19630	0.956451323	-0.064236549	0.905457525	0.666666667	0.283292998
Com_790_pos	7,8-dihydro-L-Biopterin	1.85	C9H13N5O3	239.23	Organoheterocyclic compounds	"6779-87-9"	38170	28880	37590	2462	13320	54500	1.488859167	0.574207294	0.362312487	0.666666667	0.856524538
Com_791_pos	alpha-Cadinene	13.52	C15H24	204.35	Prenol lipids	"24406-05-1"	18726	6625	16586	10430	18334	82530	0.376812766	-1.408080251	0.402008751	0.666666667	0.791036135
Com_792_pos	Serotonin hydrochloride	2.99	C10H13ClN2O	212.677	Indole And Its Derivatives	"153-98-0"	6879308	4945534	8105598	49000	274416	201100000	0.098947979	-3.337185944	0.605205617	0.666666667	0.57169945
Com_793_pos	Boldenone	9.83	C19H26O2	286.41	Hormones	"846-48-0"	36525	56257	35032	40870	14010	189800	0.522372078	-0.936850312	0.874016354	0.555555556	0.276781637
Com_794_pos	Acetylcarnitine	1.44	C9H17NO4	203.236	Carnitine	"14992-62-2"	44450000	34350000	53230000	351638	486781	11160000	11.00394977	3.459949554	0.082384525	1	1.365531619
Com_795_pos	Acetylchloline Chloride	0.9	C7H16NO2	146.21	Cholines	"60-31-1"	1195000	875700	1175000	25940	3127000	2713000	0.553312854	-0.853832657	0.750763757	0.666666667	0.410269412
Com_796_pos	Adipamide	0.84	C6H12N2O2	144.172	Hormones	"628-94-4"	822500	505100	784500	84080	434800	2581000	0.681348955	-0.553534226	0.718105744	0.666666667	0.485727188
Com_797_pos	Ala-gly	0.84	C5H10N2O3	146.144	Amino Acid And Its Derivatives	"687-69-4"	230100000	184500000	230600000	262100	176600	11880000	52.37565652	5.710824518	0.053119673	1	1.446061116
Com_798_pos	Adenylocuccinic Acid	3.68	C14H18N5O11P	463.293	Organic Acid And Its Derivatives	"19046-78-7"	10520000	6788000	10910000	689202	2811966	7794740	2.498072753	1.320815494	0.198317378	0.888888889	1.104258207
Com_799_pos	Glutarylcarnitine	2.59	C12H21NO6	275.3	Carnitine	"102636-82-8"	1329000	2727000	1381000	2549314	968475	1520000	1.079243295	0.11002013	0.805585717	0.444444444	0.282380682
Com_79_neg	N-Acetylglucosamine 1-phosphate	0.91	C8H16NO9P	301.1	Carbohydrates And Its Derivatives		15260000	9915000	16550000	788587	16940	150500	43.64416486	5.447716876	0.04955569	1	1.452949022
Com_7_neg	1-Methylhistamine	0.95	C6H13Cl2N3	198.09	Polyamine	"6481-48-7"	14640	8419	14040	15450000	30020000	446200	0.000807972	-10.27340724	0.039478585	1	1.476867087
Com_800_pos	S-adenosyl-L-methioninamine	0.86	C15H22N6O5S	398.437	Amino Acid And Its Derivatives	"91279-78-6"	86540000	49400000	84480000	316700	126200	68610	430.9202166	8.751276974	0.001772208	1	1.591914782
Com_801_pos	5-Methoxyindole-3-Carbaldehyde	11.35	C10H9NO2	175.184	Indole And Its Derivatives	"10601-19-1"	145800	29990	184400	299995	315134	399900	0.354856856	-1.494690913	0.150472512	1	1.20161217
Com_802_pos	O-Anisic Acid	2.81	C8H8O3	152.147	Benzoic Acid And Its Derivatives	"579-75-9"	5063000	4799000	4276000	1852315	1270750	2154000	2.679140772	1.421770388	0.016289217	1	1.525716739
Com_803_pos	Protocatechualdehyde	1.54	C7H6O3	138.12	Phenols And Its Derivatives	"139-85-5"	212500	200600	187800	130600	239800	292600	0.906334842	-0.141883948	0.870588892	0.666666667	0.391351054
Com_804_pos	Spermine	0.73	C10H26N4	202.34	Polyamine	"71-44-3"	10380000	15570000	7356000	196800	610300	281600	30.59244971	4.935103731	0.001822554	1	1.566248884
Com_805_pos	Histamine	0.699	C5H9N3	111.15	Amino Acid And Its Derivatives	"51-45-6"	940000	765200	958300	36260	107900	4114000	0.625504913	-0.676906879	0.47371227	0.666666667	0.71263907
Com_806_pos	Biotin	6.003	C10H16N2O3S	244.31	Vitamins	"58-85-5"	908900	704800	918100	2011000	157200	599400	0.914799827	-0.128472003	0.659921525	0.666666667	0.429574936
Com_807_pos	L-Thyroxine	8.845	C15H11I4NO4	776.87	Hormones	"51-48-9"	4577	10300	4680	25680	21828	5014	0.37235825	-1.425236773	0.242729778	0.888888889	0.969854967
Com_808_pos	Allantoin	0.943	C4H6N4O3	158.12	Organoheterocyclic compounds	"97-59-6"	8141000	8995000	8232000	93860	526100	13730000	1.767809806	0.821963067	0.261606862	0.666666667	1.011919044
Com_809_pos	Mesterolone	11.586	C20H32O2	304.47	Hormones	"1424-00-6"	33816	58898	35351	4708	278783	175400	0.279074987	-1.841275269	0.789420324	0.666666667	0.378566415
Com_80_neg	Adrenochrome	5.84	C9H9NO3	179.17	Organoheterocyclic compounds	"54-06-8"	18190	18580	32020	311200	36870	53220	0.171422164	-2.544374444	0.170692327	1	1.131181815
Com_810_pos	(+,-)-Octopamine HCl	1.034	C8H12ClNO2	189.64	Polyamine	"770-05-8"	267400	367200	212600	29850	312800	742100	0.781009449	-0.356588092	0.740244377	0.555555556	0.441093077
Com_811_pos	Digitoxigenine	6.12	C23H34O4	374.5	Steroids and steroid derivatives	"143-62-4"	293300	332000	181700	143575	348233	717000	0.667599817	-0.582944535	0.674354937	0.666666667	0.508982893
Com_812_pos	Sepiapterin	0.84	C9H11N5O3	237.22	Organoheterocyclic compounds	"17094-01-8"	63840	75970	51110	9712	312775	33680	0.536040678	-0.899585611	0.799452473	0.666666667	0.245574317
Com_813_pos	11-cis-Retinol	12.17	C20H30O	286.5	Prenol lipids	"22737-96-8"	73560	41150	131400	273042	453822	109300	0.294332212	-1.764482652	0.095805064	0.888888889	1.188085846
Com_814_pos	Quinone	7.24	C6H4O2	108.09	Ketones	"106-51-4"	38440	70250	44530	112200	28220	42870	0.835943041	-0.258523451	0.934177618	0.555555556	0.250237856
Com_815_pos	L-Leucyl-L-alanine Hydrate	3	C9H18N2O3	202.25	Amino Acid And Its Derivatives	"7298-84-2"	3843000	2027000	3383000	10511068	17460000	6107000	0.271523609	-1.880850451	0.033042964	1	1.389521298
Com_816_pos	3-Amino-4-methylpentanoic acid	1.862	C6H13NO2	131.17	Organic Acid And Its Derivatives	"5699-54-7"	82500	93930	78600	146700	110000	1699000	0.130403436	-2.93894621	0.281205389	1	0.996747463
Com_817_pos	3-Hydroxyhippuric Acid	11.64	C9H9NO4	195.17	Benzoic Acid And Its Derivatives	"1637-75-8"	8323	10300	6487	11270	9821	13710	0.72153099	-0.470866734	0.119241917	0.888888889	1.150845977
Com_818_pos	H-Tyr(3-I)-OH	4.762	C9H10INO3	307.09	Amino Acid And Its Derivatives	"70-78-0"	81957	88124	75606	20910	277900	1342000	0.149735192	-2.739514762	0.541095965	0.666666667	0.669707774
Com_819_pos	L-Lysine	0.74	C6H14N2O2	146.19	Amino Acid And Its Derivatives	"56-87-1"	833600000	763700000	835900000	3998000	3369000	141100000	16.38882715	4.034640708	0.075249158	1	1.389363757
Com_81_neg	2-C-Methyl-D-erythritol 2,4-cyclodiphosphate	0.89	C5H12O9P2	278.09	Organic oxygen compounds	"143488-44-2"	1770000	1563000	1369000	2765	246200	250100	9.421618426	3.235974904	0.155626481	1	1.201462746
Com_820_pos	8-Aminooctanoic acid	4.608	C8H17NO2	159.23	Amino Acid And Its Derivatives	"1002-57-9"	18240	19730	12280	19560	26746	35270	0.615989997	-0.699021171	0.102932507	0.888888889	1.193301691
Com_821_pos	Cocamidopropyl Betaine	9.91	C19H38N2O3	342.5	Amino Acid And Its Derivatives	"86438-79-1"	125500	220400	205500	164500	2160000	5403000	0.071355548	-3.808830577	0.201708135	0.777777778	1.129600646
Com_822_pos	Thiamine	0.81	C12H17N4OS+	265.35	Vitamins	"70-16-6"	4645000	3345000	4574000	54830	596100	62770000	0.198104947	-2.335663185	0.625545864	0.666666667	0.558645371
Com_823_pos	Vitamin U	0.75	C6H14ClNO2S	199.7	Vitamins	"3493-12-7"	117700	216500	129900	69730	290000	652300	0.458583244	-1.124744454	0.559139203	0.666666667	0.624035807
Com_824_pos	Dithranol	1.23	C14H10O3	226.23	Anthracenes	"1143-38-0"	174400	243900	242900	226100	141100	191600	1.183249821	0.242754704	0.381871464	0.777777778	0.72287976
Com_825_pos	Triclosan	1.06	C12H7Cl3O2	289.54	Others	"3380-34-5"	298200	239100	377900	20120	130900	119200	3.386869958	1.759952594	0.129420666	1	1.235266578
Com_826_pos	Nitroxoline	8.67	C9H6N2O3	190.16	Others	"4008-48-4"	9470	4784	9924	202200	29478	20940	0.095709728	-3.385190625	0.105388079	1	1.262338314
Com_827_pos	Acetylcholine	1.02	C7H16INO2	146.207	Cholines	"51-84-3"	66560000	51160000	69100000	134000	10250000	127600000	1.353925093	0.437147923	0.353392788	0.666666667	0.86894618
Com_828_pos	D-Panthenol	4.65	C9H19NO4	205.25	Fatty Acyls	"81-13-0"	10078700	8844200	9684100	29300000	13070000	15940000	0.490601955	-1.027375112	0.111799165	1	1.283000994
Com_829_pos	Metformin	0.68	C4H11N5	129.165	Others	"657-24-9"	395500	364200	557400	111900	218600	603400	1.410322304	0.496024903	0.368824918	0.666666667	0.831695781
Com_82_neg	Allolithocholic acid	11.18	C24H40O3	376.579	Bile Acids	"2276-93-9"	2043000	1485000	1498000	1117000	1403000	4501000	0.715852443	-0.482265857	0.76986385	0.666666667	0.457345602
Com_830_pos	Dihydrotestosterone	11.29	C19H30O2	290.44	Others	"521-18-6"	3920	2339	3719	8180	34285	54060	0.103372183	-3.274080075	0.060558507	1	1.410782973
Com_831_pos	dGMP	1.04	C10H14N5O7P	347.221	Nucleotide And Its Derivates	"902-04-5"	45610	18510	27390	56868	4987	12760	1.226429002	0.294463719	0.482882177	0.666666667	0.639852884
Com_832_pos	S-Adenosyl-L-homocysteine	1.84	C14H20N6O5S	384.411	Amino Acid And Its Derivatives	"979-92-0"	9704000	5832000	8640000	109893	1681867	6578000	2.888493816	1.530317406	0.237130823	0.888888889	1.046201626
Com_833_pos	thiamine phosphate	0.84	C12H18ClN4O4PS	380.787	Pyrimidines and pyrimidine derivatives	"532-40-1"	871400	984500	871400	333588	428577	93460	3.187494522	1.672422862	0.103436315	1	1.336519207
Com_834_pos	L-arginino-succinate	2.3	C10H18N4O6	290.273	Amino Acid And Its Derivatives		23480000	21060000	22460000	14710	1921701	7419900	7.160941957	2.840149373	0.195046653	1	1.12719322
Com_835_pos	L-Normetanephrine	4.06	C9H13NO3	183.204	Hormones	"97-31-4"	8542000	5677000	8323000	40820	1997000	5015000	3.196168341	1.676343397	0.258796829	1	1.009031198
Com_836_pos	Cystine	0.84	C6H12N2O4S2	240.301	Amino Acid And Its Derivatives	"923-32-0"	293500	394100	325000	86081	18680	102800	4.878565819	2.286457093	0.075580459	1	1.373076704
Com_837_pos	D-Homocysteine	1.86	C4H9NO2S	135.185	Amino Acid And Its Derivatives	"454-28-4"	1819000	1244000	1618000	298460	588200	2734000	1.292858208	0.370564059	0.410330953	0.666666667	0.787922925
Com_838_pos	Dimethyl fumarate	0.9	C6H8O4	144.125	Fatty Acyls	"624-49-7"	6133000	3203000	6748000	671300	5566000	41420000	0.337492892	-1.567070977	0.969668372	0.555555556	0.390158107
Com_839_pos	Adipic Acid	0.84	C6H10O4	146.14	Fatty Acyls	"124-04-9"	31140000	21560000	30620000	56540	232700	30310000	2.722943446	1.445167019	0.19734568	0.888888889	1.12372168
Com_83_neg	L-Erythrulose	1.04	C4H8O4	120.1	Carbohydrates And Its Derivatives	"533-50-6"	161900	155900	169000	282800	808700	114894	0.403516596	-1.309300085	0.394937591	0.666666667	0.770353612
Com_840_pos	Maleic Acid	0.94	C4H4O4	116.07	Organic Acid And Its Derivatives	"110-16-7"	36660000	32360000	34880000	363000	1090000	22110000	4.409455502	2.140600517	0.148398525	1	1.222851519
Com_841_pos	Pipecolinic Acid	0.85	C6H11NO2	129.16	Amino Acid And Its Derivatives	"1723-00-8"	57900000	45390000	59160000	79530	42280	1919000	79.60074676	6.31471006	0.040160289	1	1.480904768
Com_842_pos	N-(3-Indolylacetyl)-L-Alanine	3.97	C13H14N2O3	246.26	Amino Acid And Its Derivatives	"57105-39-2"	696200	446300	790600	336370	374925	2217000	0.660145238	-0.599144629	0.951275198	0.666666667	0.363559849
Com_843_pos	Isonicotinamide	1.51	C6H6N2O	122.12	Pyridine And Its Derivatives	"1453-82-3"	11090000	12250000	11490000	268800	329400	5956000	5.314149706	2.409838871	0.116706973	1	1.290105434
Com_844_pos	2,6-Diaminooimelic Acid	0.94	C7H14N2O4	190.2	Amino Acid And Its Derivatives	"583-93-7"	35510000	18510000	34870000	16940	67490	19740000	4.483861579	2.164741741	0.16521009	0.888888889	1.183314165
Com_845_pos	1,3-Diaminopropane	0.65	C3H10N2	74.13	Amines	"109-76-2"	182900	105800	189400	162260	72486	117200	1.358447034	0.441958316	0.341678373	0.777777778	0.770943075
Com_846_pos	trans-Cinnamic acid	4.07	C9H8O2	148.16	Cinnamic acids and derivatives	"140-10-3"	2679000	1778000	2540000	3166228	565500	1548000	1.325257665	0.406272885	0.431312223	0.666666667	0.70393431
Com_847_pos	Pyrrole-2-carboxylate	1.01	C5H5NO2	111.1	Organoheterocyclic compounds	"634-97-9"	2929000	3085000	2179000	40700	437100	2332000	2.915865898	1.543924371	0.221593492	0.888888889	1.076561788
Com_848_pos	Oxypurinol	1.68	C5H4N4O2	152.11	Nucleotide And Its Derivates	"2465-59-0"	3634000	2822000	4000000	372300	447800	9810000	0.983621979	-0.023824122	0.418091447	0.666666667	0.773367916
Com_849_pos	PAF C-16	13.8	C26H54NO7P	523.683	Phospholipid	"74389-68-7"	942600	159600	1988000	11920	32720	184200000	0.016772265	-5.897778626	0.892591357	0.666666667	0.375317662
Com_84_neg	D-Mannose 6-phosphate	0.87	C6H13O9P	260.14	Carbohydrates And Its Derivatives	"3672-15-9"	94470000	78420000	93120000	59190	1883000	1492000	77.45931355	6.275366811	0.044715338	1	1.468957301
Com_850_pos	7-Methyluric acid	11.32	C6H6N4O3	182.137	Organic Acid And Its Derivatives	"612-37-3"	645400	669600	681800	715000	604400	461000	1.12154572	0.165488433	0.415093601	0.666666667	0.819403555
Com_851_pos	N7-Methylguanosine	4.15	C11H17N5O5	298.28	Nucleotide And Its Derivates	"20244-86-4"	3724000	4188000	3141000	8874	214900	3883000	2.691406929	1.428360537	0.236719806	0.777777778	1.053425012
Com_852_pos	7-Methylguanine	4.09	C6H7N5O	165.153	Nucleotide And Its Derivates	"578-76-7"	509900000	422800000	510900000	2575000	183900000	390000000	2.504184917	1.324341099	0.306051703	1	0.932831942
Com_853_pos	7-Ketocholesterol	16.92	C27H44O2	400.637	Hormones	"566-28-9"	21770	25900	52990	24580	26010	176300	0.443651108	-1.172502522	0.578143354	0.666666667	0.590377191
Com_854_pos	Propionyl-L-carnitine	2.57	C10H19NO4	217.26	Carnitine	"17298-37-2"	2890000	2040000	3480000	3176010	338745	661600	2.013717704	1.009861451	0.229383339	0.777777778	1.044349329
Com_855_pos	Punicic Acid	12.7	C18H30O2	278.43	Fatty Acyls	"544-72-9"	3587000	3065000	3837000	407000	264300	85880000	0.121188243	-3.044678348	0.81108243	0.666666667	0.386090619
Com_856_pos	Pro-Leu	1.72	C11H20N2O3	228.288	Amino Acid And Its Derivatives	"52899-07-7"	7029693	5492290	7226031	37000	625000	233400000	0.084370868	-3.567111254	0.660754774	0.666666667	0.527231627
Com_857_pos	Propionylcholine	1.03	C8H18NO2+	160.234	Cholines	"5072-54-8"	568300	508900	549000	613332	227600	11380000	0.133066774	-2.909777708	0.580403393	0.666666667	0.586923251
Com_858_pos	p-Mentha-1,3,8-triene	11.37	C10H14	134.218	Fatty Acyls	"18368-95-1"	1071000	211700	1359000	92160	52040	3094000	0.815792724	-0.293725454	0.526942733	0.666666667	0.605703124
Com_859_pos	Porphobilinogen	4.9	C10H14N2O4	226.229	Organic nitrogen compounds	"487-90-1"	1147000	978700	1139000	512530	40830	417300	3.363381617	1.749912479	0.176513837	1	1.148733987
Com_85_neg	4-Hydroxy-6-methyl-2-pyrone	0.84	C6H6O3	126.11	Organoheterocyclic compounds	"675-10-5"	79690	98540	104100	122734	12300	240200	0.752410496	-0.410408121	0.792154379	0.666666667	0.255238526
Com_860_pos	4-Aminobenzoate	2.74	C7H7NO2	137.136	Benzoic Acid And Its Derivatives	"150-13-0"	2805000	2263000	2715000	386500	383576	4144000	1.583817588	0.663406187	0.295313431	0.666666667	0.948417623
Com_861_pos	Picolinamide	1.51	C6H6N2O	122.125	Pyridine And Its Derivatives	"1452-77-3"	11750000	12650000	11930000	251300	324100	6171000	5.385094273	2.428971601	0.11764797	1	1.288316426
Com_862_pos	5-Methyl-2'-deoxycytidine	1.722	C10H15N3O4	241.24	Nucleotide And Its Derivates	"838-07-3"	14540	6146	14843	40524	34641	102800	0.199640379	-2.324524549	0.025905432	1	1.410326015
Com_863_pos	Guggulsterone	15.17	C21H28O2	312.446	Hormones	"95975-55-6"	382900	329100	307200	418300	286200	2740000	0.295892002	-1.756857395	0.415155358	0.666666667	0.794987033
Com_864_pos	4-Chloro-6-methoxy-2-(methylsulfinyl)pyrimidine	2.72	C10H13N5O5	283.241	Nucleotide And Its Derivates	"85-30-3"	377100000	395200000	319900000	345900	413500	218000000	4.992699742	2.319820147	0.154358754	1	1.207515716
Com_865_pos	Guanine	2.72	C5H5N5O	151.126	Nucleotide And Its Derivates	"73-40-5"	99610000	95430000	90460000	1110559	512600	47170000	5.851230087	2.54873995	0.131572866	1	1.254418608
Com_866_pos	Imatinib	11.76	C29H31N7O	493.603	Others	"152459-95-5"	18440000	6661000	25220000	17685	60470	433900000	0.115952841	-3.108389927	0.454373986	0.666666667	0.729542175
Com_867_pos	Hydrocortisone 17-butyrate	10.51	C25H36O6	432.55	Others	"13609-67-1"	79210	54770	68800	42352	52477	134725	0.883365134	-0.178918204	0.997947273	0.666666667	0.370976509
Com_868_pos	Homoserine	0.9	C4H9NO3	119.119	Amino Acid And Its Derivatives	"1927-25-9"	51770000	47460000	50230000	1607000	2126000	17100000	7.174194787	2.842816917	0.075689594	1	1.38877369
Com_869_pos	Homocysteic acid	1.83	C4H9NO5S	183.18	Amino Acid And Its Derivatives	"1001-13-4"	3043000	2264000	2922000	62060	927300	4852000	1.408747278	0.494412823	0.37829372	0.666666667	0.833970341
Com_86_neg	Ethyl myristate	15.68	C16H32O2	256.42	Fatty Acyls	"124-06-1"	4235000	6243000	5555000	3496000	5342000	10110000	0.846157906	-0.241001178	0.818421021	0.555555556	0.40485803
Com_870_pos	glutathione disulfide	1.81	C20H32N6O12S2	612.631	Amino Acid And Its Derivatives	"27025-41-8"	142100000	71970000	144700000	872029	10309635	3724000	24.0693739	4.589126709	0.028770132	1	1.478126387
Com_871_pos	Phe-Pro	5.58	C14H18N2O3	262.304	Amino Acid And Its Derivatives	"7669-65-0"	105500	48500	38960	40860	316721	3756000	0.046908035	-4.414021134	0.29422311	0.777777778	0.97573089
Com_872_pos	Phe-Phe	6.51	C18H20N2O3	312.363	Amino Acid And Its Derivatives	"2577-40-4"	519500	487500	464200	51640000	20520000	1159000	0.02006574	-5.639121819	0.114168051	1	1.297342999
Com_873_pos	alpha-Nicotinamide adenine dinucleotide	1.04	C21H27N7O14P2	663.425	Nucleotide And Its Derivates	"7298-93-3"	8266000	3273000	10190000	2736587	4391	694300	6.325252279	2.661123022	0.215562868	1	1.058609105
Com_874_pos	penicillin	1.04	C14H21N3O6S	359.398	Others	"525-94-0"	20120	26950	20310	11503	35350	29030	0.887945917	-0.171456288	0.953784745	0.666666667	0.258564881
Com_875_pos	trans-3-Hydroxy-L-proline	2.14	C5H9NO3	131.13	Amino Acid And Its Derivatives	"4298-08-2"	126300000	93040000	122900000	297100	7517000	127800000	2.523631392	1.335501202	0.245831148	0.666666667	1.038226242
Com_876_pos	4-Acetamidobutanoate	1.03	C6H11NO3	145.156	Organic Acid And Its Derivatives	"3025-96-5"	1721000	755100	1979000	56590	677400	59270000	0.074246729	-3.751528717	0.985733959	0.666666667	0.386309726
Com_877_pos	Val-Ser	1.01	C8H16N2O4	204.224	Amino Acid And Its Derivatives	"13588-94-8"	375400	248900	298500	5171615	719200	36620000	0.021707417	-5.525668104	0.128486803	1	1.266765785
Com_878_pos	L-Alanine	0.86	C3H7NO2	89.09	Amino Acid And Its Derivatives	"56-41-7"	79010000	88620000	75540000	1558000	1112000	21030000	10.26033755	3.35900629	0.074766154	1	1.388964889
Com_879_pos	L-Aspartic acid	0.86	C4H7NO4	133.1	Amino Acid And Its Derivatives	"56-84-8"	3793000	4906000	4052000	3202000	12730000	30710000	0.273380215	-1.871019257	0.289911529	0.666666667	0.990824785
Com_87_neg	m-Coumaric acid	1.83	C9H8O3	164.16	Cinnamic acids and derivatives	"588-30-7"	159000	136900	131200	157062	87470	391000	0.672035397	-0.573390871	0.677700655	0.555555556	0.460648295
Com_880_pos	beta-Nicotinamide mononucleotide	0.993	C11H15N2O8P	334.219	Nucleotide And Its Derivates	"1094-61-7"	116500000	96080000	112600000	386992	10050	795800	272.6094487	8.090691757	0.039236134	1	1.485442841
Com_881_pos	Creatine	0.94	C4H9N3O2	131.133	Organic Acid And Its Derivatives	"57-00-1"	186800	147200	857100	1478000	251600	2784000	0.263891351	-1.92198403	0.241180281	0.888888889	0.928253757
Com_882_pos	Choline Glycerophosphate	0.89	C8H20NO6P	257.22	Cholines	"28319-77-9"	224900000	209000000	237100000	284600	330000	328900000	2.036328588	1.025970377	0.208173897	0.666666667	1.101518609
Com_883_pos	DL-Citrulline	0.9	C6H13N3O3	175.19	Amino Acid And Its Derivatives	"627-77-0"	46660000	41370000	45100000	873800	398300	4259000	24.06935329	4.589125474	0.034090691	1	1.49922454
Com_884_pos	4-Aminobutyric acid	0.864	C4H9NO2	103.12	Organic Acid And Its Derivatives	"56-12-2"	130700000	127200000	126400000	345300	250800	35400000	10.67615658	3.416320465	0.107337392	1	1.311190933
Com_885_pos	Glycine	0.88	C2H5NO2	75.07	Amino Acid And Its Derivatives	"56-40-6 "	572000	790300	581200	296800	50590	163300	3.805635513	1.928137393	0.0901194	1	1.33363511
Com_886_pos	L-Arginine	0.794	C6H14N4O2	174.2	Amino Acid And Its Derivatives	"74-79-3"	382500000	389300000	382200000	1358000	2748000	38780000	26.90854824	4.749992652	0.052082073	1	1.451129661
Com_887_pos	L-Cysteine	0.88	C3H7NO2S	121.16	Amino Acid And Its Derivatives	"52-90-4"	291400	231500	277400	18660	12750	79930	7.187892941	2.845568921	0.052454336	1	1.441383835
Com_888_pos	LysoPC 12:1	1.5	C20H36NO7P	439.1	Phospholipid		18570	11060	12660	18790	10200	10870	1.060963372	0.08537485	0.781629601	0.666666667	0.317148061
Com_889_pos	Nicotinate ribonucleoside	1.04	C11H13NO6	255.224	Carbohydrates And Its Derivatives	"17720-18-2"	1065000	984100	1163000	265300	29390	6478000	0.474272409	-1.076212154	0.568015076	0.666666667	0.55454962
Com_88_neg	Isocitrate	1.46	C6H8O7	192.12	Organic Acid And Its Derivatives	"320-77-4"	276000000	256000000	310600000	92940000	117500000	427400000	1.321020946	0.401653342	0.39035783	0.666666667	0.812411989
Com_890_pos	S-Methyl-L-cysteine	1.04	C4H9NO2S	135.185	Amino Acid And Its Derivatives	"1187-84-4"	3184000	4884000	2681000	129300	1421000	7284000	1.216734772	0.283014719	0.431254781	0.666666667	0.755811626
Com_891_pos	MAG (18:2)	14.64	C21H38O4	354.1	Glycerolipids		10250	3816	13570	164488	380106	1203000	0.015813742	-5.982677431	0.007022759	1	1.527685955
Com_892_pos	Tetraethylammonium fluoride dihydrate	1.04	C8H20FN	149.25	Nucleotide And Its Derivates	"63123-01-3"	6589000	11660000	5100000	430616	757000	15730000	1.380159001	0.464834482	0.324101763	0.666666667	0.89072093
Com_893_pos	Cholesterol	11.2	C27H46O	386.654	Hormones	"57-88-5"	1629000	1566000	1518000	1796000	2381000	8117000	0.383357735	-1.383236804	0.254967226	1	1.052503498
Com_894_pos	5'-Deoxy-5'-(methylthio)adenosine	4.91	C11H15N5O3S	297.333	Nucleotide And Its Derivates	"2457-80-9"	37950000	30420000	31250000	135900	2095998	35210000	2.660655718	1.411781841	0.230829989	0.777777778	1.064806976
Com_895_pos	L-Homocarnosine	6.28	C10H16N4O3	240.259	Amino Acid And Its Derivatives	"3650-73-5"	90281	98608	20230	163440	367274	1814000	0.089187423	-3.487015906	0.077085075	1	1.267430902
Com_896_pos	L-Valine	1.2	C5H11NO2	117.146	Amino Acid And Its Derivatives	"72-18-4"	59630000	43790000	56350000	93780	1825000	37660000	4.036759092	2.013197491	0.192620447	1	1.1343608
Com_897_pos	Hypoxanthine-9-beta-D-Arabinofuranoside	2.58	C10H12N4O5	268.226	Nucleotide And Its Derivates	"7013-16-3"	285300000	253800000	263800000	462900	75210	277100000	2.891894056	1.5320147	0.191798395	0.777777778	1.127737653
Com_898_pos	4-aminobutyrate	0.84	C4H9NO2	103.12	Organic Acid And Its Derivatives		55590000	54770000	54000000	90460	19800	12100000	13.46081083	3.75069341	0.11218783	1	1.298015074
Com_899_pos	4-Aminoindole	8.42	C8H8N2	132.163	Indole And Its Derivatives	"5192-23-4"	88857	87277	77192	577500	31755	310900	0.275307964	-1.860881748	0.484137173	0.666666667	0.628110479
Com_89_neg	3-Oxo-7alpha,12alpha-hydroxy-5beta-cholanoic acid	10.321	C24H38O5	406.562	Bile Acids	"2304-89-4"	71220	37100	81680	78130	1432000	317700	0.103948398	-3.266060573	0.172535691	0.888888889	1.134272768
Com_8_neg	1-Caffeoylquinic Acid	18.71	C16H18O9	354.309	Organic Acid And Its Derivatives	"1241-87-8"	163000	107500	64940	116500	119000	84080	1.049627636	0.069877611	0.979760492	0.555555556	0.129285024
Com_900_pos	3-Methylhistidine	0.76	C7H13N3O3	169.181	Amino Acid And Its Derivatives	"368-16-1"	214700	171200	176900	148802	371457	817000	0.42086088	-1.24858468	0.319000117	0.666666667	0.94988271
Com_901_pos	3-OH-anthranilate	1.68	C7H7NO3	153.14	Organic Acid And Its Derivatives		219100	200000	255000	157900	2852000	525000	0.190698464	-2.390634872	0.349112083	0.666666667	0.845413007
Com_902_pos	3-Nitro-L-Tyrosine	8.98	C9H10N2O5	226.186	Amino Acid And Its Derivatives	"621-44-3"	164400	164000	165500	570900	399200	265600	0.399692482	-1.323037658	0.058994171	1	1.432967193
Com_903_pos	3-amino isobutanoate	0.91	C4H9NO2	103.12	Amino Acid And Its Derivatives		31980	26090	32850	299100	5222000	562900	0.014944116	-6.064278659	0.056568565	1	1.437260652
Com_904_pos	3-Guanidinopropanoate	0.9	C4H9N3O2	131.133	Organic nitrogen compounds	"353-09-3"	103300	46900	80010	54980	19740	1653000	0.13324497	-2.90784702	0.741227675	0.555555556	0.43468073
Com_905_pos	3'-Adenylic acid	5.13	C10H14N5O7P	347.221	Nucleotide And Its Derivates	"84-21-9"	5106000	43950	6796000	2277222	70251	103300	4.874360049	2.285212821	0.492368907	0.666666667	0.589721983
Com_90_neg	Ursodeoxycholic acid	10.538	C24H40O4	392.57	Bile Acids	"128-13-2"	91028	59796	76186	24710	21540	518000	0.402321666	-1.313578662	0.908037442	0.666666667	0.352475095
Com_91_neg	gamma-Muricholate	9.997	C24H40O5	408.57	Bile Acids	"547-75-1"	62210	70820	46760	3320000	3303000	23190000	0.006030591	-7.373484967	0.016054044	1	1.554364614
Com_92_neg	Glycodeoxycholic acid	10.677	C26H43NO5	449.628	Bile Acids	"360-65-6"	137400	131200	160900	264900	147300	1902000	0.185593294	-2.429783515	0.296972253	0.888888889	0.964899492
Com_93_neg	N alpha-Acetyl-L-Arginine	1.03	C8H16N4O3	216.238	Amino Acid And Its Derivatives	"155-84-0"	201900	235400	241900	13700	436233	199200	1.046318705	0.065322359	0.545693607	0.666666667	0.584503851
Com_94_neg	Orotic Acid	1.15	C5H4N2O4	156.096	Pyrimidines and pyrimidine derivatives	"65-86-1"	8645000	9604000	8456000	1871000	1695000	7062000	2.512702296	1.329239751	0.128941581	1	1.257414549
Com_95_neg	L-Fucose	0.98	C6H12O5	164.156	Carbohydrates And Its Derivatives	"2438-80-4"	184300	347600	335100	98500	226300	92970	2.075304593	1.053323097	0.099170486	0.888888889	1.193637688
Com_96_neg	Leu-Pro	1.3	C11H21ClN2O3	264.749	Amino Acid And Its Derivatives	"87178-63-0"	386000	290500	324700	3990000	479300	7644000	0.082652952	-3.596789848	0.138044996	1	1.236751791
Com_97_neg	Prostaglandin B2	0.7	C20H30O4	334.45	Hormones	"13367-85-6"	116600	78880	121100	46080	106800	100600	1.248934827	0.320698195	0.439538694	0.777777778	0.693630195
Com_98_neg	Uridine 5'-Diphospho-N-Acetylgalactosamine	1	C17H27N3O17P2	607.354	Nucleotide And Its Derivates	"7277-98-7"	19930000	20930000	24550000	2950798	936538	686300	14.30153165	3.838097758	0.021370251	1	1.543320687
Com_99_neg	D-Glucuronic acid	0.894	C6H10O7	194.14	Sugar Acids And Its Derivatives	"6556-12-3"	119556	140400	206995	68740	191015	939200	0.389464992	-1.360434439	0.637663009	0.555555556	0.571598213
Com_9_neg	13-Hpotre(R)	11.93	C18H30O4	310.428	Eicosanoid	"121107-97-9"	25310	18610	20780	17550	180949	1795000	0.032455497	-4.945393359	0.252718544	0.666666667	1.059294096
