# Supplementary material for: Transcriptome and Quasi-Targeted Metabolome Analyze Overexpression of 4-Hydroxyphenylpyruvate Dioxygenase Alleviates Fungal Toxicity of 9-Phenanthrol in Magnaporthe oryzae
Source: Int J Mol Sci. 2022 Jun 27;23(13):7116. doi: 10.3390/ijms23137116 (PMC9266922; doi:10.3390/ijms23137116)
Supplement: Supplementary file 1 [file ijms-23-07116-s001.zip › Table S8.xlsx]

## Sheet: Sheet1
Table S8. The predicted interaction of DEGs by String.
Source	Target
MGG_00039	MGG_01230
MGG_00039	MGG_13895
MGG_00039	MGG_07884
MGG_00039	MGG_01662
MGG_00039	MGG_01606
MGG_00040	MGG_05098
MGG_00072	MGG_09376
MGG_00072	MGG_01941
MGG_00087	MGG_04201
MGG_00087	MGG_00985
MGG_00087	MGG_04995
MGG_00087	MGG_01572
MGG_00087	MGG_00771
MGG_00087	MGG_11360
MGG_00087	MGG_01224
MGG_00087	MGG_03270
MGG_00087	MGG_04565
MGG_00087	MGG_06381
MGG_00087	MGG_04802
MGG_00087	MGG_07728
MGG_00087	MGG_02460
MGG_00087	MGG_08178
MGG_00087	MGG_09313
MGG_00087	MGG_04470
MGG_00087	MGG_06242
MGG_00087	MGG_06429
MGG_00087	MGG_04179
MGG_00087	MGG_13803
MGG_00087	MGG_08867
MGG_00087	MGG_12370
MGG_00087	MGG_05963
MGG_00087	MGG_01292
MGG_00087	MGG_04993
MGG_00087	MGG_01183
MGG_00087	MGG_08840
MGG_00194	MGG_01624
MGG_00220	MGG_03824
MGG_00220	MGG_01300
MGG_00220	MGG_01147
MGG_00220	MGG_08985
MGG_00220	MGG_05008
MGG_00220	MGG_03900
MGG_00220	MGG_00246
MGG_00220	MGG_06784
MGG_00220	MGG_02921
MGG_00246	MGG_03824
MGG_00246	MGG_08985
MGG_00246	MGG_01147
MGG_00246	MGG_05008
MGG_00246	MGG_03900
MGG_00246	MGG_06784
MGG_00246	MGG_02921
MGG_00249	MGG_06062
MGG_00273	MGG_07250
MGG_00311	MGG_07724
MGG_00312	MGG_04059
MGG_00312	MGG_05317
MGG_00317	MGG_03824
MGG_00317	MGG_06011
MGG_00317	MGG_06691
MGG_00317	MGG_00431
MGG_00402	MGG_10613
MGG_00431	MGG_03840
MGG_00431	MGG_03764
MGG_00431	MGG_08293
MGG_00431	MGG_06691
MGG_00459	MGG_05900
MGG_00459	MGG_07973
MGG_00459	MGG_17376
MGG_00459	MGG_06862
MGG_00459	MGG_05159
MGG_00459	MGG_03158
MGG_00459	MGG_00963
MGG_00459	MGG_04161
MGG_00459	MGG_04131
MGG_00459	MGG_06926
MGG_00537	MGG_06062
MGG_00537	MGG_08548
MGG_00537	MGG_09063
MGG_00537	MGG_08074
MGG_00537	MGG_07187
MGG_00537	MGG_04826
MGG_00703	MGG_03593
MGG_00771	MGG_08760
MGG_00771	MGG_07968
MGG_00771	MGG_02103
MGG_00771	MGG_03847
MGG_00771	MGG_07187
MGG_00771	MGG_08074
MGG_00771	MGG_09541
MGG_00779	MGG_13656
MGG_00779	MGG_09061
MGG_00779	MGG_09189
MGG_00792	MGG_10860
MGG_00792	MGG_07594
MGG_00792	MGG_01067
MGG_00792	MGG_06580
MGG_00792	MGG_06446
MGG_00792	MGG_09014
MGG_00792	MGG_13538
MGG_00792	MGG_04628
MGG_00792	MGG_06139
MGG_00811	MGG_04059
MGG_00811	MGG_04070
MGG_00824	MGG_10583
MGG_00832	MGG_07219
MGG_00832	MGG_09602
MGG_00832	MGG_02756
MGG_00832	MGG_07216
MGG_00832	MGG_02252
MGG_00832	MGG_05059
MGG_00832	MGG_07215
MGG_00833	MGG_01662
MGG_00833	MGG_11486
MGG_00940	MGG_09351
MGG_00942	MGG_07628
MGG_00942	MGG_07268
MGG_00942	MGG_01553
MGG_00942	MGG_05223
MGG_00942	MGG_01104
MGG_00942	MGG_06950
MGG_00942	MGG_07224
MGG_00942	MGG_03583
MGG_00942	MGG_09292
MGG_00942	MGG_03840
MGG_00956	MGG_01300
MGG_00956	MGG_07935
MGG_00956	MGG_08206
MGG_00963	MGG_03166
MGG_00963	MGG_07973
MGG_00963	MGG_01778
MGG_00963	MGG_17376
MGG_00963	MGG_04161
MGG_00963	MGG_03158
MGG_00963	MGG_05159
MGG_00963	MGG_06926
MGG_00963	MGG_06862
MGG_00980	MGG_07628
MGG_00980	MGG_01553
MGG_00980	MGG_03840
MGG_00985	MGG_04995
MGG_00985	MGG_06429
MGG_00985	MGG_01572
MGG_00985	MGG_06381
MGG_00985	MGG_04470
MGG_00985	MGG_08178
MGG_00985	MGG_06242
MGG_00985	MGG_13803
MGG_00985	MGG_04179
MGG_00985	MGG_02460
MGG_00985	MGG_08867
MGG_00985	MGG_08840
MGG_00985	MGG_04993
MGG_00985	MGG_04802
MGG_00985	MGG_09313
MGG_00985	MGG_12370
MGG_00985	MGG_01292
MGG_00985	MGG_01183
MGG_01067	MGG_01096
MGG_01067	MGG_12601
MGG_01067	MGG_10709
MGG_01067	MGG_03143
MGG_01067	MGG_03126
MGG_01067	MGG_06691
MGG_01067	MGG_07474
MGG_01104	MGG_01553
MGG_01104	MGG_09919
MGG_01104	MGG_07187
MGG_01104	MGG_06547
MGG_01104	MGG_07628
MGG_01104	MGG_12601
MGG_01104	MGG_06950
MGG_01104	MGG_05223
MGG_01104	MGG_07224
MGG_01147	MGG_06784
MGG_01183	MGG_02881
MGG_01183	MGG_03856
MGG_01183	MGG_07545
MGG_01183	MGG_07737
MGG_01183	MGG_04565
MGG_01183	MGG_11360
MGG_01183	MGG_04201
MGG_01183	MGG_01224
MGG_01183	MGG_05963
MGG_01183	MGG_03270
MGG_01183	MGG_07728
MGG_01183	MGG_01572
MGG_01183	MGG_04470
MGG_01183	MGG_04995
MGG_01183	MGG_06242
MGG_01183	MGG_08178
MGG_01183	MGG_04802
MGG_01183	MGG_13803
MGG_01183	MGG_04993
MGG_01183	MGG_06429
MGG_01183	MGG_06381
MGG_01183	MGG_04179
MGG_01183	MGG_08840
MGG_01183	MGG_01292
MGG_01183	MGG_08867
MGG_01183	MGG_12370
MGG_01183	MGG_09313
MGG_01183	MGG_02460
MGG_01224	MGG_07250
MGG_01224	MGG_05963
MGG_01224	MGG_06242
MGG_01224	MGG_12370
MGG_01224	MGG_06429
MGG_01224	MGG_06381
MGG_01224	MGG_04179
MGG_01224	MGG_04802
MGG_01224	MGG_08840
MGG_01224	MGG_04993
MGG_01224	MGG_13803
MGG_01224	MGG_01572
MGG_01224	MGG_07728
MGG_01224	MGG_09313
MGG_01224	MGG_01292
MGG_01224	MGG_08867
MGG_01224	MGG_02460
MGG_01224	MGG_08178
MGG_01224	MGG_04470
MGG_01224	MGG_11360
MGG_01224	MGG_03270
MGG_01224	MGG_07737
MGG_01224	MGG_04995
MGG_01224	MGG_04201
MGG_01230	MGG_03494
MGG_01230	MGG_04590
MGG_01230	MGG_02531
MGG_01230	MGG_03824
MGG_01230	MGG_06011
MGG_01230	MGG_07268
MGG_01230	MGG_01662
MGG_01292	MGG_02881
MGG_01292	MGG_05963
MGG_01292	MGG_04565
MGG_01292	MGG_07545
MGG_01292	MGG_07737
MGG_01292	MGG_04201
MGG_01292	MGG_11360
MGG_01292	MGG_04995
MGG_01292	MGG_07728
MGG_01292	MGG_03270
MGG_01292	MGG_01572
MGG_01292	MGG_06429
MGG_01292	MGG_06381
MGG_01292	MGG_06242
MGG_01292	MGG_08178
MGG_01292	MGG_04993
MGG_01292	MGG_04470
MGG_01292	MGG_04802
MGG_01292	MGG_02460
MGG_01292	MGG_13803
MGG_01292	MGG_08867
MGG_01292	MGG_12370
MGG_01292	MGG_04179
MGG_01292	MGG_09313
MGG_01292	MGG_08840
MGG_01300	MGG_08615
MGG_01300	MGG_05159
MGG_01300	MGG_07933
MGG_01300	MGG_08206
MGG_01404	MGG_03648
MGG_01553	MGG_04895
MGG_01553	MGG_02611
MGG_01553	MGG_06547
MGG_01553	MGG_07268
MGG_01553	MGG_12601
MGG_01553	MGG_05223
MGG_01572	MGG_11716
MGG_01572	MGG_08163
MGG_01572	MGG_04201
MGG_01572	MGG_05963
MGG_01572	MGG_12370
MGG_01572	MGG_06429
MGG_01572	MGG_06242
MGG_01572	MGG_07737
MGG_01572	MGG_04802
MGG_01572	MGG_04179
MGG_01572	MGG_11360
MGG_01572	MGG_04993
MGG_01572	MGG_07545
MGG_01572	MGG_07728
MGG_01572	MGG_09313
MGG_01572	MGG_08840
MGG_01572	MGG_03270
MGG_01572	MGG_02460
MGG_01572	MGG_04470
MGG_01572	MGG_13803
MGG_01572	MGG_04995
MGG_01572	MGG_08867
MGG_01572	MGG_08178
MGG_01572	MGG_06381
MGG_01606	MGG_08783
MGG_01606	MGG_11480
MGG_01606	MGG_09856
MGG_01606	MGG_03840
MGG_01606	MGG_03824
MGG_01606	MGG_13647
MGG_01606	MGG_04590
MGG_01606	MGG_03900
MGG_01606	MGG_05008
MGG_01606	MGG_01662
MGG_01662	MGG_04826
MGG_01662	MGG_03492
MGG_01662	MGG_11871
MGG_01662	MGG_13291
MGG_01662	MGG_08011
MGG_01662	MGG_10751
MGG_01662	MGG_03263
MGG_01662	MGG_01991
MGG_01662	MGG_03494
MGG_01662	MGG_10076
MGG_01662	MGG_02531
MGG_01662	MGG_09602
MGG_01662	MGG_08074
MGG_01662	MGG_04590
MGG_01662	MGG_05008
MGG_01662	MGG_03900
MGG_01778	MGG_03158
MGG_01778	MGG_07724
MGG_01778	MGG_07219
MGG_01778	MGG_02756
MGG_01778	MGG_10910
MGG_01778	MGG_04161
MGG_01778	MGG_09260
MGG_01778	MGG_07215
MGG_01783	MGG_13308
MGG_01906	MGG_02124
MGG_01991	MGG_06011
MGG_02075	MGG_07639
MGG_02084	MGG_05317
MGG_02103	MGG_03847
MGG_02103	MGG_07576
MGG_02252	MGG_13291
MGG_02252	MGG_09602
MGG_02252	MGG_07216
MGG_02252	MGG_05059
MGG_02401	MGG_13803
MGG_02401	MGG_06242
MGG_02460	MGG_03856
MGG_02460	MGG_02881
MGG_02460	MGG_07545
MGG_02460	MGG_07728
MGG_02460	MGG_06242
MGG_02460	MGG_04995
MGG_02460	MGG_04179
MGG_02460	MGG_03270
MGG_02460	MGG_04470
MGG_02460	MGG_05963
MGG_02460	MGG_13803
MGG_02460	MGG_08867
MGG_02460	MGG_04993
MGG_02460	MGG_08840
MGG_02460	MGG_06429
MGG_02460	MGG_04201
MGG_02460	MGG_06381
MGG_02460	MGG_11360
MGG_02460	MGG_04802
MGG_02460	MGG_08178
MGG_02460	MGG_12370
MGG_02460	MGG_09313
MGG_02559	MGG_03465
MGG_02559	MGG_07802
MGG_02559	MGG_09076
MGG_02559	MGG_11575
MGG_02559	MGG_06062
MGG_02611	MGG_04059
MGG_02611	MGG_08129
MGG_02611	MGG_11343
MGG_02611	MGG_05223
MGG_02611	MGG_06221
MGG_02611	MGG_09919
MGG_02710	MGG_11750
MGG_02726	MGG_08108
MGG_02756	MGG_10912
MGG_02756	MGG_12981
MGG_02756	MGG_07216
MGG_02756	MGG_07219
MGG_02756	MGG_09260
MGG_02756	MGG_10961
MGG_02756	MGG_05059
MGG_02756	MGG_10910
MGG_02756	MGG_07215
MGG_02787	MGG_08474
MGG_02811	MGG_07287
MGG_02812	MGG_03840
MGG_02814	MGG_09372
MGG_02881	MGG_04470
MGG_02881	MGG_08840
MGG_02881	MGG_04201
MGG_02881	MGG_08867
MGG_02881	MGG_09313
MGG_02881	MGG_13803
MGG_02884	MGG_04076
MGG_02914	MGG_07884
MGG_02921	MGG_07076
MGG_02921	MGG_10583
MGG_02921	MGG_09757
MGG_02921	MGG_06784
MGG_02943	MGG_04565
MGG_03096	MGG_03840
MGG_03096	MGG_07884
MGG_03096	MGG_13895
MGG_03096	MGG_10076
MGG_03096	MGG_09856
MGG_03158	MGG_05900
MGG_03158	MGG_03739
MGG_03158	MGG_10548
MGG_03158	MGG_07973
MGG_03158	MGG_06862
MGG_03158	MGG_05159
MGG_03158	MGG_06926
MGG_03158	MGG_17376
MGG_03158	MGG_04161
MGG_03158	MGG_13803
MGG_03218	MGG_07287
MGG_03263	MGG_06011
MGG_03270	MGG_07250
MGG_03270	MGG_04802
MGG_03270	MGG_06429
MGG_03270	MGG_06242
MGG_03270	MGG_05963
MGG_03270	MGG_04179
MGG_03270	MGG_06381
MGG_03270	MGG_12370
MGG_03270	MGG_08840
MGG_03270	MGG_13803
MGG_03270	MGG_07728
MGG_03270	MGG_04993
MGG_03270	MGG_09313
MGG_03270	MGG_08867
MGG_03270	MGG_04201
MGG_03270	MGG_04995
MGG_03270	MGG_07737
MGG_03270	MGG_08178
MGG_03270	MGG_11360
MGG_03270	MGG_04470
MGG_03280	MGG_06062
MGG_03280	MGG_06691
MGG_03280	MGG_07187
MGG_03280	MGG_03492
MGG_03280	MGG_05008
MGG_03280	MGG_03900
MGG_03280	MGG_08074
MGG_03416	MGG_14352
MGG_03465	MGG_11575
MGG_03492	MGG_03900
MGG_03492	MGG_05008
MGG_03494	MGG_10533
MGG_03494	MGG_11574
MGG_03583	MGG_03840
MGG_03583	MGG_06950
MGG_03583	MGG_07224
MGG_03583	MGG_09292
MGG_03764	MGG_06691
MGG_03824	MGG_11389
MGG_03824	MGG_11871
MGG_03824	MGG_11480
MGG_03824	MGG_03840
MGG_03824	MGG_03900
MGG_03824	MGG_05008
MGG_03824	MGG_07076
MGG_03824	MGG_06011
MGG_03840	MGG_11389
MGG_03840	MGG_13895
MGG_03840	MGG_04590
MGG_03840	MGG_10076
MGG_03840	MGG_08074
MGG_03840	MGG_07628
MGG_03840	MGG_11480
MGG_03840	MGG_15293
MGG_03840	MGG_07884
MGG_03840	MGG_07224
MGG_03840	MGG_06950
MGG_03840	MGG_09292
MGG_03847	MGG_08760
MGG_03847	MGG_07968
MGG_03856	MGG_04802
MGG_03856	MGG_06242
MGG_03856	MGG_04993
MGG_03900	MGG_05401
MGG_03900	MGG_07455
MGG_03900	MGG_06784
MGG_03900	MGG_10751
MGG_03900	MGG_13291
MGG_03900	MGG_09602
MGG_03900	MGG_07187
MGG_03900	MGG_06011
MGG_03900	MGG_08074
MGG_03900	MGG_04590
MGG_03900	MGG_09250
MGG_04034	MGG_04895
MGG_04034	MGG_06011
MGG_04034	MGG_05317
MGG_04059	MGG_04826
MGG_04059	MGG_05506
MGG_04076	MGG_04733
MGG_04076	MGG_08966
MGG_04159	MGG_05133
MGG_04161	MGG_05900
MGG_04161	MGG_07973
MGG_04161	MGG_06862
MGG_04161	MGG_17376
MGG_04161	MGG_06926
MGG_04161	MGG_05159
MGG_04179	MGG_06381
MGG_04179	MGG_07737
MGG_04179	MGG_05963
MGG_04179	MGG_07728
MGG_04179	MGG_04995
MGG_04179	MGG_04802
MGG_04179	MGG_06429
MGG_04179	MGG_11360
MGG_04179	MGG_09313
MGG_04179	MGG_06242
MGG_04179	MGG_13803
MGG_04179	MGG_08178
MGG_04179	MGG_04993
MGG_04179	MGG_08867
MGG_04179	MGG_08840
MGG_04179	MGG_04470
MGG_04179	MGG_12370
MGG_04201	MGG_07545
MGG_04201	MGG_09829
MGG_04201	MGG_05963
MGG_04201	MGG_04802
MGG_04201	MGG_06381
MGG_04201	MGG_08867
MGG_04201	MGG_08163
MGG_04201	MGG_13803
MGG_04201	MGG_04993
MGG_04201	MGG_06429
MGG_04201	MGG_12370
MGG_04201	MGG_08840
MGG_04201	MGG_09313
MGG_04201	MGG_07737
MGG_04201	MGG_04470
MGG_04201	MGG_08178
MGG_04201	MGG_11360
MGG_04201	MGG_04995
MGG_04470	MGG_07250
MGG_04470	MGG_04565
MGG_04470	MGG_07545
MGG_04470	MGG_05963
MGG_04470	MGG_06381
MGG_04470	MGG_06429
MGG_04470	MGG_07728
MGG_04470	MGG_04802
MGG_04470	MGG_13803
MGG_04470	MGG_08867
MGG_04470	MGG_04993
MGG_04470	MGG_12370
MGG_04470	MGG_09313
MGG_04470	MGG_08840
MGG_04470	MGG_06242
MGG_04470	MGG_08178
MGG_04470	MGG_04995
MGG_04470	MGG_07737
MGG_04470	MGG_11360
MGG_04503	MGG_11343
MGG_04503	MGG_07545
MGG_04503	MGG_07187
MGG_04565	MGG_06429
MGG_04565	MGG_12370
MGG_04565	MGG_04993
MGG_04565	MGG_13803
MGG_04565	MGG_06242
MGG_04565	MGG_08840
MGG_04565	MGG_06381
MGG_04590	MGG_08783
MGG_04590	MGG_08074
MGG_04590	MGG_07268
MGG_04590	MGG_04895
MGG_04590	MGG_05008
MGG_04590	MGG_13647
MGG_04628	MGG_06580
MGG_04628	MGG_10860
MGG_04628	MGG_06139
MGG_04802	MGG_07737
MGG_04802	MGG_07545
MGG_04802	MGG_04995
MGG_04802	MGG_05963
MGG_04802	MGG_06381
MGG_04802	MGG_11360
MGG_04802	MGG_07728
MGG_04802	MGG_06429
MGG_04802	MGG_12370
MGG_04802	MGG_13803
MGG_04802	MGG_04993
MGG_04802	MGG_06242
MGG_04802	MGG_08867
MGG_04802	MGG_09313
MGG_04802	MGG_08178
MGG_04802	MGG_08840
MGG_04826	MGG_06950
MGG_04826	MGG_15293
MGG_04826	MGG_11343
MGG_04826	MGG_08011
MGG_04826	MGG_11389
MGG_04826	MGG_08074
MGG_04826	MGG_07187
MGG_04895	MGG_06547
MGG_04895	MGG_07268
MGG_04895	MGG_08108
MGG_04895	MGG_08011
MGG_04895	MGG_07933
MGG_04895	MGG_08615
MGG_04895	MGG_05159
MGG_04993	MGG_07737
MGG_04993	MGG_07250
MGG_04993	MGG_07545
MGG_04993	MGG_07728
MGG_04993	MGG_11360
MGG_04993	MGG_05963
MGG_04993	MGG_06381
MGG_04993	MGG_06429
MGG_04993	MGG_06242
MGG_04993	MGG_04995
MGG_04993	MGG_13803
MGG_04993	MGG_08178
MGG_04993	MGG_09313
MGG_04993	MGG_12370
MGG_04993	MGG_08840
MGG_04993	MGG_08867
MGG_05008	MGG_11389
MGG_05008	MGG_05401
MGG_05008	MGG_06784
MGG_05008	MGG_09602
MGG_05008	MGG_13291
MGG_05008	MGG_10751
MGG_05008	MGG_07187
MGG_05008	MGG_06011
MGG_05008	MGG_08074
MGG_05008	MGG_09250
MGG_05045	MGG_10288
MGG_05059	MGG_07215
MGG_05059	MGG_07219
MGG_05059	MGG_07216
MGG_05098	MGG_12025
MGG_05159	MGG_07935
MGG_05159	MGG_07973
MGG_05159	MGG_06862
MGG_05159	MGG_17376
MGG_05159	MGG_06926
MGG_05159	MGG_08108
MGG_05159	MGG_08011
MGG_05223	MGG_07187
MGG_05223	MGG_11343
MGG_05223	MGG_08129
MGG_05223	MGG_06950
MGG_05223	MGG_07224
MGG_05317	MGG_09668
MGG_05317	MGG_05506
MGG_05317	MGG_06011
MGG_05401	MGG_07268
MGG_05401	MGG_05555
MGG_05401	MGG_14348
MGG_05401	MGG_06062
MGG_05554	MGG_05555
MGG_05555	MGG_06062
MGG_05565	MGG_09541
MGG_05565	MGG_09138
MGG_05599	MGG_05785
MGG_05599	MGG_09272
MGG_05599	MGG_10189
MGG_05599	MGG_18137
MGG_05623	MGG_14069
MGG_05623	MGG_06446
MGG_05785	MGG_18137
MGG_05785	MGG_09272
MGG_05785	MGG_10189
MGG_05900	MGG_06862
MGG_05908	MGG_08498
MGG_05940	MGG_08778
MGG_05963	MGG_04995
MGG_05963	MGG_07728
MGG_05963	MGG_08178
MGG_05963	MGG_06381
MGG_05963	MGG_06242
MGG_05963	MGG_09313
MGG_05963	MGG_08867
MGG_05963	MGG_06429
MGG_05963	MGG_13803
MGG_05963	MGG_11360
MGG_05963	MGG_08840
MGG_05963	MGG_12370
MGG_06011	MGG_08074
MGG_06011	MGG_08783
MGG_06062	MGG_08074
MGG_06062	MGG_07268
MGG_06062	MGG_07187
MGG_06139	MGG_10860
MGG_06139	MGG_13538
MGG_06139	MGG_09014
MGG_06139	MGG_06580
MGG_06139	MGG_06446
MGG_06169	MGG_09919
MGG_06169	MGG_07419
MGG_06242	MGG_04995
MGG_06242	MGG_07728
MGG_06242	MGG_11360
MGG_06242	MGG_06381
MGG_06242	MGG_06429
MGG_06242	MGG_09313
MGG_06242	MGG_12370
MGG_06242	MGG_13803
MGG_06242	MGG_08840
MGG_06242	MGG_08178
MGG_06242	MGG_08867
MGG_06326	MGG_10293
MGG_06381	MGG_04995
MGG_06381	MGG_06429
MGG_06381	MGG_07545
MGG_06381	MGG_08840
MGG_06381	MGG_11360
MGG_06381	MGG_07728
MGG_06381	MGG_12370
MGG_06381	MGG_08178
MGG_06381	MGG_08867
MGG_06381	MGG_13803
MGG_06381	MGG_09313
MGG_06429	MGG_04995
MGG_06429	MGG_11360
MGG_06429	MGG_07728
MGG_06429	MGG_13803
MGG_06429	MGG_08867
MGG_06429	MGG_12370
MGG_06429	MGG_08178
MGG_06429	MGG_09313
MGG_06429	MGG_08840
MGG_06446	MGG_09014
MGG_06446	MGG_08011
MGG_06446	MGG_11389
MGG_06547	MGG_08074
MGG_06547	MGG_07187
MGG_06547	MGG_07268
MGG_06636	MGG_07884
MGG_06653	MGG_12247
MGG_06691	MGG_10860
MGG_06691	MGG_08293
MGG_06691	MGG_11480
MGG_06691	MGG_09919
MGG_06738	MGG_09091
MGG_06784	MGG_08985
MGG_06862	MGG_07973
MGG_06862	MGG_06926
MGG_06926	MGG_07973
MGG_06926	MGG_17376
MGG_06950	MGG_09292
MGG_06950	MGG_07224
MGG_06950	MGG_15402
MGG_06950	MGG_11389
MGG_07076	MGG_11389
MGG_07187	MGG_07545
MGG_07187	MGG_09541
MGG_07187	MGG_07268
MGG_07187	MGG_08074
MGG_07215	MGG_07216
MGG_07215	MGG_07219
MGG_07215	MGG_09260
MGG_07215	MGG_10910
MGG_07219	MGG_10961
MGG_07224	MGG_09292
MGG_07224	MGG_15402
MGG_07224	MGG_11389
MGG_07250	MGG_04995
MGG_07250	MGG_07737
MGG_07250	MGG_08178
MGG_07250	MGG_11360
MGG_07268	MGG_07628
MGG_07268	MGG_08074
MGG_07419	MGG_09919
MGG_07545	MGG_04995
MGG_07545	MGG_08840
MGG_07545	MGG_07728
MGG_07545	MGG_12370
MGG_07545	MGG_13803
MGG_07545	MGG_08178
MGG_07545	MGG_11360
MGG_07545	MGG_08867
MGG_07545	MGG_09313
MGG_07627	MGG_11480
MGG_07628	MGG_08011
MGG_07628	MGG_08840
MGG_07728	MGG_04995
MGG_07728	MGG_11716
MGG_07728	MGG_12370
MGG_07728	MGG_11360
MGG_07728	MGG_07737
MGG_07728	MGG_08840
MGG_07728	MGG_13803
MGG_07728	MGG_08867
MGG_07728	MGG_08178
MGG_07728	MGG_09313
MGG_07737	MGG_04995
MGG_07737	MGG_12370
MGG_07737	MGG_13803
MGG_07737	MGG_08867
MGG_07737	MGG_09313
MGG_07737	MGG_08840
MGG_07737	MGG_08178
MGG_07737	MGG_11360
MGG_07790	MGG_13291
MGG_07802	MGG_11575
MGG_07848	MGG_13624
MGG_07884	MGG_13308
MGG_07884	MGG_10076
MGG_07884	MGG_13895
MGG_07884	MGG_10189
MGG_07884	MGG_09856
MGG_07933	MGG_07935
MGG_07933	MGG_08108
MGG_07933	MGG_08011
MGG_07935	MGG_08615
MGG_07957	MGG_10938
MGG_07973	MGG_17376
MGG_08011	MGG_08615
MGG_08011	MGG_11389
MGG_08074	MGG_09541
MGG_08108	MGG_08615
MGG_08108	MGG_11871
MGG_08178	MGG_04995
MGG_08178	MGG_12370
MGG_08178	MGG_13803
MGG_08178	MGG_09313
MGG_08178	MGG_08840
MGG_08178	MGG_08867
MGG_08178	MGG_11360
MGG_08330	MGG_09668
MGG_08389	MGG_10613
MGG_08519	MGG_16813
MGG_08778	MGG_08783
MGG_08840	MGG_04995
MGG_08840	MGG_11360
MGG_08840	MGG_13803
MGG_08840	MGG_08867
MGG_08840	MGG_09313
MGG_08840	MGG_12370
MGG_08867	MGG_04995
MGG_08867	MGG_11360
MGG_08867	MGG_13803
MGG_08867	MGG_12370
MGG_08867	MGG_09313
MGG_09063	MGG_11871
MGG_09076	MGG_11575
MGG_09130	MGG_15745
MGG_09138	MGG_09541
MGG_09272	MGG_10189
MGG_09272	MGG_18137
MGG_09313	MGG_04995
MGG_09313	MGG_11360
MGG_09313	MGG_13803
MGG_09313	MGG_12370
MGG_09323	MGG_10583
MGG_09757	MGG_10583
MGG_09829	MGG_08163
MGG_09829	MGG_10189
MGG_09829	MGG_11716
MGG_09856	MGG_10076
MGG_09856	MGG_13895
MGG_09919	MGG_14348
MGG_10076	MGG_13895
MGG_10189	MGG_18137
MGG_10274	MGG_10910
MGG_10533	MGG_11574
MGG_10910	MGG_10911
MGG_10910	MGG_10912
MGG_10910	MGG_12981
MGG_10910	MGG_10961
MGG_10911	MGG_10912
MGG_10911	MGG_12981
MGG_10912	MGG_12981
MGG_11343	MGG_11389
MGG_11360	MGG_04995
MGG_11360	MGG_12370
MGG_11360	MGG_13803
MGG_11480	MGG_13647
MGG_12025	MGG_13801
MGG_12175	MGG_15331
MGG_12370	MGG_04995
MGG_12370	MGG_13803
MGG_13803	MGG_04995
