# Supplementary material for: Transcriptome and Quasi-Targeted Metabolome Analyze Overexpression of 4-Hydroxyphenylpyruvate Dioxygenase Alleviates Fungal Toxicity of 9-Phenanthrol in Magnaporthe oryzae
Source: Int J Mol Sci. 2022 Jun 27;23(13):7116. doi: 10.3390/ijms23137116 (PMC9266922; doi:10.3390/ijms23137116)
Supplement: Supplementary file 1 [file ijms-23-07116-s001.zip › Table S9.xlsx]

## Sheet: Sheet1
Table S9. The primer sequences of candidate genes for pDL2 construction
Name	Sequence 5'-3'
MGG_05555_f	CAGATCTTGGCTTTCGTAGGAACCCAATCTTCAAAATGTCCCTCCATAACGGCGC
MGG_05555_r	CGTGCGCAGAGGAGCCTGAATGTTGAGTGGAATGATCTACTGCGGGATGACATGCT
MGG_08363_f	CAGATCTTGGCTTTCGTAGGAACCCAATCTTCAAAATGTCGTCTTCCACAGTGGA
MGG_08363_r	CGTGCGCAGAGGAGCCTGAATGTTGAGTGGAATGATTCAAGATAGGCGGACGACAA
MGG_06691_f	CAGATCTTGGCTTTCGTAGGAACCCAATCTTCAAAATGTCACCCTCTGCCATCAC
MGG_06691_r	CGTGCGCAGAGGAGCCTGAATGTTGAGTGGAATGATTTACAAGTTTCCACGCTCAG
MGG_01183_f	CAGATCTTGGCTTTCGTAGGAACCCAATCTTCAAAATGGGCAGAATAAAGAAGAA
MGG_01183_r	CGTGCGCAGAGGAGCCTGAATGTTGAGTGGAATGATCTATGTTGCCTTCCCCTTGG
MGG_00560_f	CAGATCTTGGCTTTCGTAGGAACCCAATCTTCAAAATGACGACCGATACTACCAA
MGG_00560_r	CGTGCGCAGAGGAGCCTGAATGTTGAGTGGAATGATTCAGTCCGTCGCAAGCAAAG
